# Supplementary material
Source: publisher figshare collection journal article supplement (https://acs.figshare.com/ndownloader/files/3745348)
Supplement: Supplementary file 1 [file 3745348]

 
data_a
 
_audit_creation_method            SHELXL-2014/6
_chemical_name_systematic         ?
_chemical_name_common             ?
_chemical_melting_point           ?
_chemical_formula_moiety          ?
_chemical_formula_sum
 'C14 H14 Br N O5' 
_chemical_formula_weight          356.17

loop_
 _atom_type_symbol
 _atom_type_description
 _atom_type_scat_dispersion_real
 _atom_type_scat_dispersion_imag
 _atom_type_scat_source
 'C'  'C'   0.0033   0.0016
 'International Tables Vol C Tables 4.2.6.8 and 6.1.1.4'
 'H'  'H'   0.0000   0.0000
 'International Tables Vol C Tables 4.2.6.8 and 6.1.1.4'
 'Br'  'Br'  -0.2901   2.4595
 'International Tables Vol C Tables 4.2.6.8 and 6.1.1.4'
 'N'  'N'   0.0061   0.0033
 'International Tables Vol C Tables 4.2.6.8 and 6.1.1.4'
 'O'  'O'   0.0106   0.0060
 'International Tables Vol C Tables 4.2.6.8 and 6.1.1.4'
 
_space_group_crystal_system       triclinic
_space_group_IT_number            1
_space_group_name_H-M_alt         'P 1'
_space_group_name_Hall            'P 1'
 
_shelx_space_group_comment
;
The symmetry employed for this shelxl refinement is uniquely defined
by the following loop, which should always be used as a source of
symmetry information in preference to the above space-group names.
They are only intended as comments.
;
 
loop_
 _space_group_symop_operation_xyz
 'x, y, z'
 
_cell_length_a                    8.366(2)
_cell_length_b                    9.560(2)
_cell_length_c                    11.005(2)
_cell_angle_alpha                 113.946(9)
_cell_angle_beta                  107.506(11)
_cell_angle_gamma                 92.316(13)
_cell_volume                      753.7(3)
_cell_formula_units_Z             2
_cell_measurement_temperature     173(2)
_cell_measurement_reflns_used     12950
_cell_measurement_theta_min       2.373
_cell_measurement_theta_max       27.458
 
_exptl_crystal_description        plate
_exptl_crystal_colour             colorless
_exptl_crystal_density_meas       ?
_exptl_crystal_density_method     ?
_exptl_crystal_density_diffrn     1.569          
_exptl_crystal_F_000              360
_exptl_transmission_factor_min    ?
_exptl_transmission_factor_max    ?
_exptl_crystal_size_max           0.190
_exptl_crystal_size_mid           0.190
_exptl_crystal_size_min           0.080
_exptl_absorpt_coefficient_mu     2.747
_shelx_estimated_absorpt_T_min    0.623
_shelx_estimated_absorpt_T_max    0.810
_exptl_absorpt_correction_type    multi-scan
_exptl_absorpt_correction_T_min   0.7561
_exptl_absorpt_correction_T_max   1.0000
_exptl_absorpt_process_details    'CrystalClear (Rigaku Inc., 2008)'
_exptl_absorpt_special_details    ?
_diffrn_ambient_temperature       173(2)
_diffrn_radiation_wavelength      0.71073
_diffrn_radiation_type            MoK\a
_diffrn_source                    ?
_diffrn_measurement_device_type   ?
_diffrn_measurement_method        ?
_diffrn_detector_area_resol_mean  ?
_diffrn_reflns_number             12950
_diffrn_reflns_av_unetI/netI      0.0464
_diffrn_reflns_av_R_equivalents   0.0330
_diffrn_reflns_limit_h_min        -10
_diffrn_reflns_limit_h_max        10
_diffrn_reflns_limit_k_min        -12
_diffrn_reflns_limit_k_max        12
_diffrn_reflns_limit_l_min        -14
_diffrn_reflns_limit_l_max        14
_diffrn_reflns_theta_min          2.373
_diffrn_reflns_theta_max          27.458
_diffrn_reflns_theta_full         25.242
_diffrn_measured_fraction_theta_max   0.997
_diffrn_measured_fraction_theta_full  0.997
_diffrn_reflns_Laue_measured_fraction_max    0.997
_diffrn_reflns_Laue_measured_fraction_full   0.997
_diffrn_reflns_point_group_measured_fraction_max   0.980
_diffrn_reflns_point_group_measured_fraction_full  0.987
_reflns_number_total              6757
_reflns_number_gt                 6054
_reflns_threshold_expression      'I > 2\s(I)'
_reflns_Friedel_coverage          0.965
_reflns_Friedel_fraction_max      0.962
_reflns_Friedel_fraction_full     0.977
 
_reflns_special_details
;
 Reflections were merged by SHELXL according to the crystal
 class for the calculation of statistics and refinement.
 
 _reflns_Friedel_fraction is defined as the number of unique
 Friedel pairs measured divided by the number that would be
 possible theoretically, ignoring centric projections and
 systematic absences.
;
 
_computing_data_collection        'CrystalClear (Rigaku Inc., 2008)'
_computing_cell_refinement        'CrystalClear (Rigaku Inc., 2008)'
_computing_data_reduction         'CrystalClear (Rigaku Inc., 2008)'
_computing_structure_solution     'SHELXT-2014 (Sheldrick, 2014)'
_computing_structure_refinement   'SHELXL-2014/6 (Sheldrick, 2014)'
_computing_molecular_graphics     
;
OLEX2: A complete structure solution, refinement and analysis program.
(Dolomanov, O.V.; Bourhis, L.J.; Gildea, R.J.; Howard, J.A.K.; 
Puschmann, H., J. Appl. Cryst., 2009, 42, 339-341.)
; 
_computing_publication_material   'CIFTAB (Sheldrick, 2014)'
_refine_special_details           ?
_refine_ls_structure_factor_coef  Fsqd
_refine_ls_matrix_type            full
_refine_ls_weighting_scheme       calc
_refine_ls_weighting_details
'w=1/[\s^2^(Fo^2^)+(0.0221P)^2^+0.1237P] where P=(Fo^2^+2Fc^2^)/3'
_atom_sites_solution_primary      direct
_atom_sites_solution_secondary    difmap
_atom_sites_solution_hydrogens    geom
_refine_ls_hydrogen_treatment     constr
_refine_ls_extinction_method      none
_refine_ls_extinction_coef        .
_refine_ls_abs_structure_details
;
 Flack x determined using 2453 quotients [(I+)-(I-)]/[(I+)+(I-)]
 (Parsons, Flack and Wagner, Acta Cryst. B69 (2013) 249-259).
;
_refine_ls_abs_structure_Flack    0.002(6)
_chemical_absolute_configuration  ad
_refine_ls_number_reflns          6757
_refine_ls_number_parameters      383
_refine_ls_number_restraints      3
_refine_ls_R_factor_all           0.0457
_refine_ls_R_factor_gt            0.0390
_refine_ls_wR_factor_ref          0.0735
_refine_ls_wR_factor_gt           0.0700
_refine_ls_goodness_of_fit_ref    1.087
_refine_ls_restrained_S_all       1.087
_refine_ls_shift/su_max           0.007
_refine_ls_shift/su_mean          0.000
 
loop_
 _atom_site_label
 _atom_site_type_symbol
 _atom_site_fract_x
 _atom_site_fract_y
 _atom_site_fract_z
 _atom_site_U_iso_or_equiv
 _atom_site_adp_type
 _atom_site_occupancy
 _atom_site_site_symmetry_order  
 _atom_site_calc_flag
 _atom_site_refinement_flags_posn
 _atom_site_refinement_flags_adp
 _atom_site_refinement_flags_occupancy
 _atom_site_disorder_assembly
 _atom_site_disorder_group
Br1 Br -0.08708(7) 0.47702(6) 0.18954(6) 0.0615(2) Uani 1 1 d . . . . .
O1 O 0.4031(4) -0.2138(4) 0.4945(4) 0.0358(8) Uani 1 1 d . . . . .
O2 O 0.8892(4) -0.0102(4) 0.6739(3) 0.0412(8) Uani 1 1 d . . . . .
O3 O 0.8630(4) -0.0739(4) 0.4480(3) 0.0333(7) Uani 1 1 d . . . . .
O4 O 0.3119(4) -0.0997(4) 0.2758(3) 0.0287(8) Uani 1 1 d . . . . .
O5 O 0.2062(5) -0.2128(4) 0.0388(4) 0.0398(9) Uani 1 1 d . . . . .
N1 N 0.4323(5) -0.0698(5) 0.6153(4) 0.0328(9) Uani 1 1 d . . . . .
C1 C 0.6156(5) -0.0345(5) 0.5036(4) 0.0246(8) Uani 1 1 d . . . . .
H1 H 0.5925 0.0267 0.4470 0.030 Uiso 1 1 calc R U . . .
C2 C 0.5070(6) -0.1989(5) 0.4155(5) 0.0277(10) Uani 1 1 d . . . . .
H2 H 0.5842 -0.2767 0.4093 0.033 Uiso 1 1 calc R U . . .
C3 C 0.5450(5) 0.0282(5) 0.6207(4) 0.0284(9) Uani 1 1 d . . . . .
C4 C 0.8050(5) -0.0365(5) 0.5551(5) 0.0276(9) Uani 1 1 d . . . . .
C5 C 1.0445(6) -0.0738(6) 0.4805(6) 0.0426(12) Uani 1 1 d . . . . .
H5A H 1.0704 -0.1108 0.3926 0.064 Uiso 1 1 calc R U . . .
H5B H 1.0774 -0.1429 0.5258 0.064 Uiso 1 1 calc R U . . .
H5C H 1.1084 0.0322 0.5448 0.064 Uiso 1 1 calc R U . . .
C6 C 0.3946(6) -0.2319(6) 0.2682(5) 0.0292(11) Uani 1 1 d . . . . .
H6A H 0.4637 -0.2485 0.2063 0.035 Uiso 1 1 calc R U . . .
H6B H 0.3078 -0.3273 0.2280 0.035 Uiso 1 1 calc R U . . .
C7 C 0.2224(6) -0.1041(6) 0.1508(5) 0.0272(11) Uani 1 1 d . . . . .
C8 C 0.1484(6) 0.0375(6) 0.1640(5) 0.0268(11) Uani 1 1 d . . . . .
C9 C 0.0437(7) 0.0418(7) 0.0416(6) 0.0348(13) Uani 1 1 d . . . . .
H9 H 0.0203 -0.0452 -0.0476 0.042 Uiso 1 1 calc R U . . .
C10 C -0.0269(8) 0.1719(7) 0.0486(6) 0.0396(14) Uani 1 1 d . . . . .
H10 H -0.0994 0.1746 -0.0352 0.048 Uiso 1 1 calc R U . . .
C11 C 0.0095(8) 0.2981(7) 0.1792(7) 0.0380(13) Uani 1 1 d . . . . .
C12 C 0.1146(8) 0.2970(7) 0.3020(6) 0.0398(14) Uani 1 1 d . . . . .
H12 H 0.1394 0.3853 0.3906 0.048 Uiso 1 1 calc R U . . .
C13 C 0.1843(7) 0.1654(6) 0.2951(6) 0.0320(12) Uani 1 1 d . . . . .
H13 H 0.2560 0.1628 0.3792 0.038 Uiso 1 1 calc R U . . .
C14 C 0.5957(7) 0.1928(6) 0.7342(5) 0.0384(11) Uani 1 1 d . . . . .
H14A H 0.5508 0.2629 0.6930 0.058 Uiso 1 1 calc R U . . .
H14B H 0.7204 0.2212 0.7756 0.058 Uiso 1 1 calc R U . . .
H14C H 0.5491 0.2018 0.8083 0.058 Uiso 1 1 calc R U . . .
Br1A Br 0.74406(6) -0.27001(5) 1.05513(5) 0.05054(17) Uani 1 1 d . . . . .
O1A O 0.2416(5) 0.3277(5) 0.7016(4) 0.0402(9) Uani 1 1 d . . . . .
O2A O -0.1969(4) 0.2912(4) 0.5562(4) 0.0436(9) Uani 1 1 d . . . . .
O3A O -0.2293(4) 0.5369(4) 0.6661(3) 0.0407(8) Uani 1 1 d . . . . .
O4A O 0.3117(5) 0.2760(4) 0.9435(3) 0.0318(8) Uani 1 1 d . . . . .
O5A O 0.4373(5) 0.4150(4) 1.1795(4) 0.0428(10) Uani 1 1 d . . . . .
N1A N 0.2574(5) 0.4549(5) 0.6678(4) 0.0415(10) Uani 1 1 d . . . . .
C1A C 0.0361(5) 0.4796(5) 0.7578(4) 0.0261(9) Uani 1 1 d . . . . .
H1A H 0.0371 0.5635 0.8495 0.031 Uiso 1 1 calc R U . . .
C2A C 0.1266(6) 0.3525(5) 0.7812(5) 0.0283(10) Uani 1 1 d . . . . .
H2A H 0.0425 0.2548 0.7446 0.034 Uiso 1 1 calc R U . . .
C3A C 0.1486(6) 0.5378(5) 0.6974(5) 0.0317(10) Uani 1 1 d . . . . .
C4A C -0.1433(5) 0.4207(5) 0.6486(5) 0.0287(9) Uani 1 1 d . . . . .
C5A C -0.3987(7) 0.5031(8) 0.5626(7) 0.0553(16) Uani 1 1 d . . . . .
H5AA H -0.3907 0.4713 0.4683 0.083 Uiso 1 1 calc R U . . .
H5AB H -0.4501 0.5965 0.5873 0.083 Uiso 1 1 calc R U . . .
H5AC H -0.4696 0.4187 0.5622 0.083 Uiso 1 1 calc R U . . .
C6A C 0.2321(7) 0.4048(6) 0.9358(5) 0.0322(11) Uani 1 1 d . . . . .
H6AA H 0.3198 0.4980 0.9703 0.039 Uiso 1 1 calc R U . . .
H6AB H 0.1586 0.4309 0.9945 0.039 Uiso 1 1 calc R U . . .
C7A C 0.4127(7) 0.2975(6) 1.0733(5) 0.0301(11) Uani 1 1 d . . . . .
C8A C 0.4898(7) 0.1570(6) 1.0662(5) 0.0271(11) Uani 1 1 d . . . . .
C9A C 0.6047(7) 0.1625(7) 1.1907(6) 0.0346(13) Uani 1 1 d . . . . .
H9A H 0.6304 0.2534 1.2775 0.042 Uiso 1 1 calc R U . . .
C10A C 0.6816(7) 0.0363(7) 1.1886(6) 0.0371(13) Uani 1 1 d . . . . .
H10A H 0.7604 0.0398 1.2729 0.045 Uiso 1 1 calc R U . . .
C11A C 0.6409(8) -0.0945(7) 1.0613(6) 0.0348(13) Uani 1 1 d . . . . .
C12A C 0.5280(7) -0.1030(7) 0.9364(6) 0.0367(13) Uani 1 1 d . . . . .
H12A H 0.5031 -0.1939 0.8496 0.044 Uiso 1 1 calc R U . . .
C13A C 0.4523(7) 0.0234(7) 0.9408(6) 0.0337(12) Uani 1 1 d . . . . .
H13A H 0.3730 0.0187 0.8561 0.040 Uiso 1 1 calc R U . . .
C14A C 0.1283(7) 0.6762(7) 0.6664(7) 0.0505(15) Uani 1 1 d . . . . .
H14D H 0.1332 0.7672 0.7525 0.076 Uiso 1 1 calc R U . . .
H14E H 0.0179 0.6547 0.5917 0.076 Uiso 1 1 calc R U . . .
H14F H 0.2203 0.6972 0.6347 0.076 Uiso 1 1 calc R U . . .
 
loop_
 _atom_site_aniso_label
 _atom_site_aniso_U_11
 _atom_site_aniso_U_22
 _atom_site_aniso_U_33
 _atom_site_aniso_U_23
 _atom_site_aniso_U_13
 _atom_site_aniso_U_12
Br1 0.0734(5) 0.0471(4) 0.0760(5) 0.0385(3) 0.0231(4) 0.0327(3)
O1 0.0345(18) 0.0377(19) 0.040(2) 0.0206(16) 0.0147(16) 0.0027(15)
O2 0.0328(19) 0.058(2) 0.0322(19) 0.0224(17) 0.0061(15) 0.0141(17)
O3 0.0270(16) 0.0459(19) 0.0365(17) 0.0229(15) 0.0161(14) 0.0137(14)
O4 0.0328(18) 0.0267(17) 0.0234(16) 0.0102(14) 0.0060(14) 0.0111(14)
O5 0.051(2) 0.033(2) 0.0268(19) 0.0080(16) 0.0086(17) 0.0127(18)
N1 0.029(2) 0.041(2) 0.030(2) 0.0171(19) 0.0106(18) 0.0079(18)
C1 0.021(2) 0.028(2) 0.028(2) 0.0157(18) 0.0071(17) 0.0070(17)
C2 0.026(2) 0.029(2) 0.033(3) 0.016(2) 0.013(2) 0.0089(19)
C3 0.025(2) 0.032(2) 0.030(2) 0.0150(19) 0.0093(18) 0.0099(18)
C4 0.025(2) 0.026(2) 0.036(2) 0.0154(19) 0.014(2) 0.0067(17)
C5 0.029(3) 0.053(3) 0.060(3) 0.030(3) 0.026(2) 0.017(2)
C6 0.031(3) 0.024(2) 0.032(3) 0.013(2) 0.010(2) 0.014(2)
C7 0.024(2) 0.030(3) 0.025(2) 0.012(2) 0.004(2) 0.002(2)
C8 0.028(3) 0.027(3) 0.025(2) 0.013(2) 0.006(2) 0.007(2)
C9 0.037(3) 0.036(3) 0.027(3) 0.012(2) 0.007(2) 0.007(3)
C10 0.043(3) 0.047(4) 0.035(3) 0.027(3) 0.007(3) 0.015(3)
C11 0.043(3) 0.031(3) 0.048(3) 0.023(3) 0.018(3) 0.015(3)
C12 0.052(4) 0.033(3) 0.036(3) 0.017(2) 0.015(3) 0.012(3)
C13 0.039(3) 0.029(3) 0.029(3) 0.015(2) 0.009(2) 0.010(2)
C14 0.041(3) 0.041(3) 0.033(3) 0.013(2) 0.015(2) 0.013(2)
Br1A 0.0654(4) 0.0454(3) 0.0613(4) 0.0349(3) 0.0302(3) 0.0333(3)
O1A 0.045(2) 0.052(2) 0.0353(19) 0.0250(18) 0.0190(17) 0.0260(19)
O2A 0.039(2) 0.0287(18) 0.043(2) 0.0132(16) -0.0069(16) -0.0034(15)
O3A 0.0355(18) 0.047(2) 0.045(2) 0.0244(17) 0.0138(16) 0.0197(16)
O4A 0.041(2) 0.0275(17) 0.0259(17) 0.0141(14) 0.0059(15) 0.0152(15)
O5A 0.055(3) 0.037(2) 0.0272(19) 0.0107(17) 0.0064(18) 0.0187(19)
N1A 0.032(2) 0.057(3) 0.039(2) 0.027(2) 0.0088(19) 0.008(2)
C1A 0.029(2) 0.026(2) 0.025(2) 0.0125(17) 0.0093(18) 0.0064(17)
C2A 0.029(2) 0.029(2) 0.027(2) 0.013(2) 0.008(2) 0.010(2)
C3A 0.028(2) 0.036(2) 0.027(2) 0.016(2) 0.0041(19) -0.002(2)
C4A 0.025(2) 0.037(2) 0.034(2) 0.023(2) 0.0119(19) 0.0091(18)
C5A 0.033(3) 0.080(4) 0.076(4) 0.056(4) 0.016(3) 0.026(3)
C6A 0.040(3) 0.027(2) 0.028(2) 0.012(2) 0.010(2) 0.011(2)
C7A 0.035(3) 0.029(3) 0.031(3) 0.016(2) 0.013(2) 0.011(2)
C8A 0.030(3) 0.034(3) 0.025(2) 0.017(2) 0.012(2) 0.010(2)
C9A 0.044(3) 0.040(3) 0.026(3) 0.018(2) 0.013(2) 0.017(3)
C10A 0.040(3) 0.046(4) 0.034(3) 0.026(3) 0.013(3) 0.019(3)
C11A 0.040(3) 0.041(3) 0.043(3) 0.030(3) 0.023(3) 0.020(3)
C12A 0.044(3) 0.031(3) 0.033(3) 0.011(2) 0.013(3) 0.014(3)
C13A 0.037(3) 0.038(3) 0.027(3) 0.018(2) 0.009(2) 0.009(2)
C14A 0.043(3) 0.050(3) 0.066(4) 0.040(3) 0.010(3) 0.003(3)
 
_geom_special_details
;
 All esds (except the esd in the dihedral angle between two l.s. planes)
 are estimated using the full covariance matrix.  The cell esds are taken
 into account individually in the estimation of esds in distances, angles
 and torsion angles; correlations between esds in cell parameters are only
 used when they are defined by crystal symmetry.  An approximate (isotropic)
 treatment of cell esds is used for estimating esds involving l.s. planes.
;
 
loop_
 _geom_bond_atom_site_label_1
 _geom_bond_atom_site_label_2
 _geom_bond_distance
 _geom_bond_site_symmetry_2
 _geom_bond_publ_flag
Br1 C11 1.898(6) . ?
O1 N1 1.419(5) . ?
O1 C2 1.442(5) . ?
O2 C4 1.198(5) . ?
O3 C4 1.330(5) . ?
O3 C5 1.452(5) . ?
O4 C7 1.336(6) . ?
O4 C6 1.450(6) . ?
O5 C7 1.211(6) . ?
N1 C3 1.272(6) . ?
C1 C3 1.493(6) . ?
C1 C4 1.518(5) . ?
C1 C2 1.534(6) . ?
C1 H1 1.0000 . ?
C2 C6 1.501(7) . ?
C2 H2 1.0000 . ?
C3 C14 1.499(6) . ?
C5 H5A 0.9800 . ?
C5 H5B 0.9800 . ?
C5 H5C 0.9800 . ?
C6 H6A 0.9900 . ?
C6 H6B 0.9900 . ?
C7 C8 1.483(7) . ?
C8 C9 1.387(7) . ?
C8 C13 1.394(7) . ?
C9 C10 1.382(8) . ?
C9 H9 0.9500 . ?
C10 C11 1.384(8) . ?
C10 H10 0.9500 . ?
C11 C12 1.377(8) . ?
C12 C13 1.392(8) . ?
C12 H12 0.9500 . ?
C13 H13 0.9500 . ?
C14 H14A 0.9800 . ?
C14 H14B 0.9800 . ?
C14 H14C 0.9800 . ?
Br1A C11A 1.903(6) . ?
O1A N1A 1.421(6) . ?
O1A C2A 1.452(6) . ?
O2A C4A 1.195(5) . ?
O3A C4A 1.328(5) . ?
O3A C5A 1.450(6) . ?
O4A C7A 1.348(6) . ?
O4A C6A 1.444(6) . ?
O5A C7A 1.200(6) . ?
N1A C3A 1.261(6) . ?
C1A C3A 1.507(6) . ?
C1A C4A 1.520(6) . ?
C1A C2A 1.525(6) . ?
C1A H1A 1.0000 . ?
C2A C6A 1.514(6) . ?
C2A H2A 1.0000 . ?
C3A C14A 1.498(6) . ?
C5A H5AA 0.9800 . ?
C5A H5AB 0.9800 . ?
C5A H5AC 0.9800 . ?
C6A H6AA 0.9900 . ?
C6A H6AB 0.9900 . ?
C7A C8A 1.497(7) . ?
C8A C13A 1.382(7) . ?
C8A C9A 1.396(7) . ?
C9A C10A 1.385(8) . ?
C9A H9A 0.9500 . ?
C10A C11A 1.378(8) . ?
C10A H10A 0.9500 . ?
C11A C12A 1.382(8) . ?
C12A C13A 1.377(8) . ?
C12A H12A 0.9500 . ?
C13A H13A 0.9500 . ?
C14A H14D 0.9800 . ?
C14A H14E 0.9800 . ?
C14A H14F 0.9800 . ?
 
loop_
 _geom_angle_atom_site_label_1
 _geom_angle_atom_site_label_2
 _geom_angle_atom_site_label_3
 _geom_angle
 _geom_angle_site_symmetry_1
 _geom_angle_site_symmetry_3
 _geom_angle_publ_flag
N1 O1 C2 109.2(3) . . ?
C4 O3 C5 117.0(4) . . ?
C7 O4 C6 115.3(4) . . ?
C3 N1 O1 110.0(4) . . ?
C3 C1 C4 113.4(3) . . ?
C3 C1 C2 100.9(3) . . ?
C4 C1 C2 112.4(3) . . ?
C3 C1 H1 109.9 . . ?
C4 C1 H1 109.9 . . ?
C2 C1 H1 109.9 . . ?
O1 C2 C6 109.5(4) . . ?
O1 C2 C1 105.5(3) . . ?
C6 C2 C1 115.1(4) . . ?
O1 C2 H2 108.8 . . ?
C6 C2 H2 108.8 . . ?
C1 C2 H2 108.8 . . ?
N1 C3 C1 114.2(4) . . ?
N1 C3 C14 121.5(4) . . ?
C1 C3 C14 124.2(4) . . ?
O2 C4 O3 125.1(4) . . ?
O2 C4 C1 125.1(4) . . ?
O3 C4 C1 109.8(4) . . ?
O3 C5 H5A 109.5 . . ?
O3 C5 H5B 109.5 . . ?
H5A C5 H5B 109.5 . . ?
O3 C5 H5C 109.5 . . ?
H5A C5 H5C 109.5 . . ?
H5B C5 H5C 109.5 . . ?
O4 C6 C2 108.3(4) . . ?
O4 C6 H6A 110.0 . . ?
C2 C6 H6A 110.0 . . ?
O4 C6 H6B 110.0 . . ?
C2 C6 H6B 110.0 . . ?
H6A C6 H6B 108.4 . . ?
O5 C7 O4 122.7(5) . . ?
O5 C7 C8 124.1(5) . . ?
O4 C7 C8 113.3(4) . . ?
C9 C8 C13 120.0(5) . . ?
C9 C8 C7 118.4(5) . . ?
C13 C8 C7 121.6(5) . . ?
C10 C9 C8 120.4(5) . . ?
C10 C9 H9 119.8 . . ?
C8 C9 H9 119.8 . . ?
C9 C10 C11 119.1(5) . . ?
C9 C10 H10 120.5 . . ?
C11 C10 H10 120.5 . . ?
C12 C11 C10 121.5(6) . . ?
C12 C11 Br1 119.2(5) . . ?
C10 C11 Br1 119.3(5) . . ?
C11 C12 C13 119.4(6) . . ?
C11 C12 H12 120.3 . . ?
C13 C12 H12 120.3 . . ?
C12 C13 C8 119.6(5) . . ?
C12 C13 H13 120.2 . . ?
C8 C13 H13 120.2 . . ?
C3 C14 H14A 109.5 . . ?
C3 C14 H14B 109.5 . . ?
H14A C14 H14B 109.5 . . ?
C3 C14 H14C 109.5 . . ?
H14A C14 H14C 109.5 . . ?
H14B C14 H14C 109.5 . . ?
N1A O1A C2A 108.6(4) . . ?
C4A O3A C5A 116.8(4) . . ?
C7A O4A C6A 116.4(4) . . ?
C3A N1A O1A 109.8(4) . . ?
C3A C1A C4A 108.1(3) . . ?
C3A C1A C2A 100.4(3) . . ?
C4A C1A C2A 114.5(4) . . ?
C3A C1A H1A 111.1 . . ?
C4A C1A H1A 111.1 . . ?
C2A C1A H1A 111.1 . . ?
O1A C2A C6A 108.3(4) . . ?
O1A C2A C1A 104.7(4) . . ?
C6A C2A C1A 111.8(4) . . ?
O1A C2A H2A 110.6 . . ?
C6A C2A H2A 110.6 . . ?
C1A C2A H2A 110.6 . . ?
N1A C3A C14A 122.1(5) . . ?
N1A C3A C1A 114.1(4) . . ?
C14A C3A C1A 123.7(4) . . ?
O2A C4A O3A 124.7(4) . . ?
O2A C4A C1A 125.3(4) . . ?
O3A C4A C1A 109.9(4) . . ?
O3A C5A H5AA 109.5 . . ?
O3A C5A H5AB 109.5 . . ?
H5AA C5A H5AB 109.5 . . ?
O3A C5A H5AC 109.5 . . ?
H5AA C5A H5AC 109.5 . . ?
H5AB C5A H5AC 109.5 . . ?
O4A C6A C2A 106.4(4) . . ?
O4A C6A H6AA 110.5 . . ?
C2A C6A H6AA 110.5 . . ?
O4A C6A H6AB 110.5 . . ?
C2A C6A H6AB 110.5 . . ?
H6AA C6A H6AB 108.6 . . ?
O5A C7A O4A 123.8(5) . . ?
O5A C7A C8A 125.2(5) . . ?
O4A C7A C8A 111.1(4) . . ?
C13A C8A C9A 119.2(5) . . ?
C13A C8A C7A 122.3(5) . . ?
C9A C8A C7A 118.6(5) . . ?
C10A C9A C8A 120.5(5) . . ?
C10A C9A H9A 119.7 . . ?
C8A C9A H9A 119.7 . . ?
C11A C10A C9A 118.5(5) . . ?
C11A C10A H10A 120.8 . . ?
C9A C10A H10A 120.8 . . ?
C10A C11A C12A 122.2(5) . . ?
C10A C11A Br1A 119.4(4) . . ?
C12A C11A Br1A 118.3(5) . . ?
C13A C12A C11A 118.5(5) . . ?
C13A C12A H12A 120.8 . . ?
C11A C12A H12A 120.8 . . ?
C12A C13A C8A 121.1(5) . . ?
C12A C13A H13A 119.4 . . ?
C8A C13A H13A 119.4 . . ?
C3A C14A H14D 109.5 . . ?
C3A C14A H14E 109.5 . . ?
H14D C14A H14E 109.5 . . ?
C3A C14A H14F 109.5 . . ?
H14D C14A H14F 109.5 . . ?
H14E C14A H14F 109.5 . . ?
 
loop_
 _geom_torsion_atom_site_label_1
 _geom_torsion_atom_site_label_2
 _geom_torsion_atom_site_label_3
 _geom_torsion_atom_site_label_4
 _geom_torsion
 _geom_torsion_site_symmetry_1
 _geom_torsion_site_symmetry_2
 _geom_torsion_site_symmetry_3
 _geom_torsion_site_symmetry_4
 _geom_torsion_publ_flag
C2 O1 N1 C3 -2.1(5) . . . . ?
N1 O1 C2 C6 -120.3(4) . . . . ?
N1 O1 C2 C1 4.1(4) . . . . ?
C3 C1 C2 O1 -4.3(4) . . . . ?
C4 C1 C2 O1 116.7(4) . . . . ?
C3 C1 C2 C6 116.5(4) . . . . ?
C4 C1 C2 C6 -122.4(4) . . . . ?
O1 N1 C3 C1 -1.1(5) . . . . ?
O1 N1 C3 C14 177.3(4) . . . . ?
C4 C1 C3 N1 -116.9(4) . . . . ?
C2 C1 C3 N1 3.5(5) . . . . ?
C4 C1 C3 C14 64.7(5) . . . . ?
C2 C1 C3 C14 -174.9(4) . . . . ?
C5 O3 C4 O2 -3.7(6) . . . . ?
C5 O3 C4 C1 177.1(4) . . . . ?
C3 C1 C4 O2 9.0(6) . . . . ?
C2 C1 C4 O2 -104.6(5) . . . . ?
C3 C1 C4 O3 -171.8(3) . . . . ?
C2 C1 C4 O3 74.6(4) . . . . ?
C7 O4 C6 C2 172.7(4) . . . . ?
O1 C2 C6 O4 74.1(5) . . . . ?
C1 C2 C6 O4 -44.6(5) . . . . ?
C6 O4 C7 O5 2.4(7) . . . . ?
C6 O4 C7 C8 -176.8(4) . . . . ?
O5 C7 C8 C9 4.9(8) . . . . ?
O4 C7 C8 C9 -175.9(5) . . . . ?
O5 C7 C8 C13 -173.9(5) . . . . ?
O4 C7 C8 C13 5.3(7) . . . . ?
C13 C8 C9 C10 -0.6(9) . . . . ?
C7 C8 C9 C10 -179.4(5) . . . . ?
C8 C9 C10 C11 0.5(9) . . . . ?
C9 C10 C11 C12 0.2(9) . . . . ?
C9 C10 C11 Br1 -180.0(4) . . . . ?
C10 C11 C12 C13 -0.9(9) . . . . ?
Br1 C11 C12 C13 179.3(4) . . . . ?
C11 C12 C13 C8 0.8(9) . . . . ?
C9 C8 C13 C12 0.0(8) . . . . ?
C7 C8 C13 C12 178.7(5) . . . . ?
C2A O1A N1A C3A -9.9(5) . . . . ?
N1A O1A C2A C6A -104.1(4) . . . . ?
N1A O1A C2A C1A 15.3(5) . . . . ?
C3A C1A C2A O1A -14.2(4) . . . . ?
C4A C1A C2A O1A 101.3(4) . . . . ?
C3A C1A C2A C6A 102.8(4) . . . . ?
C4A C1A C2A C6A -141.7(4) . . . . ?
O1A N1A C3A C14A -176.8(4) . . . . ?
O1A N1A C3A C1A -0.2(5) . . . . ?
C4A C1A C3A N1A -110.8(4) . . . . ?
C2A C1A C3A N1A 9.4(5) . . . . ?
C4A C1A C3A C14A 65.7(6) . . . . ?
C2A C1A C3A C14A -174.1(4) . . . . ?
C5A O3A C4A O2A -1.6(7) . . . . ?
C5A O3A C4A C1A 175.0(4) . . . . ?
C3A C1A C4A O2A 88.4(5) . . . . ?
C2A C1A C4A O2A -22.6(6) . . . . ?
C3A C1A C4A O3A -88.2(4) . . . . ?
C2A C1A C4A O3A 160.9(4) . . . . ?
C7A O4A C6A C2A -179.9(4) . . . . ?
O1A C2A C6A O4A -64.6(5) . . . . ?
C1A C2A C6A O4A -179.4(4) . . . . ?
C6A O4A C7A O5A 0.6(8) . . . . ?
C6A O4A C7A C8A -178.9(4) . . . . ?
O5A C7A C8A C13A 178.1(6) . . . . ?
O4A C7A C8A C13A -2.4(7) . . . . ?
O5A C7A C8A C9A -2.6(9) . . . . ?
O4A C7A C8A C9A 176.9(5) . . . . ?
C13A C8A C9A C10A 0.6(8) . . . . ?
C7A C8A C9A C10A -178.8(5) . . . . ?
C8A C9A C10A C11A -0.5(8) . . . . ?
C9A C10A C11A C12A 0.6(9) . . . . ?
C9A C10A C11A Br1A -179.8(4) . . . . ?
C10A C11A C12A C13A -0.9(9) . . . . ?
Br1A C11A C12A C13A 179.6(4) . . . . ?
C11A C12A C13A C8A 1.0(9) . . . . ?
C9A C8A C13A C12A -0.9(8) . . . . ?
C7A C8A C13A C12A 178.5(5) . . . . ?
 
_refine_diff_density_max    0.337
_refine_diff_density_min   -0.312
_refine_diff_density_rms    0.048

_shelxl_version_number 2014/6

_shelx_res_file
;
TITL A in P1
CELL 0.71073 8.3664 9.5599 11.0049 113.946 107.506 92.316
ZERR 2 0.0021 0.0022 0.002 0.009 0.011 0.013
LATT -1
SFAC C H Br N O
UNIT 28 28 2 2 10

L.S. 4
PLAN 5
fmap 2

BOND $H
ACTA
CONF

temp -100
size 0.19 0.19 0.08

omit      1   0   0
omit      0   1  -1
omit      0   0   1
omit     -1   0   0
omit      0   0  -1
omit      0  -1   1
omit     -1   0   1
omit      0   1   0

WGHT    0.022100    0.123700
FVAR       1.01858
BR1   3   -0.087083    0.477018    0.189539    11.00000    0.07337    0.04713 =
         0.07601    0.03848    0.02309    0.03267
O1    5    0.403130   -0.213810    0.494542    11.00000    0.03446    0.03775 =
         0.03996    0.02063    0.01467    0.00274
O2    5    0.889234   -0.010245    0.673874    11.00000    0.03283    0.05804 =
         0.03225    0.02241    0.00610    0.01408
O3    5    0.862997   -0.073863    0.447959    11.00000    0.02699    0.04592 =
         0.03649    0.02287    0.01607    0.01368
O4    5    0.311936   -0.099726    0.275790    11.00000    0.03279    0.02670 =
         0.02335    0.01023    0.00595    0.01106
O5    5    0.206203   -0.212810    0.038836    11.00000    0.05120    0.03269 =
         0.02684    0.00796    0.00857    0.01273
N1    4    0.432270   -0.069755    0.615316    11.00000    0.02915    0.04082 =
         0.03036    0.01710    0.01062    0.00790
C1    1    0.615627   -0.034462    0.503637    11.00000    0.02123    0.02777 =
         0.02775    0.01573    0.00712    0.00698
AFIX  13
H1    2    0.592461    0.026699    0.447013    11.00000   -1.20000
AFIX   0
C2    1    0.506996   -0.198890    0.415482    11.00000    0.02607    0.02888 =
         0.03339    0.01650    0.01297    0.00887
AFIX  13
H2    2    0.584246   -0.276709    0.409286    11.00000   -1.20000
AFIX   0
C3    1    0.544951    0.028208    0.620735    11.00000    0.02497    0.03187 =
         0.03010    0.01502    0.00930    0.00988
C4    1    0.805023   -0.036480    0.555061    11.00000    0.02519    0.02576 =
         0.03635    0.01542    0.01407    0.00665
C5    1    1.044521   -0.073829    0.480461    11.00000    0.02940    0.05340 =
         0.05972    0.03038    0.02593    0.01736
AFIX 137
H5A   2    1.070393   -0.110774    0.392650    11.00000   -1.50000
H5B   2    1.077355   -0.142897    0.525825    11.00000   -1.50000
H5C   2    1.108356    0.032207    0.544848    11.00000   -1.50000
AFIX   0
C6    1    0.394566   -0.231937    0.268237    11.00000    0.03099    0.02433 =
         0.03248    0.01268    0.01007    0.01360
AFIX  23
H6A   2    0.463650   -0.248517    0.206324    11.00000   -1.20000
H6B   2    0.307775   -0.327324    0.227986    11.00000   -1.20000
AFIX   0
C7    1    0.222446   -0.104068    0.150838    11.00000    0.02364    0.03005 =
         0.02462    0.01212    0.00409    0.00152
C8    1    0.148365    0.037486    0.164041    11.00000    0.02802    0.02687 =
         0.02520    0.01311    0.00638    0.00681
C9    1    0.043680    0.041803    0.041585    11.00000    0.03712    0.03574 =
         0.02669    0.01218    0.00674    0.00685
AFIX  43
H9    2    0.020332   -0.045174   -0.047647    11.00000   -1.20000
AFIX   0
C10   1   -0.026869    0.171850    0.048580    11.00000    0.04283    0.04698 =
         0.03495    0.02722    0.00739    0.01505
AFIX  43
H10   2   -0.099355    0.174589   -0.035168    11.00000   -1.20000
AFIX   0
C11   1    0.009506    0.298050    0.179246    11.00000    0.04272    0.03103 =
         0.04811    0.02290    0.01754    0.01457
C12   1    0.114625    0.296996    0.301991    11.00000    0.05213    0.03343 =
         0.03579    0.01687    0.01509    0.01179
AFIX  43
H12   2    0.139356    0.385305    0.390588    11.00000   -1.20000
AFIX   0
C13   1    0.184342    0.165421    0.295139    11.00000    0.03855    0.02878 =
         0.02922    0.01507    0.00852    0.01035
AFIX  43
H13   2    0.255968    0.162780    0.379219    11.00000   -1.20000
AFIX   0
C14   1    0.595682    0.192784    0.734239    11.00000    0.04079    0.04106 =
         0.03265    0.01315    0.01531    0.01336
AFIX 137
H14A  2    0.550774    0.262882    0.693032    11.00000   -1.50000
H14B  2    0.720375    0.221246    0.775600    11.00000   -1.50000
H14C  2    0.549059    0.201806    0.808280    11.00000   -1.50000
AFIX   0

BR1A  3    0.744060   -0.270013    1.055135    11.00000    0.06535    0.04539 =
         0.06133    0.03486    0.03023    0.03329
O1A   5    0.241598    0.327659    0.701595    11.00000    0.04478    0.05215 =
         0.03531    0.02498    0.01899    0.02598
O2A   5   -0.196911    0.291151    0.556193    11.00000    0.03912    0.02869 =
         0.04331    0.01322   -0.00686   -0.00343
O3A   5   -0.229324    0.536929    0.666138    11.00000    0.03554    0.04732 =
         0.04470    0.02442    0.01376    0.01972
O4A   5    0.311730    0.275974    0.943478    11.00000    0.04119    0.02749 =
         0.02587    0.01411    0.00594    0.01520
O5A   5    0.437277    0.414986    1.179452    11.00000    0.05502    0.03744 =
         0.02720    0.01070    0.00642    0.01870
N1A   4    0.257405    0.454883    0.667762    11.00000    0.03156    0.05730 =
         0.03914    0.02684    0.00882    0.00791
C1A   1    0.036103    0.479569    0.757755    11.00000    0.02889    0.02627 =
         0.02475    0.01251    0.00933    0.00641
AFIX  13
H1A   2    0.037112    0.563542    0.849481    11.00000   -1.20000
AFIX   0
C2A   1    0.126596    0.352515    0.781243    11.00000    0.02888    0.02937 =
         0.02716    0.01350    0.00819    0.00977
AFIX  13
H2A   2    0.042526    0.254820    0.744561    11.00000   -1.20000
AFIX   0
C3A   1    0.148646    0.537781    0.697366    11.00000    0.02832    0.03616 =
         0.02747    0.01567    0.00409   -0.00210
C4A   1   -0.143341    0.420704    0.648601    11.00000    0.02476    0.03666 =
         0.03433    0.02336    0.01186    0.00908
C5A   1   -0.398687    0.503097    0.562564    11.00000    0.03294    0.08006 =
         0.07566    0.05647    0.01564    0.02640
AFIX 137
H5AA  2   -0.390731    0.471292    0.468288    11.00000   -1.50000
H5AB  2   -0.450139    0.596465    0.587266    11.00000   -1.50000
H5AC  2   -0.469628    0.418673    0.562156    11.00000   -1.50000
AFIX   0
C6A   1    0.232146    0.404805    0.935798    11.00000    0.04030    0.02701 =
         0.02812    0.01204    0.00975    0.01110
AFIX  23
H6AA  2    0.319783    0.497955    0.970285    11.00000   -1.20000
H6AB  2    0.158555    0.430923    0.994536    11.00000   -1.20000
AFIX   0
C7A   1    0.412720    0.297473    1.073268    11.00000    0.03485    0.02922 =
         0.03058    0.01558    0.01316    0.01059
C8A   1    0.489784    0.157030    1.066184    11.00000    0.03016    0.03355 =
         0.02469    0.01726    0.01230    0.00989
C9A   1    0.604724    0.162461    1.190668    11.00000    0.04376    0.04028 =
         0.02559    0.01830    0.01322    0.01662
AFIX  43
H9A   2    0.630416    0.253443    1.277501    11.00000   -1.20000
AFIX   0
C10A  1    0.681556    0.036292    1.188560    11.00000    0.04044    0.04637 =
         0.03418    0.02597    0.01282    0.01860
AFIX  43
H10A  2    0.760440    0.039841    1.272914    11.00000   -1.20000
AFIX   0
C11A  1    0.640944   -0.094548    1.061262    11.00000    0.04028    0.04104 =
         0.04310    0.02998    0.02322    0.01991
C12A  1    0.527966   -0.102990    0.936421    11.00000    0.04366    0.03118 =
         0.03268    0.01145    0.01261    0.01392
AFIX  43
H12A  2    0.503081   -0.193875    0.849640    11.00000   -1.20000
AFIX   0
C13A  1    0.452302    0.023416    0.940751    11.00000    0.03735    0.03834 =
         0.02737    0.01753    0.00930    0.00949
AFIX  43
H13A  2    0.372969    0.018719    0.856070    11.00000   -1.20000
AFIX   0
C14A  1    0.128257    0.676173    0.666397    11.00000    0.04307    0.04982 =
         0.06649    0.03990    0.01005    0.00337
AFIX 137
H14D  2    0.133201    0.767176    0.752471    11.00000   -1.50000
H14E  2    0.017950    0.654675    0.591739    11.00000   -1.50000
H14F  2    0.220282    0.697187    0.634726    11.00000   -1.50000
AFIX   0
HKLF 4

REM  A in P1
REM R1 =  0.0390 for    6054 Fo > 4sig(Fo)  and  0.0457 for all    6757 data
REM    383 parameters refined using      3 restraints

END

WGHT      0.0219      0.1256

REM Highest difference peak  0.337,  deepest hole -0.312,  1-sigma level  0.048
Q1    1   0.1698  0.1012  0.2195  11.00000  0.05    0.24
Q2    1   0.1965 -0.0214  0.1610  11.00000  0.05    0.24
Q3    1   0.4604  0.2233  1.0770  11.00000  0.05    0.24
Q4    1   0.5455  0.1674  1.1236  11.00000  0.05    0.22
Q5    1   0.4812  0.0933  1.0180  11.00000  0.05    0.22
;
_shelx_res_checksum   34084

_shelx_hkl_file
;
   0   0   1   -0.22    0.38
   0   0  -1    1.32    0.59
   0   0   1   -0.27    0.48
   0   0  -1    1.33    0.74
   0   0   1   -1.13    0.78
   0   0   2 9999.98  459.98
   0   0   3  101.32    4.83
   0   0   3  105.44    4.49
   0   0   3  103.57    4.01
   0   0   3   98.88   10.20
   0   0   3  108.66    5.93
   0   0   4  927.22   43.23
   0   0   4  929.07   43.28
   0   0  -4  999.87   13.70
   0   0   4  982.82   13.53
   0   0  -4  978.54   13.99
   0   0   4  912.36   25.65
   0   0   4  911.08   25.47
   0   0   4  996.16   15.54
   0   0   5  441.67   20.95
   0   0   5  483.41   23.11
   0   0  -5  354.95   17.70
   0   0   5  454.52   21.77
   0   0  -5  351.86   17.70
   0   0   5  427.72   20.80
   0   0   5  433.97   21.09
   0   0   5  438.65   22.02
   0   0   6  435.97   31.93
   0   0   6  461.01   33.81
   0   0  -6  506.88   16.44
   0   0   6  466.23   34.07
   0   0  -6  520.31   18.89
   0   0   6  495.31   41.54
   0   0   7  796.92   28.01
   0   0   7  874.13   31.08
   0   0  -7  907.40   32.24
   0   0   7  794.98   28.26
   0   0  -7  869.37   34.04
   0   0   7  931.89   34.36
   0   0   8 1172.38   43.10
   0   0   8 1435.71   53.12
   0   0  -8 1468.16   56.53
   0   0  -8 1546.81   58.12
   0   0   8 1368.99   52.31
   0   0   9  481.64   29.66
   0   0  -9  469.97   29.05
   0   0  -9  498.63   31.76
   0   0   9  457.50   29.75
   0   0  10  138.64    7.16
   0   0 -10  163.84    8.36
   0   0 -10  168.33   10.03
   0   0  10  150.24   10.06
   0   0 -11    6.74    2.24
   0   0 -11    8.83    4.48
   0   0  11    4.87    4.44
   0   0  12    9.97    5.58
   0   0  12   18.63    6.97
   0   1 -12    7.08    4.19
   0  -1  12    8.66    4.96
   0   1 -11   78.38    6.50
   0   1 -11   95.56   10.20
   0  -1  11   93.44    9.28
   0  -1  10   23.39    5.27
   0   1 -10   15.34    5.56
   0   1 -10   34.48    8.28
   0  -1  10   14.21    5.88
   0  -1   9  212.32   22.13
   0  -1   9  258.96   10.29
   0   1  -9  292.14   11.88
   0   1  -9  285.52   12.74
   0  -1   9  269.89   13.39
   0  -1   8   43.23    8.06
   0  -1   8   60.23    6.89
   0   1  -8   36.20    6.73
   0  -1   8   44.60    5.28
   0   1  -8   39.70    7.15
   0  -1   8   75.41   11.20
   0  -1   7   45.41    6.94
   0  -1   7   50.15    5.48
   0   1  -7   38.33    6.26
   0  -1   7   53.30    5.32
   0   1  -7   39.47    7.80
   0  -1   7   53.31    7.35
   0  -1   6 1002.63   26.42
   0  -1   6 1031.13   27.49
   0   1  -6  982.17   26.31
   0  -1   6 1021.72   27.41
   0   1  -6 1026.60   29.75
   0  -1   6 1091.60   31.04
   0  -1   5 3713.02   68.10
   0  -1   5 3749.29   69.05
   0   1  -5 3939.08   72.70
   0  -1   5 3706.46   68.51
   0  -1   5 3523.19   65.77
   0  -1   5 3906.08   73.49
   0  -1   4 1423.74   17.88
   0   1  -4 1592.40   19.49
   0  -1   4 1406.38   17.80
   0  -1   4 1417.50   18.81
   0  -1   4 1424.13   18.90
   0  -1   4 1474.60   20.41
   0  -1   3  800.10   21.96
   0   1  -3  645.38   17.73
   0   1  -3  687.41   19.03
   0  -1   3  834.68   22.86
   0   1  -3  673.61   19.10
   0  -1   3  831.02   23.07
   0  -1   3  815.73   23.59
   0  -1   2 3315.68   38.11
   0  -1   2 3331.69   38.42
   0   1  -2 3442.53   40.26
   0  -1   2 3234.89   37.85
   0  -1   2 3323.36   39.11
   0  -1   1    0.53    0.82
   0   1  -1    0.06    0.90
   0   1  -1   -1.52    0.95
   0  -1   0   -0.54    0.83
   0   1   0   -1.81    1.06
   0  -1   0    2.12    1.01
   0   1   0    0.47    0.74
   0   1   0    6.21    0.52
   0  -1  -1  160.48    5.19
   0   1   1  172.79    5.65
   0   1   1  182.81    5.81
   0   1   1  170.30    5.08
   0   1   1  167.51    5.18
   0   1   1  174.21    5.16
   0  -1  -2 7525.23   86.23
   0  -1  -2 7518.32   86.05
   0   1   2 7213.72   82.59
   0  -1  -3  935.42   44.24
   0   1   3  916.51   25.14
   0  -1  -3  956.87   13.63
   0   1   3  908.82   26.52
   0  -1  -3  969.59   13.66
   0   1   3  884.53   24.42
   0  -1  -3 1006.00   13.83
   0   1   3  887.27   24.53
   0  -1  -4  948.64   18.96
   0   1   4  926.01   18.35
   0  -1  -4  946.61   19.35
   0   1   4  917.20   18.73
   0  -1  -4  955.24   19.54
   0   1   4  885.27   18.28
   0   1   4  889.37   17.87
   0   1   4  976.54   20.78
   0   1   5  649.87   17.73
   0   1   5  689.13   19.27
   0  -1  -5  755.16   21.18
   0   1   5  616.18   17.47
   0  -1  -5  749.60   21.96
   0   1   5  606.33   17.61
   0   1   5  692.56   20.30
   0   1   6   77.69   10.02
   0   1   6  101.03    8.68
   0  -1  -6  136.47   11.51
   0   1   6   95.18    7.74
   0  -1  -6  122.54   10.17
   0   1   6  111.98   10.81
   0   1   7   82.40    8.34
   0   1   7   95.24   10.50
   0  -1  -7   64.53    7.72
   0  -1  -7   65.82    7.92
   0   1   7   80.04   10.02
   0   1   8   97.13   10.40
   0   1   8  111.18   12.53
   0  -1  -8  181.37   19.56
   0  -1  -8  182.42   20.04
   0   1   8  112.73   13.62
   0   1   9  105.69   12.00
   0  -1  -9   89.29   10.47
   0   1   9  109.72   13.90
   0   1   9   90.53   10.97
   0  -1 -10   67.30   11.98
   0   1  10   70.17   13.77
   0   1  10   78.70    9.22
   0   1  11   16.35    6.57
   0   1  11   10.44    4.19
   0   2 -13    9.44    5.88
   0  -2  13   21.27    9.64
   0   2 -12   63.02   15.09
   0  -2  12  121.32   14.29
   0   2 -11   68.44   13.65
   0   2 -11   82.33   15.31
   0  -2  11   76.73   12.16
   0  -2  10   71.34    8.03
   0   2 -10   62.48   11.09
   0   2 -10   89.00   16.38
   0  -2  10   60.27    9.99
   0  -2   9  110.22   16.92
   0  -2   9  148.88   20.62
   0   2  -9  157.92   21.83
   0  -2   9  127.40   17.73
   0   2  -9  169.11   30.12
   0  -2   9  177.54   26.55
   0  -2   8   13.70    2.90
   0  -2   8   27.03    4.01
   0   2  -8   26.18    4.73
   0  -2   8   15.51    2.80
   0   2  -8   29.22    6.63
   0  -2   8    3.56    5.74
   0  -2   7    8.48    2.50
   0   2  -7    9.54    2.76
   0  -2   7    7.19    1.67
   0   2  -7   11.35    3.09
   0  -2   7   18.86    7.86
   0  -2   6 1923.83   49.82
   0   2  -6 2016.88   52.04
   0   2  -6 2164.19   56.08
   0  -2   6 1963.35   51.02
   0  -2   5 1833.91   34.38
   0   2  -5 1795.43   33.63
   0   2  -5 1841.03   34.77
   0  -2   5 1875.65   35.41
   0   2  -5 1893.19   36.72
   0  -2   5 1752.25   33.83
   0  -2   5 1888.83   37.50
   0   2  -5 1781.24   35.01
   0  -2   4 4226.28   49.19
   0   2  -4 4384.55   50.92
   0   2  -4 4516.62   52.75
   0  -2   4 4232.58   49.49
   0  -2   4 4035.33   48.15
   0  -2   4 4196.24   50.76
   0   2  -3 4984.26   57.48
   0   2  -3 5237.88   60.56
   0  -2   3 5371.29   62.03
   0   2  -3 5185.48   60.76
   0   2  -3 5016.08   58.84
   0   2  -1 2683.48   31.73
   0   2  -1 2698.70   32.15
   0  -2   1 2910.49   34.36
   0   2  -1 2691.63   31.66
   0   2  -1 2612.37   30.61
   0   2   0 3035.73   35.85
   0   2   0 3185.26   38.00
   0   2   0 3153.22   36.74
   0  -2   0 3079.07   35.84
   0  -2   0 3127.55   36.09
   0  -2  -1  748.46   21.08
   0   2   1  888.81   24.61
   0   2   1  868.76   24.13
   0   2   1  861.47   24.27
   0   2   1  920.02   25.38
   0  -2  -1  731.55   20.11
   0  -2  -1  743.19   20.23
   0   2   1  924.22   42.78
   0  -2  -2 1979.07   24.86
   0   2   2 1802.96   22.62
   0   2   2 1828.42   22.32
   0   2   2 1883.11   23.41
   0  -2  -2 1929.92   23.23
   0   2   2 1846.26   22.46
   0  -2  -3 1676.25   32.18
   0   2   3 1659.22   31.68
   0  -2  -3 1797.48   34.71
   0   2   3 1625.05   32.34
   0   2   3 1629.26   30.90
   0   2   3 1695.88   32.85
   0  -2  -3 1780.60   33.70
   0   2   3 1666.25   31.64
   0  -2  -4 3609.92   93.41
   0   2   4 3319.05   85.43
   0  -2  -4 3728.45   96.28
   0   2   4 3210.30   82.94
   0   2   4 3491.41   90.16
   0   2   4 3225.34   83.00
   0  -2  -5  311.21   23.26
   0   2   5  310.81   23.00
   0  -2  -5  329.98   24.77
   0   2   5  283.00   21.06
   0   2   5  305.93   23.52
   0   2   5  312.50   23.18
   0   2   5  341.76   25.49
   0  -2  -6  174.46   14.21
   0   2   6  161.77   13.94
   0   2   6  165.79   13.71
   0   2   7    2.26    3.37
   0  -2  -7    0.17    2.88
   0   2   7   19.68    6.62
   0   2   7   14.42    6.21
   0   2   8   19.24    5.67
   0  -2  -8   19.53    4.72
   0   2   8   31.56    9.49
   0   2   8   19.51    5.42
   0   2   9   57.68    8.75
   0   2   9   43.50    7.40
   0   2   9   67.40   10.66
   0   2   9   72.89   11.02
   0   2  10   12.03    3.70
   0   2  10   18.16    8.64
   0   2  11    7.55    4.81
   0   2  11   15.42    6.72
   0   3 -13   79.01   15.55
   0  -3  13  101.71   10.26
   0   3 -12    8.75    3.21
   0  -3  12    6.65    5.29
   0   3 -11   15.07    4.31
   0   3 -11   27.67    7.49
   0  -3  11   17.38    7.01
   0  -3  10  115.11    9.92
   0   3 -10   99.57   13.87
   0   3 -10  108.39   18.34
   0  -3  10  124.15   15.59
   0  -3   9  315.14   15.84
   0  -3   9  368.27   18.69
   0   3  -9  351.75   18.09
   0  -3   9  325.58   17.00
   0   3  -9  361.43   21.88
   0  -3   9  424.52   26.01
   0  -3   8  200.31   15.34
   0   3  -8  217.12   16.40
   0   3  -8  249.19   18.94
   0  -3   8  185.13   14.33
   0   3  -8  270.35   31.23
   0  -3   8  190.67   18.37
   0  -3   7  431.23   31.46
   0   3  -7  397.75   29.02
   0   3  -7  452.37   33.09
   0  -3   7  414.69   30.33
   0   3  -7  424.21   37.63
   0  -3   7  428.00   33.03
   0  -3   6  689.48   18.99
   0   3  -6  723.06   19.62
   0   3  -6  725.29   19.94
   0  -3   6  674.57   18.75
   0   3  -6  732.41   21.33
   0  -3   6  711.45   22.23
   0  -3   5  385.22   18.65
   0   3  -5  349.05   16.94
   0   3  -5  356.22   17.43
   0  -3   5  343.04   16.81
   0   3  -5  361.09   18.07
   0  -3   5  358.93   18.50
   0   3  -5  329.06   16.81
   0   3  -4  218.69    7.09
   0   3  -4  210.38    7.30
   0  -3   4  303.01    9.97
   0   3  -4  227.36    8.40
   0  -3   4  300.09   10.53
   0   3  -4  220.72    9.31
   0   3  -3 1968.37   24.30
   0   3  -3 1993.54   25.24
   0  -3   3 1723.09   22.13
   0   3  -3 1944.30   24.75
   0  -3   3 1766.27   23.08
   0   3  -3 1899.03   24.09
   0  -3   2 3316.06   39.64
   0   3  -2 3014.52   36.69
   0  -3   2 3105.18   37.28
   0   3  -2 3051.83   36.66
   0  -3   2 3226.83   38.46
   0  -3   2 3442.35   40.97
   0  -3   1 5830.31   68.01
   0   3  -1 5898.59   69.07
   0  -3   1 5632.13   65.84
   0  -3   1 5712.01   66.08
   0  -3   1 5796.02   66.84
   0   3  -1 5842.91   67.31
   0  -3   0  540.21   15.82
   0   3   0  514.83   15.00
   0   3   0  516.68   15.86
   0   3   0  526.90   15.05
   0  -3   0  506.19   14.52
   0  -3   0  526.57   14.78
   0   3   0  518.80   14.64
   0  -3  -1  890.33   25.14
   0   3   1  863.14   24.29
   0   3   1  901.20   25.19
   0   3   1  925.53   43.86
   0   3   1  904.58   25.20
   0  -3  -1  903.72   24.89
   0  -3  -1  898.35   24.45
   0   3   1  892.41   24.30
   0  -3  -2    2.73    2.28
   0   3   2    9.51    3.15
   0   3   2    5.55    1.80
   0   3   2    8.90    6.14
   0   3   2    5.16    1.32
   0   3   2    6.62    4.28
   0  -3  -2    4.96    1.72
   0   3   2    3.40    1.70
   0  -3  -3    5.13    2.77
   0   3   3   14.18    2.57
   0   3   3   20.03    3.52
   0   3   3   10.94    4.78
   0   3   3   12.45    1.80
   0   3   3   13.92    3.26
   0  -3  -3    2.32    1.35
   0   3   3   17.30    1.99
   0  -3  -4  220.62   16.93
   0   3   4  219.59   17.86
   0   3   4  231.06   17.31
   0   3   4  261.19   20.20
   0  -3  -4  224.87   16.93
   0   3   4  243.58   18.15
   0  -3  -5  489.69   20.42
   0   3   5  445.10   19.53
   0   3   5  481.18   20.91
   0   3   5  431.86   17.76
   0   3   5  488.00   20.84
   0  -3  -6  274.77   12.11
   0   3   6  249.19   12.88
   0   3   6  270.56   13.29
   0   3   6  262.68   12.39
   0   3   7  286.77   18.71
   0   3   7  289.56   19.61
   0   3   7  311.58   20.90
   0   3   7  313.64   20.09
   0   3   8   50.38    9.33
   0   3   8   48.74    8.60
   0   3   8   58.41   10.31
   0   3   8   40.83    7.45
   0   3   9   -0.12    3.35
   0   3   9    2.42    3.26
   0   3   9    8.89    4.67
   0   3   9    5.38    3.37
   0   3  10    2.45    3.41
   0   3  10   22.99    7.67
   0  -4  13   12.97    6.27
   0   4 -12   18.94    7.16
   0  -4  12    6.49    5.38
   0   4 -11   45.03   11.92
   0   4 -11   86.20   19.23
   0  -4  11   55.96   11.97
   0   4 -10  126.81   11.19
   0   4 -10  131.28   17.55
   0  -4  10  129.84   14.28
   0  -4   9  142.30   19.58
   0   4  -9   92.74   19.86
   0   4  -9  102.37   14.65
   0  -4   9  127.96   17.95
   0   4  -9   94.59   20.66
   0  -4   9  154.65   24.27
   0  -4   8  506.54   20.57
   0   4  -8  514.48   20.89
   0   4  -8  535.21   21.85
   0  -4   8  434.39   18.04
   0   4  -8  536.89   23.23
   0  -4   8  467.63   22.41
   0  -4   7 1138.96   34.58
   0   4  -7  933.23   28.53
   0   4  -7  964.99   29.83
   0  -4   7 1071.02   32.79
   0   4  -7  991.18   31.60
   0  -4   7 1146.36   36.66
   0  -4   6  860.03   23.56
   0   4  -6 1022.72   27.39
   0   4  -6 1115.07   30.16
   0  -4   6  822.05   22.73
   0   4  -6 1077.03   35.42
   0  -4   6  873.85   25.77
   0   4  -5  285.54   14.21
   0   4  -5  296.76   15.06
   0  -4   5  372.10   18.45
   0   4  -5  303.63   15.88
   0  -4   4  220.49   11.50
   0   4  -4  269.17   13.32
   0   4  -4  259.50   13.63
   0  -4   4  239.57   12.25
   0   4  -4  277.76   14.08
   0  -4   4  226.81   11.83
   0  -4   3   39.37    3.13
   0   4  -3   26.93    3.27
   0   4  -3   31.84    4.66
   0  -4   3   41.61    4.51
   0  -4   3   42.79    3.33
   0  -4   3   47.31    4.41
   0   4  -3   18.08    2.27
   0  -4   2 1406.47   19.32
   0   4  -2 1447.44   19.36
   0  -4   2 1357.90   18.69
   0   4  -2 1539.06   20.24
   0  -4   2 1387.96   18.30
   0  -4   2 1417.79   18.89
   0   4  -2 1435.16   18.64
   0  -4   1  395.72   12.50
   0   4  -1  283.05   10.43
   0  -4   1  373.94   12.58
   0   4  -1  285.10    9.38
   0  -4   1  375.08   11.42
   0  -4   1  377.41   11.17
   0  -4   0 4008.44   74.84
   0   4   0 3828.09   71.20
   0   4   0 4162.80   77.96
   0   4   0 4075.10   75.21
   0  -4   0 3834.47   70.66
   0  -4   0 3999.28   73.36
   0   4   0 3999.77   73.36
   0   4   1  539.45   27.46
   0   4   1  570.83   27.33
   0  -4  -1  610.09   28.73
   0  -4  -1  641.48   30.02
   0   4   1  556.29   26.11
   0  -4  -2 1070.80   30.81
   0   4   2 1145.62   32.52
   0   4   2 1056.53   28.49
   0  -4  -2 1038.23   27.67
   0  -4  -2 1060.66   27.90
   0   4   2 1042.39   27.36
   0  -4  -3   53.85    6.70
   0   4   3   53.97    8.18
   0   4   3   33.62    6.56
   0   4   3   43.40    5.43
   0  -4  -3   45.98    7.51
   0   4   3   36.30    3.45
   0  -4  -4   13.10    4.60
   0   4   4   17.71    5.10
   0   4   4    4.21    0.98
   0   4   4   12.55    4.58
   0  -4  -4    8.69    3.18
   0   4   4    7.91    1.85
   0  -4  -5   66.87   11.09
   0   4   5   56.70    7.51
   0   4   5   82.42   10.88
   0   4   5   53.80    6.11
   0   4   5   59.42    7.22
   0  -4  -6  155.75   17.10
   0   4   6  139.82   16.79
   0   4   6  164.01   18.06
   0  -4  -7   65.28   10.30
   0   4   7   55.99    9.90
   0   4   7   53.58   10.18
   0   4   7   51.36    8.83
   0   4   8   16.64    4.86
   0   4   8   21.61    6.57
   0   4   8   16.87    5.22
   0   4   8   18.89    4.33
   0   4   9   13.32    5.49
   0   4   9   26.92    7.77
   0   5 -13   21.32    7.65
   0  -5  13   26.11    8.96
   0   5 -12  108.47   15.23
   0  -5  12  119.30   15.48
   0  -5  11   77.15   11.54
   0   5 -11   63.71    9.95
   0  -5  11   70.75   14.11
   0  -5  10   63.70   12.12
   0   5 -10   49.85   10.00
   0   5 -10   45.57   11.77
   0  -5  10   64.94   14.54
   0  -5   9   32.80    7.66
   0   5  -9   27.22    6.56
   0   5  -9   33.03    7.97
   0   5  -9   32.96    9.11
   0  -5   9   28.23    9.96
   0  -5   8  387.56   28.81
   0   5  -8  320.36   23.84
   0   5  -8  354.17   26.65
   0   5  -8  320.34   25.13
   0  -5   8  401.92   31.66
   0  -5   7  194.93   16.78
   0   5  -7  183.13   15.58
   0   5  -7  204.64   17.51
   0  -5   7  189.89   16.27
   0   5  -7  232.56   26.34
   0  -5   7  176.57   17.95
   0  -5   6  767.42   24.15
   0   5  -6  647.06   20.37
   0   5  -6  732.64   23.42
   0  -5   6  734.02   23.19
   0   5  -6  740.84   24.53
   0  -5   6  765.51   26.77
   0  -5   5 1953.85   51.35
   0   5  -5 1875.55   49.58
   0  -5   5 1850.62   48.72
   0   5  -5 1867.05   49.62
   0  -5   5 1939.73   51.64
   0  -5   4 1894.14   49.84
   0   5  -4 1793.21   47.00
   0   5  -4 1965.10   52.20
   0  -5   4 1626.02   42.85
   0   5  -4 1933.42   50.96
   0  -5   4 1946.39   51.79
   0   5  -4 1818.84   47.82
   0  -5   3 1281.69   25.88
   0   5  -3 1222.01   26.01
   0  -5   3 1211.02   24.54
   0   5  -3 1231.60   24.80
   0  -5   3 1251.32   25.19
   0  -5   3 1323.64   26.48
   0   5  -3 1169.43   23.35
   0  -5   2   26.38    4.46
   0   5  -2   29.72    3.57
   0  -5   2   28.21    3.64
   0  -5   2   28.38    3.14
   0   5  -2   43.25    4.35
   0  -5   1  414.30   24.25
   0   5  -1  410.21   25.46
   0   5  -1  408.11   23.45
   0  -5   1  468.43   26.65
   0  -5   1  485.25   27.43
   0   5  -1  400.49   22.74
   0  -5   0  882.73   25.04
   0   5   0  955.68   27.68
   0   5   0  989.57   26.91
   0  -5   0  814.08   22.13
   0  -5   0  865.57   23.17
   0   5   0  938.35   24.87
   0  -5  -1  454.11   35.13
   0   5   1  425.70   32.99
   0   5   1  381.26   28.26
   0  -5  -1  445.93   32.54
   0  -5  -1  474.52   34.36
   0   5   1  380.60   27.76
   0  -5  -2  785.37   28.92
   0   5   2  824.60   32.18
   0   5   2  829.12   29.65
   0  -5  -2  753.24   26.55
   0  -5  -2  772.15   26.88
   0   5   2  773.54   26.91
   0  -5  -3  417.58   41.34
   0   5   3  463.78   22.20
   0   5   3  385.13   28.38
   0   5   3  451.97   19.75
   0  -5  -3  397.58   29.45
   0   5   3  416.75   40.48
   0  -5  -4  370.52   20.03
   0   5   4  320.80   19.90
   0   5   4  293.00   16.56
   0  -5  -4  361.47   18.21
   0   5   4  292.13   14.99
   0  -5  -5  183.93   30.48
   0   5   5  195.51   22.46
   0   5   5  204.55   21.78
   0   5   5  212.89   22.16
   0  -5  -6   24.69    6.34
   0   5   6   31.62    8.62
   0   5   6   24.08    6.34
   0   5   6   34.80    6.34
   0  -5  -7   10.08    3.71
   0   5   7    1.41    4.57
   0   5   7   15.62    6.98
   0   5   8   36.05    8.53
   0   5   8   20.71    7.55
   0   5   8   33.95    7.49
   0  -6  13   18.37   10.16
   0   6 -12   74.25   14.31
   0  -6  12   79.70   10.95
   0  -6  11  154.03    6.87
   0   6 -11  115.67   20.42
   0   6 -11  105.54   20.71
   0  -6  11  143.51   11.21
   0  -6  10  314.20   16.96
   0   6 -10  346.01   18.77
   0   6 -10  387.77   40.48
   0  -6  10  359.73   23.63
   0  -6   9  497.75   17.81
   0   6  -9  486.66   17.83
   0   6  -9  485.48   23.88
   0  -6   9  518.27   22.48
   0  -6   8   16.78    4.02
   0   6  -8   31.53    5.28
   0   6  -8   29.66    6.17
   0  -6   8   19.70    5.49
   0  -6   7   15.99    3.42
   0   6  -7   30.78    5.11
   0   6  -7   19.60    3.83
   0  -6   7   23.03    7.08
   0  -6   6  707.44   26.20
   0   6  -6  608.26   23.38
   0   6  -6  622.49   23.39
   0  -6   6  658.26   25.12
   0  -6   5  677.82   22.55
   0   6  -5  747.07   24.79
   0   6  -5  792.40   25.60
   0  -6   5  650.56   21.79
   0  -6   4  423.33   31.59
   0   6  -4  396.75   30.30
   0   6  -4  417.02   31.08
   0  -6   4  467.80   35.03
   0  -6   3  993.41   28.01
   0   6  -3  988.25   29.21
   0   6  -3  916.94   25.54
   0  -6   3  903.06   24.77
   0  -6   3  996.17   27.34
   0   6  -3  830.62   22.96
   0  -6   2  591.77   19.85
   0   6  -2  817.30   25.62
   0  -6   2  556.20   17.95
   0  -6   2  595.87   19.36
   0   6  -2  778.60   24.29
   0  -6   1  913.63   30.09
   0   6  -1  769.20   27.11
   0   6  -1  710.35   22.56
   0  -6   1  823.23   25.65
   0  -6   1  860.54   26.49
   0   6  -1  715.25   22.33
   0   6   0  104.10   12.54
   0   6   0   85.74    8.81
   0  -6   0   56.77    5.91
   0  -6   0   69.51    6.57
   0   6   0   77.34    7.21
   0  -6  -1  121.25   21.98
   0   6   1  110.74   13.31
   0   6   1  114.41   11.93
   0  -6  -1  101.87   10.21
   0  -6  -1  100.85    9.90
   0   6   1  112.88   11.01
   0  -6  -2  276.79   29.79
   0   6   2  304.42   18.25
   0   6   2  309.11   14.12
   0  -6  -2  217.63    9.69
   0  -6  -2  235.51    9.52
   0   6   2  294.19   11.60
   0  -6  -3  302.02   30.78
   0   6   3  244.67   37.28
   0   6   3  211.63   29.47
   0  -6  -3  258.30   37.20
   0   6   3  193.90   26.37
   0  -6  -4   71.66   10.75
   0   6   4   96.24   12.39
   0   6   4  101.04   10.52
   0  -6  -5   45.71   11.22
   0   6   5   72.73   13.00
   0   6   5   61.76   10.37
   0   6   5   59.97    9.36
   0  -6  -6   14.16    4.72
   0   6   6   24.11    6.92
   0   6   6   23.82    6.09
   0  -6  -7    2.38    3.25
   0   6   7    2.28    4.73
   0   7 -13    3.21    2.43
   0  -7  13   16.00    9.85
   0   7 -12    1.23    1.92
   0   7 -12   -0.66    4.85
   0  -7  12   25.83   10.88
   0  -7  11   65.87   11.60
   0   7 -11   92.92    7.74
   0   7 -11   68.66   18.98
   0  -7  11   71.58   16.94
   0  -7  10  361.33   19.66
   0   7 -10  359.31   19.73
   0   7 -10  372.23   36.41
   0  -7   9  577.05   20.69
   0   7  -9  558.31   20.16
   0   7  -9  607.78   23.11
   0  -7   9  569.94   23.38
   0  -7   8  774.02   38.73
   0   7  -8  648.90   32.97
   0   7  -8  657.38   34.17
   0  -7   8  772.19   40.32
   0  -7   7  274.44   12.64
   0   7  -7  358.87   15.75
   0   7  -7  382.32   17.74
   0  -7   7  295.19   16.33
   0  -7   6  202.13   15.96
   0   7  -6  215.12   18.13
   0   7  -6  223.80   18.01
   0  -7   6  233.53   18.89
   0  -7   5   36.82    5.40
   0   7  -5   30.20    7.05
   0   7  -5   26.93    5.03
   0  -7   5   38.51    6.36
   0  -7   4  108.51   11.45
   0   7  -4   62.20    7.86
   0   7  -4   60.04    6.39
   0  -7   4  101.01    9.77
   0  -7   3  571.01   22.49
   0   7  -3  766.43   29.96
   0   7  -3  698.28   25.51
   0  -7   3  496.41   18.64
   0  -7   2 1203.92   43.14
   0   7  -2  914.23   32.68
   0   7  -2  935.95   32.88
   0  -7   1 1978.79  191.22
   0   7  -1 1943.90  188.16
   0   7  -1 1883.80  181.84
   0  -7   1 1658.99   64.54
   0  -7   1 1818.57   70.52
   0   7  -1 1740.94   67.54
   0   7   0  857.89   35.46
   0   7   0  821.49   31.27
   0  -7   0  707.76   26.72
   0  -7   0  826.70   30.74
   0   7   0  807.35   30.15
   0  -7  -1  330.57   18.86
   0   7   1  274.37   17.04
   0   7   1  310.63   16.89
   0  -7  -1  235.15   31.98
   0  -7  -1  299.89   15.20
   0   7   1  287.49   14.62
   0  -7  -2   15.29    5.54
   0   7   2   22.17    7.03
   0  -7  -2   11.85    3.62
   0  -7  -3   32.50   10.30
   0   7   3   12.73    6.27
   0   7   3   22.95    5.72
   0  -7  -3   41.77    8.21
   0  -7  -4   62.81   13.60
   0   7   4   98.97   16.44
   0   7   4  107.64   13.90
   0  -7  -5   23.04    6.21
   0   7   5   52.83   11.55
   0   7   5   34.75    5.77
   0  -7  -6    9.25    3.27
   0   7   6    0.46    5.03
   0   8 -13   14.87    4.80
   0  -8  13   11.04    7.33
   0   8 -12   18.43    6.41
   0  -8  12    6.08    7.04
   0  -8  11    1.19    2.53
   0   8 -11    1.64    2.37
   0   8 -11    7.28    3.09
   0  -8  11   -5.77    6.89
   0  -8  10    2.19    3.17
   0   8 -10   -1.06    2.81
   0   8 -10    8.50    3.21
   0  -8  10    2.86    7.10
   0  -8   9   41.68    8.89
   0   8  -9   21.48    5.34
   0   8  -9   29.67    8.35
   0  -8   9   35.00    9.88
   0  -8   8   16.41    4.82
   0   8  -8   21.02    6.54
   0   8  -8   16.19    5.35
   0  -8   8   16.54    7.02
   0  -8   7  319.74   14.25
   0   8  -7  278.79   13.16
   0   8  -7  287.70   13.73
   0  -8   7  331.19   16.68
   0  -8   6  759.88   38.47
   0   8  -6  713.58   37.19
   0   8  -6  705.24   36.25
   0  -8   6  805.90   40.91
   0  -8   5   71.24    9.67
   0   8  -5  125.71   15.63
   0   8  -5  108.08   12.27
   0  -8   5   66.56    8.97
   0  -8   4  118.43   14.58
   0   8  -4  102.62   14.84
   0   8  -4   80.71    9.84
   0  -8   4   87.84   10.11
   0  -8   3  308.04   15.61
   0   8  -3  298.31   15.33
   0   8  -3  277.08   13.10
   0  -8   3  284.56   12.94
   0  -8   2  121.34   23.96
   0   8  -2   48.01   12.38
   0   8  -2   51.66   11.93
   0  -8   2   87.58   18.88
   0   8  -2   45.98   10.32
   0  -8   1  119.51   20.51
   0   8  -1  224.54   32.59
   0   8  -1  216.28   29.67
   0  -8   1  136.02   18.87
   0   8  -1  196.82   26.92
   0  -8   0   43.47    8.37
   0   8   0  128.54   18.75
   0   8   0   63.23    9.96
   0  -8   0   49.03    7.55
   0  -8  -1   43.43   12.74
   0   8   1   63.50   11.04
   0   8   1   62.04    7.46
   0  -8  -1   33.66    8.45
   0  -8  -2    9.89    3.85
   0   8   2   15.25    6.82
   0   8   2   26.20    5.76
   0  -8  -3   41.18   10.26
   0   8   3   38.19   11.00
   0   8   3   35.85    7.36
   0  -8  -4   10.56    2.89
   0   8   4   30.10    9.66
   0  -8  -5   13.85    5.96
   0   8   5   11.62    6.42
   0   9 -12  188.36   32.85
   0  -9  12  237.04   24.81
   0  -9  11   12.66    4.38
   0   9 -11   16.28    5.20
   0   9 -11   12.11    4.63
   0  -9  11   11.76    6.34
   0  -9  10   36.77    7.59
   0   9 -10   25.76    6.45
   0   9 -10   17.46    6.04
   0  -9  10   35.07    8.95
   0  -9   9  108.63   13.83
   0   9  -9   99.90   12.61
   0   9  -9  124.62   12.68
   0  -9   9  113.87   15.58
   0  -9   8  202.70   13.58
   0   9  -8  229.43   14.61
   0   9  -8  224.47   14.36
   0  -9   8  209.62   14.90
   0  -9   7  601.43   33.02
   0   9  -7  544.02   29.87
   0   9  -7  600.29   32.25
   0  -9   7  543.70   29.40
   0  -9   6  280.71   19.39
   0   9  -6  293.31   20.55
   0   9  -6  300.21   20.46
   0  -9   6  275.08   18.43
   0  -9   5  414.23   17.09
   0   9  -5  443.21   19.18
   0   9  -5  439.86   16.91
   0  -9   5  396.88   16.22
   0  -9   4  410.48   17.60
   0   9  -4  409.58   19.02
   0   9  -4  385.78   15.77
   0  -9   4  394.09   15.06
   0  -9   3   28.31    7.73
   0   9  -3   86.96   10.96
   0   9  -3   82.11    8.54
   0  -9   3   36.78    7.87
   0  -9   2   93.66   15.87
   0   9  -2   93.11   11.17
   0   9  -2   82.22    8.35
   0  -9   2  111.20   10.19
   0  -9   1  149.90   26.33
   0   9  -1   70.93   12.29
   0   9  -1   84.87    9.74
   0  -9   1   97.14   10.40
   0  -9   0   93.50   20.21
   0   9   0   84.98   15.35
   0   9   0   85.97   13.41
   0  -9   0  111.22   18.30
   0  -9  -1  131.92   23.76
   0   9   1  152.28   14.01
   0   9   1  120.67    8.86
   0  -9  -2   54.31   12.40
   0   9   2   86.78   11.24
   0  -9  -3   30.05    9.10
   0   9   3   23.03    9.16
   0  -9  -4   23.56    8.43
   0   9   4   37.04   10.13
   0  10 -12   39.68    9.17
   0 -10  12   42.32   10.29
   0 -10  11  147.84   15.66
   0  10 -11  114.44   12.45
   0  10 -11   97.38   20.64
   0 -10  11  132.28   15.64
   0 -10  10  111.33   10.45
   0  10 -10  110.46   10.02
   0  10 -10  120.01   19.90
   0 -10  10  120.22   11.79
   0 -10   9   44.97    7.95
   0  10  -9   48.65    8.47
   0  10  -9   43.00    7.95
   0 -10   9   44.96    9.35
   0 -10   8    0.41    4.20
   0  10  -8    1.80    4.22
   0  10  -8   -5.72    3.68
   0 -10   8    0.67    4.83
   0 -10   7   21.26    7.87
   0  10  -7   25.85    8.17
   0  10  -7   19.79    5.91
   0 -10   7    9.52    6.73
   0 -10   6   27.92    7.26
   0  10  -6   20.71    5.99
   0  10  -6   28.48    6.65
   0 -10   6   40.81    7.88
   0 -10   5  161.97   12.20
   0  10  -5  183.26   13.50
   0  10  -5  195.85   13.02
   0 -10   5  164.32   11.51
   0 -10   4  108.73   19.14
   0  10  -4   48.41   11.42
   0  10  -4   63.76   10.66
   0 -10   4   98.50   14.78
   0 -10   3  270.77   29.08
   0  10  -3  281.96   15.89
   0  10  -3  274.59   11.83
   0 -10   3  270.36   11.23
   0 -10   2  133.23   18.47
   0  10  -2  123.39   12.52
   0  10  -2  127.52   10.02
   0 -10   2  123.74    8.61
   0 -10   1   24.65    9.01
   0  10  -1   33.79   10.47
   0  10  -1   14.77    4.27
   0 -10   0   18.65    5.26
   0  10   0   18.53    7.90
   0 -10  -1   24.06    7.19
   0  10   1   46.67   12.51
   0 -10  -2    4.21    2.24
   0 -11  10   76.35    8.64
   0  11 -10   99.35    9.52
   0  11 -10   62.82   12.89
   0 -11  10  101.92   11.36
   0 -11   9  169.07   17.31
   0  11  -9  179.05   19.32
   0  11  -9  170.64   17.68
   0 -11   9  168.24   18.17
   0 -11   8  242.09   17.62
   0  11  -8  196.16   16.08
   0  11  -8  196.49   15.77
   0 -11   8  245.54   18.06
   0 -11   7   75.64    8.44
   0  11  -7   75.53   10.33
   0  11  -7   88.00    8.86
   0 -11   7   51.50    6.14
   0 -11   6   15.11    6.00
   0  11  -6   12.13    8.20
   0  11  -6    8.28    5.61
   0 -11   6   19.08    6.29
   0 -11   5   35.74    8.39
   0  11  -5   32.61    9.83
   0  11  -5   36.04    6.50
   0 -11   5   29.51    5.49
   0 -11   4   43.03   13.46
   0  11  -4   27.77    8.09
   0  11  -4   56.59    7.06
   0 -11   4   56.30    5.87
   0 -11   3  125.07   22.27
   0  11  -3  162.04   17.61
   0  11  -3  136.96   10.77
   0 -11   2   67.12   15.34
   0  11  -2   72.63   11.91
   0  11  -1  101.56   15.09
   0 -11   0   26.89    9.89
   0  11   0    3.29    7.78
   0 -12   8  150.72   21.62
   0  12  -8  190.45   20.20
   0  12  -8  185.53   19.71
   0 -12   8  170.10   17.72
   0 -12   7   98.38   23.34
   0  12  -7  119.33   12.01
   0  12  -7  121.85   10.26
   0 -12   7  123.04   10.10
   0 -12   6  150.39   34.24
   0  12  -6  179.48   13.83
   0  12  -6  160.08   11.46
   0 -12   6  184.07   11.83
   0 -12   5   52.62    8.35
   0  12  -5   61.80   10.16
   0  12  -5   52.39    6.02
   0 -12   4   11.33    6.23
   0  12  -4    4.71    6.84
   0 -12   3   11.27    5.34
   0  12  -3   -5.46    6.47
  -1 -12   4   22.09    8.75
   1  12  -4   19.07    9.04
   1  12  -4   16.52    6.68
  -1 -12   5   10.43    6.54
   1  12  -5   31.91   10.27
   1  12  -5   19.33    6.65
  -1 -12   6   37.96   12.71
   1  12  -6   55.94   11.25
   1  12  -6   39.90    8.83
  -1 -12   7   56.72    8.45
   1  12  -7   59.67    8.94
   1  12  -7   91.76    9.95
  -1 -12   7   62.41    6.44
  -1 -12   8  173.82   18.65
   1  12  -8  163.15   18.39
   1  12  -8  136.85   15.20
  -1 -12   8  135.00   14.67
  -1 -11   1   51.46   11.04
   1  11  -1   78.02   13.56
   1  11  -2   72.18    8.39
  -1 -11   3  179.92   26.26
   1  11  -3  250.24   19.68
   1  11  -3  240.82   16.78
  -1 -11   4   88.62   12.43
   1  11  -4   30.99    9.56
   1  11  -4   59.38    7.17
  -1 -11   5   95.32    9.43
   1  11  -5  113.25   16.65
   1  11  -5   97.79    9.72
  -1 -11   5   73.79    6.47
   1  11  -6   19.69    9.63
   1  11  -6   19.19    6.51
  -1 -11   6   19.45    6.14
  -1 -11   7   19.90    6.70
   1  11  -7    9.32    5.19
   1  11  -7    3.83    4.23
  -1 -11   7    0.01    3.51
  -1 -11   8   25.36    9.85
   1  11  -8   12.31    5.60
   1  11  -8   18.33    7.76
  -1 -11   8   27.59    9.27
  -1 -11   9   89.75    9.79
   1  11  -9  105.09   10.36
   1  11  -9  116.08   11.59
  -1 -11   9  110.32   11.50
  -1 -11  10  182.98   14.27
   1  11 -10  162.01   11.86
   1  11 -10  187.30   15.00
  -1 -11  10  177.27   14.95
  -1 -11  11  142.10   15.85
   1  11 -11  121.66   13.82
   1  11 -11  157.14   18.16
  -1 -11  11  146.96   17.76
  -1 -10  -1    8.53    2.71
   1  10   1    4.32    6.26
  -1 -10   0   14.25    5.14
   1  10   0    1.56    6.73
   1  10   0    5.90    3.49
  -1 -10   1   29.49    6.80
   1  10  -1   62.76   13.38
   1  10  -1   30.41    6.74
   1  10  -2   46.05    9.62
  -1 -10   3  120.46   13.57
   1  10  -3  141.73   12.63
   1  10  -3  132.46    8.29
  -1 -10   3  133.17    6.16
  -1 -10   4   61.85    9.56
   1  10  -4   67.82   12.23
   1  10  -4   67.81    9.96
  -1 -10   4   59.78    7.84
  -1 -10   5  591.26   23.31
   1  10  -5  571.49   23.22
   1  10  -5  614.43  105.13
  -1 -10   5  591.22   21.33
  -1 -10   6   97.47   14.43
   1  10  -6   42.11    8.69
   1  10  -6   32.82    7.76
  -1 -10   6   82.56   11.22
  -1 -10   7  171.18   11.37
   1  10  -7  155.48   11.17
   1  10  -7  157.22   10.21
  -1 -10   7  146.00    8.93
  -1 -10   8    5.63    4.92
   1  10  -8   10.14    4.94
   1  10  -8    6.74    4.15
  -1 -10   8   30.26    8.89
  -1 -10   9   16.05    6.59
   1  10  -9   21.38    6.69
   1  10  -9    9.98    4.59
  -1 -10   9   20.85    5.83
  -1 -10  10   74.32    8.65
   1  10 -10   49.64    6.61
   1  10 -10   49.74    7.55
  -1 -10  10   65.71    8.63
  -1 -10  11   45.61    9.53
   1  10 -11   57.93   10.93
   1  10 -11   67.44   12.09
  -1 -10  11   54.22   11.73
  -1 -10  12   68.38    8.55
   1  10 -12   85.92   15.18
  -1 -10  12   71.86   10.91
  -1  -9  -3   52.92    7.99
   1   9   3   25.15    9.26
  -1  -9  -2   63.81   13.36
   1   9   2   94.83   12.84
   1   9   2   92.48    8.49
  -1  -9  -1   38.99    8.47
   1   9   1   22.67   10.26
   1   9   1   42.03    8.69
  -1  -9   0  162.10   28.52
   1   9   0  183.90   12.19
   1   9   0  188.58   10.58
  -1  -9   1  116.65   18.03
   1   9  -1  110.33   20.99
   1   9  -1  133.73   11.00
  -1  -9   2   57.13   10.22
   1   9  -2   45.05   11.42
   1   9  -2   63.45    8.84
  -1  -9   2   54.11   10.43
  -1  -9   3  131.38   13.28
   1   9  -3  123.95   13.43
   1   9  -3  139.83   13.46
  -1  -9   3  120.09   10.88
  -1  -9   4  366.53   24.16
   1   9  -4  439.19   30.25
   1   9  -4  434.99   27.90
  -1  -9   4  386.46   24.00
  -1  -9   5  217.25   16.24
   1   9  -5  164.81   15.80
   1   9  -5  196.40   14.55
  -1  -9   5  221.22   15.64
  -1  -9   6  477.21   30.81
   1   9  -6  495.61   32.40
   1   9  -6  492.16   31.45
  -1  -9   6  518.46   32.45
  -1  -9   7  272.95   16.62
   1   9  -7  328.96   19.70
   1   9  -7  308.85   18.59
  -1  -9   7  252.10   16.15
  -1  -9   8   26.13    8.69
   1   9  -8    1.95    4.11
   1   9  -8    6.84    4.53
  -1  -9   8   17.43    6.44
  -1  -9   9   -2.40    4.21
   1   9  -9   12.81    4.06
   1   9  -9   10.91    5.32
  -1  -9   9    5.78    5.68
  -1  -9  10   15.92    5.13
   1   9 -10   15.82    5.24
   1   9 -10   13.30    5.51
  -1  -9  10   24.16    6.87
  -1  -9  11   17.45    5.29
   1   9 -11   14.48    3.56
   1   9 -11   15.91    4.56
  -1  -9  11   38.65   11.62
  -1  -9  12   35.71    7.56
   1   9 -12   46.12   10.80
  -1  -9  12   44.24   10.70
   1   9 -13   41.94   11.46
  -1  -9  13   49.64   10.21
  -1  -8  -4   10.48    2.62
   1   8   4   31.57   10.69
  -1  -8  -3   22.14    6.00
   1   8   3   24.18   10.86
   1   8   3    7.90    5.90
  -1  -8  -2    6.31    4.56
   1   8   2   18.89    7.56
   1   8   2   11.34    4.73
  -1  -8  -1  273.70   33.00
   1   8   1  237.84   16.42
   1   8   1  269.02   16.09
  -1  -8   0  511.84   38.16
   1   8   0  492.85   34.02
   1   8   0  492.17   30.73
  -1  -8   0  439.52   26.14
  -1  -8   1  413.63   17.33
   1   8  -1  354.15   17.39
   1   8  -1  373.31   14.75
  -1  -8   1  399.61   13.56
  -1  -8   2  529.24   28.53
   1   8  -2  566.27   31.50
   1   8  -2  582.89   29.80
  -1  -8   2  498.74   24.73
  -1  -8   3   30.42    8.74
   1   8  -3   29.65    9.76
   1   8  -3   40.57    9.73
  -1  -8   3   12.04    3.98
   1   8  -3   26.15    6.23
  -1  -8   4   82.46   10.85
   1   8  -4   99.50   12.74
   1   8  -4   98.29   11.50
  -1  -8   4   95.35   10.92
  -1  -8   5   36.57    7.74
   1   8  -5   42.14    7.41
   1   8  -5   33.86    5.69
  -1  -8   5   46.41    7.19
  -1  -8   6  128.93   19.17
   1   8  -6  133.27   19.36
   1   8  -6  148.22   21.22
  -1  -8   6  135.60   19.97
  -1  -8   7  558.21   21.23
   1   8  -7  583.52   21.80
   1   8  -7  604.30   23.13
  -1  -8   7  600.47   23.62
  -1  -8   8  829.40   29.87
   1   8  -8  784.74   27.87
   1   8  -8  863.68   31.81
  -1  -8   8  832.16   31.01
  -1  -8   9 1088.62   55.81
   1   8  -9 1096.08   55.68
   1   8  -9 1173.74  167.95
  -1  -8   9 1055.30   55.02
  -1  -8  10  409.23   24.23
   1   8 -10  402.84   23.22
   1   8 -10  429.88   26.26
  -1  -8  10  418.41   26.90
  -1  -8  11   30.33    7.72
   1   8 -11   52.90   12.04
  -1  -8  11   45.70   12.85
  -1  -8  12   11.95    4.97
   1   8 -12   13.67    5.64
  -1  -8  12   11.24   10.62
   1   8 -13   -0.43    5.12
  -1  -7  -6   18.29    7.38
   1   7   6   33.64    8.57
  -1  -7  -5   51.11   12.02
   1   7   5   47.00    8.27
   1   7   5   55.34    8.22
  -1  -7  -4   41.02    9.71
   1   7   4   58.59   12.74
   1   7   4   47.35   10.25
  -1  -7  -3  126.96   24.82
   1   7   3  107.66   19.60
   1   7   3   93.00   15.44
  -1  -7  -2   98.77   14.36
   1   7   2  109.28   13.44
   1   7   2  137.63   13.17
  -1  -7  -1   67.69   15.25
   1   7   1   55.22   13.31
   1   7   1   49.51    8.82
  -1  -7   0   15.85    4.61
   1   7   0   11.06    7.06
   1   7   0    6.99    4.40
  -1  -7   0   12.26    1.74
   1   7   0   11.96    2.46
   1   7  -1  354.90   27.84
   1   7  -1  356.45   27.07
  -1  -7   1  306.62   22.60
   1   7  -1  341.30   25.11
  -1  -7   2  284.52   22.14
   1   7  -2  282.91   23.91
   1   7  -2  287.28   22.29
  -1  -7   2  316.55   23.58
   1   7  -2  263.97   19.79
  -1  -7   3  585.65   25.05
   1   7  -3  700.87   31.49
   1   7  -3  718.31   29.74
  -1  -7   3  614.79   24.97
   1   7  -3  648.14   26.13
  -1  -7   4  770.42   29.07
   1   7  -4  759.15   29.04
   1   7  -4  777.84   29.05
  -1  -7   4  761.33   27.66
  -1  -7   5  403.70   30.60
   1   7  -5  376.89   29.54
   1   7  -5  408.15   40.35
  -1  -7   5  393.99   29.72
  -1  -7   6   65.75    9.11
   1   7  -6   78.62   10.22
   1   7  -6   69.59    9.22
  -1  -7   6   43.65    6.87
  -1  -7   7   10.55    4.63
   1   7  -7    3.82    3.70
   1   7  -7   11.94    4.55
  -1  -7   7    5.15    5.95
  -1  -7   8  116.62   17.11
   1   7  -8  110.93   15.99
   1   7  -8  121.94   18.82
  -1  -7   8  119.62   18.04
  -1  -7   9  419.24   16.27
   1   7  -9  385.12   15.07
   1   7  -9  399.10   17.36
  -1  -7   9  402.39   18.89
  -1  -7  10   64.87    8.25
   1   7 -10   34.25    7.27
   1   7 -10   48.64   12.95
  -1  -7  10   61.45   11.31
  -1  -7  11   82.20   10.74
   1   7 -11   60.22    7.84
   1   7 -11   72.96   12.88
  -1  -7  11   53.85    8.62
  -1  -7  12   43.15    7.13
   1   7 -12   41.76    9.12
  -1  -7  12   31.27    9.05
   1   7 -13    3.20    2.77
  -1  -7  13   22.59   10.49
  -1  -6  -7   10.77    5.03
   1   6   7   10.95    7.00
   1   6   7    9.36    4.27
  -1  -6  -6   -1.32    2.90
   1   6   6   12.31    5.78
   1   6   6   -0.69    4.37
  -1  -6  -5   67.76   16.94
   1   6   5   68.12   14.26
   1   6   5  102.53   10.79
  -1  -6  -4   69.04   14.73
   1   6   4   74.11   10.44
   1   6   4   83.22   10.12
  -1  -6  -3  195.57   31.77
   1   6   3  207.73   24.06
   1   6   3  207.27   22.60
  -1  -6  -2  327.66   17.87
   1   6   2  445.23   26.71
   1   6   2  400.00   22.49
  -1  -6  -1  643.85   27.10
   1   6   1  505.77   23.55
   1   6   1  531.82   22.84
  -1  -6  -1  606.02   23.35
  -1  -6   0  310.75   13.45
   1   6   0  319.22   14.77
   1   6   0  308.15   13.98
  -1  -6   0  314.99   11.13
   1   6   0  310.25   11.13
   1   6  -1   88.58   11.89
   1   6  -1   87.76    8.72
  -1  -6   1   64.21    5.29
   1   6  -1   74.34    6.19
  -1  -6   2  153.38   13.28
   1   6  -2  201.38   17.32
   1   6  -2  190.42   15.51
  -1  -6   2  154.36   12.00
   1   6  -2  203.05   15.36
  -1  -6   3 3335.16   99.46
   1   6  -3 3082.08   92.25
   1   6  -3 3153.82   93.99
  -1  -6   3 3313.90   97.98
   1   6  -3 3055.07   90.26
  -1  -6   4 1413.63   43.77
   1   6  -4 1492.40   45.99
   1   6  -4 1536.09   47.19
  -1  -6   4 1399.34   42.69
   1   6  -4 1359.49   41.26
  -1  -6   5 2607.27   78.24
   1   6  -5 2677.77   80.27
   1   6  -5 2676.73   80.32
  -1  -6   5 2638.54   79.06
  -1  -6   6  432.68   17.07
   1   6  -6  505.05   20.23
   1   6  -6  500.56   19.73
  -1  -6   6  368.43   15.42
  -1  -6   7  968.01   38.99
   1   6  -7  851.31   34.42
   1   6  -7  944.52   38.83
  -1  -6   7  902.53   38.26
  -1  -6   8   57.12    7.08
   1   6  -8   62.58    7.42
   1   6  -8   70.67    9.57
  -1  -6   8   71.26   10.07
  -1  -6   9   16.27    6.47
   1   6  -9   13.02    5.00
   1   6  -9   12.46    7.14
  -1  -6   9   26.08   10.06
  -1  -6  10   11.87    4.34
   1   6 -10    9.95    3.60
   1   6 -10   11.59    6.96
  -1  -6  10   21.25    7.59
  -1  -6  11  631.32  102.10
   1   6 -11  567.39   31.23
   1   6 -11  611.08  100.37
  -1  -6  11  614.05  100.42
  -1  -6  12  116.66    8.48
  -1  -6  12  121.66   12.41
   1   6 -13  111.47   25.22
  -1  -6  13  126.75   15.04
   1   5   8   11.27    7.18
   1   5   8   10.21    5.30
  -1  -5  -7   69.95    6.41
   1   5   7   59.08    7.00
   1   5   7   81.24    9.07
  -1  -5  -6   90.59   18.13
   1   5   6  123.47   11.61
   1   5   6  116.69   21.56
  -1  -5  -5   76.61   14.94
   1   5   5   64.76   10.59
   1   5   5   77.39   10.54
   1   5   5   60.02    6.61
  -1  -5  -4   97.92   18.34
   1   5   4  101.29   12.36
   1   5   4   97.37   11.96
   1   5   4   90.60   17.27
   1   5   4   94.21    9.90
  -1  -5  -3  224.37   21.20
   1   5   3  257.06   15.76
   1   5   3  270.57   13.92
   1   5   3  235.25    9.05
   1   5   3  251.47    9.73
  -1  -5  -2  382.19   16.87
   1   5   2  303.57   14.72
   1   5   2  343.56   16.23
   1   5   2  295.70   10.34
   1   5   2  292.01   10.26
  -1  -5  -1  561.03   19.22
   1   5   1  550.84   19.99
   1   5   1  564.96   19.89
  -1  -5  -1  483.32   39.73
   1   5   1  541.47   16.10
  -1  -5   0 1263.79   34.55
   1   5   0 1345.11   37.74
   1   5   0 1381.20   37.40
  -1  -5   0 1172.81   31.48
  -1  -5   0 1237.75   31.84
   1   5   0 1378.10   35.45
  -1  -5   1 1396.54   37.74
   1   5  -1 1252.90   35.61
   1   5  -1 1223.57   33.20
  -1  -5   1 1323.96   35.35
  -1  -5   1 1332.08   34.48
   1   5  -1 1176.24   30.62
  -1  -5   2  750.77   21.56
   1   5  -2  895.54   25.62
   1   5  -2  905.17   25.61
  -1  -5   2  788.89   22.12
  -1  -5   2  815.34   21.96
   1   5  -2  889.27   23.82
  -1  -5   3  481.73   27.96
   1   5  -3  458.62   27.11
   1   5  -3  456.59   26.64
  -1  -5   3  436.31   25.08
  -1  -5   3  451.76   25.98
   1   5  -3  453.75   25.89
  -1  -5   4   80.92    6.48
   1   5  -4   84.82    9.33
  -1  -5   4  101.94    7.20
  -1  -5   4   94.96    7.40
   1   5  -4   80.21    5.76
  -1  -5   5  630.08   18.49
   1   5  -5  636.09   18.62
   1   5  -5  663.79   20.49
  -1  -5   5  605.31   19.09
  -1  -5   6  761.24   24.83
   1   5  -6  687.53   21.93
  -1  -5   6  706.19   22.53
   1   5  -6  662.64   21.93
  -1  -5   6  735.71   24.57
  -1  -5   7 1325.10   46.54
   1   5  -7 1266.43   43.99
  -1  -5   7 1193.43   41.49
   1   5  -7 1383.60   49.00
  -1  -5   7 1276.30   46.46
  -1  -5   8  411.69   40.65
   1   5  -8  461.65   19.01
  -1  -5   8  379.15   28.08
   1   5  -8  495.75   21.90
  -1  -5   9  382.90   16.46
   1   5  -9  345.46   13.97
  -1  -5   9  313.03   12.87
   1   5  -9  357.20   34.49
  -1  -5   9  396.48   19.54
  -1  -5  10   60.21    9.55
   1   5 -10   83.46   12.47
   1   5 -10   69.62   13.35
  -1  -5  10   51.68   12.93
  -1  -5  11    7.72    4.58
   1   5 -11   11.60    2.66
   1   5 -11   14.18    3.54
  -1  -5  11    8.92    7.19
   1   5 -12   26.98    7.39
  -1  -5  12   60.66   14.22
   1   5 -13   53.10   12.73
  -1  -5  13   59.43   10.94
   1   4   9   18.14    7.41
   1   4   9    3.65    4.90
   1   4   8   19.56    6.20
   1   4   8    1.11    4.67
   1   4   8   -3.79    5.06
  -1  -4  -7   20.97    5.47
   1   4   7   29.88   10.07
   1   4   7   24.78    6.84
   1   4   7   13.73    3.65
  -1  -4  -6   28.79    7.53
   1   4   6   39.62   10.04
   1   4   6   32.29    8.23
   1   4   6   43.59    8.79
  -1  -4  -5  169.41   30.42
   1   4   5  201.55   28.60
   1   4   5  175.24   23.93
   1   4   5  217.43   29.82
  -1  -4  -4  163.14   24.30
  -1  -4  -4  147.23   12.45
   1   4   4  136.80   12.86
   1   4   4  122.43   12.22
   1   4   4  140.48   11.17
  -1  -4  -3   96.22   13.10
  -1  -4  -3   99.21    9.88
   1   4   3   89.67   10.22
   1   4   3  105.20    9.20
  -1  -4  -2  137.26   11.21
   1   4   2  151.73   12.59
  -1  -4  -2  123.34    9.91
   1   4   2  140.58   10.32
   1   4   2  157.27   11.62
  -1  -4  -1   97.02    7.17
   1   4   1  187.47   12.74
   1   4   1  202.03   13.38
  -1  -4  -1  102.13    7.19
  -1  -4  -1  113.28    6.46
   1   4   1  206.64   11.58
   1   4   0 1678.10   32.97
  -1  -4   0 1608.63   31.06
  -1  -4   0 1699.12   31.17
   1   4   0 1586.98   29.21
  -1  -4   1  552.64   26.63
   1   4  -1  387.13   19.09
   1   4  -1  408.98   20.14
  -1  -4   1  516.49   24.69
  -1  -4   1  534.71   25.03
   1   4  -1  393.50   18.59
  -1  -4   2 3535.01   66.19
   1   4  -2 3658.53   67.91
  -1  -4   2 3435.21   64.05
  -1  -4   2 3508.69   64.71
   1   4  -2 3829.92   70.50
  -1  -4   3 1438.05   28.50
   1   4  -3 1257.54   24.91
   1   4  -3 1301.97   25.93
  -1  -4   3 1400.24   27.28
   1   4  -3 1310.63   26.20
  -1  -4   3 1474.75   29.08
  -1  -4   3 1473.42   28.85
   1   4  -3 1276.09   24.95
   1   4  -4  553.82   26.51
   1   4  -4  565.57   27.16
  -1  -4   4  464.63   22.47
   1   4  -4  580.15   28.33
  -1  -4   4  493.57   24.44
   1   4  -4  554.98   26.77
  -1  -4   5   79.95    5.72
   1   4  -5   64.77    4.91
   1   4  -5   71.23    5.51
  -1  -4   5   78.07    5.21
   1   4  -5   72.07    6.42
  -1  -4   5   83.24    6.93
   1   4  -5   73.18    5.20
  -1  -4   6    6.84    3.55
   1   4  -6   14.79    4.23
   1   4  -6    6.22    3.19
  -1  -4   6   12.88    3.79
   1   4  -6    0.52    3.59
  -1  -4   6    9.43    5.09
  -1  -4   7  235.29   18.31
   1   4  -7  128.48   10.21
   1   4  -7  141.46   10.89
  -1  -4   7  227.47   17.07
   1   4  -7  142.20   12.08
  -1  -4   7  240.40   20.27
  -1  -4   8  183.09   15.93
   1   4  -8  209.60   17.69
   1   4  -8  276.34   10.80
  -1  -4   8  180.61   15.30
   1   4  -8  280.99   28.13
  -1  -4   8  183.59   17.45
  -1  -4   9  357.31   15.27
   1   4  -9  289.77   12.25
   1   4  -9  321.26   12.75
  -1  -4   9  345.41   13.78
   1   4  -9  312.75   14.67
  -1  -4   9  427.39   20.68
   1   4 -10  313.13   11.26
   1   4 -10  317.74   19.01
  -1  -4  10  248.99   48.12
  -1  -4  11   66.12    7.84
   1   4 -11   34.34    9.87
   1   4 -11   46.71   13.21
  -1  -4  11   82.96   13.42
   1   4 -12   69.44   17.64
  -1  -4  12   67.00   15.02
   1   4 -13   22.94   11.25
  -1  -4  13   39.90    8.38
   1   3   9    4.83    4.43
   1   3   9    5.00    5.70
   1   3   8    4.55    2.56
  -1  -3  -8    3.76    3.36
   1   3   8   11.77    7.39
   1   3   8    0.23    2.56
  -1  -3  -7   38.38    7.99
  -1  -3  -7   30.22    7.03
   1   3   7   47.34   11.33
   1   3   7   67.39    8.91
  -1  -3  -6    0.59    2.06
  -1  -3  -6   11.76    5.14
   1   3   6   29.87    8.63
   1   3   6    9.25    2.35
   1   3   6   12.07    3.77
  -1  -3  -5  288.36   23.27
  -1  -3  -5  289.20   22.74
   1   3   5  277.55   22.55
   1   3   5  228.76   17.35
   1   3   5  273.83   20.89
  -1  -3  -4  208.14   25.55
  -1  -3  -4  212.57   18.45
   1   3   4  200.78   18.50
   1   3   4  180.77   15.17
   1   3   4  195.31   16.84
  -1  -3  -3  420.39   24.48
   1   3   3  484.66   27.60
  -1  -3  -3  431.32   25.25
   1   3   3  486.87   27.69
   1   3   3  529.25   30.59
   1   3   3  530.14   29.88
  -1  -3  -2  338.67   16.95
   1   3   2  227.03   11.76
  -1  -3  -2  362.20   18.49
   1   3   2  243.99   13.55
  -1  -3  -2  343.56   16.90
   1   3   2  251.38   11.94
   1   3   2  249.33   12.05
  -1  -3  -1 1224.51   24.40
   1   3   1 1244.69   24.50
  -1  -3  -1 1326.01   26.66
   1   3   1 1246.61   27.25
   1   3   1 1320.09   26.47
  -1  -3  -1 1210.96   23.79
   1   3   1 1295.66   23.66
   1   3   1 1301.89   23.79
  -1  -3   0   70.48    4.05
   1   3   0   52.97    3.84
  -1  -3   0   76.16    5.36
   1   3   0   43.79    6.53
   1   3   0   51.84    4.93
  -1  -3   0   62.42    3.92
   1   3   0   49.69    1.71
  -1  -3   1  311.92   10.12
  -1  -3   1  310.29    9.01
   1   3  -2 1622.68   20.43
   1   3  -2 1645.58   21.56
  -1  -3   2 1893.44   23.23
   1   3  -2 1654.95   20.70
  -1  -3   3  347.30   10.93
  -1  -3   3  305.81    9.58
  -1  -3   3  353.42   11.59
   1   3  -4 2177.88   27.25
   1   3  -4 2296.64   27.92
   1   3  -4 2329.41   29.81
  -1  -3   4 2274.75   29.74
  -1  -3   5 1073.73   21.82
   1   3  -5  934.93   18.88
   1   3  -5  982.12   19.18
  -1  -3   5 1024.81   19.98
  -1  -3   5  998.75   20.52
  -1  -3   6   89.82    6.43
   1   3  -6  133.86    8.70
   1   3  -6  140.72    8.64
  -1  -3   6   98.73    6.26
   1   3  -6  144.17   10.05
  -1  -3   6   92.68    8.53
  -1  -3   7  158.45   12.73
   1   3  -7  159.23   12.19
   1   3  -7  185.20   13.85
  -1  -3   7  154.97   11.95
  -1  -3   7  173.27   15.89
  -1  -3   8  247.60   21.11
   1   3  -8  218.87   18.62
   1   3  -8  234.46   19.41
  -1  -3   8  220.75   18.40
   1   3  -8  230.80   26.17
  -1  -3   8  231.54   21.68
  -1  -3   9  263.79   11.86
   1   3  -9  248.79   10.86
   1   3  -9  283.87   11.25
  -1  -3   9  244.40   10.08
   1   3  -9  281.60   26.05
  -1  -3   9  317.87   18.71
  -1  -3  10   74.00   11.66
   1   3 -10   32.32    7.14
   1   3 -10   47.38   10.71
  -1  -3  10   77.60   14.98
  -1  -3  11   62.24    9.74
   1   3 -11   46.29    8.89
   1   3 -11   78.80   16.91
  -1  -3  11   82.43   15.31
   1   3 -12   40.60   10.51
  -1  -3  12   43.46   10.65
   1   3 -13   18.64    8.08
  -1  -3  13   19.15    7.36
  -1  -2 -10   45.08    9.30
   1   2  10   47.66   11.11
   1   2  10   45.14    8.78
  -1  -2  -9  105.40    9.40
   1   2   9  100.26   10.84
   1   2   9   88.20    9.87
   1   2   8   26.36    5.25
  -1  -2  -8   40.04    7.23
   1   2   8   27.96    7.81
   1   2   8   34.72    6.92
   1   2   7   30.43    5.65
  -1  -2  -7   32.51    6.20
   1   2   7   21.77    8.97
   1   2   7   36.58    6.94
  -1  -2  -6   23.03    3.52
   1   2   6   16.08    2.76
  -1  -2  -6   16.44    3.24
   1   2   6   33.71    8.11
   1   2   6   20.98    2.83
   1   2   6   16.06    5.09
  -1  -2  -5   63.83   11.68
   1   2   5   52.43    5.13
  -1  -2  -5   84.55    9.35
   1   2   5   54.43    7.10
   1   2   5   41.79    8.78
   1   2   5   55.89    6.04
  -1  -2  -4  506.67   28.77
   1   2   4  657.76   18.17
  -1  -2  -4  529.96   30.61
   1   2   4  704.04   21.32
   1   2   4  641.50   17.66
   1   2   4  702.25   19.54
  -1  -2  -3 1531.57   29.44
   1   2   3 1322.35   25.60
   1   2   3 1268.27   25.40
   1   2   3 1284.84   25.15
   1   2   3 1371.23   27.92
   1   2   3 1275.22   24.29
   1   2   3 1342.76   25.93
  -1  -2  -2 1774.05   22.50
   1   2   2 1959.47   24.36
  -1  -2  -2 1774.26   23.80
   1   2   2 1890.75   24.87
   1   2   2 2075.48   27.10
   1   2   2 1922.18   22.95
   1   2   2 1966.27   23.45
  -1  -2  -1 2681.05   32.33
   1   2   1 2638.70   31.84
  -1  -2  -1 2659.60   33.21
   1   2   1 2531.46   31.28
   1   2   1 2748.84   33.92
  -1  -2  -1 2598.40   31.65
   1   2   1 2696.91   30.80
   1   2   1 2564.45   29.29
  -1  -2   0 3783.20   44.69
   1   2   0 3633.22   42.87
  -1  -2   0 3941.29   46.92
   1   2   0 3693.57   44.14
   1   2  -1  833.50   23.10
  -1  -2   1  807.96   22.47
   1   2  -1  860.28   24.03
  -1  -2   1  797.15   21.58
  -1  -2   1  807.68   21.90
  -1  -2   2 1137.21   15.24
   1   2  -2 1252.70   16.67
   1   2  -2 1281.76   15.83
   1   2  -2 1277.87   16.98
  -1  -2   3  297.41    9.33
   1   2  -3  179.35    8.20
  -1  -2   3  290.65    9.52
  -1  -2   3  285.59    8.86
   1   2  -4 4682.39   55.02
   1   2  -4 4795.30   55.00
  -1  -2   4 4703.05   54.01
   1   2  -4 4675.86   55.47
  -1  -2   4 4654.78   55.25
  -1  -2   5  662.85   37.43
   1   2  -5  545.85   25.96
   1   2  -5  548.76   25.61
  -1  -2   5  667.36   37.19
   1   2  -5  525.92   25.45
  -1  -2   5  656.34   37.13
  -1  -2   5  663.22   37.52
  -1  -2   5  742.41   17.91
  -1  -2   6 1309.10   35.10
   1   2  -6 1338.97   35.42
   1   2  -6 1359.79   35.18
  -1  -2   6 1315.20   34.07
  -1  -2   6 1344.33   37.18
  -1  -2   7  117.38   10.21
   1   2  -7   70.23    6.40
   1   2  -7   77.16    8.33
   1   2  -7   84.92   10.40
  -1  -2   7  124.73   13.10
  -1  -2   8   26.36    4.81
   1   2  -8   15.04    2.60
   1   2  -8   24.99    4.55
  -1  -2   8   11.76    2.14
   1   2  -8   15.59    3.55
  -1  -2   8   10.67    6.62
  -1  -2   9  156.96   15.64
  -1  -2   9  203.16   10.23
   1   2  -9  176.56   17.47
  -1  -2   9  182.77   18.14
   1   2  -9  203.16   24.01
  -1  -2   9  188.20   20.38
  -1  -2  10    1.95    2.76
   1   2 -10    8.69    3.35
   1   2 -10    9.15    3.68
  -1  -2  10   18.60    9.03
  -1  -2  11  141.66    9.39
   1   2 -11  128.32    7.89
   1   2 -11  130.69   22.13
  -1  -2  11  156.98   13.24
   1   2 -12   11.54    3.95
  -1  -2  12   -6.02    5.33
   1   2 -13   31.31    8.90
  -1  -2  13   19.58    6.65
  -1  -1 -11    7.70    3.80
   1   1  11    8.96    8.09
   1   1  11    5.30    3.46
  -1  -1 -10   11.65    4.05
   1   1  10    7.47    6.20
   1   1  10   15.26    6.55
  -1  -1  -9   78.46   10.29
   1   1   9   91.48   14.18
   1   1   9   99.23   12.62
   1   1   8   47.46    9.56
  -1  -1  -8   15.79    4.97
   1   1   8   58.96   14.78
   1   1   8   54.55   11.37
   1   1   7  179.35   17.83
   1   1   7  197.87    8.94
  -1  -1  -7  118.59   19.15
   1   1   7  212.73   13.46
   1   1   7  198.32   10.67
   1   1   6  143.39   12.15
   1   1   6  140.43   12.44
  -1  -1  -6   94.44   19.49
   1   1   6  133.39   13.48
   1   1   6  133.64   12.82
  -1  -1  -5   58.37    4.99
   1   1   5   34.56    3.42
  -1  -1  -5   78.36   13.65
   1   1   5   32.99    6.81
   1   1   5   19.01    5.06
   1   1   5   41.59    5.16
  -1  -1  -4  122.21    8.03
   1   1   4  118.50    7.24
  -1  -1  -4  126.36   19.23
   1   1   4  111.48    7.56
   1   1   4  100.88   14.53
   1   1   4  112.41    8.23
   1   1   4  113.93    7.18
   1   1   4  120.59    8.30
  -1  -1  -3  396.69   18.87
   1   1   3  394.26   18.71
  -1  -1  -3  382.92   19.99
   1   1   3  389.68   19.09
   1   1   3  378.17   18.32
   1   1   3  374.51   19.20
   1   1   3  381.43   18.22
   1   1   3  388.21   18.84
   1   1   2  408.41   11.58
   1   1   2  392.03   12.16
   1   1   2  389.69   11.46
   1   1   2  409.69   13.49
   1   1   2  391.63   11.35
  -1  -1  -1 8522.73   98.29
   1   1   1 7798.95   89.91
   1   1   1 8202.16   94.31
   1   1   0 5280.64   60.59
  -1  -1   0 5091.13   58.86
   1   1   0 5437.10   62.70
  -1  -1   0 5035.42   58.03
  -1  -1   1   42.39    2.41
   1   1  -1   67.44    3.46
  -1  -1   1   47.78    3.22
   1   1  -1   67.69    2.48
   1   1  -1   53.92    2.62
  -1  -1   1   36.86    2.18
   1   1  -1   64.41    2.82
  -1  -1   1   48.20    3.58
   1   1  -2  103.48    3.12
   1   1  -2   98.06    3.28
   1   1  -2  101.23    4.25
   1   1  -2   99.26    4.20
  -1  -1   3 1987.65   24.47
   1   1  -3 1837.83   23.41
  -1  -1   4  472.87   14.50
   1   1  -4  409.27   12.05
   1   1  -4  426.87   11.90
  -1  -1   4  473.59   12.95
  -1  -1   4  440.97   13.32
   1   1  -4  433.94   14.18
  -1  -1   4  430.27   12.90
  -1  -1   5  422.87   21.03
   1   1  -5  335.99   16.31
   1   1  -5  347.11   16.69
  -1  -1   5  431.81   20.27
   1   1  -5  366.16   20.32
  -1  -1   5  412.97   19.92
  -1  -1   5  385.60   18.78
  -1  -1   5  465.35   23.56
  -1  -1   6  279.26   16.87
   1   1  -6  233.34   13.86
   1   1  -6  240.58   13.81
  -1  -1   6  275.44   15.69
   1   1  -6  212.33   14.45
  -1  -1   6  293.42   19.22
  -1  -1   7 1451.47   43.46
  -1  -1   7 1564.01   47.44
   1   1  -7 1534.32   45.75
  -1  -1   7 1493.29   44.44
   1   1  -7 1484.05   49.21
  -1  -1   7 1647.49   51.57
  -1  -1   8  860.68   33.95
  -1  -1   8 1003.37   40.39
   1   1  -8 1044.74   40.78
  -1  -1   8  953.15   37.36
   1   1  -8 1087.19   43.89
  -1  -1   8  989.48   40.66
  -1  -1   9  400.65   20.17
  -1  -1   9  505.37   26.17
   1   1  -9  474.03   23.62
  -1  -1   9  464.92   23.25
   1   1  -9  510.14   26.74
  -1  -1   9  497.70   27.25
   1   1 -10   -1.55    1.52
   1   1 -10    7.29    2.66
  -1  -1  10   -3.74    5.24
  -1  -1  11   45.70    6.79
   1   1 -11   51.40   11.96
  -1  -1  11   42.16    8.94
   1   1 -12    7.94    4.80
  -1  -1  12    9.57    5.74
   1   1 -13    5.55    4.89
  -1  -1  13   20.66    8.96
  -1   0 -11    4.17    2.31
   1   0  11    2.10    6.26
   1   0  11    7.81    4.30
  -1   0 -10    1.26    2.57
   1   0  10    5.35    5.39
   1   0  10    0.18    4.30
   1   0   9   22.35    4.68
  -1   0  -9   18.39    6.03
   1   0   9   17.72    5.56
   1   0   8  268.39    9.53
   1   0   8  271.85   10.28
  -1   0  -8  278.64   11.81
  -1   0  -8  268.82   12.57
   1   0   8  287.40   13.50
   1   0   7  457.09   18.20
   1   0   7  453.36   18.40
  -1   0  -7  489.07   22.16
  -1   0  -7  493.48   21.75
   1   0   7  464.36   20.69
   1   0   6 1676.43   49.52
   1   0   6 1746.71   51.87
  -1   0  -6 1801.63   55.60
  -1   0  -6 1877.43   56.98
   1   0   6 1741.61   53.28
   1   0   5  817.92   21.45
   1   0   5  852.69   22.61
  -1   0  -5  958.13   26.37
   1   0   5  817.50   22.72
  -1   0  -5  948.95   26.77
   1   0   5  757.37   20.78
   1   0   5  836.83   23.42
   1   0   4  521.28   24.33
   1   0   4  512.32   24.04
  -1   0  -4  408.97   20.20
   1   0   4  519.77   24.94
   1   0   4  510.73   24.70
  -1   0  -4  387.38   18.94
  -1   0  -3  899.85   24.26
   1   0   3  882.24   23.75
  -1   0  -3  883.08   24.81
   1   0   3  891.50   24.95
   1   0   3  860.39   25.23
   1   0   3  888.53   24.92
  -1   0  -3  879.32   24.55
  -1   0  -2  226.26    6.59
   1   0   2  176.90    5.14
  -1   0  -2  212.26    7.55
   1   0   2  169.52    6.32
  -1   0  -2  240.59    8.28
   1   0   2  165.69    5.73
   1   0   2  171.27    6.34
  -1   0  -2  219.08    7.13
   1   0   1  412.93   11.22
   1   0   1  415.74   11.90
   1   0   1  417.31   11.89
   1   0   1  353.04   10.62
   1   0   1  412.06   11.69
  -1   0   0   -0.32    1.07
   1   0   0   -2.20    0.83
  -1   0   1   18.02    1.65
  -1   0   1   20.62    1.05
  -1   0   2 8982.28  103.06
  -1   0   3  757.75   21.63
   1   0  -3  772.03   21.88
  -1   0   3  759.53   20.65
  -1   0   3  735.74   19.93
   1   0  -3  812.55   22.51
  -1   0   3  764.46   21.48
  -1   0   4  543.01   15.54
  -1   0   4  532.05   16.04
   1   0  -4  526.46   14.66
  -1   0   4  517.44   14.43
   1   0  -4  525.00   15.32
  -1   0   4  516.83   15.05
  -1   0   5  343.42   16.68
  -1   0   5  359.46   18.25
   1   0  -5  383.88   18.31
  -1   0   5  355.19   17.00
   1   0  -5  371.53   18.30
  -1   0   5  339.21   16.72
   1   0  -5  407.81   20.43
  -1   0   5  325.52   16.13
  -1   0   6  127.47   13.27
  -1   0   6  152.74   10.74
   1   0  -6  155.32    9.56
  -1   0   6  151.24    9.18
   1   0  -6  165.40   10.71
  -1   0   6  118.80    7.89
  -1   0   6  151.12   11.69
  -1   0   7   77.43    9.29
  -1   0   7  102.40   10.21
   1   0  -7   84.37    7.66
  -1   0   7  103.26    9.20
   1   0  -7   81.04   11.57
  -1   0   7  123.90   13.45
  -1   0   8   60.24    8.31
  -1   0   8   74.49    9.10
   1   0  -8   98.45   10.44
  -1   0   8   75.00    8.10
   1   0  -8  112.69   22.16
  -1   0   8  102.78   13.63
  -1   0   9  486.89   17.96
   1   0  -9  339.27   12.51
  -1   0   9  394.07   14.24
   1   0  -9  366.68   15.51
  -1   0   9  423.01   17.62
  -1   0  10   72.25   11.73
  -1   0  10   75.18   11.38
   1   0 -10  115.35   24.73
  -1   0  10   72.74   12.69
  -1   0  11   45.23    7.23
   1   0 -11   32.68    7.27
  -1   0  11   55.55   10.45
   1   0 -12    7.25    3.61
  -1   0  12    4.42    4.41
   1  -1  12   19.01   10.22
   1  -1  12   25.26    9.67
  -1   1 -11   18.86    6.91
  -1   1 -11   37.96    9.90
   1  -1  11   34.85   10.09
  -1   1 -10   42.91   11.46
  -1   1 -10   65.04   10.26
   1  -1  10   90.50   13.69
   1  -1   9   17.78    3.73
  -1   1  -9   26.29    7.91
  -1   1  -9   32.14    8.02
   1  -1   9   13.06    6.01
   1  -1   8  139.97   18.97
   1  -1   8  148.84   20.24
  -1   1  -8  140.04   25.77
  -1   1  -8  168.13   31.70
   1  -1   8  147.95   21.30
   1  -1   7   41.08    4.12
   1  -1   7   48.97    5.00
  -1   1  -7   35.83    9.88
  -1   1  -7   53.06    9.76
   1  -1   7   45.32    6.88
   1  -1   6  211.76   15.37
   1  -1   6  206.40   15.11
  -1   1  -6  235.36   19.17
   1  -1   6  199.63   15.16
  -1   1  -6  271.47   29.36
   1  -1   6  214.11   18.29
   1  -1   5 1273.01   32.58
   1  -1   5 1247.33   32.02
  -1   1  -5 1214.98   32.62
   1  -1   5 1244.12   33.20
   1  -1   5 1254.67   34.14
  -1   1  -5 1165.07   31.55
   1  -1   4  427.95   19.78
   1  -1   4  414.67   19.20
  -1   1  -4  332.90   16.70
   1  -1   4  415.27   20.02
  -1   1  -4  315.16   15.80
   1  -1   4  426.40   20.82
  -1   1  -4  314.47   15.85
  -1   1  -3 2783.37   33.94
   1  -1   3 2698.11   33.38
   1  -1   3 2811.69   34.61
   1  -1   2 1491.10   17.10
  -1   1  -2 1618.87   20.32
   1  -1   2 1473.19   18.78
   1  -1   2 1463.57   19.29
   1  -1   1  434.60   11.91
   1  -1   1  459.84   13.12
  -1   1  -1  365.83   11.64
   1  -1   1  432.10   12.47
   1  -1   0  637.54   17.35
  -1   1   0  491.36   13.62
  -1   1   0  616.26   16.56
  -1   1   0  616.01   16.87
  -1   1   2 5461.60   63.28
   1  -1  -2 5622.01   64.56
  -1   1   2 5492.70   62.71
  -1   1   2 5504.31   63.77
  -1   1   3 3495.81   40.96
  -1   1   3 3614.79   42.70
   1  -1  -3 3447.83   40.45
  -1   1   3 3481.30   40.77
   1  -1  -3 3294.18   40.21
  -1   1   4 1465.29   28.15
  -1   1   4 1536.94   30.10
  -1   1   4 1503.13   28.52
  -1   1   4 1483.03   28.72
   1  -1  -4 1602.70   30.65
  -1   1   4 1485.02   28.33
   1  -1  -4 1507.44   29.37
  -1   1   4 1433.81   27.87
  -1   1   5  565.36   41.16
  -1   1   5  607.97   18.41
  -1   1   5  564.86   40.91
  -1   1   5  557.83   40.66
   1  -1  -5  560.86   40.79
  -1   1   5  578.70   41.98
   1  -1  -5  550.84   31.50
  -1   1   5  562.96   40.98
  -1   1   6   27.80    5.77
  -1   1   6   34.18    5.23
  -1   1   6   32.57    3.33
   1  -1  -6   53.05    7.76
  -1   1   6   36.08    3.80
   1  -1  -6   38.95    4.73
  -1   1   7   37.73    6.47
  -1   1   7   30.97    3.87
  -1   1   7   30.54    4.99
   1  -1  -7   35.61    7.12
  -1   1   7   48.51    7.96
  -1   1   8  229.89   32.04
  -1   1   8  202.29   28.05
   1  -1  -8  169.26   23.58
  -1   1   8  231.56   32.93
  -1   1   9   84.92    9.21
  -1   1   9   65.33   13.22
   1  -1  -9   98.49    9.81
  -1   1   9   72.21    8.39
  -1   1  10   66.75    9.76
  -1   1  10   54.68    8.77
   1  -1 -10   84.80   10.90
  -1   1  10   58.75    8.83
  -1   1  11   97.79   10.84
  -1   1  11   74.50    9.23
  -1   1  12   24.79    9.37
  -1   1  12   17.28    7.48
  -1   2 -12   72.68    9.85
   1  -2  12   64.06   10.52
  -1   2 -11   23.98    6.51
  -1   2 -11   38.71    7.40
   1  -2  11   36.06    8.83
  -1   2 -10   88.35   19.93
  -1   2 -10  130.57   21.49
   1  -2  10  109.62   19.85
  -1   2  -9   71.10   16.48
  -1   2  -9   81.52   14.91
   1  -2   9  152.61   19.58
   1  -2   8   61.17    6.00
   1  -2   8   61.93    6.11
  -1   2  -8   52.58    7.15
  -1   2  -8   43.08    8.42
   1  -2   8   53.26    8.65
   1  -2   7  107.23    9.16
   1  -2   7  106.64    8.82
  -1   2  -7   95.09    9.09
  -1   2  -7  152.08   17.14
   1  -2   7  104.68   11.35
   1  -2   6    5.31    1.10
   1  -2   6   10.16    1.65
  -1   2  -6    6.56    2.56
   1  -2   6    5.15    2.60
  -1   2  -6   14.48    4.25
   1  -2   6   11.19    8.66
   1  -2   5  118.54    5.73
  -1   2  -5   95.33    4.82
  -1   2  -5  105.72    6.38
   1  -2   5  116.40    6.96
  -1   2  -5  116.59   13.43
   1  -2   5  111.04    8.44
  -1   2  -5   77.27    5.81
   1  -2   4 1054.57   12.68
  -1   2  -4  985.51   12.01
  -1   2  -4  993.35   14.59
   1  -2   4 1029.00   14.62
  -1   2  -4 1023.12   15.75
   1  -2   4 1089.62   17.27
  -1   2  -4  946.02   44.59
   1  -2   3 3983.18   45.74
  -1   2  -3 4120.84   47.28
  -1   2  -3 4137.12   49.07
  -1   2  -3 4140.05   49.28
   1  -2   3 3974.81   47.92
  -1   2  -3 3937.76   46.96
   1  -2   2  559.64   15.96
  -1   2  -2  532.88   14.71
  -1   2  -2  532.93   15.44
   1  -2   2  557.27   16.22
  -1   2  -2  537.90   16.01
   1  -2   2  571.38   16.17
   1  -2   2  579.04   17.49
   1  -2   1 2341.51   28.93
   1  -2   1 2291.52   27.87
  -1   2  -1 2150.73   25.50
   1  -2   1 2373.94   27.97
   1  -2   1 2385.57   28.94
  -1   2  -1 2125.40   25.89
   1  -2   0  164.25    6.18
   1  -2   0  171.06    5.03
  -1   2   1  228.72    7.40
  -1   2   1  269.55   10.10
   1  -2  -1  245.09    7.91
  -1   2   1  242.94    6.62
  -1   2   1  249.31    6.92
   1  -2  -1  260.90    8.10
   1  -2  -2   73.08    5.95
  -1   2   2   64.47    9.21
   1  -2  -2   52.04    3.69
  -1   2   2   56.93    2.41
  -1   2   2   56.01    2.71
   1  -2  -2   65.81    3.66
  -1   2   2   61.36    3.04
   1  -2  -3   97.16    6.23
  -1   2   3  128.91   14.67
  -1   2   3  139.69    7.42
  -1   2   3  152.74    9.11
  -1   2   3  140.68    7.07
   1  -2  -3   91.77    5.39
  -1   2   3  143.49    7.78
   1  -2  -4  976.13   20.38
  -1   2   4  930.88   20.71
  -1   2   4  934.49   18.86
   1  -2  -4  952.56   18.88
  -1   2   4  913.15   18.01
   1  -2  -4  918.27   19.87
  -1   2   4  953.07   19.37
   1  -2  -5   99.66    8.68
  -1   2   5   74.87    8.77
  -1   2   5   69.41    8.31
  -1   2   5   93.28    8.20
   1  -2  -5  115.58    9.41
  -1   2   5   91.62    7.40
   1  -2  -5  122.90   10.34
  -1   2   5   80.88    6.79
  -1   2   6  560.46   21.94
  -1   2   6  453.33   16.66
  -1   2   6  514.75   19.56
   1  -2  -6  457.16   17.29
   1  -2  -6  505.17   19.37
  -1   2   7   34.78    6.49
  -1   2   7   36.49    6.13
  -1   2   7   34.66    6.63
  -1   2   8   30.30    7.35
  -1   2   8   13.59    4.70
  -1   2   8   21.24    5.20
  -1   2   9   57.78   10.61
  -1   2   9   49.31    9.12
  -1   2   9   43.22    7.76
  -1   2   9   49.02    8.98
  -1   2  10   17.70    7.40
  -1   2  10    5.43    2.71
  -1   2  10    8.49    4.38
  -1   2  10   15.58    5.81
  -1   2  11    9.32    5.70
  -1   2  11    9.61    5.19
  -1   3 -12   22.61    7.26
   1  -3  12    6.75    5.75
  -1   3 -11   28.30    8.99
  -1   3 -11   51.84   13.12
   1  -3  11   58.29   12.56
  -1   3 -10   15.28    4.78
  -1   3 -10   28.23    7.57
   1  -3  10   14.65    6.61
  -1   3  -9  483.48   17.74
  -1   3  -9  503.47   19.54
   1  -3   9  489.30   20.54
   1  -3   8  208.12    8.12
   1  -3   8  233.19    8.81
  -1   3  -8  237.76   10.77
  -1   3  -8  250.45   21.29
   1  -3   8  230.44   12.65
   1  -3   7  518.89   17.97
  -1   3  -7  528.61   18.34
  -1   3  -7  484.65   18.30
  -1   3  -7  546.61   29.53
   1  -3   7  526.66   21.91
  -1   3  -6   22.82    2.18
  -1   3  -6   34.03    4.31
   1  -3   6   65.01    4.90
  -1   3  -6   33.64    5.39
   1  -3   6   79.39    7.49
   1  -3   5   20.36    1.86
  -1   3  -5   22.54    2.29
  -1   3  -5   18.88    2.44
   1  -3   5   13.39    2.20
  -1   3  -5   28.70    4.31
   1  -3   5   21.66    5.64
   1  -3   4 1463.89   27.53
  -1   3  -4 1468.28   27.57
  -1   3  -4 1474.29   29.07
   1  -3   4 1417.19   27.77
  -1   3  -4 1461.29   31.06
   1  -3   4 1366.57   26.78
   1  -3   4 1486.36   30.23
   1  -3   3  461.67   13.21
  -1   3  -3  575.76   16.09
  -1   3  -3  568.69   16.77
  -1   3  -3  569.75   17.05
   1  -3   3  443.29   14.57
  -1   3  -3  548.20   16.07
  -1   3  -2 2107.21   25.81
   1  -3   2 2346.91   29.32
   1  -3   2 2308.35   28.00
  -1   3  -2 2142.85   26.78
   1  -3   1 5985.28   69.69
   1  -3   1 5888.28   68.93
  -1   3  -1 5970.39   68.58
   1  -3   1 5828.41   67.02
  -1   3  -1 5985.60   69.51
   1  -3   0  247.87    8.35
  -1   3   0  327.70   11.67
   1  -3   0  214.85    7.42
  -1   3   0  301.41    8.66
   1  -3   0  232.19    6.84
   1  -3   0  251.66    8.58
  -1   3   0  301.15    9.52
   1  -3  -1 2194.16   27.95
  -1   3   1 1979.13   25.02
  -1   3   1 2082.18   26.99
  -1   3   1 2062.48   24.18
   1  -3  -1 2121.30   24.72
   1  -3  -1 2160.91   26.53
  -1   3   1 2032.96   25.09
   1  -3  -2    4.28    2.19
  -1   3   2   20.54    2.87
  -1   3   2   20.82    2.47
  -1   3   2   21.01    3.17
  -1   3   2   16.37    2.27
   1  -3  -2    7.51    2.92
  -1   3   2   19.02    2.36
   1  -3  -3  281.56   16.76
  -1   3   3  257.41   16.97
  -1   3   3  269.27   15.73
  -1   3   3  306.19   18.82
  -1   3   3  266.84   15.29
  -1   3   3  279.49   16.35
   1  -3  -3  288.59   17.95
  -1   3   3  273.23   15.86
   1  -3  -4  436.51   29.40
  -1   3   4  419.87   24.13
  -1   3   4  485.17   28.98
  -1   3   4  422.28   23.92
  -1   3   4  467.30   26.81
   1  -3  -4  439.78   25.17
  -1   3   4  425.37   24.35
   1  -3  -5  293.47   12.84
  -1   3   5  313.50   13.39
  -1   3   5  262.25   25.00
  -1   3   5  306.54   12.63
   1  -3  -5  319.22   13.06
  -1   3   5  279.35   11.05
   1  -3  -6  137.10   14.42
  -1   3   6  134.64   14.77
  -1   3   6  149.00   16.03
   1  -3  -6  121.55   12.99
  -1   3   7  217.76   23.55
  -1   3   7  208.13   22.48
  -1   3   7  216.23   23.01
  -1   3   7  227.82   24.08
  -1   3   8   24.60    6.11
  -1   3   8   23.01    6.61
  -1   3   8   47.55   11.07
  -1   3   8   26.41    6.44
  -1   3   9   45.48    9.28
  -1   3   9   49.86   10.43
  -1   3   9   27.52    6.23
  -1   3   9   66.24   12.87
  -1   3  10   16.68    6.26
  -1   3  10   17.90    7.16
  -1   3  10    5.88    3.45
  -1   4 -13   17.99    6.25
   1  -4  13   19.77    9.83
  -1   4 -12   16.18    6.11
  -1   4 -12   36.88   10.23
  -1   4 -11   31.59    6.93
  -1   4 -11   16.87    5.31
   1  -4  11   26.01    9.61
  -1   4 -10   24.80    5.85
  -1   4 -10   35.92    9.38
   1  -4  10   34.79    8.71
   1  -4   9   76.09   11.10
  -1   4  -9   86.50   13.65
  -1   4  -9  106.32   15.76
   1  -4   9   75.09   15.14
   1  -4   8  293.90   11.33
  -1   4  -8  274.18   10.75
  -1   4  -8  288.51   13.67
  -1   4  -8  274.94   12.86
   1  -4   8  281.01   14.48
   1  -4   7  598.48   21.02
  -1   4  -7  604.19   21.26
  -1   4  -7  641.55   23.50
  -1   4  -7  621.33   23.83
   1  -4   7  621.07   25.31
   1  -4   6 1929.82   57.11
  -1   4  -6 1921.32   56.85
  -1   4  -6 2071.34   62.07
   1  -4   6 1789.37   53.76
  -1   4  -6 1999.91   60.46
   1  -4   6 2042.80   62.37
   1  -4   5  227.32   13.22
  -1   4  -5  242.66   14.14
  -1   4  -5  228.96   14.14
   1  -4   5  225.62   13.95
   1  -4   5  230.03   15.12
   1  -4   4 1965.31   37.21
  -1   4  -4 1777.80   33.72
  -1   4  -4 1788.14   35.20
   1  -4   4 1849.33   35.82
   1  -4   4 1775.77   34.28
   1  -4   3  487.31   23.35
  -1   4  -3  483.66   23.00
  -1   4  -3  494.37   24.03
   1  -4   3  454.39   21.92
   1  -4   3  475.69   23.65
  -1   4  -3  479.44   23.33
  -1   4  -2 2145.16   26.86
   1  -4   2 2175.48   28.10
  -1   4  -2 2116.59   26.19
   1  -4   2 2183.71   26.91
   1  -4   2 2137.82   27.29
  -1   4  -2 2179.69   27.63
   1  -4   1 2542.06   32.08
  -1   4  -1 2412.68   30.09
   1  -4   1 2314.45   29.62
  -1   4  -1 2437.99   29.22
   1  -4   1 2427.01   29.17
   1  -4   1 2465.89   30.65
  -1   4  -1 2468.29   30.52
   1  -4   0 2817.75   53.28
  -1   4   0 2946.25   56.03
  -1   4   0 2828.75   52.08
   1  -4   0 2712.94   49.94
   1  -4   0 2771.73   51.76
  -1   4   0 2732.54   51.00
   1  -4  -1 1856.97   36.11
  -1   4   1 1805.82   35.93
  -1   4   1 1762.36   32.87
   1  -4  -1 1951.81   36.17
   1  -4  -1 2032.94   38.52
  -1   4   1 1725.46   32.92
   1  -4  -2 1019.64   28.14
  -1   4   2 1223.02   31.65
  -1   4   2 1287.64   33.67
   1  -4  -2 1055.53   28.19
  -1   4   2 1340.66   35.33
   1  -4  -3  537.60   18.24
  -1   4   3  402.93   30.46
  -1   4   3  389.91   28.37
  -1   4   3  412.05   30.27
   1  -4  -3  519.99   17.22
  -1   4   3  401.36   29.37
   1  -4  -4   70.74   11.35
  -1   4   4   77.22    8.68
  -1   4   4   63.41    8.38
  -1   4   4   88.47    8.77
   1  -4  -4   67.23   13.82
  -1   4   4   81.12    7.42
   1  -4  -5   28.66    5.96
  -1   4   5    7.85    4.65
  -1   4   5   13.07    3.16
  -1   4   5   24.07    5.49
   1  -4  -5   18.99    4.06
   1  -4  -6  317.24   13.22
  -1   4   6  334.28   14.53
  -1   4   6  295.48   12.24
   1  -4  -6  334.51   13.04
  -1   4   7  150.30   11.09
  -1   4   7  156.39   11.65
  -1   4   7  157.96   10.97
  -1   4   7  149.57   10.52
  -1   4   8  211.48   14.44
  -1   4   8  200.81   14.81
  -1   4   8  201.89   14.49
  -1   4   8  178.24   13.33
  -1   4   9   34.02    6.60
  -1   4   9   25.83    8.36
  -1   4   9   25.48    7.40
  -1   4   9   24.59    7.52
  -1   4  10    2.33    2.91
  -1   5 -13   14.89    5.66
   1  -5  13   23.11   11.53
  -1   5 -12  136.84   10.25
   1  -5  12  182.26   15.42
  -1   5 -11  142.99   10.00
  -1   5 -11  137.90   23.27
   1  -5  11  135.34   13.79
  -1   5 -10  547.78   28.68
  -1   5 -10  464.93   26.75
   1  -5  10  551.43   31.63
  -1   5  -9  174.31   18.80
  -1   5  -9  197.46   29.21
   1  -5   9  142.31   17.70
   1  -5   8   81.66    8.53
  -1   5  -8   60.84    6.47
  -1   5  -8   80.14    9.41
  -1   5  -8  102.06   14.85
   1  -5   8  102.26   14.34
   1  -5   7  592.27   23.76
  -1   5  -7  582.55   23.27
  -1   5  -7  647.98   26.83
  -1   5  -7  616.48   27.83
   1  -5   7  603.86   26.36
   1  -5   6  703.10   22.01
  -1   5  -6  679.79   21.17
  -1   5  -6  733.53   24.33
  -1   5  -6  683.04   22.60
   1  -5   6  767.56   27.08
   1  -5   5 1656.89   43.60
  -1   5  -5 1840.08   48.09
  -1   5  -5 1849.75   49.27
  -1   5  -5 1831.26   48.83
   1  -5   5 1829.71   49.58
   1  -5   4 2486.56   64.66
  -1   5  -4 2292.38   59.63
  -1   5  -4 2258.98   59.43
  -1   5  -4 2268.80   59.31
   1  -5   4 2208.40   57.63
   1  -5   4 2522.06   66.34
   1  -5   3 1319.02   35.51
  -1   5  -3 1509.64   39.83
  -1   5  -3 1528.02   40.36
   1  -5   3 1246.45   33.22
   1  -5   3 1293.52   35.25
  -1   5  -3 1427.53   37.94
   1  -5   2 4352.51   81.27
  -1   5  -2 4157.93   76.75
   1  -5   2 4276.99   78.91
   1  -5   2 4496.10   83.62
  -1   5  -2 4183.64   77.72
   1  -5   1  576.15   43.04
  -1   5  -1  591.41   19.13
  -1   5  -1  590.82   16.40
   1  -5   1  559.54   40.54
   1  -5   1  600.35   17.05
  -1   5  -1  562.03   40.87
   1  -5   0   63.71    8.90
  -1   5   0   71.04    7.38
  -1   5   0   63.44    4.56
   1  -5   0   80.59    5.42
   1  -5   0   94.23    7.09
  -1   5   0   66.67    5.09
   1  -5  -1  980.56   27.57
  -1   5   1 1107.82   31.64
  -1   5   1 1025.04   26.98
   1  -5  -1  961.94   25.34
   1  -5  -1  981.23   26.41
  -1   5   1  996.34   26.76
   1  -5  -2 1127.28   37.30
  -1   5   2 1079.36   34.87
  -1   5   2  920.31   27.53
  -1   5   2 1044.35   31.54
   1  -5  -2 1142.53   34.71
  -1   5   2  996.54   30.35
   1  -5  -3 1025.87   41.51
  -1   5   3  995.09   41.22
  -1   5   3  861.47   33.57
  -1   5   3  966.80   38.12
   1  -5  -3 1012.81   40.07
  -1   5   3  949.23   37.45
   1  -5  -4  253.06   31.06
  -1   5   4  270.91   15.58
  -1   5   4  247.17    9.93
  -1   5   4  312.07   13.13
   1  -5  -4  238.56   11.83
  -1   5   4  270.18   11.48
   1  -5  -5   93.05   17.02
  -1   5   5  111.88   13.46
  -1   5   5   50.96   13.57
  -1   5   5  113.28   12.55
   1  -5  -5   93.70   13.53
   1  -5  -6   20.24    5.83
  -1   5   6   27.05    7.83
  -1   5   6   30.55    7.28
   1  -5  -6   30.03    6.36
   1  -5  -7   20.60    5.86
  -1   5   7   27.07    8.54
  -1   5   7    7.18    3.52
  -1   5   7   10.30    4.24
  -1   5   8   86.82   10.79
  -1   5   8   75.86   12.37
  -1   5   9   -1.43    3.77
  -1   5   9   16.11    7.11
  -1   6 -13   42.17   12.72
   1  -6  13   42.07    9.62
  -1   6 -12   31.31    8.61
  -1   6 -12   29.32   11.09
   1  -6  12   30.36   11.76
  -1   6 -11   68.48   12.33
  -1   6 -11   31.72    7.92
   1  -6  11   56.72   13.89
   1  -6  10  210.11   12.14
  -1   6 -10  269.14   16.40
  -1   6 -10  279.26   35.85
   1  -6  10  224.62   16.47
   1  -6   9  166.81   17.44
  -1   6  -9   87.17   13.50
  -1   6  -9   95.83   15.72
   1  -6   9  163.13   19.46
   1  -6   8  138.02   19.25
  -1   6  -8  116.33   16.28
  -1   6  -8  133.44   19.10
  -1   6  -8  150.36   28.31
   1  -6   8  129.77   20.87
   1  -6   7   58.77    6.66
  -1   6  -7   49.32    5.59
  -1   6  -7   50.38    6.77
  -1   6  -7   63.44   10.63
   1  -6   6   17.34    4.34
  -1   6  -6    7.77    6.40
  -1   6  -6    6.82    1.70
   1  -6   6   24.60    9.18
   1  -6   5  600.09   19.70
  -1   6  -5  649.52   22.13
  -1   6  -5  612.77   20.56
   1  -6   5  588.68   20.71
   1  -6   4  576.13   19.38
  -1   6  -4  536.00   19.25
  -1   6  -4  545.08   18.28
   1  -6   4  557.71   19.73
   1  -6   3 2133.86   67.45
  -1   6  -3 2180.55   66.11
  -1   6  -3 2089.44   62.38
   1  -6   3 1914.80   57.22
   1  -6   3 2170.53   65.29
   1  -6   2 1852.83   56.21
  -1   6  -2 1770.48   54.72
  -1   6  -2 1628.00   48.71
   1  -6   2 1751.37   52.33
   1  -6   2 1832.81   55.20
  -1   6  -2 1604.59   48.33
   1  -6   1  742.39   24.98
  -1   6  -1  622.19   23.03
  -1   6  -1  774.15   23.86
   1  -6   1  708.69   22.09
   1  -6   1  697.61   22.05
  -1   6  -1  719.24   22.82
   1  -6   0  220.58   25.05
  -1   6   0  238.38   20.04
  -1   6   0  216.08   16.15
   1  -6   0  182.62   13.76
   1  -6   0  193.42   14.88
  -1   6   0  219.57   16.69
  -1   6   1    8.93    5.87
  -1   6   1   23.25    3.02
   1  -6  -1   16.67    2.55
   1  -6  -1   19.77    3.06
  -1   6   1   19.12    3.33
   1  -6  -2  243.08   29.46
  -1   6   2  216.76   19.98
  -1   6   2  186.47   13.91
  -1   6   2  200.98   15.42
   1  -6  -2  235.55   17.98
  -1   6   2  190.74   14.75
   1  -6  -3  439.80   23.87
  -1   6   3  447.97   25.90
  -1   6   3  365.24   18.38
  -1   6   3  436.89   22.25
   1  -6  -3  413.76   20.93
  -1   6   3  381.47   19.62
   1  -6  -4  140.96   22.83
  -1   6   4  158.98   19.52
  -1   6   4  153.30   16.47
   1  -6  -4  136.02   19.50
   1  -6  -5  232.94   31.21
  -1   6   5  219.41   16.24
  -1   6   5  183.78   11.01
   1  -6  -5  234.90   13.00
   1  -6  -6   58.29   10.76
  -1   6   6   58.01   11.38
  -1   6   6   56.37   10.56
   1  -6  -7  100.29    9.45
  -1   6   7   50.33    8.32
  -1   6   8   36.52    7.91
  -1   6   8   37.11    7.76
  -1   7 -13   30.45   11.96
   1  -7  13   52.46   10.99
  -1   7 -12    2.81    2.40
  -1   7 -12   17.20    8.82
   1  -7  12   18.50    8.53
  -1   7 -11   79.16    7.10
  -1   7 -11   96.41   16.14
   1  -7  11   80.81   10.30
   1  -7  10   25.29    5.04
  -1   7 -10   23.19    5.19
  -1   7 -10   31.75    7.87
   1  -7  10   34.60    9.77
   1  -7   9  281.14   18.02
  -1   7  -9  307.96   20.36
  -1   7  -9  359.20   35.09
   1  -7   9  343.78   24.77
   1  -7   8 1177.98   39.22
  -1   7  -8 1233.74   41.95
  -1   7  -8 1230.16   43.91
   1  -7   8 1213.62   43.11
   1  -7   7 1937.23   71.50
  -1   7  -7 1991.69   74.06
  -1   7  -7 1947.64   72.45
   1  -7   7 1970.70   73.99
   1  -7   6 1419.92   56.14
  -1   7  -6 1317.39   52.73
  -1   7  -6 1393.84   55.89
   1  -7   6 1420.25   57.17
   1  -7   5  255.44   20.07
  -1   7  -5  294.06   23.09
  -1   7  -5  270.47   21.08
   1  -7   5  236.19   18.88
   1  -7   4   93.86    9.80
  -1   7  -4   83.47   10.97
  -1   7  -4   81.58    8.38
   1  -7   4   95.29   10.39
   1  -7   3  828.92   30.48
  -1   7  -3  807.47   30.58
  -1   7  -3  759.44   27.33
   1  -7   3  838.07   30.53
   1  -7   2  360.43   14.96
  -1   7  -2  375.09   18.32
  -1   7  -2  328.25   12.91
   1  -7   2  310.85   12.26
   1  -7   2  334.04   13.93
   1  -7   1  660.29   31.49
  -1   7  -1  885.80   37.62
  -1   7  -1  842.97   33.45
   1  -7   1  604.49   24.30
   1  -7   1  598.34   24.53
   1  -7   0  411.92   42.20
  -1   7   0  398.90   32.13
  -1   7   0  382.82   28.39
   1  -7   0  380.69   28.04
   1  -7   0  435.32   18.16
  -1   7   0  330.61   24.83
  -1   7   1 1020.96   41.38
  -1   7   1  944.66   35.12
   1  -7  -1  877.17   32.48
   1  -7  -1  957.83   35.99
  -1   7   1  834.19   31.45
   1  -7  -2  286.26   13.01
  -1   7   2  206.60   23.03
  -1   7   2  205.26   20.98
  -1   7   2  223.98   23.20
   1  -7  -2  286.16   10.79
  -1   7   2  204.29   21.32
   1  -7  -3   95.92   16.56
  -1   7   3   89.42   10.62
  -1   7   3  106.64    9.61
   1  -7  -3   94.39   13.34
   1  -7  -4  104.56   22.24
  -1   7   4  116.48   12.14
  -1   7   4  104.33   15.44
   1  -7  -4   91.17   16.26
   1  -7  -5  131.76   23.54
  -1   7   5  123.41   11.14
   1  -7  -6   26.06    8.37
  -1   7   6   18.37    6.75
   1  -7  -7   46.01    7.67
  -1   7   7   48.05    8.50
  -1   8 -12   71.51    8.23
  -1   8 -12   59.21    8.49
   1  -8  12   78.16   13.18
  -1   8 -11   63.13    6.56
  -1   8 -11   74.37   13.99
   1  -8  11   96.51   13.09
   1  -8  10    3.93    2.59
  -1   8 -10   13.65    3.82
  -1   8 -10   22.75    6.17
   1  -8  10   12.76    9.59
   1  -8   9  105.68   15.66
  -1   8  -9  115.84   20.10
  -1   8  -9  139.78   18.11
   1  -8   9  132.74   13.23
   1  -8   8   66.54    7.31
  -1   8  -8   97.80    9.69
  -1   8  -8   87.12   12.15
   1  -8   8   98.56   12.49
   1  -8   7  264.71   12.10
  -1   8  -7  218.55   23.92
  -1   8  -7  276.63   25.74
   1  -8   7  270.44   14.78
   1  -8   6  146.19   20.93
  -1   8  -6  188.10   27.08
  -1   8  -6  181.88   25.45
   1  -8   6  156.93   22.93
   1  -8   5  657.85   33.49
  -1   8  -5  663.00   34.62
  -1   8  -5  646.48   32.80
   1  -8   5  650.26   33.93
   1  -8   4  506.63   21.64
  -1   8  -4  525.61   24.46
  -1   8  -4  492.22   19.77
   1  -8   4  532.70   22.20
   1  -8   3  208.60   26.66
  -1   8  -3  189.30   21.23
  -1   8  -3  199.05    9.39
   1  -8   3  175.92   18.26
   1  -8   2   18.93    5.70
  -1   8  -2   35.44    9.21
  -1   8  -2   15.02    4.80
   1  -8   2    5.29    2.99
   1  -8   1  391.22   21.98
  -1   8  -1  384.22   22.11
  -1   8  -1  358.67   18.70
   1  -8   1  329.27   16.91
   1  -8   1  340.96   17.93
   1  -8   0  570.18   22.04
  -1   8   0  498.10   22.92
  -1   8   0  473.93   16.83
   1  -8   0  411.45   14.30
   1  -8   0  500.21   17.90
   1  -8  -1  406.23   26.28
  -1   8   1  381.31   26.51
  -1   8   1  338.96   20.95
   1  -8  -1  368.23   22.83
   1  -8  -2  147.53   21.12
  -1   8   2  164.98   15.01
  -1   8   2  147.44    9.16
   1  -8  -2  118.50   12.61
   1  -8  -3  126.79   21.10
  -1   8   3  161.78   14.14
   1  -8  -4   17.37    5.73
  -1   8   4   17.57    8.82
   1  -8  -5   30.66    8.77
  -1   8   5   41.20   10.15
  -1   9 -12  160.71   16.40
  -1   9 -12  138.77   31.69
   1  -9  12  161.97   18.90
  -1   9 -11   67.42    8.24
  -1   9 -11   76.76   16.41
   1  -9  11   70.80   11.22
   1  -9  10  147.33   18.94
  -1   9 -10  166.99   13.19
  -1   9 -10  169.42   23.12
   1  -9  10  213.08   18.68
   1  -9   9   15.85    4.31
  -1   9  -9    3.75    5.47
  -1   9  -9    3.93    3.58
   1  -9   9   17.02    9.34
   1  -9   8    4.72    3.78
  -1   9  -8    3.15    4.13
  -1   9  -8   23.20    6.85
   1  -9   8   16.66    6.18
   1  -9   7   65.71   11.45
  -1   9  -7   71.99    9.74
  -1   9  -7   62.66   11.77
   1  -9   7   53.97   11.79
   1  -9   6  185.14   40.66
  -1   9  -6  189.54   15.14
  -1   9  -6  180.51   34.19
   1  -9   6  175.59   16.66
   1  -9   5  542.97   34.94
  -1   9  -5  507.10   33.35
  -1   9  -5  551.38   34.25
   1  -9   5  543.09   33.99
   1  -9   4  670.70   25.13
  -1   9  -4  632.96   25.07
  -1   9  -4  610.04   21.70
   1  -9   4  647.03   24.40
   1  -9   3  383.92   31.27
  -1   9  -3  472.33   30.74
  -1   9  -3  488.78   30.13
   1  -9   3  405.35   25.43
   1  -9   2  382.63   25.08
  -1   9  -2  315.69   23.19
  -1   9  -2  278.84   17.81
   1  -9   2  333.42   21.38
   1  -9   1  120.04   16.29
  -1   9  -1  147.55   14.51
  -1   9  -1  124.47   13.21
   1  -9   1  103.55   11.59
   1  -9   0   39.74   10.75
  -1   9   0   49.46   11.53
  -1   9   0   50.27    7.99
   1  -9   0   24.68    4.64
   1  -9  -1   85.37   16.10
  -1   9   1   72.77   12.48
   1  -9  -1   80.87    9.60
   1  -9  -2   58.01   13.92
  -1   9   2   90.28   12.43
   1  -9  -3   36.32    6.43
  -1   9   3   14.72    7.51
   1  -9  -4   23.35    9.46
  -1   9   4   37.58   12.43
  -1  10 -11   51.82    6.46
  -1  10 -11   52.00   11.49
   1 -10  11   45.28   12.81
   1 -10  10  214.40   16.07
  -1  10 -10  231.83   17.01
  -1  10 -10  203.64   26.57
   1 -10  10  236.18   20.92
   1 -10   9  268.71   18.55
  -1  10  -9  299.37   21.26
  -1  10  -9  270.95   28.63
   1 -10   9  358.29   25.64
   1 -10   8  224.99   20.86
  -1  10  -8  284.15   19.39
  -1  10  -8  309.32   24.17
   1 -10   8  260.83   18.38
   1 -10   7   55.87   10.34
  -1  10  -7   68.03   10.73
  -1  10  -7   61.13   13.03
   1 -10   7   64.21    9.29
   1 -10   6   46.26   12.94
  -1  10  -6   45.33    8.94
  -1  10  -6   38.72    8.65
   1 -10   6   25.63    6.43
   1 -10   5   92.25   21.08
  -1  10  -5   81.13   14.41
  -1  10  -5  103.73   15.99
   1 -10   5   92.56   14.77
   1 -10   4  248.97   22.63
  -1  10  -4  244.76   19.31
  -1  10  -4  257.26   15.91
   1 -10   4  218.62   14.22
   1 -10   3  321.35   31.72
  -1  10  -3  297.99   16.54
  -1  10  -3  322.46   13.16
   1 -10   3  314.56   13.37
   1 -10   2  311.41   37.22
  -1  10  -2  362.99   17.70
  -1  10  -2  330.82   12.94
   1 -10   2  317.82   12.72
   1 -10   1  281.97   33.00
  -1  10  -1  296.39   21.09
   1 -10   1  247.53   15.37
   1 -10   0   95.44   21.74
  -1  10   0  110.04   14.18
   1 -10  -1   25.67    8.24
  -1  10   1   19.19    8.42
   1 -10  -2   16.06    6.89
  -1  10   2    7.61    6.69
   1 -11  10   34.71   12.31
  -1  11 -10   36.83    8.62
  -1  11 -10   37.05   12.54
   1 -11  10   84.42   13.82
   1 -11   9   95.59   21.12
  -1  11  -9  122.08   14.55
  -1  11  -9  131.96   19.23
   1 -11   9  140.87   16.83
   1 -11   8  265.72   19.42
  -1  11  -8  284.01   21.14
  -1  11  -8  248.22   28.07
   1 -11   8  262.37   19.36
   1 -11   7  179.93   17.41
  -1  11  -7  189.50   16.95
  -1  11  -7  165.05   19.68
   1 -11   7  154.77   13.59
   1 -11   6  288.28   27.92
  -1  11  -6  300.07   24.18
  -1  11  -6  289.68   20.08
   1 -11   6  294.10   20.79
   1 -11   5   14.98    6.03
  -1  11  -5   15.94    6.74
   1 -11   5   16.32    5.44
   1 -11   4   14.14    5.97
  -1  11  -4   16.74    6.86
  -1  11  -4   17.81    5.43
   1 -11   4    9.48    3.38
   1 -11   3   72.51   13.96
  -1  11  -3   81.75   11.77
   1 -11   3   93.01    8.34
   1 -11   2   59.29   15.24
  -1  11  -2   80.22   10.65
   1 -11   1   96.63   22.47
  -1  11  -1  128.05   17.64
  -1  11   0  120.90   14.22
   1 -12   8   23.30    9.30
  -1  12  -8   32.50   12.05
  -1  12  -8   21.57    8.39
   1 -12   8   23.29    8.95
   1 -12   7  169.20   31.12
  -1  12  -7  214.40   16.81
  -1  12  -7  199.42   22.08
   1 -12   7  263.62   16.72
   1 -12   6   60.44   15.57
  -1  12  -6   71.30   11.80
  -1  12  -6   63.61    9.16
   1 -12   6   95.39    8.83
   1 -12   5  172.18   26.10
  -1  12  -5  225.57   17.66
   1 -12   5  212.34   13.54
   1 -12   4   78.96   17.60
  -1  12  -4   58.31    9.87
   1 -12   3   86.40   19.84
  -1  12  -3   48.34   10.69
  -2 -12   6    6.81    5.38
   2  12  -6    9.45    5.91
   2  12  -6    5.20    4.26
  -2 -12   7    5.30    5.52
   2  12  -7   10.04    7.65
   2  12  -7    4.39    4.25
  -2 -12   8   11.87    6.30
   2  12  -8   16.03    8.02
   2  12  -8   17.03    8.12
  -2 -11   2    5.42    3.49
   2  11  -2   17.79    7.79
   2  11  -2   19.12    6.57
   2  11  -3   62.39   10.81
   2  11  -3   53.95   10.93
  -2 -11   4   65.83    9.32
   2  11  -4   56.61   10.17
   2  11  -4   69.83    9.67
  -2 -11   5  110.58   14.33
   2  11  -5   87.56   11.79
   2  11  -5   89.22    9.98
  -2 -11   6   22.00    7.54
   2  11  -6    1.26    5.78
   2  11  -6    0.06    4.78
  -2 -11   6    0.40    2.25
  -2 -11   7   35.51    7.18
   2  11  -7   34.36    7.77
   2  11  -7   39.17    7.25
  -2 -11   7   39.14    6.00
  -2 -11   8   45.77    8.03
   2  11  -8   61.35    8.80
   2  11  -8   45.99    8.48
  -2 -11   8   49.80    7.73
  -2 -11   9   12.98    7.49
   2  11  -9    6.33    4.32
   2  11  -9    6.09    4.28
  -2 -11   9    5.56    4.43
  -2 -11  10   54.94    9.17
   2  11 -10   29.24    7.38
   2  11 -10   35.49    9.78
  -2 -11  10   53.76    8.50
  -2 -11  11   21.84    7.58
   2  11 -11   41.69    6.76
   2  11 -11   53.78    9.60
  -2 -11  11   31.22   11.59
  -2 -10  -1   11.21    4.38
   2  10   1   35.34   10.09
  -2 -10   0   40.31    8.97
   2  10   0   57.58   13.75
   2  10   0   34.88    8.03
  -2 -10   1   41.38   10.04
   2  10  -1   11.26    6.93
   2  10  -1   30.19    8.71
  -2 -10   2   41.72    7.60
   2  10  -2   57.70   13.68
   2  10  -2   49.93    8.47
  -2 -10   3   15.55    5.00
   2  10  -3    2.98    6.38
   2  10  -3    6.51    4.26
  -2 -10   4   27.54    7.26
   2  10  -4   19.56    8.85
   2  10  -4   16.32    6.74
  -2 -10   5  134.63   11.89
   2  10  -5  114.50   21.59
   2  10  -5  112.02   15.12
  -2 -10   5  110.84   13.45
  -2 -10   6  146.52    9.71
   2  10  -6  143.36   11.58
   2  10  -6  122.32   10.00
  -2 -10   6  130.85    7.49
  -2 -10   7  187.59   15.27
   2  10  -7  182.08   14.58
   2  10  -7  153.89   12.20
  -2 -10   7  174.48   12.43
  -2 -10   8   47.83   10.97
   2  10  -8   56.87   11.27
   2  10  -8   47.94    9.77
  -2 -10   8   26.62    6.69
  -2 -10   9  123.56   11.04
   2  10  -9  141.84   12.45
   2  10  -9  122.56   11.68
  -2 -10   9  134.91   10.99
  -2 -10  10   55.88    7.84
   2  10 -10   35.96    9.05
   2  10 -10   52.48    7.55
  -2 -10  10   65.79   11.61
  -2 -10  11   14.41    6.99
   2  10 -11    8.81    4.48
   2  10 -11   10.35    6.90
  -2 -10  11   40.25   12.37
  -2 -10  12   16.04    6.33
   2  10 -12   14.57    7.67
  -2 -10  12   23.31    9.14
  -2  -9  -2    2.73    2.62
   2   9   2   13.35    7.12
   2   9   2    3.09    6.00
  -2  -9  -1   31.43   11.09
   2   9   1    9.61    7.38
   2   9   1   17.88    5.13
  -2  -9   0   50.92    9.81
   2   9   0   49.95   11.13
   2   9   0   57.65    9.12
  -2  -9   1   11.71    5.36
   2   9  -1   11.53    6.92
   2   9  -1   16.71    5.35
  -2  -9   2  150.30   12.31
   2   9  -2  238.51   18.61
   2   9  -2  201.14   13.86
  -2  -9   3   19.84    6.43
   2   9  -3   19.41    7.42
   2   9  -3   31.43    9.13
  -2  -9   3   18.66    3.89
  -2  -9   4   14.92    6.02
   2   9  -4   21.68    7.55
   2   9  -4   13.37    5.66
  -2  -9   4    4.80    2.05
  -2  -9   5   40.12   10.18
   2   9  -5   68.24   10.01
   2   9  -5   57.37   10.92
  -2  -9   5   41.69    8.71
  -2  -9   6  153.05   10.93
   2   9  -6  114.11   13.99
   2   9  -6  115.34   13.65
  -2  -9   6  138.67   15.06
  -2  -9   7  185.81   13.51
   2   9  -7  174.90   12.52
   2   9  -7  207.87   14.31
  -2  -9   7  177.06   12.23
  -2  -9   8  163.05   12.14
   2   9  -8  150.37   10.78
   2   9  -8  162.00   12.05
  -2  -9   8  179.71   13.48
  -2  -9   9  132.35    8.62
   2   9  -9  128.74    8.84
   2   9  -9  147.05   10.92
  -2  -9   9  149.65   11.24
  -2  -9  10   82.64    8.90
   2   9 -10   83.19    7.16
   2   9 -10  107.44   12.13
  -2  -9  10   89.53   11.15
  -2  -9  11   20.81    6.86
   2   9 -11   35.86    8.21
   2   9 -11   31.31    9.34
  -2  -9  11   28.31   11.06
  -2  -9  12   41.98    8.80
   2   9 -12   37.23    8.98
  -2  -9  12   49.66   13.81
  -2  -9  13   29.59   10.20
   2   9 -13   16.29    7.35
  -2  -9  13   25.69   11.25
  -2  -8  -4    7.30    3.81
   2   8   4    8.04    6.75
   2   8   4   10.98    6.57
  -2  -8  -3   16.59    5.35
   2   8   3   19.40    8.57
   2   8   3   12.06    5.53
  -2  -8  -2   26.58    5.94
   2   8   2   33.31    8.80
   2   8   2   26.22    6.75
  -2  -8  -1   56.45    9.46
   2   8   1   62.60    9.88
   2   8   1   56.85    9.39
  -2  -8   0   33.00    9.99
   2   8   0   45.47   13.44
   2   8   0   18.20    6.29
  -2  -8   1  318.48   21.17
   2   8  -1  336.57   24.38
   2   8  -1  328.58   21.64
  -2  -8   2  727.34   26.94
   2   8  -2  748.47   28.33
   2   8  -2  787.28   28.87
  -2  -8   2  727.11   23.68
  -2  -8   3  348.84   15.29
   2   8  -3  311.00   14.78
   2   8  -3  322.49   13.76
  -2  -8   3  319.32   11.43
  -2  -8   3  329.30   11.86
  -2  -8   4  536.74   28.89
   2   8  -4  555.44   30.57
   2   8  -4  568.24   30.06
  -2  -8   4  470.90   23.67
  -2  -8   4  536.51   26.94
  -2  -8   5    8.22    5.41
   2   8  -5   39.70   11.00
   2   8  -5   26.92    7.75
  -2  -8   5   16.72    6.57
  -2  -8   6    4.57    4.94
   2   8  -6    8.41    5.18
   2   8  -6    5.66    5.40
  -2  -8   6    9.74    4.82
  -2  -8   7   63.75   11.44
   2   8  -7   82.64   13.73
   2   8  -7   87.91   18.76
  -2  -8   7   75.59   12.28
  -2  -8   8  180.86   34.53
   2   8  -8  154.68   14.50
   2   8  -8  176.50   16.36
  -2  -8   8  187.07   14.07
  -2  -8   9  269.97   17.16
   2   8  -9  297.00   16.93
   2   8  -9  298.76   18.57
  -2  -8   9  283.84   18.66
  -2  -8  10  144.90   11.44
   2   8 -10  156.66   10.04
   2   8 -10  178.95   13.96
  -2  -8  10  173.35   14.76
  -2  -8  11  192.87   13.52
   2   8 -11  175.67   11.56
   2   8 -11  179.17   13.98
  -2  -8  11  207.33   16.95
  -2  -8  12   47.16    6.31
   2   8 -12   56.17   15.81
  -2  -8  12   55.90    8.97
  -2  -8  13    8.10    4.63
   2   8 -13   -1.80    4.62
  -2  -8  13    6.72    6.94
  -2  -7  -5    6.03    3.51
   2   7   5   12.96    8.93
   2   7   5    7.52    5.24
  -2  -7  -4   14.04    4.99
   2   7   4   37.35   12.27
   2   7   4   17.67    7.75
  -2  -7  -3   33.17    7.43
   2   7   3   72.62   11.91
   2   7   3   58.72   11.81
  -2  -7  -2    6.82    4.66
   2   7   2   18.63    7.73
   2   7   2   22.15    8.17
  -2  -7  -1   29.78    7.53
   2   7   1   36.67   12.11
   2   7   1   40.64   12.05
  -2  -7   0   46.45    9.51
   2   7   0   45.52   10.56
   2   7   0   61.66   11.08
  -2  -7   1   84.34   10.30
   2   7  -1   96.19   12.17
   2   7  -1   97.02   11.50
   2   7  -2  180.05   19.57
   2   7  -2  176.11   18.96
  -2  -7   2  203.57    8.20
  -2  -7   2  213.31    8.51
  -2  -7   3  501.41   22.17
   2   7  -3  496.59   23.62
   2   7  -3  480.28   21.51
  -2  -7   3  451.12   18.23
  -2  -7   3  455.07   18.71
  -2  -7   4  499.02   22.53
   2   7  -4  418.91   41.86
   2   7  -4  436.69   20.06
  -2  -7   4  442.81   18.27
  -2  -7   4  482.59   20.25
  -2  -7   5  174.19   15.44
   2   7  -5  195.59   17.19
   2   7  -5  193.47   16.02
  -2  -7   5  162.62   13.51
  -2  -7   6   50.48    7.91
   2   7  -6   57.34    9.42
   2   7  -6   82.83   11.33
  -2  -7   6   69.33    8.99
  -2  -7   7  213.82   11.27
   2   7  -7  174.87   18.50
   2   7  -7  198.43   11.00
  -2  -7   7  196.34   42.01
  -2  -7   8   40.59   10.53
   2   7  -8   42.16   10.25
   2   7  -8   38.88    9.97
  -2  -7   8   37.39   10.51
  -2  -7   9    5.64    6.33
   2   7  -9    3.52    2.27
   2   7  -9    4.08    4.56
  -2  -7   9   10.00    6.68
  -2  -7  10  343.17   19.83
   2   7 -10  330.92   17.73
   2   7 -10  336.55   19.94
  -2  -7  10  374.46   22.31
  -2  -7  11  212.89   10.56
   2   7 -11  225.75    9.10
   2   7 -11  260.41   13.40
  -2  -7  11  193.16   11.99
  -2  -7  12  236.09   16.19
   2   7 -12  231.98   26.33
  -2  -7  12  229.17   19.14
  -2  -7  13    0.39    2.81
  -2  -7  13   18.96    7.67
   2   6   6    1.15    4.68
   2   6   6    2.77    4.84
  -2  -6  -5    7.51    2.72
   2   6   5    2.91    5.41
   2   6   5   17.82    7.88
  -2  -6  -4   52.98    8.52
   2   6   4   80.16   12.51
   2   6   4   85.33   12.90
  -2  -6  -3  236.89   26.22
   2   6   3  220.49   14.86
   2   6   3  251.37   16.39
  -2  -6  -2  185.84   26.60
   2   6   2  146.50   17.79
   2   6   2  152.78   17.74
  -2  -6  -1  610.59   24.73
   2   6   1  627.76   28.47
   2   6   1  598.51   24.89
  -2  -6   0  103.95   11.93
   2   6   0   38.96    7.30
   2   6   0   43.85    7.43
  -2  -6   1  437.21   18.20
   2   6  -1  486.58   20.12
  -2  -6   2   78.31    8.30
   2   6  -2   63.24    7.65
   2   6  -2   79.96    9.04
  -2  -6   2   69.49    6.61
  -2  -6   2   76.94    6.85
  -2  -6   3   -0.70    4.67
   2   6  -3   -5.85    5.02
   2   6  -3   13.22    5.55
  -2  -6   3    3.59    1.85
  -2  -6   3    7.22    3.56
  -2  -6   4  527.80   18.48
   2   6  -4  503.70   18.77
   2   6  -4  531.67   18.52
  -2  -6   4  480.01   39.36
  -2  -6   4  472.76   34.71
  -2  -6   5  650.06   22.31
   2   6  -5  703.86   24.46
   2   6  -5  652.18   22.01
  -2  -6   5  654.52   21.45
  -2  -6   6 1284.46   45.65
   2   6  -6 1318.86   46.42
   2   6  -6 1306.14   46.83
  -2  -6   6 1298.72   46.38
  -2  -6   7  554.54   24.34
   2   6  -7  494.41   20.22
   2   6  -7  547.41   23.03
   2   6  -7  528.08   24.16
  -2  -6   7  539.97   24.03
  -2  -6   8   52.53    8.40
   2   6  -8   39.60    4.94
  -2  -6   8   38.91    4.81
   2   6  -8   45.59    7.20
  -2  -6   8   50.60    8.33
  -2  -6   9  158.72   22.81
   2   6  -9  150.26   20.74
  -2  -6   9  125.84   17.54
   2   6  -9  152.26   21.97
  -2  -6   9  155.56   23.31
  -2  -6  10   19.20    5.42
   2   6 -10   27.32    5.74
   2   6 -10   12.21    5.34
  -2  -6  10   22.55    6.40
  -2  -6  11   44.61    7.81
   2   6 -11   32.84    5.16
   2   6 -11   41.36    8.33
  -2  -6  12   11.03    4.29
   2   6 -12    6.55    3.47
  -2  -6  12   32.75   10.13
  -2  -6  13   80.84    7.84
   2   6 -13   64.82   19.45
  -2  -6  13  106.09   13.18
   2   6 -14   26.83   10.91
  -2  -6  14   45.30    8.57
  -2  -5  -7    8.56    3.43
   2   5   7   30.55    8.82
   2   5   7   28.12    8.87
  -2  -5  -6    7.82    2.14
   2   5   6   19.10    5.56
   2   5   6   14.94    8.31
  -2  -5  -5   28.89    7.44
   2   5   5   50.64   10.33
  -2  -5  -4    9.89    4.29
  -2  -5  -4   16.31    7.21
   2   5   4   16.97    9.04
  -2  -5  -3    9.54    3.56
  -2  -5  -3    9.91    4.92
   2   5   3   10.76    8.40
  -2  -5  -2   76.64   14.15
  -2  -5  -2   88.05   11.08
   2   5   2   74.16    9.32
  -2  -5  -1  253.36   21.64
  -2  -5  -1  248.68   21.73
   2   5   1  263.28   26.52
  -2  -5   0  811.20   26.14
   2   5   0  735.58   26.94
   2   5   0  775.28   26.13
  -2  -5   1  712.76   23.45
   2   5  -1  797.60   26.36
  -2  -5   1  653.52   19.29
  -2  -5   1  692.28   20.42
  -2  -5   2  367.13   21.98
   2   5  -2  311.29   19.75
   2   5  -2  333.82   21.15
  -2  -5   2  346.21   20.21
  -2  -5   2  357.47   20.32
  -2  -5   3  236.63   14.72
   2   5  -3  288.82   17.80
   2   5  -3  294.45   18.64
  -2  -5   3  234.90   13.75
  -2  -5   3  240.81   14.17
  -2  -5   4   48.87    5.22
   2   5  -4   61.37    4.94
   2   5  -4   60.78    5.48
   2   5  -4   57.08    5.87
  -2  -5   4   57.66    4.60
  -2  -5   4   57.63    5.55
  -2  -5   5  125.70   10.22
   2   5  -5  166.99   10.25
   2   5  -5  182.36   12.09
   2   5  -5  186.03   13.08
  -2  -5   5  136.89    9.05
  -2  -5   5  120.97    8.55
  -2  -5   6 1013.98   32.35
   2   5  -6  881.82   26.91
   2   5  -6  892.07   27.99
   2   5  -6  906.66   29.20
  -2  -5   6  964.79   31.34
  -2  -5   7  178.50   16.45
   2   5  -7  331.27   13.08
   2   5  -7  298.78   12.82
  -2  -5   7  160.65   16.56
  -2  -5   8  670.47   28.21
   2   5  -8  607.03   24.34
  -2  -5   8  635.22   25.30
   2   5  -8  617.92   26.56
  -2  -5   8  663.42   29.67
  -2  -5   9  430.55   18.14
   2   5  -9  396.43   15.24
  -2  -5   9  390.50   15.21
   2   5  -9  420.89   18.71
  -2  -5  10   28.25    7.02
   2   5 -10    0.57    1.04
  -2  -5  10    9.18    2.05
   2   5 -10    7.80    4.04
  -2  -5  10   23.14    9.26
  -2  -5  11  156.28   10.16
   2   5 -11  142.24   24.64
  -2  -5  11  138.91   17.24
  -2  -5  12   23.54    5.69
   2   5 -12   23.08    8.59
  -2  -5  12   22.36    9.59
   2   5 -13   18.75    6.62
  -2  -5  13   24.84   10.39
   2   5 -14    5.25    2.40
  -2  -5  14   15.44    7.61
   2   4   8   17.76    7.13
  -2  -4  -7    6.15    2.98
  -2  -4  -7    8.31    4.10
   2   4   7   18.05    8.09
  -2  -4  -6   46.58   12.68
  -2  -4  -6   70.07   11.72
   2   4   6   78.93   13.54
  -2  -4  -5  292.38   19.65
  -2  -4  -5  340.15   22.63
   2   4   5  275.74   19.88
   2   4   5  243.94   15.04
  -2  -4  -4  102.29   18.33
  -2  -4  -4  123.05   18.76
   2   4   4  137.12   20.57
   2   4   4  122.92   16.72
   2   4   4  114.59   15.66
  -2  -4  -3  177.86   17.33
  -2  -4  -3  178.53   15.00
   2   4   3  183.86   15.43
  -2  -4  -2   13.67    3.15
  -2  -4  -2   11.69    5.80
   2   4   2   22.66    5.58
  -2  -4  -1  267.72   20.46
  -2  -4  -1  258.68   20.76
   2   4   1  245.73   19.51
  -2  -4   0  466.31   27.03
  -2  -4   0  505.40   29.73
   2   4   0  533.01   30.95
  -2  -4   1  212.24   11.44
  -2  -4   1  232.76   12.70
  -2  -4   1  218.98   11.48
  -2  -4   1  222.13   10.46
  -2  -4   1  233.24   11.02
  -2  -4   2 2193.12   42.32
   2   4  -2 2147.02   41.31
   2   4  -2 2158.39   41.19
   2   4  -2 2173.08   42.19
   2   4  -2 2256.19   43.75
  -2  -4   2 2113.10   40.67
  -2  -4   2 2117.32   39.34
  -2  -4   2 2170.93   40.36
  -2  -4   3  878.58   19.01
   2   4  -3  934.69   19.02
   2   4  -3  945.89   19.95
   2   4  -3  962.88   20.84
  -2  -4   3  852.90   16.95
  -2  -4   3  855.54   17.70
  -2  -4   4 2015.89   39.80
   2   4  -4 1808.35   34.42
   2   4  -4 1742.42   33.76
   2   4  -4 1671.05   33.40
  -2  -4   4 1840.18   35.21
  -2  -4   4 1973.76   38.23
  -2  -4   5  109.78    8.38
   2   4  -5  232.80   13.56
   2   4  -5  240.57   14.26
   2   4  -5  238.76   15.38
  -2  -4   5  111.95   12.42
  -2  -4   5  135.54    9.56
  -2  -4   6  116.88    8.57
   2   4  -6  117.76    7.18
   2   4  -6  104.09    6.66
   2   4  -6  107.10    8.33
  -2  -4   6  131.25   11.02
  -2  -4   7  756.73   25.33
   2   4  -7  745.08   22.64
  -2  -4   7  674.89   20.59
   2   4  -7  747.28   25.34
  -2  -4   7  691.77   23.71
  -2  -4   8 1265.26   44.95
   2   4  -8 1268.81   43.34
  -2  -4   8 1209.21   41.38
  -2  -4   8 1355.91   49.28
  -2  -4   9   74.37   10.01
   2   4  -9   41.33    4.40
  -2  -4   9   50.98    5.54
   2   4  -9   37.10    6.03
  -2  -4   9   40.42    6.59
  -2  -4  10  351.01   14.39
   2   4 -10  367.94   12.09
  -2  -4  10  335.35   11.17
   2   4 -10  388.90   15.86
  -2  -4  10  384.15   19.52
  -2  -4  11  120.30   13.62
   2   4 -11   92.12   14.77
  -2  -4  11  130.94   16.42
  -2  -4  12    7.28    4.80
   2   4 -12    5.58    1.92
  -2  -4  12    8.26    6.18
   2   4 -13    7.44    3.48
  -2  -4  13    3.66    5.79
   2   4 -14   13.94    5.23
  -2  -4  14   21.97   10.54
  -2  -3  -9    2.18    3.21
   2   3   9   -1.04    5.91
  -2  -3  -8   21.68    7.25
   2   3   8    7.67    5.62
  -2  -3  -7    4.45    1.96
  -2  -3  -7    9.01    3.99
   2   3   7    2.92    5.90
   2   3   7    6.42    3.07
  -2  -3  -6  185.72   20.17
  -2  -3  -6  211.65   15.52
   2   3   6  191.15   15.85
   2   3   6  174.27   15.08
  -2  -3  -5   70.68   19.81
  -2  -3  -5   87.69   19.57
   2   3   5  113.65   18.26
   2   3   5   85.28   18.24
   2   3   5  111.60   15.71
  -2  -3  -4  163.32   13.22
  -2  -3  -4  171.61   14.80
   2   3   4  178.88   15.67
   2   3   4  149.39   12.00
   2   3   4  167.14   12.80
  -2  -3  -3 1149.58   36.33
   2   3   3  995.15   30.54
  -2  -3  -3 1167.03   37.29
   2   3   3 1142.56   36.66
   2   3   3 1053.96   31.49
   2   3   3 1117.76   33.24
  -2  -3  -2  777.92   21.69
   2   3   2  689.78   19.27
   2   3   2  705.63   22.31
   2   3   2  713.92   18.42
   2   3   2  667.99   17.24
  -2  -3  -1 1062.15   21.59
   2   3   1  960.64   19.59
  -2  -3  -1 1048.66   22.39
   2   3   1 1066.43   23.13
  -2  -3  -1 1011.87   21.25
  -2  -3   0  277.83   14.06
   2   3   0  270.74   13.77
  -2  -3   0  285.72   14.64
   2   3   0  263.43   14.12
  -2  -3   0  242.84   12.64
  -2  -3   1  757.24   22.11
   2   3  -1  747.46   21.35
  -2  -3   1  773.18   22.37
   2   3  -1  776.91   22.76
  -2  -3   1  735.16   19.86
  -2  -3   1  744.15   20.18
   2   3  -2 1474.84   19.78
   2   3  -2 1569.47   20.44
   2   3  -2 1609.83   22.16
  -2  -3   2 1593.01   19.57
  -2  -3   2 1690.86   21.12
  -2  -3   3 1177.07   17.43
   2   3  -3 1292.35   16.92
   2   3  -3 1196.32   16.18
   2   3  -3 1310.80   19.28
  -2  -3   3 1102.02   14.99
  -2  -3   3 1177.16   17.08
  -2  -3   4 2017.61   39.08
   2   3  -4 1865.95   34.92
   2   3  -4 1853.02   34.87
   2   3  -4 1856.01   36.29
  -2  -3   4 1893.44   36.56
  -2  -3   4 1852.69   35.41
  -2  -3   4 2034.66   39.71
   2   3  -5 1599.89   31.37
   2   3  -5 1712.05   31.87
   2   3  -5 1727.97   32.36
   2   3  -5 1808.06   35.67
  -2  -3   6 1894.75   50.37
   2   3  -6 1696.87   44.80
   2   3  -6 1808.61   46.32
   2   3  -6 1772.74   45.49
  -2  -3   7  126.21   11.88
   2   3  -7  152.17   12.17
   2   3  -7  172.18   12.56
   2   3  -7  176.73   14.20
  -2  -3   7  115.56   11.80
  -2  -3   8  394.94   16.92
   2   3  -8  368.28   12.67
  -2  -3   8  405.70   14.03
   2   3  -8  391.68   16.72
  -2  -3   8  414.65   17.90
  -2  -3   9   65.23    8.67
   2   3  -9   74.03    7.44
  -2  -3   9   58.88    5.84
   2   3  -9   87.67   17.81
  -2  -3   9   64.95   10.79
  -2  -3  10  172.60   18.67
   2   3 -10  159.84   31.02
  -2  -3  10  168.47   21.16
  -2  -3  11   10.00    5.16
   2   3 -11   15.96    6.16
  -2  -3  11   10.06    6.83
  -2  -3  12  103.31    8.75
   2   3 -12  108.89   16.32
  -2  -3  12  128.42   13.83
   2   3 -13    9.13    3.77
  -2  -3  13   22.15    9.22
  -2  -2 -10    8.22    3.46
   2   2  10    1.64    5.92
  -2  -2  -9   81.93    9.61
   2   2   9  102.00   12.33
  -2  -2  -8   10.93    4.25
   2   2   8   46.67   12.95
   2   2   8   19.02    5.57
   2   2   7   56.52   11.00
  -2  -2  -7   75.24   10.49
   2   2   7   48.42   11.56
   2   2   7   73.23    9.20
  -2  -2  -6   24.61    6.15
   2   2   6   27.04    6.14
  -2  -2  -6   35.57   11.46
   2   2   6   49.60   14.42
   2   2   6   18.84    6.23
   2   2   6   29.19    7.34
  -2  -2  -5  163.58   13.40
   2   2   5  139.36   10.87
  -2  -2  -5  159.95   25.79
   2   2   5  161.21   15.36
   2   2   5  128.04   15.66
   2   2   5  158.75   12.88
  -2  -2  -4  738.34   23.08
   2   2   4  692.86   21.57
  -2  -2  -4  750.84   25.22
   2   2   4  724.96   24.70
   2   2   4  662.78   20.45
   2   2   4  724.69   22.58
  -2  -2  -3  362.03   20.79
   2   2   3  344.46   19.91
  -2  -2  -3  382.25   22.71
   2   2   3  353.99   21.95
   2   2   3  307.63   17.72
   2   2   3  347.79   19.96
  -2  -2  -2 1885.37   35.90
   2   2   2 1768.86   33.72
   2   2   2 1759.12   34.98
  -2  -2  -2 1653.20   32.21
   2   2   2 1761.77   32.67
   2   2   2 1748.95   32.54
  -2  -2  -1 3191.74   38.47
   2   2   1 3064.79   36.94
   2   2   1 2961.04   37.03
   2   2   1 3248.37   40.56
   2   2   1 3108.66   35.72
  -2  -2  -1 3093.11   35.54
  -2  -2   0  302.39    9.76
   2   2   0  212.81    7.32
  -2  -2   0  302.35   10.12
   2   2   0  215.02    7.43
   2   2   0  223.54    8.79
  -2  -2   0  269.89    8.88
   2   2   0  231.56    6.60
  -2  -2   0  289.75    8.04
  -2  -2   1  441.68   13.21
  -2  -2   1  440.34   13.24
  -2  -2   1  420.33   12.80
  -2  -2   1  437.90   12.28
   2   2  -2 3092.46   37.46
   2   2  -2 3225.33   38.38
   2   2  -2 3170.04   38.84
   2   2  -2 3151.62   37.54
  -2  -2   2 3183.51   37.60
  -2  -2   3  499.33   15.42
   2   2  -3  467.56   14.36
  -2  -2   3  506.00   14.19
   2   2  -3  465.56   13.09
   2   2  -3  484.58   14.77
  -2  -2   3  519.65   15.51
   2   2  -3  476.57   14.17
  -2  -2   3  512.39   15.21
  -2  -2   4 3268.59   40.43
   2   2  -4 3485.13   40.21
   2   2  -4 3480.15   40.15
  -2  -2   4 3172.84   38.81
   2   2  -4 3515.21   43.10
  -2  -2   4 3133.78   38.35
  -2  -2   5  976.04   20.84
   2   2  -5  873.56   18.47
   2   2  -5  926.77   16.98
   2   2  -5  936.21   20.29
  -2  -2   5  905.35   18.82
  -2  -2   6 1610.36   43.18
   2   2  -6 1558.30   41.40
   2   2  -6 1604.02   42.70
  -2  -2   6 1344.34   37.35
  -2  -2   7 1443.26   44.36
   2   2  -7 1422.17   43.03
   2   2  -7 1569.63   47.84
  -2  -2   7 1546.99   48.73
  -2  -2   8  273.40   13.20
   2   2  -8  236.66   20.39
  -2  -2   8  295.88   14.25
  -2  -2   9  125.62   14.54
  -2  -2   9  112.93   11.04
  -2  -2   9  114.17   11.17
   2   2  -9  135.21   21.19
  -2  -2   9  129.91   15.39
  -2  -2  10  136.99   15.45
  -2  -2  10  110.73   11.30
  -2  -2  10  127.85   13.06
   2   2 -10  168.11   22.23
  -2  -2  10  113.68   14.36
  -2  -2  11  339.59   20.38
   2   2 -11  363.74   22.25
  -2  -2  11  297.74   19.69
  -2  -2  12   86.60    7.53
   2   2 -12   88.83   16.14
  -2  -2  12   95.44   11.83
   2   2 -13   30.96    7.32
  -2  -2  13   30.34    8.49
  -2  -1 -10    8.02    3.24
   2   1  10   -0.88    6.09
   2   1  10   12.45    5.70
  -2  -1  -9   54.32    9.26
   2   1   9   48.37    9.63
   2   1   9   62.55   11.05
  -2  -1  -8  165.55   19.30
   2   1   8  138.70   11.67
   2   1   8  133.29   10.87
  -2  -1  -7 1502.69  283.59
   2   1   7 1436.99   50.39
   2   1   7 1506.90  284.15
   2   1   6  633.96   23.68
  -2  -1  -6  772.58   31.08
   2   1   6  643.32   27.17
   2   1   6  699.21   28.08
  -2  -1  -5  982.29   33.86
   2   1   5  922.74   31.85
  -2  -1  -5 1019.13   38.53
   2   1   5  922.08   34.06
   2   1   5  845.37   29.59
   2   1   5  966.87   34.47
  -2  -1  -4  412.02   23.26
   2   1   4  497.10   27.94
  -2  -1  -4  390.56   23.80
   2   1   4  519.51   31.17
   2   1   4  501.88   29.00
  -2  -1  -3  280.66   13.65
   2   1   3  268.90   13.09
  -2  -1  -3  257.42   13.44
   2   1   3  253.59   13.22
   2   1   3  249.06   13.84
   2   1   3  290.36   14.77
  -2  -1  -3  258.73   12.86
   2   1   2  174.57    5.94
   2   1   2  172.16    9.25
   2   1   2  168.79    6.20
   2   1   2  181.86    9.03
   2   1   2  178.97    6.13
  -2  -1  -2  258.03   12.69
  -2  -1  -1 2904.97   34.46
   2   1   1 2955.92   35.08
   2   1   1 3075.79   37.74
   2   1   1 3041.17   37.55
  -2  -1  -1 2828.61   34.65
   2   1   1 3012.85   35.22
  -2  -1  -1 2846.62   33.31
  -2  -1   0 2274.22   28.34
   2   1   0 2017.83   25.28
  -2  -1   0 2196.36   27.45
   2   1   0 2183.88   25.84
  -2  -1   0 2310.35   27.13
  -2  -1   3 9048.35  416.63
  -2  -1   3 8954.94  103.08
   2   1  -3 8946.71  103.20
  -2  -1   4  170.18    8.13
   2   1  -4  165.02    6.77
   2   1  -4  178.23    7.04
  -2  -1   4  179.95    6.46
   2   1  -4  178.88   12.55
  -2  -1   5  115.78    8.26
   2   1  -5   97.75    6.05
   2   1  -5   88.10    5.78
  -2  -1   5  101.64    5.87
  -2  -1   5   93.91   10.14
  -2  -1   6 1320.29   36.02
   2   1  -6 1308.33   34.94
   2   1  -6 1356.75   36.39
  -2  -1   6 1175.35   31.57
  -2  -1   7  535.96   19.21
   2   1  -7  506.68   16.87
  -2  -1   7  518.47   15.51
  -2  -1   7  523.93   15.72
   2   1  -7  530.85   25.42
  -2  -1   8  288.79   23.27
  -2  -1   8  256.35   18.83
  -2  -1   8  253.08   18.69
   2   1  -8  240.81   18.80
  -2  -1   8  278.58   23.45
  -2  -1   9  974.65   48.81
  -2  -1   9  919.47   44.47
  -2  -1   9  935.77   45.36
   2   1  -9  928.97   46.22
  -2  -1   9  980.29   50.76
  -2  -1  10  397.43   25.55
  -2  -1  10  379.44   22.97
   2   1 -10  435.23   27.90
  -2  -1  10  380.95   25.76
  -2  -1  11  161.33    8.84
   2   1 -11  169.70   19.94
  -2  -1  11  175.67   11.37
  -2  -1  12   41.25    9.81
   2   1 -12   30.72   11.14
  -2  -1  12   33.01   10.30
   2   1 -13   29.58    9.78
  -2  -1  13   52.90    7.77
  -2   0 -11   32.02   10.50
   2   0  11   43.76   10.10
   2   0  11   30.72   10.63
  -2   0 -10   13.06    4.64
   2   0  10    6.67    5.87
   2   0  10   16.51    6.69
  -2   0  -9   46.19   13.45
   2   0   9   43.26   11.47
   2   0   9   64.50    9.83
  -2   0  -8   25.07    8.01
   2   0   8   31.89    9.75
   2   0   8   28.48    7.62
   2   0   7  182.65   24.66
   2   0   7  191.03   25.83
  -2   0  -7  135.60   23.88
   2   0   7  184.02   27.78
   2   0   7  196.78   27.58
   2   0   6   66.57    6.46
   2   0   6   55.88    5.56
  -2   0  -6  121.31   20.23
   2   0   6   56.82    8.70
   2   0   6   65.54    9.29
   2   0   5  869.20   25.75
   2   0   5  904.57   26.87
  -2   0  -5  725.69   25.13
   2   0   5  930.05   30.23
   2   0   5  929.06   29.83
  -2   0  -4  819.60   21.40
   2   0   4  683.14   17.83
  -2   0  -4  807.72   23.31
   2   0   4  696.83   21.09
   2   0   4  738.33   20.83
  -2   0  -4  788.00   21.62
  -2   0  -3 3312.04   60.39
   2   0   3 2994.68   54.73
   2   0   3 2971.98   55.74
   2   0   3 3120.36   59.22
   2   0   3 3250.97   60.62
  -2   0  -3 3106.81   57.72
   2   0   2  149.94    4.80
   2   0   2  152.29    6.11
   2   0   2  146.89    5.88
   2   0   2  138.19    6.37
   2   0   2  154.61    5.85
  -2   0  -1  212.89    6.82
   2   0   1  204.11    6.33
  -2   0  -1  218.02    8.23
   2   0   1  208.82    7.27
  -2   0  -1  195.50    7.01
  -2   0  -1  185.83    6.05
   2   0   0  263.32    8.24
  -2   0   0  327.86   10.40
   2   0   0  267.31    8.39
  -2   0   0  319.52   10.38
   2   0   0  273.44    8.60
   2   0  -1 1617.34   20.70
  -2   0   1 1623.68   20.16
   2   0  -1 1664.67   20.81
  -2   0   1 1589.19   20.01
   2   0  -1 1672.27   21.00
  -2   0   2  723.48   20.96
   2   0  -2  864.80   24.35
   2   0  -2  903.81   24.47
   2   0  -2  930.68   43.30
   2   0  -2  944.71   44.17
  -2   0   3  907.93   26.09
  -2   0   3  901.60   24.31
   2   0  -3  996.81   12.29
   2   0  -3 1019.03   13.60
  -2   0   3  890.88   24.62
  -2   0   3  881.92   24.71
  -2   0   4 1707.01   23.62
   2   0  -4 1527.97   20.53
  -2   0   4 1653.82   19.39
  -2   0   4 1656.53   19.57
   2   0  -4 1637.27   20.79
  -2   0   4 1652.34   20.96
  -2   0   4 1611.17   21.57
  -2   0   5  432.06   21.97
   2   0  -5  449.30   21.90
  -2   0   5  399.83   19.03
  -2   0   5  397.49   18.70
   2   0  -5  420.60   20.39
  -2   0   5  421.74   20.55
   2   0  -5  448.63   22.22
  -2   0   5  392.05   19.20
  -2   0   6   48.27    3.86
  -2   0   6   69.20    6.74
  -2   0   6   56.45    3.86
  -2   0   6   61.07    4.58
   2   0  -6   75.58    7.51
  -2   0   6   62.91    5.35
   2   0  -6   69.49    6.49
  -2   0   7   12.19    5.54
  -2   0   7   16.03    1.89
  -2   0   7   20.39    3.17
   2   0  -7   25.65    4.41
   2   0  -7   17.12    4.19
  -2   0   8  487.35   22.19
  -2   0   8  442.98   17.76
  -2   0   8  435.89   17.66
   2   0  -8  444.17   19.72
  -2   0   8  478.67   22.09
  -2   0   9   75.17   12.41
  -2   0   9   57.06    8.63
  -2   0   9   63.14    9.81
   2   0  -9   91.77   15.83
  -2   0   9   57.53   12.01
  -2   0  10  174.36   12.19
  -2   0  10  148.70    8.76
   2   0 -10  205.23   20.26
  -2   0  10  177.76   13.84
  -2   0  11   44.59    9.25
   2   0 -11   60.51   15.15
  -2   0  11   67.68   13.64
   2   0 -12   25.48    9.91
  -2   0  12   30.53    9.44
  -2   1 -11   43.27   14.41
   2  -1  11   48.66   10.53
   2  -1  11   73.47   10.63
  -2   1 -10   96.99   21.17
   2  -1  10  101.14   12.28
   2  -1  10  163.65   13.75
  -2   1  -9   38.45    9.48
   2  -1   9   45.24    9.82
  -2   1  -8   98.10   16.76
  -2   1  -8   93.00   11.28
   2  -1   8   80.28   13.83
  -2   1  -7   33.78    7.48
  -2   1  -7   21.63    5.25
   2  -1   7   37.79    8.10
  -2   1  -6   16.11    3.57
  -2   1  -6   24.89    5.06
   2  -1   6    4.83    5.30
  -2   1  -5  965.39   27.36
  -2   1  -5  987.27   27.91
   2  -1   5  997.28   28.26
  -2   1  -4 2961.77   56.31
   2  -1   4 2388.58   45.69
   2  -1   4 2709.35   51.65
  -2   1  -4 2706.33   51.04
  -2   1  -3 6518.69   76.67
  -2   1  -3 6123.79   71.65
  -2   1  -2 2035.49   23.63
  -2   1  -2 2019.87   23.59
   2  -1   2 1969.86   25.26
  -2   1  -2 2066.21   26.08
   2  -1   2 2037.59   26.40
  -2   1  -2 1974.30   25.13
  -2   1  -1 5304.65   61.00
  -2   1  -1 5293.11   62.09
   2  -1   1 4775.59   56.14
   2  -1   1 5079.50   59.43
   2  -1   1 5165.36   60.38
  -2   1  -1 5202.67   60.61
   2  -1   0  308.56    9.37
  -2   1   0  252.37    8.56
   2  -1   0  321.67   10.08
   2  -1   0  318.17   10.15
  -2   1   0  246.47    7.92
  -2   1   1  183.85    7.87
  -2   1   1  187.77    7.04
   2  -1  -1  188.76    6.24
  -2   1   1  170.01    5.50
   2  -1  -1  197.22    6.77
  -2   1   1  150.41    5.68
  -2   1   3 1758.36   22.66
  -2   1   3 1818.40   24.72
  -2   1   3 1755.84   21.61
   2  -1  -3 1942.06   23.52
   2  -1  -3 1947.59   23.29
  -2   1   3 1765.31   21.37
   2  -1  -3 1953.93   25.19
  -2   1   3 1743.34   22.57
  -2   1   4 2197.92   41.74
  -2   1   4 2249.44   41.71
  -2   1   4 2282.42   42.55
   2  -1  -4 2163.32   40.42
  -2   1   4 2266.73   42.26
   2  -1  -4 2105.85   40.34
  -2   1   5 2709.47   70.24
  -2   1   5 2937.42   76.56
  -2   1   5 2760.96   71.03
  -2   1   5 2962.25   76.20
   2  -1  -5 3190.12   82.03
  -2   1   5 2787.63   71.81
   2  -1  -5 2983.35   77.52
  -2   1   6 1395.03   43.14
  -2   1   6 1294.66   38.71
  -2   1   6 1329.90   39.93
   2  -1  -6 1278.96   38.84
  -2   1   6 1276.20   38.54
   2  -1  -6 1294.22   40.28
  -2   1   7   81.27    8.99
  -2   1   7   62.30    5.73
  -2   1   7   63.50    6.95
   2  -1  -7  105.09   17.49
   2  -1  -7   95.58    9.67
  -2   1   8   22.10    5.08
  -2   1   8   23.24    3.29
  -2   1   8   21.72    3.81
   2  -1  -8   23.80    5.11
   2  -1  -8   18.19    4.54
  -2   1   9   89.10   10.18
  -2   1   9   71.84    7.24
   2  -1  -9   99.44   15.89
  -2   1   9  102.18   12.19
  -2   1  10   85.16   11.53
  -2   1  10   69.28    8.79
   2  -1 -10   42.06    8.71
  -2   1  10   83.34   12.41
  -2   1  11   19.04    7.34
   2  -1 -11   15.32    5.30
  -2   1  11   18.15    7.58
   2  -1 -12    5.50    3.78
  -2   1  12    6.08    4.61
   2  -2  12   59.45   10.96
   2  -2  12   53.56    9.84
  -2   2 -11   18.00    8.18
  -2   2 -11   19.52    7.72
   2  -2  11   48.57   10.52
  -2   2 -10    8.75    3.08
  -2   2 -10   23.95    7.97
   2  -2  10    2.06    5.12
  -2   2  -9  175.81   25.99
  -2   2  -9  210.89   13.39
   2  -2   9  222.61   17.15
  -2   2  -8  190.37   26.66
  -2   2  -8  212.20   29.70
   2  -2   8  179.75   26.60
  -2   2  -7  277.38   21.34
  -2   2  -7  325.37   38.12
   2  -2   7  263.65   21.03
  -2   2  -6   72.74    7.42
  -2   2  -6   74.55    9.66
   2  -2   6   81.42    9.14
  -2   2  -5  263.92   16.19
  -2   2  -5  260.49   17.98
   2  -2   5  265.95   16.81
  -2   2  -4  116.13    7.91
   2  -2   4  105.12    7.16
  -2   2  -4  129.72   11.96
   2  -2   4  106.37    7.18
  -2   2  -4  106.86    7.17
  -2   2  -3  372.44   10.27
  -2   2  -3  364.78   10.24
  -2   2  -3  362.28   15.98
   2  -2   3  439.36   14.51
   2  -2   3  478.64   15.49
   2  -2   2 5866.73   67.33
  -2   2  -2 5696.92   65.30
   2  -2   2 5616.33   66.03
  -2   2  -2 5783.56   67.64
   2  -2   2 5565.80   64.95
   2  -2   2 5760.26   67.89
  -2   2  -1  552.27   15.60
  -2   2  -1  412.41   13.29
   2  -2   1  378.28   11.60
   2  -2   1  455.68   13.53
   2  -2   1  475.85   14.70
  -2   2  -1  555.74   16.43
   2  -2   0 5964.03   69.29
  -2   2   0 5923.99   69.25
   2  -2   0 5924.88   67.73
   2  -2   0 5923.71   67.77
  -2   2   0 5809.05   67.71
   2  -2  -1 1516.37   19.88
  -2   2   1 1392.02   18.18
  -2   2   1 1385.12   18.69
   2  -2  -1 1449.88   18.82
   2  -2  -1 1515.50   17.50
   2  -2  -1 1516.94   17.70
  -2   2   1 1467.58   19.21
  -2   2   2   73.97    8.73
  -2   2   2   77.60    4.27
   2  -2  -2   65.35    3.89
   2  -2  -2   63.37    2.17
  -2   2   2   81.94    2.56
  -2   2   2   97.11    5.17
   2  -2  -3  104.09    7.33
  -2   2   3  123.08   14.67
  -2   2   3  138.75    8.38
   2  -2  -3   93.41    5.79
   2  -2  -3   98.58    5.05
  -2   2   3  122.77    6.04
   2  -2  -3  110.09   15.01
  -2   2   3  123.60    6.89
  -2   2   4  348.20   17.38
  -2   2   4  327.40   15.86
  -2   2   4  345.42   17.20
   2  -2  -4  413.13   19.75
  -2   2   4  334.20   15.99
   2  -2  -4  428.53   21.09
  -2   2   4  325.65   16.16
  -2   2   5  332.23   20.74
  -2   2   5  312.09   18.12
  -2   2   5  326.90   19.23
   2  -2  -5  300.92   17.42
  -2   2   5  303.58   17.49
   2  -2  -5  305.15   18.21
  -2   2   6  384.06   16.34
  -2   2   6  360.94   13.43
  -2   2   6  383.89   15.42
   2  -2  -6  359.64   13.67
  -2   2   6  352.76   13.23
   2  -2  -6  343.51   14.75
  -2   2   7  559.50   23.56
  -2   2   7  504.61   20.50
   2  -2  -7  652.22   25.11
   2  -2  -7  595.45   23.87
  -2   2   8  272.53   12.87
  -2   2   8  287.15   12.06
   2  -2  -8  244.95   25.50
   2  -2  -8  250.11   47.86
  -2   2   9   82.62   11.33
  -2   2   9   79.29    9.45
   2  -2  -9   95.79   11.06
  -2   2   9   85.28   10.61
  -2   2  10   32.13    7.88
  -2   2  10   16.16    4.15
  -2   2  10   19.43    5.26
  -2   2  10   26.62    8.06
  -2   2  11   17.95    7.83
  -2   2  11   31.11    8.35
  -2   2  11   12.06    4.77
  -2   3 -12    6.92    2.27
  -2   3 -12   17.87    7.90
   2  -3  12   17.34    6.60
  -2   3 -11    3.57    1.82
  -2   3 -11   13.90    6.88
   2  -3  11   24.79    9.34
  -2   3 -10   19.60    5.23
  -2   3 -10   11.45    4.91
   2  -3  10   28.04    9.99
  -2   3  -9   83.74    8.99
   2  -3   9  115.76   15.13
  -2   3  -8   12.46    3.71
  -2   3  -8   12.47    5.30
   2  -3   8   43.09   12.34
  -2   3  -7 1073.52   43.08
  -2   3  -7 1063.03   43.05
   2  -3   7 1076.76   44.61
  -2   3  -6  386.09   28.81
  -2   3  -6  410.70   30.88
   2  -3   6  456.98   34.86
   2  -3   5  821.39   21.31
  -2   3  -5  919.95   23.72
  -2   3  -5  955.24   26.83
  -2   3  -5  953.75   26.85
   2  -3   5  844.06   24.99
   2  -3   4  524.02   24.47
  -2   3  -4  464.66   21.78
  -2   3  -4  459.27   22.53
   2  -3   4  505.31   24.45
  -2   3  -4  407.98   20.13
   2  -3   4  577.43   28.38
   2  -3   3  207.82   10.88
  -2   3  -3  214.41   10.47
  -2   3  -3  211.67   11.53
   2  -3   3  195.65   10.71
   2  -3   3  206.49   10.56
   2  -3   3  219.18   11.90
   2  -3   2   64.01    4.59
  -2   3  -2   59.48    2.93
  -2   3  -2   76.45    5.82
   2  -3   2   72.03    4.17
  -2   3  -2   73.45    8.47
   2  -3   2   72.10    9.62
  -2   3  -2   56.94    4.67
  -2   3  -1 1554.67   19.87
  -2   3  -1 1571.24   21.89
   2  -3   1 1473.79   19.78
  -2   3  -1 1576.25   19.76
   2  -3   1 1565.63   19.48
  -2   3  -1 1524.84   20.28
   2  -3   0 1686.03   21.98
  -2   3   0 1520.36   20.88
  -2   3   0 1519.71   18.14
   2  -3   0 1637.89   19.36
   2  -3   0 1730.10   22.77
  -2   3   0 1465.95   19.42
   2  -3  -1 2511.43   31.62
  -2   3   1 2495.82   31.62
   2  -3  -1 2446.86   30.71
   2  -3  -1 2514.55   31.28
  -2   3   1 2490.11   31.01
  -2   3   2 1296.52   26.70
   2  -3  -2 1260.34   24.94
  -2   3   2 1317.65   26.00
   2  -3  -3 1270.49   34.48
  -2   3   3 1233.62   33.53
   2  -3  -3 1159.16   30.96
  -2   3   3 1233.40   31.68
  -2   3   3 1172.21   30.19
   2  -3  -3 1297.53   34.77
  -2   3   3 1150.23   30.79
   2  -3  -4   20.36    3.30
  -2   3   4   36.69    3.64
  -2   3   4   38.72    4.73
  -2   3   4   39.96    3.05
  -2   3   4   38.50    3.73
   2  -3  -4   36.90    7.24
  -2   3   4   37.87    3.37
  -2   3   5  256.66   22.37
  -2   3   5  261.19   24.38
  -2   3   5  271.93   11.18
   2  -3  -5  237.20   20.37
  -2   3   6  409.00   41.11
  -2   3   6  397.89   30.10
  -2   3   6  354.63   26.17
  -2   3   6  411.46   40.24
   2  -3  -6  506.61   21.40
  -2   3   7  446.82   24.52
  -2   3   7  437.34   23.21
  -2   3   7  438.30   22.48
   2  -3  -7  407.26   21.91
  -2   3   8   71.47   10.07
  -2   3   8   74.50    9.57
  -2   3   8   83.79   10.31
   2  -3  -8   70.43    9.30
  -2   3   9   97.16    9.88
  -2   3   9  102.84    9.71
  -2   3   9  118.50   10.53
  -2   3   9  103.82    8.97
  -2   3  10   15.56    7.62
  -2   3  10   13.03    4.46
  -2   3  10   21.93    8.02
  -2   3  10   11.08    5.85
  -2   3  11    1.37    3.72
  -2   3  11    7.39    4.36
  -2   4 -12   18.79    8.29
  -2   4 -12   29.00    7.39
   2  -4  12   33.28    9.56
  -2   4 -11   95.57    7.93
   2  -4  11   65.76   12.82
  -2   4 -10   23.74    5.50
  -2   4 -10   43.39    8.91
   2  -4  10   53.49   11.68
  -2   4  -9   12.28    4.27
  -2   4  -9   18.29    7.27
   2  -4   9    6.60    8.64
  -2   4  -8  157.74   22.34
  -2   4  -8  164.38   31.81
   2  -4   8  157.20   23.77
   2  -4   7  468.62   18.15
  -2   4  -7  425.94   16.59
  -2   4  -7  454.82   20.16
  -2   4  -7  446.86   20.49
   2  -4   7  530.32   24.03
   2  -4   6  271.67   10.27
  -2   4  -6  365.77   12.98
  -2   4  -6  399.96   16.46
  -2   4  -6  375.50   16.34
   2  -4   6  280.86   13.47
   2  -4   5 1382.95   36.06
  -2   4  -5 1188.89   31.04
  -2   4  -5 1204.04   33.26
  -2   4  -5 1233.91   33.84
   2  -4   5 1419.40   39.19
   2  -4   4 1290.22   33.87
  -2   4  -4 1369.16   35.75
  -2   4  -4 1417.44   38.25
  -2   4  -4 1269.00   34.65
   2  -4   4 1304.75   35.95
   2  -4   3 1203.53   23.71
  -2   4  -3 1201.05   23.27
  -2   4  -3 1230.82   25.56
  -2   4  -3 1271.36   25.26
   2  -4   3 1170.31   23.20
   2  -4   3 1160.63   24.22
  -2   4  -2 2591.75   48.55
   2  -4   2 2579.82   48.98
   2  -4   2 2652.27   49.41
   2  -4   1   12.16    2.31
  -2   4  -1    8.71    1.74
  -2   4  -1   14.75    3.82
  -2   4  -1   12.60    2.15
   2  -4   1   16.76    1.79
   2  -4   1   10.88    4.82
  -2   4  -1   12.10    2.33
   2  -4   0  379.04   18.72
  -2   4   0  314.42   15.49
  -2   4   0  324.16   16.64
   2  -4   0  373.37   18.48
  -2   4   0  329.86   15.48
   2  -4   0  383.98   18.01
   2  -4   0  403.30   20.13
  -2   4   0  314.66   15.59
   2  -4  -1 2014.77   39.22
  -2   4   1 1975.86   39.01
   2  -4  -1 1747.62   34.15
   2  -4  -1 2023.78   38.93
  -2   4   1 1893.42   36.38
   2  -4  -2 1608.26   43.68
  -2   4   2 1545.33   42.11
   2  -4  -2 1569.20   41.52
  -2   4   2 1511.72   40.05
   2  -4  -3  538.82   18.32
  -2   4   3  578.42   19.97
  -2   4   3  597.83   17.78
  -2   4   3  596.70   17.92
   2  -4  -3  552.24   18.12
  -2   4   3  570.11   18.34
   2  -4  -4  717.16   26.80
  -2   4   4  779.98   29.32
  -2   4   4  670.23   23.51
   2  -4  -4  741.49   27.09
   2  -4  -5  165.72   14.42
  -2   4   5  195.60   16.10
  -2   4   5  175.52   13.18
  -2   4   5  175.32   13.86
   2  -4  -5  148.82   12.02
  -2   4   6  168.68   23.83
  -2   4   6  133.57   18.34
  -2   4   6  173.41   24.41
   2  -4  -6  183.20   30.05
  -2   4   7  128.04   14.87
  -2   4   7  130.89   14.89
  -2   4   7  125.25   13.36
   2  -4  -7  122.33   13.73
  -2   4   8    5.57    6.41
  -2   4   8   11.54    3.92
  -2   4   8    7.93    3.44
   2  -4  -8   14.87    5.12
  -2   4   9   40.36   10.92
  -2   4   9   33.23    8.17
  -2   4   9   28.61    7.89
  -2   4  10   36.25    9.63
  -2   4  10   28.07    7.63
  -2   5 -12   30.89    6.96
  -2   5 -12   36.01    9.37
   2  -5  12   11.98    5.82
  -2   5 -11   21.14    5.00
  -2   5 -11   11.16    3.72
   2  -5  11   36.46   10.60
  -2   5 -10  205.68   10.53
  -2   5 -10  211.31   30.32
   2  -5  10  248.03   15.20
  -2   5  -9  121.49   12.00
  -2   5  -9  119.44   17.13
   2  -5   9  103.73   12.39
   2  -5   8  273.73   13.55
  -2   5  -8  267.41   13.32
  -2   5  -8  294.98   16.98
  -2   5  -8  313.63   29.90
   2  -5   8  261.97   16.79
   2  -5   7   95.08   11.89
  -2   5  -7   98.10    9.49
  -2   5  -7  107.86   11.96
  -2   5  -7  119.56   21.38
   2  -5   7  103.43   13.13
   2  -5   6   15.19    4.01
  -2   5  -6    8.74    2.89
  -2   5  -6    5.80    5.26
  -2   5  -6   14.50    3.68
   2  -5   6   15.92    5.90
   2  -5   5 1569.26   47.23
  -2   5  -5 1574.71   47.07
  -2   5  -5 1562.03   47.92
  -2   5  -5 1501.89   49.99
   2  -5   5 1569.18   48.97
   2  -5   4  766.09   25.34
  -2   5  -4  696.34   19.28
  -2   5  -4  735.30   21.88
  -2   5  -4  728.57   22.89
   2  -5   3 2184.93   57.10
  -2   5  -3 2109.57   54.91
  -2   5  -3 2295.56   60.90
  -2   5  -3 2346.31   61.02
   2  -5   3 2011.02   52.42
   2  -5   3 2172.88   57.58
   2  -5   2 1275.48   34.50
  -2   5  -2 1085.16   30.62
  -2   5  -2 1082.87   29.44
   2  -5   2 1324.96   34.84
   2  -5   2 1348.86   36.72
   2  -5   1  507.24   29.23
  -2   5  -1  795.58   24.16
  -2   5  -1  755.01   20.87
   2  -5   1  498.99   28.08
   2  -5   1  509.28   29.48
  -2   5  -1  704.62   19.76
   2  -5   0  198.56   13.20
  -2   5   0  145.44   11.74
  -2   5   0  164.88    9.57
   2  -5   0  204.50   11.69
   2  -5   0  209.67   12.87
  -2   5   0  161.60   10.52
   2  -5  -1    6.22    2.13
  -2   5   1    8.20    5.41
  -2   5   1    4.42    0.95
   2  -5  -1   11.63    1.22
   2  -5  -1    9.72    4.37
  -2   5   1    4.47    2.68
   2  -5  -2  145.39   18.22
  -2   5   2  175.18   15.83
   2  -5  -2  151.60   12.18
  -2   5   2  154.70   12.37
   2  -5  -3  615.51   25.15
  -2   5   3  661.31   25.36
  -2   5   3  597.90   20.44
  -2   5   3  627.05   21.53
   2  -5  -3  626.52   23.23
   2  -5  -4  392.88   17.98
  -2   5   4  426.97   19.93
  -2   5   4  362.87   13.63
  -2   5   4  391.10   15.03
   2  -5  -4  350.55   16.30
   2  -5  -5  266.08   12.04
  -2   5   5  231.74   25.63
  -2   5   5  188.35   19.28
  -2   5   5  235.45   24.26
   2  -5  -5  250.36   47.72
   2  -5  -6  144.61   22.34
  -2   5   6   92.98   12.36
  -2   5   6  109.39   11.75
   2  -5  -6  131.19   20.62
  -2   5   7   52.54   10.27
  -2   5   7   43.62    8.28
  -2   5   7   55.64    7.53
   2  -5  -7   42.12    7.14
  -2   5   8    9.19    5.13
  -2   5   8   -0.03    3.67
  -2   5   9   17.66    6.00
  -2   5   9   27.34    7.06
  -2   6 -12    0.60    2.31
  -2   6 -12   14.86    6.00
   2  -6  12    0.52    5.98
  -2   6 -11   15.39    4.29
  -2   6 -11   11.64    7.87
   2  -6  11   22.08    9.06
  -2   6 -10   69.55    9.46
  -2   6 -10   58.25   11.87
   2  -6  10   66.95   11.86
   2  -6   9  212.81   11.09
  -2   6  -9  221.78   14.01
  -2   6  -9  206.88   24.75
   2  -6   9  249.11   19.09
   2  -6   8  854.61   28.35
  -2   6  -8  785.64   26.04
  -2   6  -8  918.38   32.08
  -2   6  -8  900.29   32.95
   2  -6   8  901.83   33.38
   2  -6   7 1051.95   39.63
  -2   6  -7  887.72   33.13
  -2   6  -7  990.15   38.38
  -2   6  -7 1013.36   39.36
   2  -6   7 1102.84   43.98
   2  -6   6  320.67   25.87
  -2   6  -6  302.63   22.53
  -2   6  -6  326.27   25.39
  -2   6  -6  330.33   25.67
   2  -6   6  314.38   24.99
   2  -6   5   25.22    5.25
  -2   6  -5    9.12    4.33
  -2   6  -5   19.50    2.88
   2  -6   5   14.20    6.08
   2  -6   4   11.70    3.14
  -2   6  -4   24.17    7.62
  -2   6  -4   15.31    3.03
   2  -6   4   20.51    7.72
   2  -6   3  519.34   17.81
  -2   6  -3  442.05   33.41
  -2   6  -3  445.02   32.63
   2  -6   3  463.68   33.87
   2  -6   3  503.84   17.34
   2  -6   2  408.70   32.62
  -2   6  -2  451.09   34.78
  -2   6  -2  463.28   33.79
   2  -6   2  396.23   28.97
   2  -6   2  419.97   31.39
   2  -6   1  412.91   30.98
  -2   6  -1  504.11   19.11
  -2   6  -1  519.13   16.23
   2  -6   1  402.57   29.36
   2  -6   1  418.89   31.12
   2  -6   0 2845.68  262.42
  -2   6   0 2615.17   90.68
  -2   6   0 2695.31   91.28
   2  -6   0 2643.92   89.52
   2  -6   0 2748.24  252.95
   2  -6  -1 1221.93   43.57
  -2   6   1 1188.45   43.25
  -2   6   1 1189.24   40.40
   2  -6  -1 1155.31   39.25
   2  -6  -1 1211.55   42.47
  -2   6   2  877.54   37.19
  -2   6   2  732.55   28.18
   2  -6  -2  845.55   33.92
   2  -6  -3   56.99    8.44
  -2   6   3   55.67    9.12
  -2   6   3   39.63    4.02
  -2   6   3   47.21    4.86
   2  -6  -3   43.10    6.15
   2  -6  -4   20.89    5.53
  -2   6   4   18.16    6.64
  -2   6   4   11.03    2.06
  -2   6   4    9.55    2.12
   2  -6  -4   21.83    5.35
   2  -6  -5  154.94   11.35
  -2   6   5  150.34   12.88
  -2   6   5  128.30   13.21
   2  -6  -5  176.28   10.58
   2  -6  -6   91.08   11.94
  -2   6   6  135.66   10.67
   2  -6  -6   56.98   11.48
  -2   6   7   42.43   10.95
  -2   6   7   30.00    9.21
   2  -6  -7   21.50    6.04
  -2   6   8   17.63    7.18
  -2   6   8   14.40    5.16
  -2   7 -12   22.96    5.82
  -2   7 -12   28.15    7.37
   2  -7  12   -1.18    6.40
  -2   7 -11   88.83    8.31
  -2   7 -11   82.27   13.45
   2  -7  11   84.27   11.60
  -2   7 -10   86.97    7.32
  -2   7 -10   78.36   12.79
   2  -7  10  137.62   13.70
   2  -7   9   38.29    9.70
  -2   7  -9   67.67   10.84
  -2   7  -9   74.96   14.93
   2  -7   9   52.99   11.53
   2  -7   8  108.39   16.14
  -2   7  -8   65.98    8.29
  -2   7  -8   77.91   11.51
   2  -7   8  125.12   14.61
   2  -7   7   72.59   18.10
  -2   7  -7   22.40    6.38
  -2   7  -7    9.82    6.21
   2  -7   7   61.71   14.80
   2  -7   6  122.03   15.74
  -2   7  -6   72.76   10.51
  -2   7  -6   79.04   13.91
   2  -7   6  112.32   14.02
   2  -7   5  529.55   22.35
  -2   7  -5  446.14   20.23
  -2   7  -5  470.85   21.31
   2  -7   5  514.03   23.80
   2  -7   4  274.96   33.42
  -2   7  -4  216.68   18.42
  -2   7  -4  242.01   22.57
   2  -7   4  257.50   20.64
   2  -7   3    6.02    4.14
  -2   7  -3    9.72    3.35
   2  -7   3    4.95    2.18
   2  -7   3   11.02    6.27
   2  -7   2  130.60   22.45
  -2   7  -2  129.30   15.99
  -2   7  -2  148.28   15.03
   2  -7   2  139.29   11.10
   2  -7   2  127.63   14.08
   2  -7   1  756.52   31.92
  -2   7  -1  745.18   32.35
  -2   7  -1  743.36   29.47
   2  -7   1  703.53   27.85
   2  -7   1  785.49   32.41
   2  -7   0  479.16   20.33
  -2   7   0  378.00   17.51
  -2   7   0  356.03   13.60
   2  -7   0  418.23   15.78
   2  -7   0  438.63   18.01
   2  -7  -1  110.72   20.79
  -2   7   1  298.27   18.03
  -2   7   1  272.75   10.43
   2  -7  -2   15.25    3.89
  -2   7   2   12.21    6.78
  -2   7   2   -0.19    0.69
  -2   7   2    3.75    1.28
   2  -7  -2   18.94    4.41
   2  -7  -3   22.45    5.96
  -2   7   3   45.92   11.89
   2  -7  -3   16.90    4.75
   2  -7  -4   11.18    4.97
  -2   7   4    5.20    6.28
   2  -7  -4    3.34    1.79
   2  -7  -5   44.60    9.48
  -2   7   5   62.21   12.75
   2  -7  -6   15.69    4.87
  -2   7   6   11.24    6.15
  -2   7   7   11.05    7.42
  -2   8 -12   55.88   12.36
   2  -8  12   80.85   12.94
  -2   8 -11  133.27   11.25
  -2   8 -11  127.18   25.55
   2  -8  11  188.53   16.71
  -2   8 -10   89.80    9.89
  -2   8 -10   77.93    9.01
   2  -8  10   64.71   13.47
   2  -8   9  106.34   12.66
  -2   8  -9   97.60   13.21
  -2   8  -9   92.56   16.25
   2  -8   8  140.11   14.94
  -2   8  -8  118.24   14.56
  -2   8  -8  131.81   19.67
   2  -8   8  116.03   14.48
   2  -8   7  232.53   15.68
  -2   8  -7  281.69   19.15
  -2   8  -7  305.79   29.74
   2  -8   7  271.56   19.33
   2  -8   6  962.58   33.18
  -2   8  -6  974.87   34.84
  -2   8  -6  997.51   34.83
   2  -8   6  989.92   36.33
   2  -8   5  879.98   44.25
  -2   8  -5  791.91   40.88
  -2   8  -5  831.09   42.02
   2  -8   5  870.60   44.41
   2  -8   4  662.92   35.28
  -2   8  -4  787.42   41.00
  -2   8  -4  730.88   39.46
   2  -8   4  603.82   31.05
   2  -8   3  601.59   31.32
  -2   8  -3  459.57   23.72
   2  -8   3  537.65   27.87
   2  -8   2  155.42   30.91
  -2   8  -2  203.72   28.98
  -2   8  -2  185.12   25.48
   2  -8   2  131.21   18.20
   2  -8   2  135.61   19.44
   2  -8   1   27.82    8.79
  -2   8  -1   23.23    8.56
  -2   8  -1   31.53    7.16
   2  -8   1   21.89    5.11
   2  -8   1   30.42    7.54
   2  -8   0  107.22   15.87
  -2   8   0   80.25   14.84
  -2   8   0   98.87   10.36
   2  -8   0   80.70   12.55
   2  -8  -1  180.99   40.70
  -2   8   1  200.73   15.89
  -2   8   1  165.51   13.60
   2  -8  -1  195.36   13.65
   2  -8  -2  361.10   21.60
  -2   8   2  398.22   24.04
   2  -8  -2  358.41   19.50
   2  -8  -3   67.33   16.01
  -2   8   3   72.33   12.18
   2  -8  -3   53.41   14.26
   2  -8  -4   79.07   12.29
  -2   8   4   79.56    9.78
   2  -8  -4   50.20   11.83
   2  -8  -5   56.39    9.39
  -2   8   5   13.24    8.25
   2  -8  -6   12.59    6.39
  -2   8   6    4.56    5.19
  -2   9 -11   11.64    5.04
  -2   9 -11    4.34    2.21
  -2   9 -10  187.76   14.82
  -2   9 -10  164.80   24.23
   2  -9  10  237.15   19.38
   2  -9   9   66.17   18.88
  -2   9  -9   78.76    7.51
  -2   9  -9   97.40   16.10
   2  -9   9   76.96   10.27
   2  -9   8   95.35   14.38
  -2   9  -8   80.55   11.67
  -2   9  -8  102.08   18.19
   2  -9   8  115.84   22.49
   2  -9   7   11.25    3.30
  -2   9  -7    3.20    4.66
  -2   9  -7   12.90    4.53
   2  -9   7   23.30    8.27
   2  -9   6  119.60   16.27
  -2   9  -6   93.40   11.85
  -2   9  -6  110.48   16.67
   2  -9   6   94.14   11.53
   2  -9   5  114.77   16.07
  -2   9  -5  152.63   17.09
  -2   9  -5  131.79   21.50
   2  -9   5  116.61   13.20
   2  -9   4  397.85   35.92
  -2   9  -4  340.89   23.14
  -2   9  -4  307.17   27.15
   2  -9   4  338.18   22.20
   2  -9   3  187.36   29.14
  -2   9  -3  200.52   14.38
   2  -9   3  167.79   15.40
   2  -9   2  399.42   25.97
  -2   9  -2  394.50   26.71
  -2   9  -2  391.83   23.99
   2  -9   2  401.36   25.87
   2  -9   1   97.76   15.87
  -2   9  -1   66.49   10.98
  -2   9  -1   55.57   10.71
   2  -9   1   97.97   11.79
   2  -9   0  119.98   21.82
  -2   9   0  137.47   15.08
   2  -9   0  114.86   19.32
   2  -9  -1   51.40    8.23
  -2   9   1   39.19    9.37
   2  -9  -1   58.85    8.07
   2  -9  -2   57.10   13.16
  -2   9   2   72.37   11.44
   2  -9  -2   63.10    8.96
   2  -9  -3   44.94   12.68
  -2   9   3   29.58   10.29
   2  -9  -4   47.97   15.75
  -2   9   4   68.07   11.14
  -2  10 -10  223.00   22.08
  -2  10 -10  189.59   31.15
   2 -10  10  268.63   27.93
   2 -10   9   93.89   21.54
  -2  10  -9  130.67   12.21
  -2  10  -9  123.29   23.45
   2 -10   9  147.61   14.36
   2 -10   8  294.79   21.24
  -2  10  -8  322.98   22.46
  -2  10  -8  308.96   31.43
   2 -10   8  341.51   23.85
   2 -10   7  162.39   20.97
  -2  10  -7  170.47   13.56
  -2  10  -7  166.41   21.66
   2 -10   7  186.57   14.93
   2 -10   6  134.22   15.76
  -2  10  -6  133.16    9.18
  -2  10  -6  116.92   26.61
   2 -10   6  160.49    9.65
   2 -10   5   17.09    5.17
  -2  10  -5    7.28    6.03
  -2  10  -5    8.26    3.28
   2 -10   5   10.40    4.78
   2 -10   4   78.53   13.03
  -2  10  -4   46.08    8.65
  -2  10  -4   51.87   12.06
   2 -10   4   70.23   10.07
   2 -10   3  360.63   32.85
  -2  10  -3  361.27   17.44
  -2  10  -3  306.20   15.54
   2 -10   3  333.46   14.32
   2 -10   2  208.89   21.32
  -2  10  -2  195.56   15.00
   2 -10   2  184.36    9.18
   2 -10   1  230.16   20.46
  -2  10  -1  257.22   20.05
   2 -10   1  243.15   15.25
   2 -10   0   86.11   16.28
  -2  10   0  127.83   12.76
   2 -10   0   92.90    7.65
   2 -10  -1   21.96    7.47
  -2  10   1   20.50    8.58
   2 -10  -2   11.38    3.47
  -2  10   2   20.05    8.66
   2 -10  -3   21.36    9.72
  -2  10   3   13.21    9.58
   2 -11   9   50.37   18.89
  -2  11  -9   47.61   10.68
  -2  11  -9   46.45   11.27
   2 -11   9   78.51   10.33
   2 -11   8  185.26   26.40
  -2  11  -8  229.92   23.46
  -2  11  -8  226.60   27.01
   2 -11   8  192.31   20.61
   2 -11   7  282.78   32.67
  -2  11  -7  298.25   21.87
  -2  11  -7  265.87   28.43
   2 -11   7  306.56   21.64
   2 -11   6  304.88   32.44
  -2  11  -6  294.99   22.20
   2 -11   6  273.11   19.52
   2 -11   5  192.97   24.37
  -2  11  -5  187.43   15.36
  -2  11  -5  143.47   16.37
   2 -11   5  194.59   15.21
   2 -11   4   96.01   13.47
  -2  11  -4   91.51   13.26
  -2  11  -4   63.79   12.30
   2 -11   4   88.28    7.91
   2 -11   3    6.32    4.11
  -2  11  -3    4.02    6.18
   2 -11   3   11.90    4.78
   2 -11   2   14.87    4.93
  -2  11  -2    9.10    6.81
   2 -11   2   25.66    7.74
   2 -11   1  111.14   25.93
  -2  11  -1  111.56   15.63
   2 -11   0  121.60   24.65
  -2  11   0  127.68   12.03
   2 -12   7   20.44    8.30
  -2  12  -7   31.66   12.01
  -2  12  -7   25.97    9.33
   2 -12   7   20.61    7.36
   2 -12   6  105.81   21.77
  -2  12  -6  148.63   13.51
   2 -12   6  144.72   11.35
   2 -12   5  269.86   27.60
  -2  12  -5  304.89   22.88
   2 -12   5  260.10   16.04
   2 -12   4   73.53   12.55
  -2  12  -4   75.10   12.00
   2 -12   4   77.00    7.67
   2 -12   3   42.88   14.53
  -2  12  -3   91.57   13.31
   2 -12   3   39.09    5.60
  -3 -11   3   56.56   11.28
   3  11  -3   34.16   10.65
   3  11  -3   15.17    7.54
  -3 -11   4   17.32    7.73
   3  11  -4   18.08    7.54
   3  11  -4    5.03    4.72
  -3 -11   5   39.47    9.48
   3  11  -5   28.18    9.31
   3  11  -5   43.41    9.82
  -3 -11   6   49.44   11.43
   3  11  -6   76.22   11.89
   3  11  -6   68.65   10.14
  -3 -11   7   59.71   11.20
   3  11  -7   26.91    7.95
   3  11  -7   28.26    7.34
  -3 -11   8    9.51    5.66
   3  11  -8    5.38    5.11
   3  11  -8   10.22    5.28
  -3 -11   8   13.59    5.45
  -3 -11   9   13.24    6.48
   3  11  -9    6.36    3.86
   3  11  -9    3.52    4.65
  -3 -11   9    3.75    3.97
  -3 -11  10   13.50    6.22
   3  11 -10   -5.04    2.94
   3  11 -10    1.97    4.54
  -3 -11  10   12.73    5.28
  -3 -10   0   30.16   10.88
   3  10   0   37.04   11.83
   3  10   0   40.26    9.12
  -3 -10   1    6.36    3.40
   3  10  -1    9.03    4.95
  -3 -10   2   30.74    9.38
   3  10  -2   38.75    9.45
   3  10  -2   52.97    8.98
  -3 -10   3   11.77    5.46
   3  10  -3   -7.76    5.65
   3  10  -3   17.49    7.65
  -3 -10   4   26.94    7.10
   3  10  -4   39.53    9.03
   3  10  -4   36.57    7.99
  -3 -10   5   26.00    6.65
   3  10  -5   32.53    8.04
   3  10  -5   35.27    7.58
  -3 -10   6  141.31   13.06
   3  10  -6  153.64   14.60
   3  10  -6  138.46   11.33
  -3 -10   6  130.47    9.32
  -3 -10   7  138.59   11.67
   3  10  -7  139.79   13.77
   3  10  -7  139.20   13.41
  -3 -10   7  131.67   10.66
  -3 -10   8   75.46    8.10
   3  10  -8   75.68    9.38
   3  10  -8   80.80    8.55
  -3 -10   8   94.98    9.67
  -3 -10   9   25.24    7.49
   3  10  -9   33.66    8.52
   3  10  -9   25.73    7.78
  -3 -10   9   35.79    9.12
  -3 -10  10   46.34    8.14
   3  10 -10   54.52    7.63
   3  10 -10   41.89    8.99
  -3 -10  10   42.37    7.35
  -3 -10  11   51.86   10.15
   3  10 -11   41.48    9.52
  -3 -10  11   58.86    8.70
  -3 -10  12   12.15    5.62
   3  10 -12    9.15    5.71
  -3 -10  12    3.79    5.89
  -3  -9  -1    9.43    3.26
   3   9   1   10.09    7.48
   3   9   1    8.41    5.26
  -3  -9   0   21.23    7.25
   3   9   0   20.07    7.91
   3   9   0   22.91    9.37
  -3  -9   1  261.55   19.01
   3   9  -1  249.64   18.32
  -3  -9   2  139.75   11.47
   3   9  -2  150.16   13.72
   3   9  -2  146.57   12.19
  -3  -9   3  176.39   11.89
   3   9  -3  131.10   10.87
   3   9  -3  138.37   10.78
  -3  -9   4   47.57    9.71
   3   9  -4   63.82   11.76
   3   9  -4   57.47   10.40
  -3  -9   4   37.29    5.93
  -3  -9   5   34.02    9.35
   3   9  -5   40.31    8.74
   3   9  -5   45.92   10.24
  -3  -9   5   29.53    5.18
  -3  -9   6   26.14    8.96
   3   9  -6   13.47    5.89
   3   9  -6   16.38    5.71
  -3  -9   6   20.76    5.27
  -3  -9   7   15.72    5.90
   3   9  -7   22.42    6.26
   3   9  -7   28.53    7.78
  -3  -9   7   12.93    4.35
  -3  -9   8  226.30   16.70
   3   9  -8  234.31   15.46
   3   9  -8  228.97   16.67
  -3  -9   8  206.95   13.84
  -3  -9   9  262.70   13.17
   3   9  -9  262.07   11.98
   3   9  -9  261.19   14.86
  -3  -9   9  318.13   16.53
  -3  -9  10  188.97   13.94
   3   9 -10  205.48   14.06
   3   9 -10  230.65   16.55
  -3  -9  10  212.37   16.42
  -3  -9  11  449.35   30.93
   3   9 -11  430.68   29.69
  -3  -9  11  401.89   28.12
  -3  -9  12   22.83    8.91
   3   9 -12   18.56    7.40
  -3  -9  12    4.27    6.11
  -3  -9  13   28.53   10.22
   3   9 -13   11.67    6.01
  -3  -9  13   14.84    6.82
  -3  -8  -3    6.64    2.00
   3   8   3   17.28   10.60
   3   8   3   19.29    8.22
  -3  -8  -2   32.55    8.88
   3   8   2   29.64   10.01
   3   8   2   46.16   10.22
  -3  -8  -1   15.83    4.84
   3   8   1   25.73    9.20
   3   8   1    9.87    7.72
  -3  -8   0   22.56    7.11
   3   8   0    4.01    6.79
   3   8   0   45.05    9.12
  -3  -8   1   69.92   12.19
   3   8  -1   75.73   14.05
  -3  -8   2   32.12    8.72
   3   8  -2   30.57   11.18
   3   8  -2   36.62    9.46
  -3  -8   3  302.79   20.75
   3   8  -3  301.67   21.29
   3   8  -3  300.86   21.53
  -3  -8   3  267.94   16.30
  -3  -8   4  109.61   13.14
   3   8  -4  124.43   16.18
   3   8  -4  122.43   14.30
  -3  -8   4  108.17   11.61
  -3  -8   5   67.93   11.73
   3   8  -5  113.32   14.62
   3   8  -5   82.09   13.70
  -3  -8   5   65.81   10.35
  -3  -8   6  161.24   18.32
   3   8  -6  157.11   17.88
   3   8  -6  164.74   18.68
  -3  -8   6  155.89   16.80
  -3  -8   7   12.42    5.82
   3   8  -7   11.22    5.27
   3   8  -7   21.35    7.15
  -3  -8   7    8.77    6.43
  -3  -8   8   55.73   13.06
   3   8  -8   39.46    8.67
   3   8  -8   38.58    9.56
  -3  -8   8   44.44   10.56
  -3  -8   9   22.73    8.84
   3   8  -9   29.44    7.08
   3   8  -9   41.21   10.11
  -3  -8   9   21.16    7.13
  -3  -8  10  364.07   16.79
   3   8 -10  310.33   12.53
   3   8 -10  307.38   15.68
  -3  -8  10  312.76   15.21
  -3  -8  11   61.44   12.26
   3   8 -11   88.74    9.12
  -3  -8  11   60.23   13.58
  -3  -8  12   63.41    8.32
   3   8 -12   49.14    7.68
  -3  -8  12   64.36    9.60
  -3  -8  13   15.55    6.08
   3   8 -13    3.72    4.62
  -3  -8  13   13.33    6.99
  -3  -7  -4   34.35   12.44
   3   7   4   49.12   11.87
   3   7   4   42.10    9.92
  -3  -7  -3   53.76   12.95
   3   7   3   67.40    9.82
   3   7   3   53.86    8.89
  -3  -7  -2  106.01   21.41
   3   7   2  144.23   14.94
   3   7   2  111.81   14.72
  -3  -7  -1   78.18   13.05
   3   7   1  116.44   12.40
   3   7   1  104.56   16.60
  -3  -7   0   84.43   10.04
   3   7   0   92.87   11.75
   3   7   0   88.35   10.26
  -3  -7   1   76.78   12.58
   3   7  -1   71.34   12.25
   3   7  -1   86.14   14.61
  -3  -7   2   16.06    5.71
   3   7  -2   31.05   11.13
   3   7  -2   30.05   10.89
   3   7  -3   31.69   10.39
   3   7  -3    9.67    5.86
  -3  -7   3   24.97    4.75
  -3  -7   3   43.20    5.05
  -3  -7   4  669.85   27.13
   3   7  -4  769.79   31.05
   3   7  -4  722.98   29.46
  -3  -7   4  566.72   21.48
  -3  -7   4  725.39   27.58
  -3  -7   5  872.24   34.58
   3   7  -5  754.46   31.06
   3   7  -5  756.35   30.66
  -3  -7   5  758.84   29.31
  -3  -7   6 1407.33   54.04
   3   7  -6 1330.72   50.40
   3   7  -6 1351.88   51.94
  -3  -7   6 1319.45   49.64
  -3  -7   7  208.15   29.48
   3   7  -7  254.81   37.26
   3   7  -7  260.00   16.17
  -3  -7   7  195.00   27.81
  -3  -7   8  353.59   15.74
   3   7  -8  341.38   13.96
   3   7  -8  354.22   15.81
  -3  -7   8  359.11   16.58
  -3  -7   9   16.03    6.05
   3   7  -9    4.94    3.19
   3   7  -9    5.31    5.12
  -3  -7   9    6.94    5.45
  -3  -7  10   69.25    9.98
   3   7 -10   49.00    9.75
   3   7 -10   47.93   11.36
  -3  -7  10   77.24   12.37
  -3  -7  11   24.95    7.42
   3   7 -11   50.20    9.89
  -3  -7  11   34.08   10.81
  -3  -7  12  193.84   14.97
   3   7 -12  164.86   13.80
  -3  -7  12  156.19   14.05
  -3  -7  13  103.90   10.34
   3   7 -13  111.45   21.40
  -3  -7  13   98.31   11.61
   3   7 -14   87.15   18.27
  -3  -6  -5    8.92    4.21
   3   6   5   27.12   10.15
   3   6   5   30.82    9.46
  -3  -6  -4   25.32    8.62
   3   6   4   45.14    9.46
   3   6   4   43.92    9.47
  -3  -6  -3   15.08    4.55
   3   6   3   11.69    6.55
  -3  -6  -2   65.79   10.76
   3   6   2  104.88   13.37
  -3  -6  -1  119.93   13.72
   3   6   1  113.06   14.19
  -3  -6   0  282.56   16.16
   3   6   0  310.12   19.37
   3   6   0  308.61   19.22
  -3  -6   1  241.35   19.29
   3   6  -1  247.36   21.34
   3   6  -1  236.37   20.24
  -3  -6   2  377.97   29.03
   3   6  -2  288.95   23.38
   3   6  -2  351.95   27.26
  -3  -6   2  347.62   25.29
  -3  -6   2  352.40   25.64
  -3  -6   3  181.07   17.08
   3   6  -3  209.15   20.01
   3   6  -3  204.18   18.76
  -3  -6   3  161.97   14.43
  -3  -6   3  187.66   15.93
  -3  -6   4  103.61   11.04
   3   6  -4  130.92   14.04
   3   6  -4  131.55   12.72
  -3  -6   4   71.78   10.78
  -3  -6   4  113.72   10.46
  -3  -6   5  200.24   18.75
   3   6  -5  122.97   12.84
   3   6  -5  103.28   11.50
  -3  -6   5  160.28   14.56
  -3  -6   6  308.54   24.42
   3   6  -6  379.38   29.22
   3   6  -6  440.86   21.37
  -3  -6   6  289.56   22.61
  -3  -6   7  230.21   19.58
   3   6  -7  180.12   13.81
   3   6  -7  207.28   16.38
   3   6  -7  221.47   18.80
  -3  -6   7  206.60   17.58
  -3  -6   8  900.76   35.61
   3   6  -8  722.54   27.13
   3   6  -8  845.33   31.95
   3   6  -8  839.67   33.54
  -3  -6   8  886.63   35.78
  -3  -6   9  175.21   19.82
   3   6  -9  240.08   24.51
   3   6  -9  264.96    9.97
   3   6  -9  270.51   13.69
  -3  -6   9  192.63   22.28
  -3  -6  10  298.52   20.84
   3   6 -10  247.86   15.34
   3   6 -10  233.57   16.65
  -3  -6  10  341.50   24.08
  -3  -6  11  122.76   10.08
   3   6 -11  141.68   10.81
  -3  -6  11  102.19   17.02
  -3  -6  12   10.32    4.93
   3   6 -12    7.08    4.58
  -3  -6  12   19.07   10.80
  -3  -6  13   24.84    8.03
   3   6 -13    1.58    2.71
  -3  -6  13   28.99    9.79
   3   6 -14   20.27    9.32
  -3  -6  14    6.45    6.60
  -3  -5  -6    6.33    2.34
  -3  -5  -6   12.24    5.27
   3   5   6   14.23    7.33
  -3  -5  -5   16.56    5.68
  -3  -5  -5   36.60    7.99
   3   5   5   28.39    8.81
  -3  -5  -4   33.82    9.80
  -3  -5  -4   35.61    8.11
   3   5   4   47.61   11.23
  -3  -5  -3   80.06   12.84
  -3  -5  -3   98.34   10.71
   3   5   3   88.54   12.15
  -3  -5  -2   16.71    5.46
   3   5   2   18.67    8.09
  -3  -5  -1   58.42    8.61
  -3  -5  -1   51.81    7.62
   3   5   1   46.14    8.42
  -3  -5   0   59.65    8.21
  -3  -5   0   53.27    7.63
   3   5   0   86.98   12.08
  -3  -5   1   87.87    9.05
  -3  -5   1  116.84   11.65
   3   5  -1  140.66   13.64
  -3  -5   2  852.08   27.99
  -3  -5   2  793.98   26.19
   3   5  -2  768.58   25.76
  -3  -5   2  750.17   22.45
  -3  -5   2  812.53   24.44
  -3  -5   3  522.55   19.61
   3   5  -3  535.87   18.74
   3   5  -3  550.96   20.13
  -3  -5   3  490.80   40.07
  -3  -5   3  501.38   15.91
  -3  -5   4  588.01   20.74
   3   5  -4  557.29   19.16
   3   5  -4  559.13   20.02
  -3  -5   4  547.86   17.69
  -3  -5   4  609.54   20.16
  -3  -5   5  195.82   15.68
   3   5  -5  219.12   16.68
   3   5  -5  252.35   19.92
   3   5  -5  230.17   18.92
  -3  -5   5  161.78   16.55
  -3  -5   5  202.44   16.19
  -3  -5   6   30.68    7.05
   3   5  -6   21.59    3.36
   3   5  -6   39.53    6.18
   3   5  -6   29.33    5.64
  -3  -5   6   17.16    5.88
  -3  -5   7  198.47   18.63
   3   5  -7  128.38   11.80
   3   5  -7  132.25   11.81
   3   5  -7  154.42   14.46
  -3  -5   7  196.11   18.17
  -3  -5   8  162.40   14.87
   3   5  -8  170.41   14.34
   3   5  -8  189.56   14.49
   3   5  -8  195.96   15.88
  -3  -5   8  138.58   13.37
  -3  -5   9   62.14   14.82
   3   5  -9   17.99    4.77
   3   5  -9   24.99    5.58
   3   5  -9   31.43    8.33
  -3  -5   9   53.23   13.19
  -3  -5  10  160.66   18.20
   3   5 -10  183.10   20.03
  -3  -5  10  167.41   20.95
  -3  -5  11  104.25   13.08
   3   5 -11   92.70   11.65
  -3  -5  11  106.50   14.10
  -3  -5  12   31.65    6.45
   3   5 -12   19.35    5.51
  -3  -5  12   52.05   13.11
  -3  -5  13   36.87    9.54
   3   5 -13   33.93   10.34
  -3  -5  13   30.73    8.70
   3   5 -14    3.59    2.85
  -3  -5  14   20.86   11.52
  -3  -4  -7   10.03    5.51
   3   4   7   16.96    7.45
  -3  -4  -6   16.27    4.64
  -3  -4  -6   24.79    5.53
   3   4   6   27.98    9.83
  -3  -4  -5   15.97    4.99
  -3  -4  -5   21.76    5.93
   3   4   5   40.36   10.08
  -3  -4  -4   39.45   10.73
  -3  -4  -4   63.90   14.16
   3   4   4   58.16   13.35
  -3  -4  -3  156.95   29.32
  -3  -4  -3  146.71   21.30
   3   4   3  166.24   26.36
  -3  -4  -2  121.98   13.30
  -3  -4  -2  116.86   12.56
   3   4   2  123.38   14.92
  -3  -4  -1   44.98    6.01
  -3  -4  -1   39.44    6.64
   3   4   1   41.73    7.17
  -3  -4   0  182.87   14.75
  -3  -4   0  209.13   17.11
   3   4   0  196.60   16.54
  -3  -4   1  773.51   22.12
  -3  -4   1  774.38   22.55
   3   4  -1  720.83   22.03
  -3  -4   1  730.40   18.84
  -3  -4   1  744.69   19.24
  -3  -4   2  684.11   20.34
  -3  -4   2  714.13   20.97
   3   4  -2  772.80   23.62
  -3  -4   2  660.61   17.57
  -3  -4   2  708.08   19.16
  -3  -4   3  309.91   18.87
  -3  -4   3  295.71   17.48
   3   4  -3  271.38   23.76
   3   4  -3  294.83   18.91
  -3  -4   3  272.64   16.89
  -3  -4   3  308.26   17.93
  -3  -4   4  443.18   26.45
   3   4  -4  334.76   27.09
   3   4  -4  341.23   20.09
   3   4  -4  385.24   23.53
  -3  -4   4  377.26   23.79
  -3  -4   4  401.12   23.47
  -3  -4   5  596.04   18.99
   3   4  -5  657.31   18.15
   3   4  -5  686.35   19.39
   3   4  -5  738.39   22.14
  -3  -4   5  524.93   29.99
  -3  -4   5  604.92   18.67
  -3  -4   6  494.42   41.60
   3   4  -6  367.54   27.47
   3   4  -6  401.54   29.39
   3   4  -6  377.01   28.80
  -3  -4   6  532.90   19.04
  -3  -4   7  162.82   14.91
   3   4  -7  141.65   11.81
   3   4  -7  151.76   11.48
  -3  -4   7  133.69   13.96
  -3  -4   8   71.48    8.62
   3   4  -8   59.99    6.62
   3   4  -8   69.89    6.68
   3   4  -8   85.19   11.00
  -3  -4   8   53.32    8.30
  -3  -4   9  217.65   11.35
   3   4  -9  178.82   18.78
  -3  -4  10  430.08   18.18
   3   4 -10  415.71   17.69
  -3  -4  10  434.82   20.51
  -3  -4  11   89.92   10.79
   3   4 -11   69.52   13.06
  -3  -4  11   96.01   13.29
  -3  -4  12   86.24    8.45
   3   4 -12   68.06   15.63
  -3  -4  12   79.26   10.12
  -3  -4  13   12.26    4.36
   3   4 -13   10.97    3.68
  -3  -4  13    0.10    5.31
   3   4 -14   25.26    9.22
  -3  -4  14   41.83   11.11
  -3  -3  -8   58.02   10.68
   3   3   8   82.78   10.91
  -3  -3  -7   36.44    7.06
   3   3   7   12.34    6.64
  -3  -3  -6   16.43    4.63
  -3  -3  -6   33.24    7.37
   3   3   6   19.51    6.97
   3   3   6   22.41    4.38
  -3  -3  -5   70.87   12.95
  -3  -3  -5   72.61    9.02
   3   3   5   94.40   11.98
   3   3   5   86.75    7.86
  -3  -3  -4  187.12   28.90
  -3  -3  -4  205.01   31.29
   3   3   4  143.91   22.12
   3   3   4  123.93   17.42
   3   3   4  131.22   18.11
  -3  -3  -3  197.16   15.19
  -3  -3  -3  250.05   33.15
   3   3   3  298.16   24.98
   3   3   3  274.31   20.22
   3   3   3  274.30   20.18
  -3  -3  -2  343.56   25.47
   3   3   2  299.54   11.85
  -3  -3  -2  342.12   29.79
   3   3   2  372.41   17.23
   3   3   2  308.49   10.86
   3   3   2  322.11   11.27
  -3  -3  -1  633.44   18.30
   3   3   1  636.31   18.04
  -3  -3  -1  630.75   27.21
   3   3   1  658.41   20.56
   3   3   1  618.89   15.88
   3   3   1  635.71   16.33
  -3  -3   0  637.28   18.43
   3   3   0  653.61   18.66
  -3  -3   0  634.87   19.03
   3   3   0  633.04   16.55
  -3  -3   0  623.04   16.18
  -3  -3   1  328.19   16.86
   3   3  -1  265.91   13.54
  -3  -3   1  292.80   18.84
   3   3  -1  265.72   13.50
   3   3  -1  298.08   16.73
   3   3  -1  287.71   14.04
  -3  -3   1  311.49   14.76
  -3  -3   2   82.56    7.41
   3   3  -2   71.55    5.48
  -3  -3   2   88.80    8.40
   3   3  -2   63.68    6.67
   3   3  -2   74.20    6.39
  -3  -3   2   70.95    5.55
   3   3  -2   76.99    6.51
  -3  -3   2   70.55    4.21
   3   3  -3    8.26    2.51
  -3  -3   3    7.48    2.18
   3   3  -3    8.91    1.85
   3   3  -3    9.53    4.52
  -3  -3   3    3.60    3.57
   3   3  -3   10.80    2.42
  -3  -3   3    4.46    1.35
  -3  -3   4  676.89   38.81
  -3  -3   4  708.45   14.65
   3   3  -4  716.66   18.88
   3   3  -4  698.77   16.15
   3   3  -4  728.69   15.89
  -3  -3   4  652.46   37.25
   3   3  -5  740.32   19.68
   3   3  -5  757.62   20.38
   3   3  -5  769.12   22.03
  -3  -3   5  629.61   18.12
  -3  -3   6 1282.42   35.83
   3   3  -6 1078.09   27.90
   3   3  -6 1135.05   29.44
   3   3  -6 1152.43   32.13
   3   3  -6 1125.74   31.57
  -3  -3   7  463.66   34.77
   3   3  -7  577.82   20.24
  -3  -3   8  287.48   13.92
   3   3  -8  255.01   22.41
  -3  -3   8  279.54   15.27
  -3  -3   9   62.98    9.89
   3   3  -9   72.28    9.26
  -3  -3   9   56.66    9.51
  -3  -3  10  185.10   20.59
   3   3 -10  177.73   19.62
  -3  -3  10  201.40   22.94
  -3  -3  11   67.13    9.37
   3   3 -11   60.26   11.38
  -3  -3  11   51.97   12.90
  -3  -3  12   69.57   13.49
   3   3 -12   51.58   15.65
  -3  -3  12   86.83   10.02
  -3  -3  13    3.97    3.66
   3   3 -13   14.26    5.76
  -3  -3  13   15.79    8.19
   3   3 -14    7.95    4.80
  -3  -3  14   29.81   12.00
  -3  -2  -9   -2.10    3.13
   3   2   9   25.53   10.49
  -3  -2  -8   24.16    7.90
   3   2   8   31.27   10.77
  -3  -2  -7   66.19   12.94
   3   2   7  105.93   15.54
   3   2   7   89.24   11.30
  -3  -2  -6    8.26    2.41
  -3  -2  -6    9.34    2.71
   3   2   6   12.17    6.93
   3   2   6    2.13    2.17
  -3  -2  -5  192.40   26.26
   3   2   5  232.00   31.58
  -3  -2  -5  211.56   39.00
   3   2   5  265.04   17.92
   3   2   5  211.05   28.78
   3   2   5  251.79   36.56
  -3  -2  -4  305.13   22.84
   3   2   4  311.75   23.30
  -3  -2  -4  329.28   25.73
   3   2   4  325.72   27.05
   3   2   4  296.40   21.93
   3   2   4  320.80   23.96
  -3  -2  -3  109.52    9.81
   3   2   3  116.46   10.23
  -3  -2  -3  108.89   19.41
   3   2   3  114.05   13.18
   3   2   3  111.79    9.86
  -3  -2  -3   88.86    7.96
  -3  -2  -2  371.36   21.34
   3   2   2  354.05   20.42
  -3  -2  -2  361.81   23.87
   3   2   2  373.35   23.60
   3   2   2  350.07   19.92
  -3  -2  -2  367.37   20.82
  -3  -2  -1   92.27    7.24
   3   2   1  163.04   10.30
  -3  -2  -1   77.76    8.72
   3   2   1  182.45   12.39
  -3  -2  -1   81.79    5.28
   3   2   0 1263.91   25.06
   3   2   0 1439.19   29.66
   3   2   0 1403.66   26.44
  -3  -2   0 1380.93   25.88
  -3  -2   1 2896.37   54.55
   3   2  -1 2500.75   47.40
  -3  -2   1 2861.37   54.18
   3   2  -1 2524.47   47.80
  -3  -2   1 2485.72   47.15
   3   2  -1 2719.88   50.33
  -3  -2   1 2828.70   52.14
  -3  -2   2 1183.98   17.27
   3   2  -2 1077.63   15.73
  -3  -2   2 1209.30   17.05
   3   2  -2 1071.71   14.94
  -3  -2   2 1134.52   16.33
   3   2  -2 1098.36   15.54
  -3  -2   2 1173.15   15.40
   3   2  -3  260.27    9.10
  -3  -2   3  220.48    7.85
   3   2  -3  283.09    8.94
  -3  -2   3  214.44    8.03
   3   2  -3  268.45   10.06
  -3  -2   3  208.50    7.25
  -3  -2   4 2153.72   42.11
  -3  -2   4 2118.47   39.35
   3   2  -4 2169.86   40.30
  -3  -2   4 2129.62   41.11
   3   2  -4 2209.53   42.33
  -3  -2   4 1994.82   39.18
  -3  -2   5  801.93   18.38
   3   2  -5  570.85   27.77
   3   2  -5  574.67   26.68
   3   2  -5  593.33   27.59
   3   2  -5  594.76   28.72
  -3  -2   5  754.59   16.84
   3   2  -5  577.27   29.86
  -3  -2   6  383.46   23.82
   3   2  -6  482.74   27.83
   3   2  -6  544.57   31.94
  -3  -2   7  230.88   19.41
   3   2  -7  148.64   11.97
   3   2  -7  178.06   15.64
  -3  -2   8  503.71   20.71
   3   2  -8  426.45   17.29
   3   2  -8  464.56   19.83
  -3  -2   9  591.18   25.08
   3   2  -9  654.71   26.33
  -3  -2   9  610.23   27.09
  -3  -2  10  604.85   22.97
   3   2 -10  586.02   23.20
  -3  -2  10  629.82   26.34
  -3  -2  11   27.94    6.38
   3   2 -11   26.35    6.35
  -3  -2  11   42.39   10.43
  -3  -2  12    4.22    4.36
   3   2 -12   15.12    4.91
  -3  -2  12   15.96    6.48
  -3  -2  13   32.66    7.07
   3   2 -13   31.71    9.14
  -3  -2  13   31.46    9.88
  -3  -1  -9   32.70    6.58
   3   1   9   33.91    9.46
   3   1   9   31.72    6.28
  -3  -1  -8   26.18    9.12
   3   1   8   42.12   12.05
   3   1   8   39.14    9.28
  -3  -1  -7   61.58   15.86
   3   1   7  111.31   16.05
   3   1   7   98.76   11.87
  -3  -1  -6  126.03   13.00
   3   1   6  109.99   11.43
  -3  -1  -6  133.73   23.05
   3   1   6  142.75   17.99
   3   1   6  123.36   14.36
  -3  -1  -5  676.45   25.08
   3   1   5  717.39   26.61
  -3  -1  -5  722.88   28.80
   3   1   5  762.48   32.29
   3   1   5  759.43   29.37
  -3  -1  -4  985.58   33.98
   3   1   4  832.51   28.95
  -3  -1  -4 1055.08   38.36
   3   1   4  850.78   31.95
   3   1   4  886.53   31.48
  -3  -1  -4  964.07   33.75
  -3  -1  -3  473.81   26.75
   3   1   3  456.69   25.86
  -3  -1  -3  479.28   28.14
   3   1   3  468.05   28.49
   3   1   3  458.66   26.19
  -3  -1  -3  434.37   24.88
  -3  -1  -2  367.86   20.94
   3   1   2  368.13   20.98
  -3  -1  -2  379.61   22.47
   3   1   2  392.95   24.37
   3   1   2  386.44   22.23
  -3  -1  -2  370.96   21.17
  -3  -1  -1  123.93    7.17
   3   1   1  128.17    7.33
  -3  -1  -1  130.98    9.77
   3   1   1  147.78    8.72
   3   1   1  133.39    8.67
  -3  -1  -1  121.78    7.30
   3   1   1  126.00    6.70
  -3  -1  -1  127.37    7.00
  -3  -1   0 1169.37   16.23
   3   1   0 1046.76   14.57
  -3  -1   0 1182.18   17.47
  -3  -1   0 1185.66   16.88
   3   1   0 1125.72   15.11
  -3  -1   0 1145.76   14.97
  -3  -1   1  397.13   12.66
  -3  -1   1  412.53   13.23
  -3  -1   1  414.67   12.68
  -3  -1   1  430.40   12.55
   3   1  -2  350.51   11.24
  -3  -1   2  461.18   13.74
   3   1  -2  386.79   11.71
   3   1  -2  376.13   12.11
  -3  -1   2  455.24   14.05
  -3  -1   2  461.29   13.59
  -3  -1   3  910.05   27.13
   3   1  -3  924.03   43.46
  -3  -1   3  901.38   24.93
   3   1  -3  941.82   43.78
   3   1  -3  987.22   14.76
   3   1  -3  977.17   16.05
  -3  -1   4  561.04   27.87
  -3  -1   4  538.34   25.42
   3   1  -4  465.42   21.74
   3   1  -4  490.47   23.62
  -3  -1   4  530.49   25.59
   3   1  -4  471.53   23.57
  -3  -1   4  522.60   25.06
  -3  -1   5 1047.81   22.72
   3   1  -5  837.60   18.05
   3   1  -5 1007.60   20.81
  -3  -1   5  947.89   19.54
   3   1  -5  946.64   27.72
  -3  -1   6  693.62   21.09
   3   1  -6  767.40   21.62
  -3  -1   6  689.73   19.59
   3   1  -6  762.01   22.35
  -3  -1   7  219.48   18.15
   3   1  -7  158.10   12.96
   3   1  -7  157.56   13.26
  -3  -1   8  296.50   24.18
   3   1  -8  276.38   21.23
   3   1  -8  280.70   22.65
  -3  -1   9  281.13   17.48
   3   1  -9  291.05   16.61
  -3  -1  10  106.99   11.57
   3   1 -10   62.97   16.46
  -3  -1  10  128.76   15.03
  -3  -1  11    9.46    5.34
   3   1 -11    7.26    3.84
  -3  -1  11    2.73    5.88
  -3  -1  12    6.98    4.46
   3   1 -12    3.31    1.46
  -3  -1  12   14.82    5.60
   3   1 -13    3.90    2.23
  -3  -1  13   11.67    8.50
  -3   0 -10   13.11    4.57
   3   0  10   42.79   11.20
   3   0  10   29.90    8.21
  -3   0  -9   33.00    7.90
   3   0   9   36.73   10.15
   3   0   9   14.28    4.82
  -3   0  -8   18.49    5.43
   3   0   8   17.17    8.15
   3   0   8   17.86    6.46
  -3   0  -7   35.13    9.62
   3   0   7   28.99    8.90
   3   0   7   38.43    9.33
  -3   0  -6   59.23   11.99
   3   0   6   52.56   10.99
   3   0   6   49.37    7.62
   3   0   5  194.88   14.20
  -3   0  -5  258.00   28.38
   3   0   5  204.04   17.22
   3   0   5  200.68   16.71
  -3   0  -4  662.95   19.82
   3   0   4  596.51   17.96
  -3   0  -4  697.64   23.26
   3   0   4  630.21   21.77
   3   0   4  631.80   21.05
  -3   0  -4  648.37   20.54
  -3   0  -3  637.24   16.85
   3   0   3  773.59   20.48
  -3   0  -3  664.55   19.85
   3   0   3  804.45   24.63
   3   0   3  809.19   22.45
  -3   0  -3  591.97   16.61
  -3   0  -2  313.56   15.02
   3   0   2  310.47   15.07
  -3   0  -2  318.24   16.24
   3   0   2  282.76   14.28
   3   0   2  288.00   14.45
  -3   0  -2  307.04   15.15
  -3   0  -1  993.05   13.67
  -3   0  -1 1061.76   16.59
  -3   0  -1  989.48   15.13
   3   0   1 1039.67   14.48
  -3   0  -1  990.16   13.75
  -3   0   0  488.23   14.56
   3   0   0  466.44   13.97
  -3   0   0  509.16   15.46
   3   0   0  478.79   14.47
   3   0   0  469.75   14.45
  -3   0   0  478.07   14.29
  -3   0   0  457.87   13.37
  -3   0   1  350.66   11.57
   3   0  -1  283.84    9.00
   3   0  -1  267.61    9.66
   3   0  -1  283.88    9.66
  -3   0   1  310.47    9.65
   3   0  -2 1972.00   25.38
  -3   0   2 2018.87   25.13
   3   0  -2 2025.59   24.88
   3   0  -2 2095.47   26.35
  -3   0   2 1950.24   24.42
   3   0  -2 2099.51   26.86
  -3   0   2 1926.51   24.41
  -3   0   3  323.98   12.82
   3   0  -3  358.64   11.75
  -3   0   3  382.90   11.18
   3   0  -3  394.55   11.40
   3   0  -3  410.10   12.74
  -3   0   3  387.04   11.94
   3   0  -3  397.82   16.92
  -3   0   3  362.09   11.57
  -3   0   4 6132.58  339.55
   3   0  -4 5525.80  102.09
  -3   0   4 5940.35  328.25
   3   0  -4 6079.58  336.21
  -3   0   4 5945.79  328.84
   3   0  -4 5838.26  323.19
  -3   0   5  503.50   25.52
  -3   0   5  541.92   25.27
   3   0  -5  543.84   25.28
   3   0  -5  554.77   26.48
  -3   0   5  526.34   25.14
   3   0  -5  553.43   27.39
  -3   0   6  434.45   26.81
  -3   0   6  427.24   24.02
  -3   0   6  422.15   23.56
   3   0  -6  382.14   22.34
  -3   0   6  408.58   23.67
  -3   0   7  237.03   22.18
  -3   0   7  241.21   19.68
  -3   0   7  225.71   18.48
   3   0  -7  239.31   20.24
   3   0  -7  233.63   20.38
  -3   0   8  199.82   17.13
  -3   0   8  187.10   13.77
  -3   0   8  177.54   13.16
   3   0  -8  224.72   25.22
   3   0  -8  216.16   18.13
  -3   0   9   80.89   18.99
  -3   0   9   70.56   14.95
  -3   0   9   70.64   15.01
   3   0  -9   55.66   15.24
   3   0  -9   48.89   13.00
  -3   0  10   43.74    9.93
   3   0 -10   32.20    7.91
  -3   0  10   41.33    9.75
  -3   0  11   80.04    8.70
   3   0 -11   58.04   15.99
  -3   0  11   75.24    8.60
  -3   0  12    8.02    4.79
   3   0 -12   21.02    7.24
  -3   0  12   20.32    9.17
   3   0 -13   39.12   11.30
  -3   0  13   82.28   13.20
  -3   1 -10   33.61    8.11
   3  -1  10   36.55    9.90
   3  -1  10   36.12    8.17
  -3   1  -9   38.54   11.00
   3  -1   9   64.88   13.70
   3  -1   9   77.75    9.68
  -3   1  -8   27.16    7.46
   3  -1   8   75.82   13.97
   3  -1   8   66.77    9.78
  -3   1  -7   37.41    9.27
   3  -1   7   30.69    8.36
   3  -1   7   50.36    9.66
  -3   1  -6    4.87    5.19
   3  -1   6    3.10    6.95
   3  -1   6   18.16    7.02
  -3   1  -5   80.20    8.21
   3  -1   5   95.14   11.34
   3  -1   5   93.52    9.73
  -3   1  -4   72.18    6.24
   3  -1   4   71.86    9.17
   3  -1   4   54.01    6.11
  -3   1  -4   58.01    5.20
  -3   1  -3  717.69   18.62
  -3   1  -3  696.89   18.10
  -3   1  -3  710.19   20.75
   3  -1   3  866.42   24.77
   3  -1   3  908.20   25.20
  -3   1  -3  703.38   19.96
  -3   1  -2 1025.53   19.62
   3  -1   2  930.45   17.96
  -3   1  -2 1056.22   22.27
   3  -1   2  917.10   19.27
   3  -1   2  899.66   18.71
   3  -1   2  923.37   19.91
   3  -1   2  924.35   19.37
  -3   1  -2 1036.25   20.95
  -3   1  -1  894.40   24.75
  -3   1  -1  912.96   26.07
   3  -1   1  849.96   23.81
   3  -1   1  798.56   22.70
  -3   1  -1  853.31   23.94
  -3   1   0 1178.66   16.34
   3  -1   0 1308.24   17.35
  -3   1   0 1233.93   17.60
   3  -1   0 1338.54   18.13
   3  -1   0 1357.79   18.61
   3  -1   0 1388.47   18.78
   3  -1  -1  327.54   10.55
  -3   1   1  420.81   12.70
   3  -1  -1  326.40   10.08
   3  -1  -1  329.44   10.45
  -3   1   1  401.45   11.82
   3  -1  -1  340.06   11.50
  -3   1   2   69.10    5.28
   3  -1  -2   71.26    5.29
  -3   1   2   74.74    4.59
   3  -1  -2   63.01    3.55
   3  -1  -2   67.66    3.62
  -3   1   2   64.42    3.71
   3  -1  -2   65.83    4.01
  -3   1   2   68.51    3.64
  -3   1   3 1841.52   25.18
  -3   1   3 1836.45   23.24
   3  -1  -3 1869.01   23.19
   3  -1  -3 1951.27   23.81
  -3   1   3 1825.29   22.45
  -3   1   3 1830.42   24.03
  -3   1   4   72.91    7.32
  -3   1   5  207.42   13.53
  -3   1   5  220.96   12.95
   3  -1  -5  226.29   13.17
   3  -1  -5  246.90   14.48
  -3   1   5  212.55   12.64
   3  -1  -5  206.31   12.95
  -3   1   6  337.55   26.51
  -3   1   6  308.46   22.48
  -3   1   6  319.87   23.56
   3  -1  -6  239.23   19.19
  -3   1   6  321.59   23.75
   3  -1  -6  248.62   19.24
  -3   1   7  129.83   15.73
  -3   1   7   96.47   11.50
  -3   1   7  104.97   10.36
   3  -1  -7  130.98   18.38
  -3   1   7  105.90   10.77
   3  -1  -7  114.72   15.62
  -3   1   8   46.96    7.55
  -3   1   8   39.30    4.45
  -3   1   8   56.17    6.62
   3  -1  -8   40.20    8.74
   3  -1  -8   37.34    6.91
  -3   1   9   31.74    8.46
  -3   1   9   33.61    7.06
   3  -1  -9   37.22    8.62
   3  -1  -9   41.40    9.68
  -3   1  10   36.71    7.34
   3  -1 -10   38.27   10.85
  -3   1  10   53.17   11.37
  -3   1  11   14.16    7.10
   3  -1 -11   13.93    3.98
  -3   1  11   26.77    7.97
  -3   1  12   12.28    5.34
   3  -1 -12    5.36    2.46
  -3   1  12   10.24    5.21
  -3   2 -11   19.51    7.45
   3  -2  11    9.25    4.69
  -3   2 -10   28.21    7.94
   3  -2  10   19.56    7.50
   3  -2  10   12.79    7.04
  -3   2  -9    8.46    3.05
   3  -2   9    3.11    6.92
   3  -2   9   14.72    7.35
  -3   2  -8  267.48   18.37
   3  -2   8  263.90   19.27
  -3   2  -7  202.23   28.19
  -3   2  -7  240.35   33.76
   3  -2   7  185.49   26.31
  -3   2  -6  219.57   17.83
  -3   2  -6  205.51   17.06
   3  -2   6  289.44   22.90
  -3   2  -5   39.75    4.61
  -3   2  -5   51.10    5.87
   3  -2   5   40.96    6.67
  -3   2  -4   98.55    8.17
  -3   2  -4   73.19    6.46
   3  -2   4  102.75    8.83
  -3   2  -3  942.56   18.01
  -3   2  -3  975.75   18.66
  -3   2  -3  929.71   19.64
  -3   2  -2 1344.38   25.34
  -3   2  -2 1337.68   25.58
   3  -2   2 1140.32   23.46
   3  -2   2 1095.67   22.00
   3  -2   2 1141.29   23.30
   3  -2   2 1170.00   24.01
  -3   2  -2 1326.55   26.58
  -3   2  -1 1231.20   16.03
  -3   2  -1 1227.75   16.72
  -3   2  -1 1261.69   18.18
   3  -2   1 1441.40   19.16
   3  -2   1 1460.00   20.13
  -3   2   0 3114.97   37.56
  -3   2   0 3261.14   39.67
  -3   2   0 3229.83   39.85
   3  -2   0 3074.75   37.89
   3  -2   0 3209.34   37.96
   3  -2   0 3208.45   38.32
   3  -2   0 3201.27   39.46
  -3   2   1  515.54   15.80
  -3   2   1  473.91   14.37
   3  -2  -1  398.20   12.17
   3  -2  -1  409.21   11.73
  -3   2   1  504.44   14.15
  -3   2   1  508.34   15.09
  -3   2   2  750.30   15.93
  -3   2   2  754.37   17.45
  -3   2   2  775.29   17.14
   3  -2  -2  839.94   17.24
   3  -2  -2  866.52   16.53
  -3   2   2  758.17   14.54
  -3   2   2  751.55   15.94
  -3   2   3   34.49    6.32
  -3   2   3   36.23    5.83
  -3   2   3   26.07    3.11
   3  -2  -3   13.82    3.97
   3  -2  -3    9.98    1.25
  -3   2   3   30.97    2.33
   3  -2  -3   16.58    3.38
  -3   2   3   42.87    4.33
  -3   2   4   59.81    7.88
  -3   2   4   45.33    4.01
   3  -2  -4   65.16    5.30
   3  -2  -4   60.01    6.08
  -3   2   4   54.41    3.85
   3  -2  -4   61.19   11.40
  -3   2   5  985.93   31.90
  -3   2   5  917.46   27.85
  -3   2   5  942.30   29.05
   3  -2  -5  959.29   28.86
  -3   2   5  928.29   28.02
   3  -2  -5  946.03   29.99
  -3   2   6  336.09   15.86
  -3   2   6  303.49   11.44
  -3   2   6  350.04   14.28
   3  -2  -6  392.92   15.13
  -3   2   6  324.17   12.16
   3  -2  -6  401.03   16.04
  -3   2   7  363.71   16.97
  -3   2   7  334.38   13.25
  -3   2   7  387.86   16.68
   3  -2  -7  298.49   12.16
  -3   2   7  342.12   13.91
   3  -2  -7  272.57   17.24
  -3   2   8  114.44   13.77
  -3   2   8   52.19   13.48
  -3   2   8  129.31   14.15
   3  -2  -8  164.19   17.83
   3  -2  -8  149.81   16.93
  -3   2   9   29.45    8.17
  -3   2   9   21.44    5.36
   3  -2  -9    9.24    2.84
   3  -2  -9   12.29    4.92
  -3   2  10   13.01    5.41
   3  -2 -10    6.99    3.13
  -3   2  10   10.69    6.35
  -3   2  11   10.88    5.74
  -3   2  11   10.72    5.28
  -3   3 -11   20.51    7.12
   3  -3  11   19.83   10.30
   3  -3  11   53.80   11.19
  -3   3 -10    2.75    4.50
   3  -3  10    0.64    4.92
  -3   3  -9   84.27   13.71
  -3   3  -9   56.21   10.85
   3  -3   9   72.28   13.42
  -3   3  -8  221.28   15.80
  -3   3  -8  167.89   17.08
   3  -3   8  215.55   17.12
  -3   3  -7  336.83   18.42
  -3   3  -7  345.11   19.33
   3  -3   7  314.29   18.18
  -3   3  -6  308.16   23.68
  -3   3  -6  302.27   23.59
   3  -3   6  321.12   25.60
  -3   3  -5 1282.29   39.84
  -3   3  -5 1379.61   42.87
   3  -3   5 1316.13   41.39
  -3   3  -4  367.57   20.62
  -3   3  -4  356.15   20.14
  -3   3  -4  359.04   21.67
  -3   3  -4  360.07   21.44
   3  -3   4  344.36   21.75
  -3   3  -3  220.28   12.76
  -3   3  -3  219.49   13.31
  -3   3  -3  209.98   12.84
   3  -3   3  262.78   22.07
   3  -3   3  307.31   19.58
   3  -3   2   93.57    5.91
  -3   3  -2  111.30    6.68
  -3   3  -2  109.79    7.14
   3  -3   2   89.93   12.09
   3  -3   2   94.17    7.88
  -3   3  -2   89.64    6.44
   3  -3   1 4557.84   84.22
  -3   3  -1 4381.46   80.86
  -3   3  -1 4635.21   86.35
   3  -3   1 4360.61   80.20
   3  -3   1 4432.51   82.56
  -3   3  -1 3970.38   73.88
  -3   3   0 2413.64   45.50
  -3   3   0 2575.46   49.24
   3  -3   0 2597.08   47.94
   3  -3   0 2698.96   49.93
   3  -3   0 2616.19   49.67
  -3   3   0 2401.53   45.57
   3  -3  -1 5994.22  331.76
   3  -3  -1 5606.62  103.43
   3  -3  -1 5883.12  325.00
   3  -3  -1 5815.71  105.68
   3  -3  -1 5898.84  326.53
  -3   3   1 5693.52  105.08
   3  -3  -2 1637.12   32.47
  -3   3   2 1341.60   26.99
   3  -3  -2 1520.13   29.86
   3  -3  -2 1555.28   30.97
  -3   3   3 1478.08   40.44
  -3   3   3 1439.68   38.49
   3  -3  -3 1150.75   30.82
   3  -3  -3 1278.79   34.66
  -3   3   4  172.50   15.31
  -3   3   4  181.00   14.62
   3  -3  -4  319.27   23.65
  -3   3   4  188.47   13.76
   3  -3  -4  324.05   24.28
  -3   3   5  130.10   13.40
  -3   3   5  117.06   10.15
  -3   3   5  156.21   14.46
   3  -3  -5  102.38    8.74
  -3   3   5  131.94   11.07
   3  -3  -5  102.30   19.20
  -3   3   6  105.74   13.62
  -3   3   6   72.53    8.38
   3  -3  -6   84.64    8.27
  -3   3   6   68.88    7.05
   3  -3  -6   90.66   14.67
  -3   3   7  215.82   30.97
  -3   3   7  239.66   33.06
  -3   3   7  214.73   29.27
   3  -3  -7  258.04   37.73
  -3   3   8  160.78   13.27
  -3   3   8  148.13   10.74
  -3   3   8  150.36    9.48
   3  -3  -8  156.77   10.61
  -3   3   9  386.79   17.35
  -3   3   9  387.43   15.65
  -3   3   9  385.11   15.47
   3  -3  -9  400.39   17.33
  -3   3  10   24.54    9.03
  -3   3  10   16.90    6.93
  -3   3  11   40.91    7.70
  -3   3  11   31.27   11.42
  -3   4 -11   25.58    6.60
  -3   4 -11   31.42    8.54
   3  -4  11   26.80    8.78
  -3   4 -10  100.72    8.88
  -3   4 -10  140.23   12.05
   3  -4  10  103.50   10.36
  -3   4  -9  272.73   17.44
  -3   4  -9  256.07   17.15
   3  -4   9  281.89   18.80
  -3   4  -8  120.07   12.13
  -3   4  -8  108.92   14.50
   3  -4   8   82.56   11.58
  -3   4  -7   56.34   13.31
  -3   4  -7   48.74   13.21
   3  -4   7   48.00   13.35
  -3   4  -6  602.61   23.26
  -3   4  -6  608.47   23.54
  -3   4  -6  669.48   28.56
  -3   4  -6  623.19   26.35
   3  -4   6  619.20   27.10
  -3   4  -5 1399.63   47.71
  -3   4  -5 1375.90   48.59
  -3   4  -5 1393.90   49.17
   3  -4   5 1370.45   48.84
   3  -4   4 1045.97   31.45
  -3   4  -4 1055.94   31.63
  -3   4  -4 1085.17   34.37
  -3   4  -4 1084.77   34.00
   3  -4   4 1053.29   34.34
   3  -4   3 2294.39   59.41
  -3   4  -3 2197.20   56.79
  -3   4  -3 2294.35   59.95
   3  -4   3 2039.89   53.30
   3  -4   3 2249.73   59.74
   3  -4   2  408.62   23.56
  -3   4  -2  366.17   21.05
  -3   4  -2  391.22   23.65
  -3   4  -2  395.03   22.96
   3  -4   2  403.87   23.08
   3  -4   2  423.70   24.89
   3  -4   1  721.01   21.34
  -3   4  -1  680.73   18.85
  -3   4  -1  735.87   21.44
  -3   4  -1  752.38   20.21
   3  -4   1  719.99   19.40
   3  -4   0  763.41   21.46
   3  -4   0  734.47   19.28
   3  -4   0  756.74   20.00
   3  -4  -1   35.23    6.49
  -3   4   1   40.52    5.73
   3  -4  -1   21.78    3.60
   3  -4  -2  876.41   25.22
  -3   4   2  801.02   23.14
   3  -4  -2  881.27   24.97
   3  -4  -3  890.48   28.66
  -3   4   3  779.54   25.49
   3  -4  -3  885.03   28.26
   3  -4  -4 1925.09   67.36
  -3   4   4 1863.84   65.15
   3  -4  -4 1783.66   61.93
  -3   4   5  193.29   20.79
  -3   4   5  198.53   10.52
  -3   4   5  175.83   17.16
  -3   4   5  174.03   17.05
   3  -4  -5  164.93   17.29
  -3   4   6  106.12   16.32
  -3   4   6  124.21   18.10
  -3   4   6  103.01   14.15
  -3   4   6  115.95   16.11
   3  -4  -6  122.59   24.96
  -3   4   7   48.41   12.22
  -3   4   7   45.85   10.66
  -3   4   7   38.90    8.00
   3  -4  -7   22.71    6.54
  -3   4   8   12.28    7.96
  -3   4   8   16.27    5.60
  -3   4   8   11.03    3.07
   3  -4  -8    5.85    3.27
  -3   4   9   26.16    9.48
  -3   4   9   24.42    6.64
   3  -4  -9   25.30    7.54
  -3   4  10   19.27    8.21
  -3   4  10    7.72    3.76
  -3   5 -11   53.23   10.05
  -3   5 -11   65.28   10.32
   3  -5  11   54.64   12.44
  -3   5 -10  175.68   14.16
  -3   5 -10  161.70   27.62
   3  -5  10  169.14   16.48
  -3   5  -9   93.33   14.86
  -3   5  -9  104.71   19.60
   3  -5   9   95.70   16.11
  -3   5  -8  140.00   13.56
  -3   5  -8  160.75   20.59
   3  -5   8  153.23   15.41
  -3   5  -7  135.70   18.43
  -3   5  -7  138.65   18.86
  -3   5  -7  151.65   22.02
  -3   5  -7  168.46   30.01
   3  -5   7  201.68   29.44
   3  -5   6  108.25   11.91
  -3   5  -6   94.93    9.32
  -3   5  -6  119.32   13.04
  -3   5  -6  122.78   19.48
   3  -5   6  100.82   12.08
   3  -5   5   77.76    9.94
  -3   5  -5   97.59    8.62
  -3   5  -5  108.56   10.88
  -3   5  -5  116.17   15.12
   3  -5   5   78.84    9.37
   3  -5   4  860.09   26.49
  -3   5  -4  803.58   24.75
  -3   5  -4  871.28   29.33
  -3   5  -4  841.49   27.03
   3  -5   4  885.33   30.02
   3  -5   3 1450.42   45.27
  -3   5  -3 1369.50   41.20
  -3   5  -3 1486.12   47.06
   3  -5   3 1351.10   40.81
   3  -5   3 1495.43   46.44
   3  -5   2 1403.27   37.73
  -3   5  -2 1263.68   35.87
  -3   5  -2 1247.79   33.27
   3  -5   2 1248.18   32.91
   3  -5   2 1350.72   37.09
   3  -5   1 2098.60   55.46
  -3   5  -1 2144.12   57.18
  -3   5  -1 2128.61   55.02
   3  -5   1 1957.51   50.56
   3  -5   1 2077.32   55.06
   3  -5   0 1596.48   48.71
  -3   5   0 1431.67   44.36
  -3   5   0 1460.27   43.03
   3  -5   0 1563.40   46.04
   3  -5   0 1656.63   50.39
   3  -5  -1   58.64    8.55
  -3   5   1   86.56    8.79
   3  -5  -1   63.17    7.02
   3  -5  -2   17.95    4.65
  -3   5   2   22.97    5.31
   3  -5  -2   17.60    4.89
   3  -5  -3 1093.32   44.23
  -3   5   3  983.10   40.29
   3  -5  -3 1082.87   43.35
   3  -5  -4  374.86   17.38
  -3   5   4  353.55   17.19
   3  -5  -4  335.08   14.84
   3  -5  -5  570.82   21.93
  -3   5   5  619.26   24.72
   3  -5  -5  587.02   21.60
  -3   5   6  109.25   13.34
  -3   5   6  130.06   15.24
   3  -5  -6  123.45   23.26
  -3   5   7   75.74   11.12
  -3   5   7   80.51   11.53
   3  -5  -7   63.48   12.50
  -3   5   8   49.33    9.73
  -3   5   8   50.57    6.71
   3  -5  -8   48.84    6.29
  -3   5   9   45.47   10.79
  -3   5   9   32.32    7.30
   3  -5  -9   38.17    8.02
  -3   6 -11    5.14    4.20
  -3   6 -11    7.85    3.04
   3  -6  11   12.16    8.42
  -3   6 -10   55.16   12.94
   3  -6  10   49.70   11.50
  -3   6  -9   60.60    8.43
  -3   6  -9   62.02   13.71
   3  -6   9   49.99   10.42
   3  -6   8  450.95   22.73
  -3   6  -8  477.14   26.48
  -3   6  -8  492.50   37.72
   3  -6   8  496.85   28.91
   3  -6   7  167.40   17.47
  -3   6  -7  187.16   19.30
  -3   6  -7  222.48   24.25
  -3   6  -7  235.42   32.35
   3  -6   7  207.09   24.49
   3  -6   6 2071.82   76.00
  -3   6  -6 2032.98   74.20
  -3   6  -6 2204.24  463.41
  -3   6  -6 2226.80  468.20
   3  -6   6 2119.83   79.80
   3  -6   5 1073.37   43.38
  -3   6  -5 1266.50   51.58
  -3   6  -5 1178.00   49.70
   3  -6   5 1201.37   48.78
   3  -6   4  670.89   28.83
  -3   6  -4  696.96   29.34
  -3   6  -4  687.36   30.46
   3  -6   4  655.74   28.55
   3  -6   3  173.20   16.25
  -3   6  -3  151.81   15.34
  -3   6  -3  179.24   17.98
   3  -6   3  148.44   12.85
   3  -6   3  149.47   14.81
   3  -6   2 1051.01   37.52
  -3   6  -2 1097.87   40.33
  -3   6  -2 1071.83   37.22
   3  -6   2 1028.32   35.72
   3  -6   2 1063.55   38.20
   3  -6   1 1780.62   62.12
  -3   6  -1 1701.18   60.05
  -3   6  -1 1574.88   53.73
   3  -6   1 1633.60   55.75
   3  -6   1 1702.72   59.40
   3  -6   0 1067.28   39.73
  -3   6   0 1126.55   41.29
  -3   6   0 1129.82   38.40
   3  -6   0 1011.60   34.50
   3  -6   0 1051.42   37.68
   3  -6  -1  184.71   20.80
  -3   6   1  209.72   17.84
   3  -6  -1  165.01   13.57
   3  -6  -2  505.38   21.02
  -3   6   2  521.11   23.88
   3  -6  -2  521.02   21.13
  -3   6   3  137.70   21.42
   3  -6  -3  149.26   21.10
   3  -6  -4  143.96   16.30
  -3   6   4  133.06   18.28
   3  -6  -4  135.45   14.96
   3  -6  -5   68.92    9.69
  -3   6   5   94.48   11.90
   3  -6  -5   87.65   16.24
  -3   6   6  172.54   11.46
   3  -6  -6  136.46   18.97
  -3   6   7  159.97   13.32
  -3   6   7  198.41   16.83
   3  -6  -7  181.37   13.10
  -3   6   8   25.24    7.76
  -3   6   8   34.92    9.62
   3  -6  -8   41.35    9.35
  -3   7 -11   34.06    7.68
  -3   7 -11   42.18   10.97
   3  -7  11   56.79   13.56
  -3   7 -10   88.57    9.57
  -3   7 -10   68.78   11.34
   3  -7  10   80.30    9.37
  -3   7  -9    9.77    3.97
  -3   7  -9   10.75    3.56
   3  -7   9   13.58    8.82
   3  -7   8  156.70   12.32
  -3   7  -8  154.07   11.56
  -3   7  -8  152.75   24.63
   3  -7   8  168.50   13.18
   3  -7   7  273.55   17.23
  -3   7  -7  378.67   24.61
  -3   7  -7  393.18   30.94
   3  -7   7  289.23   21.05
   3  -7   6  875.11   29.87
  -3   7  -6  824.70   30.37
  -3   7  -6  768.43   27.56
   3  -7   5  201.19   30.17
  -3   7  -5  354.71   21.96
  -3   7  -5  333.49   25.34
   3  -7   5  198.59   28.06
   3  -7   4  493.66   20.34
  -3   7  -4  483.51   21.12
  -3   7  -4  499.46   20.32
   3  -7   4  487.49   21.49
   3  -7   3  137.87   23.88
  -3   7  -3  107.74   12.66
  -3   7  -3  114.37   17.48
   3  -7   3  129.64   14.22
   3  -7   2  322.07   31.43
  -3   7  -2  283.09   23.35
  -3   7  -2  305.07   22.74
   3  -7   2  269.52   20.19
   3  -7   2  319.37   25.02
   3  -7   1  282.36   20.72
  -3   7  -1  287.71   14.62
  -3   7  -1  271.07   10.64
   3  -7   1  237.65    9.69
   3  -7   1  246.93   11.78
   3  -7   0  224.72   19.25
  -3   7   0  180.96   20.56
  -3   7   0  153.07   14.89
   3  -7   0  205.54    7.81
   3  -7   0  238.74   12.39
   3  -7  -1  924.27   46.63
  -3   7   1 1035.58   52.61
   3  -7  -1  938.14   46.60
   3  -7  -2 1048.88   37.31
  -3   7   2  875.83   32.97
   3  -7  -2  983.27   33.64
   3  -7  -3  234.93   26.05
  -3   7   3  266.65   19.07
   3  -7  -3  221.64   14.78
   3  -7  -4  143.66   11.92
  -3   7   4  147.58   13.52
   3  -7  -4  161.16   11.03
   3  -7  -5   38.15    9.96
  -3   7   5   24.05    8.58
   3  -7  -5   20.70    5.10
   3  -7  -6   13.42    5.33
  -3   7   6    5.77    5.20
   3  -7  -6    3.38    1.97
  -3   7   7    1.20    5.07
  -3   7   7    4.68    4.75
  -3   8 -11  141.71   10.97
   3  -8  11  112.78   13.89
  -3   8 -10  182.23   14.80
  -3   8 -10  152.28   26.99
   3  -8  10  152.12   13.84
  -3   8  -9  149.78   12.43
  -3   8  -9  112.02   23.17
   3  -8   9  111.33   11.47
   3  -8   8   20.01    5.30
  -3   8  -8   40.82    9.12
  -3   8  -8   16.05    5.64
   3  -8   8   16.35    8.49
   3  -8   7   31.62    8.78
  -3   8  -7   40.86    8.88
  -3   8  -7   44.51   12.38
   3  -8   7   29.02    8.28
   3  -8   6  263.34   18.63
  -3   8  -6  267.04   19.36
  -3   8  -6  246.18   23.22
   3  -8   6  247.86   17.79
   3  -8   5  328.97   14.13
  -3   8  -5  359.56   16.62
  -3   8  -5  393.61   26.96
   3  -8   5  311.66   15.26
   3  -8   4  763.56   29.77
  -3   8  -4  643.10   25.03
  -3   8  -4  640.17   22.48
   3  -8   4  756.04   28.00
   3  -8   3  895.51   34.80
  -3   8  -3  938.51   34.28
  -3   8  -3  934.42   32.28
   3  -8   3  877.01   31.15
   3  -8   2  496.32   19.73
  -3   8  -2  509.90   21.81
  -3   8  -2  478.23   17.29
   3  -8   2  426.23   14.93
   3  -8   2  465.98   18.66
   3  -8   1  174.42   33.04
  -3   8  -1  137.17   16.59
  -3   8  -1  126.00   13.04
   3  -8   1  177.08   19.42
   3  -8   0   68.74   17.31
  -3   8   0   54.54   11.55
  -3   8   0   56.30    8.14
   3  -8   0   45.87    6.62
   3  -8   0   70.34   11.62
   3  -8  -1  330.51   27.95
  -3   8   1  328.19   22.72
   3  -8  -1  334.32   21.40
   3  -8  -2  180.41   19.62
  -3   8   2  123.50   13.05
   3  -8  -2  182.47   11.97
   3  -8  -3  190.76   28.82
  -3   8   3  236.88   13.61
   3  -8  -3  179.80    9.02
   3  -8  -4  116.47   10.65
  -3   8   4   85.62   10.47
   3  -8  -4   99.89   16.03
   3  -8  -5    6.08    4.80
  -3   8   5   16.02    7.97
   3  -8  -5    4.40    2.43
  -3   8   6   36.88    7.87
  -3   9 -10  138.78   15.30
  -3   9 -10  110.82   26.28
   3  -9  10  166.34   20.16
  -3   9  -9  155.78   14.56
  -3   9  -9  115.91   22.21
   3  -9   9  142.96   16.66
   3  -9   8  444.41   28.20
  -3   9  -8  420.61   27.62
  -3   9  -8  483.87   43.77
   3  -9   8  454.96   31.13
   3  -9   7  187.87   17.78
  -3   9  -7  210.74   12.95
  -3   9  -7  210.97   24.52
   3  -9   7  161.79   11.91
   3  -9   6  111.79   21.57
  -3   9  -6  108.98   17.20
  -3   9  -6  116.01   14.21
   3  -9   6  135.47   12.22
   3  -9   5   28.61    7.64
  -3   9  -5   12.33    6.28
  -3   9  -5   24.98    5.92
   3  -9   5   20.14    6.53
   3  -9   4  456.41   26.26
  -3   9  -4  459.79   25.86
  -3   9  -4  429.31   23.65
   3  -9   4  437.49   24.19
   3  -9   3  402.32   34.85
  -3   9  -3  489.66   28.43
  -3   9  -3  431.01   23.78
   3  -9   3  408.89   22.91
   3  -9   2  667.55   35.30
  -3   9  -2  574.09   32.90
  -3   9  -2  524.21   26.73
   3  -9   2  664.22   35.12
   3  -9   1  526.37   35.58
  -3   9  -1  645.28  105.36
   3  -9   1  562.14   31.96
   3  -9   0  319.70   39.45
  -3   9   0  287.24   19.52
   3  -9   0  304.13   18.12
   3  -9  -1   85.35   14.81
  -3   9   1   91.40   16.39
   3  -9  -1   79.56   10.56
   3  -9  -2   58.03   12.60
  -3   9   2   57.33   10.79
   3  -9  -2   63.18    9.28
   3  -9  -3   47.14    9.59
  -3   9   3   54.10   11.88
   3  -9  -3   28.85   10.21
   3  -9  -4   81.34   10.50
  -3   9   4   33.75   10.09
  -3  10 -10   39.92    7.01
  -3  10 -10   38.53    8.37
   3 -10  10   22.80   10.39
  -3  10  -9   85.61   11.58
  -3  10  -9  104.66   19.82
   3 -10   9  116.25   14.01
   3 -10   8  150.94   17.34
  -3  10  -8  238.94   18.08
  -3  10  -8  175.08   27.05
   3 -10   8  194.37   16.78
   3 -10   7  351.01   22.97
  -3  10  -7  366.16   25.51
  -3  10  -7  359.28   34.86
   3 -10   7  426.16   28.47
   3 -10   6  433.18   30.88
  -3  10  -6  502.97   80.48
  -3  10  -6  464.94   29.81
   3 -10   6  475.18   75.96
   3 -10   5  119.88   24.55
  -3  10  -5  127.01   12.28
  -3  10  -5  122.59   13.63
   3 -10   5  155.14   12.85
   3 -10   4   96.00   14.92
  -3  10  -4   85.06    9.31
  -3  10  -4   67.35   15.44
   3 -10   4  103.20    9.73
   3 -10   3   14.66    7.21
  -3  10  -3   24.14    9.00
  -3  10  -3    2.31    1.95
   3 -10   3   14.28    6.56
   3 -10   2  186.77   29.73
  -3  10  -2  187.62   16.67
   3 -10   2  188.16   13.54
   3 -10   1  254.72   32.86
  -3  10  -1  331.05   24.79
   3 -10   1  270.46   18.42
   3 -10   0  256.31   30.67
  -3  10   0  242.96   19.03
   3 -10   0  297.65   20.44
   3 -10  -1  201.03   29.10
  -3  10   1  213.67   18.28
   3 -10  -1  247.44   16.89
   3 -10  -2   96.09   15.25
  -3  10   2  105.35   14.39
   3 -10  -3   15.62    8.40
  -3  10   3   22.21   10.52
   3 -11   8   17.36    6.83
  -3  11  -8    8.84    5.19
  -3  11  -8    4.07    2.69
   3 -11   8   13.26    5.86
   3 -11   7   67.92   17.94
  -3  11  -7  114.05   13.84
  -3  11  -7   71.55   13.55
   3 -11   7   75.66   11.06
   3 -11   6  214.17   25.47
  -3  11  -6  253.32   20.69
  -3  11  -6  207.13   16.66
   3 -11   6  246.70   19.12
   3 -11   5  330.13   37.40
  -3  11  -5  315.73   25.19
   3 -11   5  314.95   22.31
   3 -11   4  228.28   26.56
  -3  11  -4  281.75   22.24
   3 -11   4  257.47   18.62
   3 -11   3   68.15   17.64
  -3  11  -3   98.47   11.44
   3 -11   3   73.36    9.05
   3 -11   2   60.96   14.17
  -3  11  -2   76.26   15.44
   3 -11   2   70.07    8.60
   3 -11   1   17.96    6.08
  -3  11  -1   -2.31    6.28
   3 -11   0   -0.59    5.00
  -3  11   0    8.06    6.68
   3 -11   0    0.93    2.39
   3 -12   5   30.94   12.32
  -3  12  -5   54.89   11.60
   3 -12   5   67.63   10.15
   3 -12   4  110.28   19.70
  -3  12  -4  167.78   19.33
   3 -12   4  111.45   13.18
   4  11  -5   18.11   10.23
   4  11  -5   23.75   10.07
  -4 -11   6    8.70    5.53
   4  11  -6    1.40    5.98
   4  11  -6   16.25    6.94
  -4 -11   7   45.87   10.99
   4  11  -7   54.86    9.51
   4  11  -7   51.31    7.55
  -4 -11   8   10.91    6.11
   4  11  -8   14.39    5.91
   4  11  -8   25.38    7.66
  -4 -11   9   12.74    8.74
   4  11  -9    7.37    4.03
   4  11  -9   19.01    9.05
  -4 -10   2    9.71    6.08
   4  10  -2    1.65    7.12
   4  10  -2    4.00    5.44
  -4 -10   3   11.66    5.07
   4  10  -3   43.42   10.44
   4  10  -3   26.88    9.13
  -4 -10   4   32.47    8.06
   4  10  -4   44.18    9.40
   4  10  -4   52.92   11.58
  -4 -10   5   90.97    9.67
   4  10  -5  113.06   13.65
   4  10  -5   81.67   10.07
  -4 -10   6   17.99    6.50
   4  10  -6    8.20    7.57
   4  10  -6    5.52    5.20
  -4 -10   7   10.19    7.37
   4  10  -7   33.89    9.99
   4  10  -7   49.05    7.36
  -4 -10   7   20.53    5.40
  -4 -10   8   36.13   10.07
   4  10  -8   33.84    9.66
   4  10  -8   28.68    8.59
  -4 -10   8   24.99    6.49
  -4 -10   9   87.78   10.92
   4  10  -9   71.20    9.73
   4  10  -9   71.36   10.78
  -4 -10   9   88.04    9.42
  -4 -10  10   34.77    9.10
   4  10 -10   18.06    6.08
   4  10 -10   17.45    8.46
  -4 -10  10   24.80    5.67
  -4 -10  11   10.12    7.88
   4  10 -11    7.61    5.21
  -4 -10  11    2.70    5.16
  -4  -9   0    7.78    4.38
   4   9   0    4.26    6.31
   4   9   0   14.97    8.50
  -4  -9   1   16.56    7.24
   4   9  -1   30.53   12.92
   4   9  -1   24.09    8.74
  -4  -9   2   40.02   11.13
   4   9  -2   54.57    9.71
   4   9  -2   56.00    8.20
  -4  -9   3  218.46   17.20
   4   9  -3  204.80   17.01
   4   9  -3  202.82   15.62
  -4  -9   4   53.08   11.00
   4   9  -4   69.24   13.87
   4   9  -4   46.82   10.61
  -4  -9   5  177.74   13.54
   4   9  -5  147.93   10.24
   4   9  -5  148.60   11.63
  -4  -9   6   20.94    7.92
   4   9  -6    8.47    5.18
   4   9  -6    9.79    5.82
  -4  -9   6   13.28    3.81
  -4  -9   7   11.17    6.41
   4   9  -7   15.77    5.41
   4   9  -7   15.13    8.38
  -4  -9   7    9.82    4.67
  -4  -9   8   44.77   10.37
   4   9  -8   75.34    9.66
   4   9  -8   69.90   13.95
  -4  -9   8   70.47   12.92
  -4  -9   9   21.45    8.23
   4   9  -9   20.20    5.83
   4   9  -9   26.07    9.02
  -4  -9   9   10.15    5.02
  -4  -9  10  118.24   12.32
   4   9 -10   86.51    7.96
   4   9 -10  111.03   10.64
  -4  -9  10  101.16    9.78
  -4  -9  11   75.38   11.83
   4   9 -11   86.23   11.83
  -4  -9  11  117.07   13.19
  -4  -9  12    6.99    5.28
   4   9 -12    8.54    5.45
  -4  -9  12   11.75    7.01
  -4  -8  -2    7.19    2.47
   4   8   2   19.83    7.83
   4   8   2   23.61   10.12
  -4  -8  -1   11.53    5.26
   4   8   1   32.45   11.57
   4   8   1   32.40   12.28
  -4  -8   0    3.88    4.01
   4   8   0   27.51    9.44
   4   8   0   12.06    6.22
  -4  -8   1    4.12    4.26
   4   8  -1    5.88    6.24
   4   8  -1    6.39    6.14
  -4  -8   2    5.49    4.23
   4   8  -2    8.30    7.31
   4   8  -2    5.22    5.98
  -4  -8   3  124.70   14.48
   4   8  -3   83.68   11.54
   4   8  -3   91.79   13.10
  -4  -8   4   85.16   10.64
   4   8  -4  134.31   17.31
   4   8  -4  105.20   13.41
  -4  -8   4   86.25    9.19
  -4  -8   5  300.42   18.31
   4   8  -5  247.94   17.41
   4   8  -5  253.80   16.55
  -4  -8   5  293.66   16.09
  -4  -8   6   85.76   12.15
   4   8  -6   84.61   10.26
   4   8  -6   95.75   12.24
  -4  -8   6   78.67    9.85
  -4  -8   7    9.28    6.31
   4   8  -7   24.36    6.92
   4   8  -7   22.52    7.21
  -4  -8   7    5.39    3.65
  -4  -8   8   10.45    6.28
   4   8  -8   30.26    7.82
   4   8  -8   18.05   11.45
  -4  -8   8   23.05    6.67
  -4  -8   9   26.33    9.53
   4   8  -9   20.60    4.91
   4   8  -9   37.49   10.14
  -4  -8   9   28.95    6.17
  -4  -8  10   44.95   10.55
   4   8 -10   17.22    4.19
   4   8 -10   22.17    7.77
  -4  -8  10   35.78   10.22
  -4  -8  11   32.44    7.11
   4   8 -11   21.47    6.56
  -4  -8  11    7.73    6.50
  -4  -8  12  105.42   11.43
   4   8 -12  104.23   10.69
  -4  -8  12  109.24   11.82
  -4  -8  13   84.24    8.88
  -4  -8  13   76.09   10.47
  -4  -7  -3   12.53    4.72
   4   7   3   13.15    7.43
   4   7   3   19.49   10.28
  -4  -7  -2   29.53   10.37
   4   7   2   54.11    9.09
   4   7   2   59.01    9.76
  -4  -7  -1  112.01    9.77
   4   7   1   86.29   12.29
   4   7   1   74.78   10.44
  -4  -7   0  114.44   20.29
   4   7   0  121.00   11.92
   4   7   0  112.27   20.18
  -4  -7   1   98.74   12.80
   4   7  -1   65.43   10.46
   4   7  -1   67.46   10.80
  -4  -7   2  102.17   11.10
   4   7  -2  114.38   14.66
   4   7  -2  148.86   16.63
  -4  -7   3   92.34   12.78
   4   7  -3   81.90   14.17
   4   7  -3   93.25   14.68
  -4  -7   3   67.01    9.82
  -4  -7   3   83.31   12.15
   4   7  -4   44.46    9.02
   4   7  -4   31.24    9.41
  -4  -7   4   37.51    5.99
  -4  -7   4   35.20    5.94
  -4  -7   5  102.62   16.52
   4   7  -5  131.09   19.94
   4   7  -5  125.21   18.84
  -4  -7   5   56.73   16.02
  -4  -7   5  102.29   14.83
  -4  -7   6   79.07   17.99
   4   7  -6  103.23   15.69
   4   7  -6  131.99   20.28
  -4  -7   6   89.59   19.94
  -4  -7   7  434.51   19.39
   4   7  -7  355.47   15.56
   4   7  -7  377.93   16.91
  -4  -7   7  399.20   16.21
  -4  -7   8  230.41   24.93
   4   7  -8  203.84   21.99
   4   7  -8  198.85   22.73
  -4  -7   8  223.78   24.63
  -4  -7   9   18.92    6.99
   4   7  -9   32.50    7.12
   4   7  -9   35.02   10.24
  -4  -7   9   12.57    6.42
  -4  -7  10   44.61    9.14
   4   7 -10   37.00    6.01
   4   7 -10   38.35    9.01
  -4  -7  10   59.30   11.03
  -4  -7  11    5.37    5.02
   4   7 -11   13.68    5.55
  -4  -7  11   15.67    8.98
  -4  -7  12   23.88   10.20
   4   7 -12    8.50    5.41
  -4  -7  12    6.94    6.46
  -4  -7  13   20.23    8.65
  -4  -7  13    9.46    6.90
  -4  -6  -5    0.64    4.43
   4   6   5   13.60    7.10
  -4  -6  -4    3.03    3.15
  -4  -6  -4   15.41    6.52
   4   6   4    9.92    7.04
  -4  -6  -3    5.43    2.51
  -4  -6  -3    5.28    4.95
   4   6   3    5.52    8.71
  -4  -6  -2    4.34    3.20
  -4  -6  -2    1.29    4.95
   4   6   2   15.19    9.11
  -4  -6  -1   63.47    8.36
  -4  -6  -1   41.78   10.35
   4   6   1   67.46   10.74
  -4  -6   0   62.38   10.58
  -4  -6   0   51.96    9.95
   4   6   0   86.25   15.85
  -4  -6   1  107.07   15.52
  -4  -6   1  106.98   16.56
   4   6  -1  135.49   22.25
  -4  -6   2  377.25   17.13
  -4  -6   2  402.84   18.86
   4   6  -2  368.37   19.50
  -4  -6   3   10.29    5.24
   4   6  -3   14.28    5.90
   4   6  -3   19.94    7.06
  -4  -6   3    7.19    1.50
  -4  -6   3   11.83    2.49
  -4  -6   4   70.61    9.05
   4   6  -4   71.43   10.18
   4   6  -4   90.85   12.00
  -4  -6   4   50.36    5.68
  -4  -6   4   62.59    7.60
  -4  -6   5   50.25    7.64
   4   6  -5   46.79    7.07
   4   6  -5   36.21    7.34
  -4  -6   5   45.18    6.66
  -4  -6   6   65.09   10.80
   4   6  -6   94.91   11.38
   4   6  -6   91.98   12.57
  -4  -6   6   58.46    8.98
  -4  -6   7  437.92   20.03
   4   6  -7  371.55   15.88
   4   6  -7  411.84   19.79
  -4  -6   7  397.54   17.98
  -4  -6   8   33.97    9.71
   4   6  -8   33.58   11.22
   4   6  -8   89.66   19.72
   4   6  -8   79.56   18.50
  -4  -6   8   27.66    8.11
  -4  -6   9  206.87   23.50
   4   6  -9  192.15   20.00
   4   6  -9  206.78   23.09
  -4  -6   9  173.96   19.45
  -4  -6  10   69.98   10.25
   4   6 -10   65.67    7.01
   4   6 -10   63.65    8.85
  -4  -6  10   88.86   14.52
  -4  -6  11   11.97    5.92
   4   6 -11    3.20    4.18
  -4  -6  11    6.59    6.92
  -4  -6  12    8.09    5.06
   4   6 -12    0.91    4.35
  -4  -6  12   11.03    7.16
  -4  -6  13   14.31    8.14
   4   6 -13   13.63    5.18
  -4  -6  13    6.55    7.23
  -4  -6  14   15.33    7.51
   4   6 -14    8.51    3.66
  -4  -6  14   10.73    9.41
  -4  -5  -6   11.07    6.65
   4   5   6   -0.08    6.25
  -4  -5  -5    9.21    3.48
  -4  -5  -5   21.29    8.39
   4   5   5   35.37   10.50
  -4  -5  -4   50.97   12.16
   4   5   4   21.23    9.63
  -4  -5  -3   75.36   17.01
  -4  -5  -3  102.72   16.20
   4   5   3   82.43   14.44
  -4  -5  -2   73.42    8.24
  -4  -5  -2   77.49   10.99
   4   5   2   84.87   12.06
  -4  -5  -1   18.21    4.38
  -4  -5  -1   14.20    6.28
   4   5   1   11.07    7.52
  -4  -5   0  110.51   12.44
  -4  -5   0  107.68   12.51
   4   5   0   96.35   12.65
  -4  -5   1  513.04   22.49
  -4  -5   1  509.90   22.54
   4   5  -1  550.13   25.23
  -4  -5   2   79.30    9.94
  -4  -5   2   76.41    8.99
   4   5  -2  116.06   15.21
  -4  -5   2   77.05    7.44
  -4  -5   2   72.05    7.11
  -4  -5   3  316.13   13.92
  -4  -5   3  331.54   13.77
   4   5  -3  351.39   17.80
  -4  -5   3  293.27   11.09
  -4  -5   3  310.74   12.42
  -4  -5   4  293.10   14.08
  -4  -5   4  269.72   11.49
   4   5  -4  343.69   16.17
  -4  -5   4  249.69   20.79
  -4  -5   4  276.77   11.90
  -4  -5   5  440.75   18.21
   4   5  -5  387.13   15.81
   4   5  -5  407.60   17.77
  -4  -5   5  428.22   16.82
  -4  -5   6   29.61    8.66
   4   5  -6   15.92    3.99
   4   5  -6   19.90    4.55
   4   5  -6   15.04    5.04
  -4  -5   6   23.96    6.84
  -4  -5   7   27.29    6.50
   4   5  -7    8.92    2.76
   4   5  -7   18.07    5.23
   4   5  -7   16.73    5.29
  -4  -5   7   16.34    5.61
  -4  -5   8  678.55   28.72
   4   5  -8  584.33   21.83
   4   5  -8  695.46   26.05
  -4  -5   8  650.49   27.35
  -4  -5   9  368.34   20.92
   4   5  -9  317.96   15.61
   4   5  -9  347.64   17.12
   4   5  -9  343.55   19.07
  -4  -5   9  367.95   22.28
  -4  -5  10  283.26   20.26
   4   5 -10  326.58   22.58
  -4  -5  10  294.85   21.16
  -4  -5  11   61.81   12.05
   4   5 -11   51.78    9.92
  -4  -5  11   38.78    9.52
  -4  -5  12   27.48    7.23
   4   5 -12   58.87   12.45
  -4  -5  13    9.57    7.22
   4   5 -13   11.35    5.51
  -4  -5  13   14.54    7.25
  -4  -5  14   17.44    6.71
   4   5 -14   10.20    4.45
  -4  -5  14    7.67    6.70
  -4  -4  -7   13.28    5.11
   4   4   7    8.81    6.89
  -4  -4  -6   13.29    5.76
   4   4   6   41.35   11.06
  -4  -4  -5   55.15   11.80
   4   4   5   79.73   12.08
  -4  -4  -4   38.21   10.99
  -4  -4  -4   57.66   11.04
   4   4   4   37.19   10.52
  -4  -4  -3  138.64   12.44
  -4  -4  -3  174.19   18.19
   4   4   3  184.37   35.94
  -4  -4  -2   37.92    8.94
  -4  -4  -2   29.75    8.04
   4   4   2   18.23    8.53
  -4  -4  -1  483.61   19.59
  -4  -4  -1  485.83   20.77
   4   4   1  495.98   22.14
  -4  -4   0   22.30    4.95
  -4  -4   0   25.53    5.56
   4   4   0   29.20    9.56
  -4  -4   1  152.45   13.90
  -4  -4   1  143.76   13.30
   4   4  -1  149.23   15.00
   4   4  -1  127.94   10.63
  -4  -4   1  121.81   10.13
  -4  -4   2  111.65    9.75
  -4  -4   2  123.08   10.91
   4   4  -2  150.07   13.34
   4   4  -2  126.11    9.65
  -4  -4   2  106.09    8.27
  -4  -4   3  528.50   18.53
  -4  -4   3  554.90   19.16
   4   4  -3  509.42   18.68
   4   4  -3  479.25   39.36
  -4  -4   3  514.51   16.26
  -4  -4   4  816.75   27.14
  -4  -4   4  751.88   23.95
   4   4  -4  705.29   22.20
   4   4  -4  790.85   26.51
   4   4  -4  765.37   24.16
  -4  -4   4  706.84   22.03
  -4  -4   5  344.63   26.74
   4   4  -5  283.57   27.37
   4   4  -5  373.23   28.47
   4   4  -5  350.17   26.52
  -4  -4   6  318.29   24.73
   4   4  -6  317.90   23.40
   4   4  -6  332.69   24.63
   4   4  -6  345.84   26.18
  -4  -4   7  332.24   15.83
   4   4  -7  314.10   11.51
   4   4  -7  333.55   12.53
   4   4  -7  353.53   15.48
  -4  -4   8   14.79    6.15
   4   4  -8    6.00    1.27
   4   4  -8    5.74    1.46
   4   4  -8   12.43    4.64
  -4  -4   8   14.82    7.29
  -4  -4   9   90.54   21.44
   4   4  -9   73.68   17.52
  -4  -4   9   90.41   21.04
  -4  -4  10   13.16    6.60
   4   4 -10   13.74    6.43
  -4  -4  11   40.56    9.85
   4   4 -11   31.87    8.61
  -4  -4  11   36.82    9.37
  -4  -4  12   42.27   10.30
   4   4 -12   41.88    9.51
  -4  -4  12   28.40    9.45
  -4  -4  13   19.60    8.24
   4   4 -13   15.50    5.11
  -4  -4  13    7.35    6.78
  -4  -4  14    8.36    4.49
   4   4 -14    9.66    4.84
  -4  -4  14    9.58    6.52
  -4  -3  -7    1.59    4.17
   4   3   7   31.07   11.62
  -4  -3  -6   34.61    9.03
   4   3   6   29.88    9.16
  -4  -3  -5   44.58   11.54
  -4  -3  -5   71.68   19.17
   4   3   5  112.74   21.17
  -4  -3  -4    2.91    1.51
  -4  -3  -4    2.87    2.69
   4   3   4   17.14   10.51
   4   3   4    4.39    1.71
  -4  -3  -3  301.69   15.76
  -4  -3  -3  317.10   38.05
   4   3   3  304.95   20.40
   4   3   3  259.28   13.58
   4   3   3  300.22   15.04
  -4  -3  -2  298.30   22.48
  -4  -3  -2  315.95   26.09
   4   3   2  255.84   22.29
   4   3   2  262.62   19.31
  -4  -3  -2  293.48   21.60
  -4  -3  -1  536.71   19.91
  -4  -3  -1  522.81   26.33
   4   3   1  590.32   24.41
   4   3   1  555.49   19.31
  -4  -3  -1  497.51   17.32
  -4  -3   0  886.61   28.03
  -4  -3   0  827.22   28.32
   4   3   0  955.13   32.33
   4   3   0  860.37   26.13
  -4  -3   0  875.58   26.20
  -4  -3   1  653.32   19.79
  -4  -3   1  652.85   19.77
   4   3  -1  525.79   31.78
   4   3  -1  506.71   28.84
  -4  -3   1  615.74   16.55
  -4  -3   2  374.80   22.71
  -4  -3   2  339.76   20.78
   4   3  -2  376.67   24.15
   4   3  -2  439.83   26.16
  -4  -3   2  317.26   18.24
  -4  -3   3  905.27   25.92
  -4  -3   3  934.03   25.89
   4   3  -3  804.97   22.32
   4   3  -3  945.31   28.10
   4   3  -3  850.53   23.65
  -4  -3   3  820.08   22.21
  -4  -3   4 2387.29   63.50
  -4  -3   4 2410.71   62.75
   4   3  -4 2155.99   56.10
   4   3  -4 2248.63   58.91
  -4  -3   4 2164.81   56.45
  -4  -3   5  992.74   28.67
  -4  -3   5  946.71   25.31
   4   3  -5 1013.45   26.96
   4   3  -5 1121.15   31.52
   4   3  -5 1024.20   30.15
  -4  -3   6 1255.28   40.13
   4   3  -6 1157.59   34.53
   4   3  -6 1189.06   35.53
   4   3  -6 1226.87   38.62
   4   3  -6 1241.88   38.97
  -4  -3   7  618.30   24.24
   4   3  -7  711.27   24.23
   4   3  -7  730.80   24.91
   4   3  -7  751.72   27.96
   4   3  -7  728.45   27.22
  -4  -3   8  469.63   22.66
   4   3  -8  389.46   29.81
   4   3  -8  390.98   30.44
  -4  -3   9  354.78   17.83
   4   3  -9  364.88   16.17
  -4  -3   9  405.59   19.31
  -4  -3  10    9.90    6.36
   4   3 -10   15.33    5.39
  -4  -3  10   33.59   11.45
  -4  -3  11  138.75   17.04
   4   3 -11  157.50   11.60
  -4  -3  11  169.43   14.42
  -4  -3  12  241.30   16.93
   4   3 -12  227.63   19.29
  -4  -3  12  261.47   18.80
  -4  -3  13  170.49   14.62
   4   3 -13  140.91   29.43
  -4  -3  13  160.14   14.86
   4   3 -14   15.05    5.18
  -4  -3  14   34.31    9.51
  -4  -2  -8   19.98    6.07
   4   2   8   37.74    9.21
  -4  -2  -7   86.94   25.49
   4   2   7   92.18   11.99
  -4  -2  -6  222.54   25.83
   4   2   6  213.29   14.42
   4   2   6  199.55    8.76
  -4  -2  -5  690.59   41.50
  -4  -2  -5  804.49  148.98
   4   2   5  719.67  133.36
   4   2   5  615.90   37.23
  -4  -2  -4  485.72   24.29
   4   2   4  404.73   20.60
  -4  -2  -4  517.14   27.46
   4   2   4  424.85   24.05
   4   2   4  460.75   23.28
  -4  -2  -4  454.50   22.87
  -4  -2  -3   49.80    5.60
   4   2   3   60.14    6.33
  -4  -2  -3   55.28   10.45
   4   2   3   73.02   11.03
   4   2   3   72.81    7.69
  -4  -2  -3   43.69    4.67
  -4  -2  -2   31.03    4.19
   4   2   2   28.19    3.39
  -4  -2  -2   38.93    5.86
   4   2   2   18.16    6.95
   4   2   2   31.10    3.73
  -4  -2  -2   27.15    3.23
  -4  -2  -1  474.17   34.85
   4   2   1  400.61   29.44
  -4  -2  -1  446.67   34.96
   4   2   1  486.06   41.27
   4   2   1  465.06   33.86
  -4  -2  -1  434.95   31.58
  -4  -2   0  575.61   42.18
   4   2   0  469.39   26.89
  -4  -2   0  568.20   42.08
   4   2   0  550.53   32.58
   4   2   0  547.89   30.92
  -4  -2   0  523.69   29.54
  -4  -2   1  662.59   19.21
   4   2  -1  687.80   19.60
  -4  -2   1  609.72   18.70
   4   2  -1  798.47   25.07
   4   2  -1  798.83   21.74
  -4  -2   1  619.31   17.00
  -4  -2   2 4069.38   76.45
  -4  -2   2 4025.36   75.67
   4   2  -2 3878.23   72.56
   4   2  -2 4172.65   77.55
  -4  -2   2 3769.76   69.75
  -4  -2   3 3078.27   58.00
   4   2  -3 2874.45   54.01
   4   2  -3 2951.55   56.85
   4   2  -3 3013.12   56.79
  -4  -2   3 2823.87   53.00
  -4  -2   4 3996.75  286.96
  -4  -2   4 3948.50  283.21
   4   2  -4 3767.96   96.62
   4   2  -4 3979.62  285.60
   4   2  -4 3878.39  100.30
  -4  -2   4 3594.24   92.72
  -4  -2   5  368.91   22.77
  -4  -2   5  386.27   22.45
   4   2  -5  354.84   20.10
   4   2  -5  367.34   21.83
   4   2  -5  346.63   20.67
  -4  -2   6  584.75   20.97
   4   2  -6  593.42   17.77
   4   2  -6  629.35   21.24
   4   2  -6  605.94   20.71
  -4  -2   7  346.89   16.49
   4   2  -7  328.49   14.15
   4   2  -7  296.38   13.22
  -4  -2   8  761.93   33.27
   4   2  -8  759.16   31.21
   4   2  -8  813.68   33.83
  -4  -2   9  177.32   25.50
   4   2  -9  245.83   36.06
   4   2  -9  251.52   37.46
  -4  -2  10  138.60   16.42
   4   2 -10  106.48   12.89
  -4  -2  10  119.17   15.50
  -4  -2  11  275.57   18.40
   4   2 -11  279.24   17.33
  -4  -2  11  313.56   24.48
  -4  -2  12   69.21   14.07
   4   2 -12   52.39   12.45
  -4  -2  12   84.68   11.77
  -4  -2  13   53.52   10.75
   4   2 -13   17.27    8.86
  -4  -2  13   47.27   10.99
  -4  -1  -9    3.91    2.13
   4   1   9   10.76    6.75
  -4  -1  -8    6.83    3.22
   4   1   8   15.52    9.41
   4   1   8   -0.44    2.55
  -4  -1  -7   13.67    3.72
   4   1   7    8.34   10.42
   4   1   7   17.72    5.96
  -4  -1  -6   11.24    3.86
   4   1   6   38.36   11.98
   4   1   6   41.16    8.95
  -4  -1  -5   54.76    9.27
   4   1   5   42.69    6.65
  -4  -1  -5   68.17   12.79
   4   1   5   35.61    9.49
   4   1   5   40.29    7.18
  -4  -1  -4  103.71   10.53
   4   1   4  168.56   16.84
  -4  -1  -4  118.13   19.43
   4   1   4  176.86   19.61
   4   1   4  166.57   17.00
  -4  -1  -4  102.39   10.91
  -4  -1  -3  289.76   11.12
   4   1   3  318.54   12.40
   4   1   3  316.28   14.78
   4   1   3  315.57   12.81
  -4  -1  -3  276.15   11.16
  -4  -1  -2  240.13   18.08
   4   1   2  205.66   15.46
  -4  -1  -2  278.36   25.28
   4   1   2  235.89   19.74
   4   1   2  212.86   16.20
  -4  -1  -2  207.97   15.83
  -4  -1  -1   20.94    2.84
   4   1   1   13.77    2.86
  -4  -1  -1   34.06    5.91
   4   1   1    3.40    6.41
  -4  -1  -1   15.53    2.56
  -4  -1   0   85.23    6.71
   4   1   0   47.48    4.54
  -4  -1   0   75.84    7.81
   4   1   0   51.17    5.80
   4   1   0   59.58    4.75
  -4  -1   0   63.04    4.50
  -4  -1   1 2093.32   40.79
   4   1  -1 2042.13   39.43
   4   1  -1 1914.70   37.02
   4   1  -1 2200.21   43.28
  -4  -1   1 1977.92   37.48
  -4  -1   2  421.48   21.08
   4   1  -2  236.51   12.18
  -4  -1   2  383.13   19.07
   4   1  -2  243.94   12.27
   4   1  -2  270.29   15.24
   4   1  -2  272.23   14.13
  -4  -1   2  363.05   17.77
   4   1  -3 1024.95   21.46
  -4  -1   3 1079.71   21.65
   4   1  -3 1075.07   21.27
   4   1  -3 1150.95   23.91
  -4  -1   3 1071.68   22.07
  -4  -1   3 1025.16   20.76
  -4  -1   4 1389.85   29.42
  -4  -1   4 1340.26   25.98
   4   1  -4 1378.25   26.33
   4   1  -4 1469.63   29.54
  -4  -1   4 1311.30   26.71
   4   1  -4 1260.62   25.85
  -4  -1   5   91.91    7.80
  -4  -1   5   97.05    8.85
   4   1  -5   39.88    3.11
   4   1  -5   35.04    4.61
  -4  -1   5   93.77    6.73
   4   1  -5   46.88    8.76
  -4  -1   6  176.72   15.01
  -4  -1   6  170.21   12.39
   4   1  -6  192.15   13.92
   4   1  -6  217.07   16.95
   4   1  -6  188.14   21.31
  -4  -1   7   35.10    6.79
   4   1  -7   28.01    4.43
   4   1  -7   26.81    4.92
  -4  -1   8  164.81   16.34
   4   1  -8  180.98   14.87
   4   1  -8  178.58   15.01
  -4  -1   9   81.30   18.82
   4   1  -9   52.08   12.02
   4   1  -9   61.35   14.45
  -4  -1  10  184.10   35.43
   4   1 -10  181.94   38.86
   4   1 -10  163.28   16.25
  -4  -1  11  127.51   10.21
   4   1 -11  120.52   22.35
  -4  -1  11  115.13   24.04
  -4  -1  12   13.39    5.79
   4   1 -12   24.85    8.93
  -4  -1  12   22.86    7.55
  -4  -1  13   45.71   10.91
   4   1 -13   34.55   10.31
  -4  -1  13   47.15   13.02
  -4   0  -9   40.05   14.10
   4   0   9   66.72   11.39
   4   0   9   70.07    9.68
  -4   0  -8   52.05   11.71
   4   0   8   66.16   13.52
   4   0   8   55.58    9.15
  -4   0  -7   31.47    8.93
   4   0   7   33.33    9.38
   4   0   7   44.39    8.08
  -4   0  -6   20.23    4.52
   4   0   6   40.82   12.41
   4   0   6   21.30    5.02
  -4   0  -5    7.22    3.40
   4   0   5  -14.72    7.58
   4   0   5    9.95    3.72
  -4   0  -4  393.30   28.65
   4   0   4  439.18   17.55
  -4   0  -4  408.94   40.62
   4   0   4  455.78   21.65
   4   0   4  449.37   19.87
  -4   0  -3 1073.90   32.10
   4   0   3  890.49   26.90
   4   0   3  967.09   32.31
   4   0   3  941.16   29.45
  -4   0  -3  977.19   30.12
  -4   0  -2 1626.28   42.42
   4   0   2 1489.36   39.03
  -4   0  -2 1563.99   42.51
   4   0   2 1635.63   44.62
   4   0   2 1605.89   42.65
  -4   0  -2 1616.28   42.57
  -4   0  -1 3771.76   96.86
   4   0   1 3459.13   88.98
  -4   0  -1 3843.20   99.72
   4   0   1 3610.90   93.09
  -4   0  -1 3556.66   91.47
  -4   0   0  161.01    9.30
   4   0   0  128.20    7.59
  -4   0   0  183.30   10.39
   4   0   0  140.47    8.30
  -4   0   0  146.68    8.18
  -4   0   1  416.15   21.02
   4   0  -1  368.86   18.12
   4   0  -1  406.72   19.85
   4   0  -1  419.66   21.29
  -4   0   1  376.72   18.48
   4   0  -1  430.69   21.18
  -4   0   1  398.22   19.41
  -4   0   2   89.15    7.12
   4   0  -2  112.32    6.53
   4   0  -2  115.01    7.83
  -4   0   2   88.27    6.11
   4   0  -2  112.75    6.99
  -4   0   2   75.28    5.10
  -4   0   3  654.27   36.98
   4   0  -3  622.48   29.48
   4   0  -3  663.51   37.70
  -4   0   3  621.19   29.61
   4   0  -3  691.69   39.48
  -4   0   4  368.35   19.39
  -4   0   4  356.58   17.25
   4   0  -4  346.00   19.78
   4   0  -4  368.83   18.46
  -4   0   4  363.63   18.01
   4   0  -4  381.78   19.31
  -4   0   5  736.65   22.69
  -4   0   5  743.16   19.81
   4   0  -5  701.90   18.74
   4   0  -5  733.05   20.61
  -4   0   5  706.49   19.78
   4   0  -5  718.44   21.27
  -4   0   6 1766.82   54.77
  -4   0   6 1642.80   48.41
   4   0  -6 1730.08   50.89
   4   0  -6 1724.12   51.74
  -4   0   6 1621.23   48.87
   4   0  -6 1762.82   54.00
  -4   0   7  590.55   23.53
  -4   0   7  582.17   19.84
  -4   0   7  571.79   19.52
   4   0  -7  550.52   20.30
  -4   0   8  107.67   13.20
   4   0  -8  114.52   12.37
   4   0  -8  118.84   18.37
  -4   0   9   47.18    9.75
   4   0  -9   46.54   10.33
   4   0  -9   48.88    8.99
  -4   0  10  155.99   14.90
   4   0 -10  150.24   16.76
   4   0 -10  173.47   13.54
  -4   0  11   34.23    9.55
   4   0 -11   18.31    6.48
  -4   0  11   52.65   13.60
  -4   0  12   33.22    8.69
   4   0 -12   19.56    7.96
  -4   0  12    9.07    7.73
  -4   0  13    9.21    5.24
   4   0 -13   -3.57    2.48
  -4   0  13    6.53    5.34
  -4   1 -10   10.54    3.71
   4  -1  10   44.57   10.66
   4  -1  10   41.94    8.26
  -4   1  -9    4.71    4.49
   4  -1   9   21.57   10.62
   4  -1   9   21.56    7.19
  -4   1  -8   29.88    8.79
   4  -1   8   41.02   10.92
   4  -1   8   45.82   10.01
  -4   1  -7  103.95   18.88
   4  -1   7   75.90   12.43
   4  -1   7  112.54   13.84
  -4   1  -6  158.23   17.73
   4  -1   6  131.28   16.26
   4  -1   6  155.20   17.54
  -4   1  -5   64.44    9.78
   4  -1   5   17.30    9.36
   4  -1   5   19.09    4.67
  -4   1  -4   91.42    7.97
  -4   1  -4   88.87    7.34
  -4   1  -4   94.36   10.74
   4  -1   4   88.83   10.19
   4  -1   4   92.61    9.89
  -4   1  -3  318.10   23.16
   4  -1   3  339.53   25.69
  -4   1  -2   90.58    6.40
   4  -1   2   34.40    3.42
  -4   1  -2   96.05    8.13
   4  -1   2   40.76    6.53
   4  -1   2   35.99    4.96
  -4   1  -2   99.90    7.90
  -4   1  -1 1046.96   21.11
   4  -1   1 1067.32   21.46
  -4   1  -1 1091.38   23.47
   4  -1   1 1137.32   24.14
   4  -1   1 1118.41   23.23
  -4   1  -1  965.11   19.81
  -4   1   0  887.81   19.08
   4  -1   0  834.78   17.59
  -4   1   0  869.52   19.30
   4  -1   0  849.22   18.36
  -4   1   0  837.47   17.66
  -4   1   0  803.93   17.31
  -4   1   1 2603.72   49.95
   4  -1  -1 2360.44   44.99
   4  -1  -1 2367.54   45.05
   4  -1  -1 2490.07   47.23
  -4   1   1 2523.30   47.59
   4  -1  -1 2566.88   49.08
  -4   1   1 2379.16   45.14
   4  -1  -2  277.44   14.46
  -4   1   2  309.62   15.74
   4  -1  -2  278.95   14.07
   4  -1  -2  323.64   16.36
  -4   1   2  298.61   14.69
   4  -1  -2  320.71   16.81
  -4   1   2  293.43   14.69
  -4   1   3   36.75    4.96
  -4   1   3   32.68    3.77
   4  -1  -3   43.27    3.72
   4  -1  -3   34.20    3.35
  -4   1   3   36.84    3.45
   4  -1  -3   47.91    5.76
  -4   1   4  104.24   10.90
  -4   1   4   98.11    6.74
   4  -1  -4   56.22    4.36
   4  -1  -4   57.00    4.43
  -4   1   4   96.51    6.41
   4  -1  -4   60.69    7.63
  -4   1   5 1095.04   35.26
  -4   1   5 1100.69   33.23
   4  -1  -5 1133.36   33.94
   4  -1  -5 1141.74   34.40
  -4   1   5 1064.11   32.34
   4  -1  -5 1186.12   37.16
  -4   1   6  298.70   14.22
  -4   1   6  316.37   11.88
   4  -1  -6  232.69   19.29
   4  -1  -6  262.37   24.69
  -4   1   6  284.03   11.19
   4  -1  -6  254.65   31.16
  -4   1   7  369.97   29.58
  -4   1   7  316.51   23.67
  -4   1   7  323.04   23.86
   4  -1  -7  346.66   26.61
  -4   1   7  305.13   22.90
   4  -1  -7  364.81   28.19
  -4   1   8  200.14   29.35
  -4   1   8  170.26   23.11
  -4   1   8  171.17   23.32
   4  -1  -8  220.52   30.37
   4  -1  -8  271.35   28.68
  -4   1   9  148.26   15.31
  -4   1   9  150.20   12.52
   4  -1  -9  138.75   16.38
   4  -1  -9  140.62   13.94
  -4   1  10   36.67   10.35
   4  -1 -10   40.43    9.72
   4  -1 -10   42.03    8.57
  -4   1  11   13.52    7.70
   4  -1 -11   -0.78    2.21
  -4   1  12   20.01    6.94
   4  -1 -12   24.38    7.38
  -4   1  12   39.34   11.28
  -4   2 -10    1.30    2.46
   4  -2  10   21.62    7.63
   4  -2  10   13.95    7.43
  -4   2  -9    7.68    3.46
   4  -2   9   12.29    9.55
   4  -2   9    4.76    4.20
  -4   2  -8  120.48    8.50
   4  -2   8  117.23   22.40
   4  -2   8  105.02   15.38
  -4   2  -7   39.19    9.16
   4  -2   7   53.76   13.12
   4  -2   7   76.89    9.12
  -4   2  -6  289.09   17.16
   4  -2   6  269.78   16.47
   4  -2   6  289.78   17.99
  -4   2  -5  447.98   20.53
   4  -2   5  506.55   22.86
  -4   2  -4  277.89    9.67
  -4   2  -4  292.59   10.21
  -4   2  -4  265.72   25.77
   4  -2   4  237.30   21.17
   4  -2   4  232.03   20.71
  -4   2  -3   58.52    7.35
  -4   2  -3   57.64    5.00
  -4   2  -3   68.73    8.28
   4  -2   3   56.13    7.15
   4  -2   3   56.42    7.09
  -4   2  -2   81.33    8.51
  -4   2  -2   86.51    6.46
  -4   2  -2   84.26    7.37
   4  -2   2   72.94    6.72
   4  -2   2   62.10    6.08
  -4   2  -1  844.40   22.74
  -4   2  -1  885.22   24.24
  -4   2  -1  916.06   25.94
   4  -2   1  988.25   26.71
   4  -2   1 1017.93   28.32
   4  -2   1  994.82   27.98
  -4   2   0 1315.41   25.89
  -4   2   0 1354.05   27.50
  -4   2   0 1379.02   28.08
   4  -2   0 1263.58   24.63
   4  -2   0 1289.88   25.65
   4  -2   0 1172.36   24.49
  -4   2   1 1029.55   20.98
  -4   2   1 1129.28   24.03
   4  -2  -1 1044.86   21.59
   4  -2  -1 1069.25   21.42
  -4   2   1 1115.62   21.93
   4  -2  -1 1141.13   24.12
  -4   2   2 1188.55   25.52
  -4   2   2 1209.06   24.77
   4  -2  -2 1259.62   25.05
   4  -2  -2 1352.78   26.19
  -4   2   2 1178.19   22.78
   4  -2  -2 1407.27   28.64
  -4   2   3 1016.02   29.04
  -4   2   3 1037.08   28.18
   4  -2  -3  897.57   24.45
   4  -2  -3  976.04   25.65
  -4   2   3  981.48   25.85
   4  -2  -3 1050.98   29.25
  -4   2   4  233.94   16.28
  -4   2   4  229.93   14.43
   4  -2  -4  235.81   14.30
   4  -2  -4  227.89   13.15
  -4   2   4  202.63   11.95
   4  -2  -4  261.79   16.51
  -4   2   5   47.84    9.32
  -4   2   5   25.22    3.85
   4  -2  -5   13.75    2.57
   4  -2  -5   22.39    2.60
  -4   2   5   32.84    3.45
   4  -2  -5   40.41    5.51
  -4   2   6  164.39   15.09
  -4   2   6  172.57   13.88
   4  -2  -6  124.81   13.43
  -4   2   6  150.50   11.69
   4  -2  -6  134.41   22.30
  -4   2   7  187.41   20.29
  -4   2   7  173.08   17.24
  -4   2   7  167.33   16.91
   4  -2  -7  224.83   10.09
  -4   2   7  165.70   16.56
   4  -2  -7  211.14   13.86
  -4   2   8  539.33   23.47
  -4   2   8  448.81   15.91
   4  -2  -8  466.82   16.70
   4  -2  -8  502.89   20.23
  -4   2   9  156.14   13.20
  -4   2   9  141.73    9.23
   4  -2  -9  126.13   14.72
   4  -2  -9  179.38   12.70
  -4   2  10   61.35   13.22
   4  -2 -10   73.47    7.95
  -4   2  11   62.96   10.67
   4  -2 -11   23.52    8.09
  -4   3 -10   48.32   17.71
   4  -3  10   83.95   11.76
  -4   3  -9    0.42    3.49
   4  -3   9   18.64    6.77
   4  -3   9    5.96    4.77
  -4   3  -8   30.32    6.96
   4  -3   8   27.91    8.10
   4  -3   8   19.29    5.30
  -4   3  -7  104.36   11.22
   4  -3   7   59.82   13.36
  -4   3  -6  461.18   24.97
   4  -3   6  490.63   27.00
  -4   3  -5  746.58   31.45
   4  -3   5  661.34   28.87
  -4   3  -4  165.14   13.61
  -4   3  -4  173.21   14.56
  -4   3  -4  182.31   16.47
   4  -3   4  248.13   21.87
   4  -3   4  256.34   22.36
  -4   3  -3 1382.16   41.29
  -4   3  -3 1457.21   43.65
  -4   3  -3 1349.83   42.27
   4  -3   3 1512.67   46.56
   4  -3   3 1564.10   48.51
  -4   3  -2  188.69   11.13
  -4   3  -2  208.13   13.05
  -4   3  -2  193.22   12.91
   4  -3   2  110.14   13.87
   4  -3   2  134.19    9.81
   4  -3   2  138.74   10.11
  -4   3  -1  383.32   21.88
  -4   3  -1  427.84   25.11
  -4   3  -1  454.71   27.03
   4  -3   1  375.41   28.12
   4  -3   1  405.10   23.49
   4  -3   1  418.85   24.94
  -4   3   0  473.07   27.22
  -4   3   0  522.18   30.54
   4  -3   0  491.74   31.40
   4  -3   0  493.16   28.12
   4  -3   0  489.17   28.83
  -4   3   1  487.12   28.82
  -4   3   1  488.82   29.20
   4  -3  -1  530.79   29.76
   4  -3  -1  551.69   31.12
   4  -3  -1  565.32   41.78
  -4   3   2 1047.19   29.00
   4  -3  -2 1107.08   28.62
   4  -3  -2 1099.34   28.57
  -4   3   3 1873.88   57.40
  -4   3   3 1833.70   55.42
   4  -3  -3 1729.60   51.99
   4  -3  -3 1791.57   52.49
   4  -3  -3 1892.26   57.43
  -4   3   4  635.82   22.29
  -4   3   4  653.44   21.77
   4  -3  -4  581.50   18.55
   4  -3  -4  639.16   18.93
  -4   3   4  597.14   17.83
   4  -3  -4  659.76   22.34
  -4   3   5  304.68   25.20
  -4   3   5  294.74   22.54
   4  -3  -5  252.89   19.35
   4  -3  -5  286.03   20.93
  -4   3   5  297.69   21.84
   4  -3  -5  267.32   20.68
  -4   3   6  150.25   17.99
  -4   3   6  129.03   13.77
   4  -3  -6  149.06   15.67
  -4   3   6  130.06   13.03
   4  -3  -6  138.13   21.80
  -4   3   7   22.28    7.76
  -4   3   7    4.73    3.16
   4  -3  -7    4.83    1.88
  -4   3   7    3.71    2.25
   4  -3  -7    3.75    2.24
  -4   3   8  203.60   13.96
  -4   3   8  177.60   10.74
   4  -3  -8  154.89    8.93
   4  -3  -8  148.45   21.91
  -4   3   9   28.74    9.56
  -4   3   9   16.98    4.25
   4  -3  -9   10.67    5.33
  -4   3  10   11.16    6.19
   4  -3 -10    4.83    4.14
  -4   3  11   83.03   10.03
  -4   4 -10   53.09    9.05
   4  -4  10   39.51   10.32
   4  -4  10   51.42    8.56
  -4   4  -9   50.33   10.01
  -4   4  -9   39.92    8.30
   4  -4   9   93.18   11.33
  -4   4  -8  130.65   11.59
  -4   4  -8  128.78   10.80
   4  -4   8  137.26   11.44
  -4   4  -7   86.58   10.26
  -4   4  -7  106.37   11.28
   4  -4   7  115.82   13.11
  -4   4  -6   69.95   16.17
  -4   4  -6   67.74   16.37
   4  -4   6   46.53   12.32
  -4   4  -5  227.50   16.79
  -4   4  -5  216.51   16.15
  -4   4  -5  266.05   21.30
  -4   4  -5  231.06   18.57
   4  -4   5  226.61   18.75
  -4   4  -4 1609.54   54.93
  -4   4  -4 1757.34   60.24
  -4   4  -4 1756.92   61.60
  -4   4  -4 1781.90   62.17
   4  -4   4 1887.41   66.49
  -4   4  -3  719.40   22.19
  -4   4  -3  806.77   25.53
  -4   4  -3  777.57   26.40
  -4   4  -3  831.26   26.72
   4  -4   3  676.93   23.74
  -4   4  -2 1469.13   44.11
  -4   4  -2 1600.77   48.57
  -4   4  -2 1394.08   43.25
   4  -4   2 1514.77   45.51
   4  -4   2 1684.97   50.86
   4  -4   2 1697.47   52.36
  -4   4  -1 1222.59   33.67
  -4   4  -1 1353.71   37.24
   4  -4   1 1279.91   33.75
   4  -4   1 1375.21   36.68
   4  -4   1 1388.67   38.30
  -4   4   0  307.58   18.89
   4  -4   0  265.05   16.33
   4  -4   0  267.05   15.72
   4  -4   0  259.86   16.19
  -4   4   1   34.34    5.47
   4  -4  -1   51.85    4.11
   4  -4  -1   39.90    3.55
   4  -4  -1   51.03    5.92
  -4   4   2   65.14    7.93
   4  -4  -2   61.54    7.30
  -4   4   3  421.76   18.77
  -4   4   3  397.53   16.37
   4  -4  -3  422.96   16.74
  -4   4   4  685.05   29.71
  -4   4   4  683.87   28.49
   4  -4  -4  671.47   27.97
  -4   4   5  497.79   23.52
  -4   4   5  499.22   20.60
   4  -4  -5  505.99   25.38
  -4   4   6  328.40   16.67
  -4   4   6  322.43   14.17
  -4   4   6  263.91    8.58
  -4   4   6  285.01    9.26
   4  -4  -6  285.44   18.33
  -4   4   7  142.34   22.10
  -4   4   7  168.98   11.43
   4  -4  -7  170.93   11.83
  -4   4   8   14.95    6.96
  -4   4   8   23.96    6.39
   4  -4  -8   13.58    3.24
  -4   4   9   15.64    6.42
  -4   4   9    6.98    3.14
   4  -4  -9   15.51    6.51
  -4   4  10   20.68    9.19
  -4   5 -11   12.19    5.16
  -4   5 -11   12.43    6.23
   4  -5  11   17.76    8.91
  -4   5 -10   28.93    9.77
  -4   5 -10   24.99    9.27
   4  -5  10   28.83   10.47
  -4   5  -9   47.02   10.04
  -4   5  -9   43.18    9.42
   4  -5   9   62.29   14.88
  -4   5  -8   98.14   15.53
  -4   5  -8  141.39   12.79
   4  -5   8  122.05   11.37
  -4   5  -7  209.33   15.36
  -4   5  -7  208.22   15.11
   4  -5   7  187.05   14.33
  -4   5  -6 1042.59   50.35
  -4   5  -6 1109.16  158.63
  -4   5  -6 1166.04  167.42
  -4   5  -6 1142.78  164.08
   4  -5   6 1078.70   54.11
  -4   5  -5  425.70   16.38
  -4   5  -5  424.66   16.64
  -4   5  -5  456.74   20.55
  -4   5  -5  455.68   19.41
   4  -5   5  403.57   18.32
  -4   5  -4   24.12    3.14
  -4   5  -4   25.48    5.69
  -4   5  -4   22.75    4.19
   4  -5   4   14.81    5.79
   4  -5   3   23.59    3.40
  -4   5  -3   27.11    3.34
  -4   5  -3   19.14    4.00
  -4   5  -3   25.85    4.19
   4  -5   3   36.53    6.30
   4  -5   2  856.73   30.70
  -4   5  -2  776.19   29.31
  -4   5  -2  772.53   27.52
   4  -5   2  814.04   28.67
   4  -5   2  861.44   31.98
   4  -5   1  682.16   22.33
  -4   5  -1  790.61   26.45
   4  -5   1  623.48   19.35
   4  -5   1  666.13   21.09
   4  -5   1  673.64   23.02
   4  -5   0  243.03   20.86
  -4   5   0  167.14   16.32
   4  -5   0  221.69   18.22
   4  -5   0  236.39   19.52
   4  -5   0  232.30   20.08
   4  -5  -1  731.05   27.38
  -4   5   1  656.84   25.27
   4  -5  -1  706.52   26.83
   4  -5  -2 1242.26   50.08
  -4   5   2 1176.77   47.39
   4  -5  -2 1183.84   47.31
   4  -5  -3  596.51   25.77
  -4   5   3  598.12   25.88
   4  -5  -3  639.28   27.15
  -4   5   4  307.84   19.37
  -4   5   4  293.02   17.36
   4  -5  -4  323.38   17.89
  -4   5   5  145.75   17.75
  -4   5   5  115.13   14.19
   4  -5  -5   92.70   16.95
  -4   5   6  109.95   14.18
  -4   5   6   95.55   11.44
   4  -5  -6  132.45   22.69
  -4   5   7   75.72   11.84
  -4   5   7   83.54   11.85
   4  -5  -7   71.89   18.39
  -4   5   8   37.50   10.33
  -4   5   8   28.27    7.78
   4  -5  -8   13.87    5.09
  -4   5   9   13.41    6.43
   4  -5  -9    2.47    3.33
  -4   6 -11   35.46    6.23
  -4   6 -11   51.24    9.00
   4  -6  11   40.46    9.26
  -4   6 -10    3.34    3.79
  -4   6 -10   19.70    8.88
   4  -6  10    2.63    6.20
  -4   6  -9   48.28    9.06
  -4   6  -9   40.16    7.15
   4  -6   9   67.17   14.87
  -4   6  -8  202.41   11.53
  -4   6  -8  208.38   32.23
   4  -6   8  170.85   11.41
  -4   6  -7  229.10   12.17
  -4   6  -7  234.93   14.69
  -4   6  -7  246.71   30.97
   4  -6   7  323.00   21.02
  -4   6  -6  205.03   22.71
  -4   6  -6  209.36   27.56
   4  -6   6  137.74   17.36
   4  -6   5  401.13   20.56
  -4   6  -5  214.99   29.34
  -4   6  -5  240.30   33.76
  -4   6  -5  282.32   30.43
   4  -6   5  430.35   24.42
   4  -6   4  178.81   21.06
  -4   6  -4  178.86   19.26
  -4   6  -4  204.19   17.08
   4  -6   4  175.60   20.10
   4  -6   3   13.56    2.91
  -4   6  -3   15.19    5.24
  -4   6  -3   15.47    5.41
   4  -6   2   43.33   10.66
  -4   6  -2   67.59    8.61
  -4   6  -2   56.98    6.35
   4  -6   2   43.55    4.85
   4  -6   2   53.31    7.79
   4  -6   1  227.12   19.57
  -4   6  -1  152.94   14.53
   4  -6   1  178.62   13.50
   4  -6   1  198.22   15.16
   4  -6   1  214.95   17.66
   4  -6   0  660.83   28.02
  -4   6   0  685.41   29.76
   4  -6   0  661.93   25.78
   4  -6   0  663.94   25.88
   4  -6   0  672.02   27.95
   4  -6  -1  910.94   35.44
  -4   6   1  947.18   37.37
   4  -6  -1  923.12   35.56
   4  -6  -2  241.77   13.37
  -4   6   2  188.47   20.83
   4  -6  -2  241.15   12.12
   4  -6  -3   25.91    7.81
  -4   6   3   79.03   18.70
   4  -6  -3   30.53    8.21
  -4   6   4    6.58    5.17
   4  -6  -4   -2.09    3.29
  -4   6   5   35.75    9.99
  -4   6   5   35.26    8.97
   4  -6  -5   36.32   11.21
  -4   6   6    9.39    6.18
  -4   6   6    8.95    5.91
   4  -6  -6   -0.03    3.25
  -4   6   7   34.44    9.68
  -4   6   7   34.29    9.43
   4  -6  -7   29.85    8.80
  -4   6   8   80.89   11.36
  -4   6   8   73.89    8.22
   4  -6  -8   38.80   14.39
  -4   7 -10   69.17   10.20
  -4   7 -10   67.75    9.67
   4  -7  10   84.11   13.05
  -4   7  -9   67.06    7.57
  -4   7  -9   64.56    8.30
   4  -7   9   61.49    9.73
  -4   7  -8   19.15    6.82
  -4   7  -8   10.55    3.95
   4  -7   8   28.04    9.68
   4  -7   7   67.05   10.00
  -4   7  -7  115.31   20.39
  -4   7  -7   84.76   17.34
   4  -7   7   80.89   15.42
   4  -7   6  156.65   13.82
  -4   7  -6  146.97   14.46
  -4   7  -6  112.78   20.19
   4  -7   6  150.45   15.93
   4  -7   5  817.77   28.77
  -4   7  -5  883.51   32.61
  -4   7  -5  902.09   36.01
   4  -7   4  705.47   35.66
  -4   7  -4  753.84   38.71
  -4   7  -4  743.68   37.10
   4  -7   4  701.09   36.13
   4  -7   3  746.56   38.43
  -4   7  -3  767.25   39.35
  -4   7  -3  787.29   38.98
   4  -7   3  797.72   41.08
   4  -7   2  390.39   30.73
  -4   7  -2  325.80   19.91
  -4   7  -2  320.69   16.57
   4  -7   2  303.54   15.66
   4  -7   2  340.36   19.04
   4  -7   1   97.80   20.15
  -4   7  -1  111.80   18.45
   4  -7   1   72.03   15.43
   4  -7   1   96.08   16.60
   4  -7   0   45.69   11.85
  -4   7   0   43.77   11.82
   4  -7   0   29.90    7.84
   4  -7  -1  220.36   36.86
  -4   7   1  173.73   19.49
   4  -7  -1  199.60   21.87
   4  -7  -2  179.57   20.19
  -4   7   2  183.72   21.61
   4  -7  -2  208.53   22.45
   4  -7  -3  376.71   21.81
  -4   7   3  417.69   24.01
   4  -7  -3  356.90   19.93
   4  -7  -4  150.18   11.06
  -4   7   4  123.52   10.72
   4  -7  -4  148.74   14.63
  -4   7   5   77.72    8.96
   4  -7  -5   54.70   12.40
  -4   7   6   76.49   13.27
   4  -7  -6   41.10   13.44
  -4   7   7    8.33    5.50
  -4   7   7   29.55    9.07
   4  -7  -7   13.30    3.96
  -4   8 -10   21.91    7.61
  -4   8 -10   14.24    5.20
   4  -8  10    7.79    5.79
  -4   8  -9   79.10   12.68
  -4   8  -9   67.57   17.72
   4  -8   9  106.51   13.08
  -4   8  -8   21.86    7.54
  -4   8  -8   23.08    4.74
   4  -8   8   28.63    7.88
   4  -8   7  127.17    8.04
  -4   8  -7  127.07    9.80
  -4   8  -7  111.59   21.55
   4  -8   7  126.94   11.08
   4  -8   6   45.85   13.25
  -4   8  -6   56.16   10.60
  -4   8  -6   61.14   14.94
   4  -8   6   58.58   11.28
   4  -8   5  123.48   22.30
  -4   8  -5  136.75   16.23
  -4   8  -5  120.90   19.62
   4  -8   5  131.16   15.22
   4  -8   4  440.69   37.82
  -4   8  -4  403.40   27.52
   4  -8   4  420.62   28.00
   4  -8   3  428.27   27.38
  -4   8  -3  462.00   31.00
  -4   8  -3  425.16   26.96
   4  -8   3  450.44   29.59
   4  -8   2  277.77   23.83
  -4   8  -2  238.92   17.67
  -4   8  -2  238.76   14.85
   4  -8   2  300.31   20.61
   4  -8   1  284.14   25.21
  -4   8  -1  224.19   17.93
   4  -8   1  236.51   14.61
   4  -8   1  259.91   18.10
   4  -8   0   86.54   18.86
  -4   8   0   68.98    9.17
   4  -8   0   93.91   10.88
   4  -8  -1   24.89    7.37
  -4   8   1   13.63    6.23
   4  -8  -1   23.41    6.53
   4  -8  -2   39.07    9.91
  -4   8   2   20.59    6.84
   4  -8  -2   26.21    5.85
   4  -8  -3  165.47   14.54
  -4   8   3  145.81   12.16
   4  -8  -3  153.98   11.06
   4  -8  -4   90.38   12.17
  -4   8   4   91.36   11.00
   4  -8  -4   78.61   16.22
   4  -8  -5   89.30   11.06
  -4   8   5   87.47   12.32
   4  -8  -5   53.41   15.04
  -4   8   6   32.10   14.10
  -4   8   6    8.99    4.86
   4  -8  -6    5.05    2.00
  -4   9  -9  108.66   13.94
  -4   9  -9  111.68   23.11
   4  -9   9  117.95   13.99
  -4   9  -8  293.78   21.57
  -4   9  -8  310.74   28.49
   4  -9   8  285.14   22.41
   4  -9   7  226.45   15.41
  -4   9  -7  260.97   19.37
  -4   9  -7  191.83   18.90
   4  -9   7  231.33   17.92
   4  -9   6  150.49   16.98
  -4   9  -6  174.85   16.69
  -4   9  -6  131.51   22.10
   4  -9   6  205.90   16.29
   4  -9   5   75.07   14.51
  -4   9  -5   90.54   12.79
  -4   9  -5   81.98   15.89
   4  -9   5   82.75   12.72
   4  -9   4   73.70   16.52
  -4   9  -4   75.32   17.63
   4  -9   4   66.84   11.55
   4  -9   3   79.35   16.15
  -4   9  -3   85.55   13.92
  -4   9  -3   85.05   14.61
   4  -9   3  108.67   16.88
   4  -9   2  550.98   32.14
  -4   9  -2  473.61   28.74
  -4   9  -2  447.94   24.71
   4  -9   2  495.03   28.92
   4  -9   1  491.51   50.45
  -4   9  -1  581.42   26.08
   4  -9   1  454.40   26.65
   4  -9   0  229.96   23.58
  -4   9   0  216.17   13.32
   4  -9   0  229.59   12.18
   4  -9  -1  157.40   22.68
  -4   9   1  184.82   14.57
   4  -9  -1  169.41   12.61
   4  -9  -2   21.49    5.81
  -4   9   2   34.79    9.31
   4  -9  -2   24.66    5.86
   4  -9  -3    9.85    5.55
  -4   9   3   14.41    8.86
   4  -9  -3    6.20    3.25
   4  -9  -4   17.98    7.98
  -4   9   4   14.44    6.12
   4  -9  -4    8.89    3.20
  -4  10  -9   41.48    7.88
  -4  10  -9   34.58    7.91
   4 -10   9   32.79   11.27
  -4  10  -8  145.17   13.51
  -4  10  -8  166.98   20.69
   4 -10   8  124.53   11.65
   4 -10   7  349.15   22.97
  -4  10  -7  375.27   26.02
  -4  10  -7  338.60   24.26
   4 -10   7  408.66   50.37
   4 -10   6  463.95   31.19
  -4  10  -6  547.14  119.99
   4 -10   6  419.71   30.04
   4 -10   5  341.30   35.95
  -4  10  -5  319.81   23.25
  -4  10  -5  251.21   20.60
   4 -10   5  360.95   24.43
   4 -10   4  188.45   20.62
  -4  10  -4  171.86   12.75
   4 -10   4  172.52   14.79
   4 -10   3   61.42   11.16
  -4  10  -3   56.69   11.11
   4 -10   3   64.42   11.23
   4 -10   2   36.99    6.45
  -4  10  -2   23.62    6.83
   4 -10   2   42.01    8.32
   4 -10   1    7.01    5.74
  -4  10  -1   10.63    8.62
   4 -10   1   11.59    4.02
   4 -10   0  128.77   28.60
  -4  10   0  146.64   15.95
   4 -10   0  131.41   11.26
   4 -10  -1  202.34   28.81
  -4  10   1  270.87   29.09
   4 -10  -1  242.21   23.14
   4 -10  -2   96.11    9.99
  -4  10   2  139.42   13.95
   4 -10  -2  146.32   10.51
   4 -11   7    4.90    2.82
  -4  11  -7   11.49    5.74
  -4  11  -7   13.27    6.27
   4 -11   7   30.06   11.08
   4 -11   6   14.80    5.34
  -4  11  -6   20.61    9.37
   4 -11   6   27.87    9.52
   4 -11   5  142.23   34.07
  -4  11  -5  196.76   20.77
   4 -11   5  221.51   22.76
   4 -11   4  304.43   29.18
   4 -11   4  339.81   11.64
   4 -11   3  167.69   29.48
  -4  11  -3  177.13   20.11
   4 -11   3  216.25   21.68
   4 -11   2  118.14   23.68
  -4  11  -2  157.09   18.37
   4 -11   2  113.64   12.42
   4 -11   1   11.71    5.23
  -4  11  -1   23.26    9.45
   4 -11   1   20.36    5.69
   4 -11   0   38.02    8.57
  -4  11   0   28.35   11.69
   4 -11   0   21.84    7.06
  -5 -10   3   26.39    9.92
   5  10  -3   -0.20    6.23
   5  10  -3   22.12   10.79
  -5 -10   4   58.59    8.23
   5  10  -4   81.73    9.94
   5  10  -4   71.78   10.45
  -5 -10   5   10.03    4.93
   5  10  -5   30.88    9.47
   5  10  -5   20.34    7.46
  -5 -10   6   14.78    6.34
   5  10  -6   17.54    7.93
   5  10  -6   17.66    6.95
  -5 -10   7   35.05    9.14
   5  10  -7   31.82    8.70
   5  10  -7   36.00    9.23
  -5 -10   8   28.63    8.58
   5  10  -8   24.82    6.63
   5  10  -8   13.01    5.82
  -5 -10   9   12.92    6.32
   5  10  -9   27.05    7.64
   5  10  -9   20.02    6.99
  -5 -10   9   11.80    5.67
  -5 -10  10   58.84   10.73
   5  10 -10   43.15   12.30
  -5 -10  10   61.92    8.21
  -5  -9   1    4.66    3.91
   5   9  -1    5.04    6.84
   5   9  -1   14.04    7.04
  -5  -9   2    4.97    4.49
   5   9  -2    7.93    6.02
   5   9  -2    2.19    6.44
  -5  -9   3   33.82    6.94
   5   9  -3   50.73   11.03
   5   9  -3   28.85   11.00
  -5  -9   4   35.49   10.36
   5   9  -4   11.21    6.70
   5   9  -4   33.95   10.12
  -5  -9   5   90.02   11.89
   5   9  -5   46.34   10.60
   5   9  -5   40.50    9.93
  -5  -9   6   30.60    6.30
   5   9  -6   21.34    6.12
   5   9  -6   34.19    7.87
  -5  -9   7    2.95    4.93
   5   9  -7   12.56    7.48
   5   9  -7    4.42    5.51
  -5  -9   7    7.94    3.87
  -5  -9   8   18.19    6.25
   5   9  -8    6.16    4.06
   5   9  -8   25.14    8.51
  -5  -9   8   12.16    5.43
  -5  -9   9    1.49    5.58
   5   9  -9    3.89    3.40
   5   9  -9   22.37    9.04
  -5  -9   9   12.44    7.39
  -5  -9  10   41.67    8.20
   5   9 -10   31.74    5.11
   5   9 -10   59.47    9.24
  -5  -9  10   68.66   10.36
  -5  -9  11   14.44    6.81
   5   9 -11   33.02   10.75
  -5  -9  11   13.91    6.50
  -5  -9  12   25.49    8.74
   5   9 -12   37.15    8.83
  -5  -9  12   36.29    8.51
  -5  -8  -1   35.41    6.64
   5   8   1   62.75   13.40
   5   8   1   32.96   13.21
  -5  -8   0   15.95    6.30
   5   8   0    8.27    7.41
  -5  -8   1   22.66    5.92
   5   8  -1   41.47   13.37
   5   8  -1   43.46   12.49
  -5  -8   2   -1.25    4.00
   5   8  -2    5.34    6.23
   5   8  -2   13.28    6.27
  -5  -8   3   14.73    6.90
   5   8  -3   21.14   10.67
   5   8  -3   10.95    6.59
  -5  -8   4   17.90    5.24
   5   8  -4   33.38    9.31
   5   8  -4   49.49   10.75
  -5  -8   5  101.48   16.26
   5   8  -5  108.27   18.51
   5   8  -5  108.43   18.00
  -5  -8   5   80.29   12.16
  -5  -8   6  191.40   15.43
   5   8  -6  200.61   14.17
   5   8  -6  195.19   14.48
  -5  -8   6  200.90   12.74
  -5  -8   7  288.99   18.84
   5   8  -7  270.09   17.09
   5   8  -7  278.45   18.87
  -5  -8   7  260.43   16.15
  -5  -8   8  145.89   12.78
   5   8  -8  113.07   14.26
   5   8  -8  132.47   10.80
  -5  -8   8  120.22    7.48
  -5  -8   9   79.14    9.52
   5   8  -9   77.96    7.25
   5   8  -9   80.50    9.26
  -5  -8   9   84.20    9.46
  -5  -8  10   22.93    8.57
   5   8 -10    4.60    3.01
   5   8 -10    0.06    4.73
  -5  -8  10   -2.62    4.97
  -5  -8  11    4.52    5.59
   5   8 -11   16.52    7.23
  -5  -8  11   27.28   10.33
  -5  -8  12   26.54    7.60
   5   8 -12   21.64    7.25
  -5  -8  12   42.92   11.15
  -5  -8  13   10.74    5.74
   5   8 -13   18.88    7.42
  -5  -8  13   40.07   11.95
  -5  -7  -2   12.72    5.79
   5   7   2   16.90    8.20
  -5  -7  -1   29.39    8.16
  -5  -7  -1   46.05    9.73
   5   7   1   37.10   12.67
  -5  -7   0    4.97    3.29
  -5  -7   0   25.82    7.67
   5   7   0   10.03    9.16
  -5  -7   1   75.30   10.37
  -5  -7   1   59.03    9.81
   5   7  -1   64.66   12.90
  -5  -7   2   39.86    7.85
   5   7  -2   47.41   10.21
   5   7  -2   39.18    9.77
  -5  -7   3   98.77   13.09
   5   7  -3   87.50   13.52
   5   7  -3   91.61   12.54
  -5  -7   4   59.41   12.88
   5   7  -4   82.01    9.77
   5   7  -4   89.30   12.18
  -5  -7   4   65.20   12.34
   5   7  -5   34.38    8.24
   5   7  -5   45.07   11.24
  -5  -7   5   24.58    5.98
  -5  -7   6   68.00   10.10
   5   7  -6   50.46   11.81
   5   7  -6   45.64   11.33
  -5  -7   6   67.53    7.60
  -5  -7   7   95.97   11.59
   5   7  -7  115.10   11.57
   5   7  -7  107.94   12.63
  -5  -7   7   89.88    9.18
  -5  -7   8   44.69   11.77
   5   7  -8   22.47    5.49
   5   7  -8   36.03   11.07
  -5  -7   8   31.66    7.92
  -5  -7   9  208.53   14.97
   5   7  -9  218.78   13.54
   5   7  -9  229.53   15.99
  -5  -7   9  220.43   15.71
  -5  -7  10   20.26    5.92
   5   7 -10    9.08    5.48
  -5  -7  10   21.85    6.97
  -5  -7  11   64.01   11.79
   5   7 -11   78.48   11.99
  -5  -7  11  102.51   12.89
  -5  -7  12   34.72    9.00
   5   7 -12   17.33    7.90
  -5  -7  12    2.33    7.11
  -5  -7  13   11.00    6.25
   5   7 -13   14.73    7.73
  -5  -7  13   22.54   10.14
  -5  -6  -3   14.74    5.41
  -5  -6  -3   23.14    8.53
   5   6   3   30.85   11.44
  -5  -6  -2   14.01    4.65
  -5  -6  -2   16.02    7.27
   5   6   2   17.56    7.31
  -5  -6  -1   16.41    6.48
  -5  -6  -1   37.87   11.51
   5   6   1    7.28    9.35
  -5  -6   0   47.13    8.71
  -5  -6   0   62.86   12.10
   5   6   0   63.27   13.75
  -5  -6   1  177.66   16.67
  -5  -6   1  174.91   16.43
   5   6  -1  255.99   20.11
  -5  -6   2   32.45    6.59
  -5  -6   2   53.16    9.79
   5   6  -2   29.72    8.68
  -5  -6   3  151.21   17.58
  -5  -6   3  142.45   17.07
   5   6  -3  172.36   21.81
  -5  -6   3  136.52   14.22
  -5  -6   4  116.51   17.38
  -5  -6   4  116.62   17.01
   5   6  -4  130.86   20.63
  -5  -6   4   98.89   13.90
  -5  -6   4  102.95   14.68
  -5  -6   5  150.08   22.26
   5   6  -5  112.61   16.93
   5   6  -5  126.76   19.68
  -5  -6   5  129.56   18.34
  -5  -6   6   28.33    9.20
   5   6  -6   26.21    7.60
   5   6  -6   27.49    8.84
  -5  -6   6   25.34    7.49
  -5  -6   7    9.06    5.79
   5   6  -7    3.44    3.45
   5   6  -7   -3.65    5.45
  -5  -6   7   12.56    7.40
  -5  -6   8  116.23   16.15
   5   6  -8   97.07   11.03
   5   6  -8  101.29   12.26
  -5  -6   8  110.67   13.84
  -5  -6   9   71.64   11.02
   5   6  -9   49.94    9.71
  -5  -6   9   41.93   11.41
  -5  -6  10   24.23    9.98
   5   6 -10   14.61    5.17
  -5  -6  10   35.91   10.26
  -5  -6  11   21.50    7.45
   5   6 -11    4.54    4.46
  -5  -6  11   25.79    7.91
  -5  -6  12   24.11    7.64
   5   6 -12   23.32    7.79
  -5  -6  12   24.22   10.35
  -5  -6  13   41.13   10.70
   5   6 -13   16.08    6.15
  -5  -6  13   19.67   10.50
  -5  -5  -5    6.07    4.74
   5   5   5    4.61    6.73
  -5  -5  -4    8.40    4.06
  -5  -5  -4   17.16    6.52
   5   5   4   36.53   10.51
  -5  -5  -3   29.02    5.03
  -5  -5  -3   39.10    8.84
   5   5   3   57.00   11.43
  -5  -5  -2    4.10    2.95
  -5  -5  -2    5.12    5.24
   5   5   2    7.49   10.37
  -5  -5  -1  169.39   11.35
  -5  -5  -1  171.34   12.67
   5   5   1  158.32   13.85
  -5  -5   0   23.17    5.57
  -5  -5   0   26.19    8.20
   5   5   0   11.30    7.57
  -5  -5   1   44.61   11.99
  -5  -5   1   50.61   12.87
   5   5  -1   32.51   11.22
  -5  -5   2  185.25   19.77
  -5  -5   2  151.58   17.16
   5   5  -2  139.57   17.57
  -5  -5   2  149.50   14.75
  -5  -5   2  149.82   14.87
  -5  -5   3  518.40   22.81
  -5  -5   3  536.27   22.60
   5   5  -3  568.19   24.92
  -5  -5   3  455.07   17.47
  -5  -5   3  528.88   20.59
  -5  -5   4  321.79   15.16
  -5  -5   4  336.36   14.76
   5   5  -4  306.18   15.61
  -5  -5   4  305.06   12.31
  -5  -5   5   46.54    7.55
  -5  -5   5   50.98    6.17
   5   5  -5   58.84    8.49
  -5  -5   6  102.57   13.35
   5   5  -6  141.81   15.11
   5   5  -6  149.67   17.14
  -5  -5   7  195.88   42.17
   5   5  -7  142.83   14.45
   5   5  -7  162.38   16.59
  -5  -5   7  228.85   13.51
  -5  -5   8   68.52   16.51
   5   5  -8   69.39   14.90
   5   5  -8   75.00   16.20
   5   5  -8   84.96   19.58
  -5  -5   8   56.52   14.56
  -5  -5   9    7.85    8.92
   5   5  -9    8.56    1.81
   5   5  -9    7.45    4.69
  -5  -5   9    0.43    6.36
  -5  -5  10  232.72   15.73
   5   5 -10  178.43   12.16
  -5  -5  10  210.26   14.59
  -5  -5  11  140.58   12.70
   5   5 -11  133.90    9.31
  -5  -5  11  116.86   23.35
  -5  -5  12   92.61   10.29
   5   5 -12   60.31   10.27
  -5  -5  12   64.07   13.62
  -5  -5  13   31.30   10.07
   5   5 -13   32.76    6.70
  -5  -5  13   52.23   12.03
  -5  -5  14    1.47    4.84
   5   5 -14    5.80    3.66
  -5  -5  14   16.71   10.23
  -5  -4  -6   13.15    5.48
   5   4   6   26.29   13.01
  -5  -4  -5   12.12    5.10
   5   4   5   25.36   11.19
  -5  -4  -4   22.55    5.58
  -5  -4  -4   43.58    9.00
   5   4   4   49.47   12.39
  -5  -4  -3    3.90    2.29
   5   4   3   -5.37    7.47
  -5  -4  -2   12.56    4.26
  -5  -4  -2   10.42    4.88
   5   4   2   36.61   12.36
  -5  -4  -1  257.85   11.49
  -5  -4  -1  275.88   38.13
   5   4   1  250.33   48.49
  -5  -4   0   17.56    5.45
  -5  -4   0   18.50    6.12
   5   4   0   46.75   12.70
   5   4   0   40.47    8.89
  -5  -4   0   17.48    3.89
  -5  -4   1  494.33   20.51
  -5  -4   1  471.45   28.93
   5   4  -1  501.62   22.97
   5   4  -1  437.29   16.47
  -5  -4   1  446.36   16.79
  -5  -4   2   13.75    7.77
  -5  -4   2   -5.16    3.88
   5   4  -2   20.19    9.86
   5   4  -2    1.23    0.78
  -5  -4   2    2.49    1.49
  -5  -4   3   48.48    7.53
  -5  -4   3   37.18    7.15
   5   4  -3   46.83    8.48
   5   4  -3   32.62    5.75
  -5  -4   3   37.84    4.58
  -5  -4   4    4.91    5.45
  -5  -4   4   12.04    3.61
   5   4  -4   10.74    5.99
   5   4  -4    1.89    2.58
  -5  -4   4    2.10    1.58
  -5  -4   5   85.92   10.77
  -5  -4   5   82.22    8.18
   5   4  -5  151.78   13.84
  -5  -4   6  613.50   27.54
  -5  -4   6  550.21   22.42
   5   4  -6  497.44   20.25
   5   4  -6  573.41   25.47
   5   4  -6  569.73   24.39
  -5  -4   7   66.31   10.00
   5   4  -7  121.16   12.15
   5   4  -7  130.23   13.46
   5   4  -7  105.69   12.07
   5   4  -7  121.49   13.80
  -5  -4   8  311.33   20.15
   5   4  -8  215.59   29.17
   5   4  -8  242.05   32.83
   5   4  -8  268.71   16.17
   5   4  -8  283.65   17.76
  -5  -4   9  164.26   19.66
   5   4  -9  204.14   22.87
  -5  -4  10   56.86   14.13
   5   4 -10   76.33    9.51
  -5  -4  10   56.58   13.67
  -5  -4  11   72.07   12.82
   5   4 -11   72.52   11.54
  -5  -4  11   89.53   16.17
  -5  -4  12  119.74   10.90
   5   4 -12  157.98   13.31
  -5  -4  12  127.51   12.74
  -5  -4  13   50.61    9.44
   5   4 -13   21.48    6.83
  -5  -4  13   27.20    9.05
   5   4 -14   19.03    8.46
  -5  -4  14   23.33    9.72
  -5  -3  -6    9.71    4.23
   5   3   6   21.43   10.89
  -5  -3  -5   14.46    5.05
   5   3   5   21.59   10.46
  -5  -3  -4   56.69   11.88
  -5  -3  -4   82.15   20.38
   5   3   4  114.98   21.11
  -5  -3  -3  107.68   10.04
   5   3   3   81.63   10.56
   5   3   3   91.41    7.92
  -5  -3  -2  377.28   14.63
  -5  -3  -2  407.90   34.34
   5   3   2  357.30   17.13
   5   3   2  325.69   11.47
  -5  -3  -2  325.87   11.33
  -5  -3  -1  168.25   17.47
  -5  -3  -1  147.80   19.00
   5   3   1  214.06   14.90
   5   3   1  228.01    9.43
  -5  -3  -1  133.69   13.32
  -5  -3   0   63.83    7.79
  -5  -3   0   80.29   16.00
   5   3   0  114.53   13.43
   5   3   0   94.06    9.48
  -5  -3   0   63.42    6.55
  -5  -3   1  390.78   16.36
  -5  -3   1  381.55   20.80
   5   3  -1  335.69   16.91
   5   3  -1  338.97   13.16
  -5  -3   1  330.35   12.29
  -5  -3   2  139.43   13.76
  -5  -3   2  159.47   23.77
   5   3  -2  163.85   16.05
   5   3  -2  162.93   15.41
  -5  -3   2  121.02   10.56
  -5  -3   3  807.84   26.96
  -5  -3   3  857.42   27.79
   5   3  -3  719.36   25.77
   5   3  -3  752.30   24.89
  -5  -3   3  752.53   23.45
  -5  -3   4  214.61   18.57
  -5  -3   4  196.35   15.31
   5   3  -4  225.90   19.15
   5   3  -4  238.95   22.38
  -5  -3   5  608.14   24.38
  -5  -3   5  568.56   20.84
   5   3  -5  558.15   20.17
   5   3  -5  564.90   22.87
   5   3  -5  583.58   23.79
  -5  -3   6  513.04   21.80
  -5  -3   6  448.96   16.37
   5   3  -6  377.96   13.89
   5   3  -6  399.32   17.40
   5   3  -6  396.62   15.90
  -5  -3   7  228.32   19.12
   5   3  -7  212.47   15.70
   5   3  -7  214.75   16.10
   5   3  -7  249.93   20.20
   5   3  -7  221.08   18.27
  -5  -3   8  210.79   14.54
   5   3  -8  205.55   10.44
   5   3  -8  223.38   12.81
  -5  -3   9   31.19   11.09
   5   3  -9   30.78    7.07
   5   3  -9   29.45    7.99
  -5  -3  10  105.52   11.89
   5   3 -10   86.17    9.93
   5   3 -10   97.02   11.72
  -5  -3  11  307.92   20.85
   5   3 -11  258.91   16.92
  -5  -3  11  316.87   22.53
  -5  -3  12   55.90    9.55
   5   3 -12   47.17    8.29
  -5  -3  12   76.14   10.53
   5   3 -13   33.05    7.96
  -5  -3  13   40.55   12.54
  -5  -2  -7   11.03    3.79
   5   2   7    6.24    6.64
  -5  -2  -6   38.93   10.21
   5   2   6   76.62   10.61
  -5  -2  -5   63.84   13.77
   5   2   5   63.05   12.42
   5   2   5   63.51    8.30
  -5  -2  -4   72.92    7.93
  -5  -2  -4   80.80   14.18
   5   2   4  104.77   13.85
   5   2   4   89.95    9.82
  -5  -2  -3  152.33   16.10
   5   2   3  127.09   13.73
  -5  -2  -3  168.51   22.77
   5   2   3  144.51   17.46
   5   2   3  149.56   15.87
  -5  -2  -3  122.25   12.91
  -5  -2  -2  244.83   11.00
  -5  -2  -2  273.25   19.92
   5   2   2  255.65   14.45
   5   2   2  259.94   10.76
  -5  -2  -2  255.76   10.54
  -5  -2  -1   83.86    9.43
  -5  -2  -1  106.73   15.91
   5   2   1   89.94   12.95
   5   2   1   93.43    9.38
  -5  -2  -1   76.81    7.93
  -5  -2   0  284.10   12.51
  -5  -2   0  286.73   16.76
   5   2   0  236.05   21.24
   5   2   0  231.83   19.54
  -5  -2   0  254.26   21.24
  -5  -2   1  588.86   20.10
  -5  -2   1  585.03   20.17
   5   2  -1  680.78   25.33
   5   2  -1  709.23   22.57
  -5  -2   1  542.85   17.20
  -5  -2   2  120.16   10.58
  -5  -2   2  140.82   20.65
   5   2  -2  107.58   11.98
   5   2  -2   89.81    7.75
  -5  -2   2  101.58    8.31
  -5  -2   3  698.17   23.78
  -5  -2   3  662.24   24.72
   5   2  -3  760.48   25.76
   5   2  -3  758.53   24.58
  -5  -2   3  614.19   19.57
  -5  -2   4    6.87    1.89
   5   2  -4    9.36    2.17
   5   2  -4   16.92    5.45
   5   2  -4   10.38    2.69
  -5  -2   5  140.04   12.82
  -5  -2   5  151.13   12.81
   5   2  -5  134.48   10.45
   5   2  -5  162.48   13.80
   5   2  -5  165.48   22.64
  -5  -2   6  123.57   13.43
  -5  -2   6  108.26   11.46
   5   2  -6   81.74    7.31
   5   2  -6  100.29   10.53
   5   2  -6  105.67   16.96
  -5  -2   7   71.94   10.30
   5   2  -7   63.69    6.19
   5   2  -7   63.50    7.77
   5   2  -7   73.30   12.78
  -5  -2   8  191.60   20.90
   5   2  -8  203.28   10.55
   5   2  -8  233.20   30.68
  -5  -2   9  106.82   13.94
   5   2  -9  106.82   12.69
   5   2  -9  106.65   14.42
  -5  -2  10  281.34   20.58
   5   2 -10  241.92   16.59
   5   2 -10  269.89   20.40
  -5  -2  11   16.31    6.76
   5   2 -11    9.29    5.14
   5   2 -11   10.39    5.31
  -5  -2  12   23.45    8.59
   5   2 -12   -0.22    1.77
  -5  -2  12   13.54    6.68
  -5  -2  13   14.61    8.82
   5   2 -13   13.72    5.02
  -5  -2  13   26.39   10.33
  -5  -1  -8   30.95   12.92
   5   1   8   66.28   11.14
  -5  -1  -7   32.73   11.81
   5   1   7   46.18    9.16
  -5  -1  -6   23.76   10.42
   5   1   6   36.18   10.41
   5   1   6   21.85    5.92
  -5  -1  -5   31.09    9.12
   5   1   5   55.76   13.33
   5   1   5   48.85   10.71
  -5  -1  -4    3.45    1.55
  -5  -1  -4   13.01    3.56
   5   1   4   15.21    7.51
   5   1   4   28.76    5.60
  -5  -1  -3  513.07   19.67
   5   1   3  410.25   16.41
  -5  -1  -3  545.01   41.38
   5   1   3  443.99   21.67
   5   1   3  402.57   16.66
  -5  -1  -2  102.41   10.42
   5   1   2   90.13    9.53
  -5  -1  -2   89.80   19.73
   5   1   2   95.33   12.85
   5   1   2  102.66   10.70
  -5  -1  -2   97.92   10.06
  -5  -1  -1  169.04   15.24
   5   1   1  154.37   13.40
  -5  -1  -1  177.93   26.26
   5   1   1  159.66   15.61
   5   1   1  179.72   15.40
  -5  -1  -1  161.65   14.03
  -5  -1   0  192.05   15.28
   5   1   0  152.11   12.25
  -5  -1   0  156.75   13.02
   5   1   0  186.90   17.33
   5   1   0  190.97   14.65
  -5  -1   0  143.17   11.24
  -5  -1   1  144.72   12.46
  -5  -1   1  167.80   14.18
   5   1  -1  189.74   15.93
   5   1  -1  174.68   13.67
  -5  -1   1  151.98   12.01
  -5  -1   2  128.85    9.38
  -5  -1   2  140.42    9.56
   5   1  -2   89.82    9.00
   5   1  -2   77.39    6.21
  -5  -1   2  115.27    7.48
  -5  -1   3  452.40   27.36
  -5  -1   3  418.40   24.47
   5   1  -3  468.43   26.96
   5   1  -3  506.12   30.21
   5   1  -3  521.24   30.17
  -5  -1   4  171.21   12.64
  -5  -1   4  142.27   11.36
   5   1  -4  151.97   11.97
   5   1  -4  165.99   14.66
   5   1  -4  162.58   10.85
  -5  -1   5 1117.84   36.60
  -5  -1   5 1091.10   33.12
   5   1  -5  947.57   28.67
   5   1  -5 1027.88   32.52
   5   1  -5  982.68   34.11
  -5  -1   6  813.06   32.24
  -5  -1   6  732.72   25.87
   5   1  -6  729.44   25.29
   5   1  -6  774.28   28.29
   5   1  -6  769.04   28.77
  -5  -1   7  137.91   13.26
  -5  -1   7  117.67   11.43
   5   1  -7   99.59    9.37
   5   1  -7  102.59   10.99
   5   1  -7  107.19   19.46
  -5  -1   8  115.19   14.34
   5   1  -8  121.62   13.13
   5   1  -8  129.86   17.27
  -5  -1   9   24.97   10.64
   5   1  -9   25.17    5.73
   5   1  -9   20.41    6.03
  -5  -1  10   90.17   12.82
   5   1 -10   69.82    9.56
  -5  -1  11   24.65    9.88
   5   1 -11   10.52    3.30
   5   1 -11    9.84    4.83
  -5  -1  12   13.73    7.23
   5   1 -12   10.75    2.95
  -5  -1  12   14.10    6.44
  -5  -1  13   26.48    9.76
   5   1 -13   18.26    5.36
  -5  -1  13   32.84   11.50
  -5   0  -8   17.11    6.23
   5   0   8   21.22    8.87
   5   0   8   13.44    4.72
  -5   0  -7    9.59    4.26
   5   0   7   24.88    7.39
   5   0   7   18.52    5.85
  -5   0  -6   17.48    5.66
   5   0   6   29.96    7.56
   5   0   6   28.87    6.20
  -5   0  -5   21.06    5.55
   5   0   5   24.16    8.84
   5   0   5   14.11    4.14
  -5   0  -4  254.11   36.51
   5   0   4  252.60   36.35
  -5   0  -4  262.08   17.67
   5   0   4  267.39   16.91
   5   0   4  256.85   37.39
  -5   0  -3   32.47    3.80
   5   0   3    6.94    1.95
  -5   0  -3   23.27    5.49
   5   0   3   15.50    9.15
   5   0   3   22.21    5.15
  -5   0  -2  233.17   19.53
   5   0   2  320.72   12.38
  -5   0  -2  227.95   20.11
   5   0   2  400.62   15.76
  -5   0  -1  535.25   17.52
   5   0   1  455.08   33.39
  -5   0  -1  535.19   19.56
   5   0   1  479.64   40.84
   5   0   1  475.15   39.52
  -5   0   0   16.44    3.81
   5   0   0   36.70    4.25
  -5   0   0   20.55    4.42
   5   0   0   34.42    5.73
   5   0   0   36.35    5.70
  -5   0   0   14.76    2.42
  -5   0   1  499.14   29.25
  -5   0   1  535.66   31.41
   5   0  -1  518.57   30.19
   5   0  -1  552.55   31.96
  -5   0   2   88.53    7.79
  -5   0   2   90.35    6.62
   5   0  -2   77.00    5.51
   5   0  -2   95.29    8.81
   5   0  -2  103.30    7.79
  -5   0   3  160.65   11.32
  -5   0   3  154.94   10.27
   5   0  -3  130.06    8.41
   5   0  -3  167.51   11.85
  -5   0   3  138.45    8.97
   5   0  -3  152.49   10.36
  -5   0   4  565.84   21.05
  -5   0   4  580.93   18.85
   5   0  -4  568.95   17.96
   5   0  -4  622.00   20.24
  -5   0   4  497.13   16.47
   5   0  -4  608.26   24.02
  -5   0   5  429.90   33.41
  -5   0   5  403.86   29.68
   5   0  -5  327.51   23.97
   5   0  -5  357.28   26.65
  -5   0   5  360.35   26.91
   5   0  -5  361.46   27.38
  -5   0   6  141.83   15.18
  -5   0   6  122.40   10.61
   5   0  -6  168.86   14.22
   5   0  -6  154.53   13.52
   5   0  -6  168.99   24.10
  -5   0   7   35.53    8.24
  -5   0   7   48.35    4.97
   5   0  -7   15.78    2.15
   5   0  -7   15.76    3.26
   5   0  -7   14.92    4.41
  -5   0   8  114.66   19.46
   5   0  -8   95.71   14.50
   5   0  -8   85.31   22.35
  -5   0   9   23.17   11.06
   5   0  -9    3.03    2.44
   5   0  -9    5.80    3.65
  -5   0  10    4.94    7.09
   5   0 -10   10.22    4.43
   5   0 -10    3.30    4.45
  -5   0  11   11.75    8.32
   5   0 -11   16.06    4.52
   5   0 -11   14.30    5.95
  -5   0  12   54.93   10.98
   5   0 -12   31.88    7.94
  -5   1  -9   35.07    9.24
   5  -1   9   55.56   10.90
   5  -1   9   48.90    8.22
  -5   1  -8   -0.64    3.75
   5  -1   8   12.15    7.53
   5  -1   8    3.01    3.72
  -5   1  -7   29.42    7.93
   5  -1   7   28.64    9.09
   5  -1   7   30.71    7.38
  -5   1  -6  209.47   15.14
   5  -1   6  156.96   12.60
   5  -1   6  194.45   12.53
  -5   1  -5   16.81    6.12
   5  -1   5    7.50    8.98
   5  -1   5   16.26    5.84
  -5   1  -4   26.75    3.97
  -5   1  -4   38.57    4.09
  -5   1  -4   50.97    7.86
   5  -1   4   58.76    8.11
  -5   1  -3    9.70    2.10
  -5   1  -3   14.11    4.78
   5  -1   3    5.91    5.72
   5  -1   3   15.15    4.20
  -5   1  -2  701.73   24.99
   5  -1   2  649.58   23.14
  -5   1  -2  775.70   29.04
   5  -1   2  642.99   25.73
   5  -1   2  647.77   24.41
  -5   1  -1  381.09   28.40
   5  -1   1  351.88   26.18
  -5   1  -1  444.51   33.65
   5  -1   1  383.48   29.45
   5  -1   1  368.74   27.90
  -5   1   0  676.47   19.82
   5  -1   0  678.05   19.36
  -5   1   0  672.98   20.89
   5  -1   0  675.03   20.41
   5  -1   0  743.53   21.90
  -5   1   1  793.19   23.64
  -5   1   1  829.54   24.07
   5  -1  -1  823.84   23.66
  -5   1   1  752.24   21.34
   5  -1  -1  884.10   25.33
  -5   1   2  111.20    9.49
  -5   1   2   98.56    8.30
   5  -1  -2  110.09    8.12
  -5   1   2  105.13    7.68
   5  -1  -2  104.14    8.32
  -5   1   3  189.39   14.28
  -5   1   3  214.70   13.88
   5  -1  -3  228.58   13.63
   5  -1  -3  241.26   14.90
  -5   1   3  161.88   10.09
   5  -1  -3  244.67   15.49
  -5   1   4   37.84    8.28
  -5   1   4   26.63    4.03
   5  -1  -4   12.79    2.36
   5  -1  -4   17.68    3.04
  -5   1   4   11.50    2.71
   5  -1  -4   12.45    4.09
  -5   1   5  152.37   16.30
  -5   1   5  131.77   11.72
   5  -1  -5  134.79   11.88
   5  -1  -5  143.53   12.48
  -5   1   5  123.36   10.77
   5  -1  -5  163.26   19.16
  -5   1   6  199.10   18.89
  -5   1   6  198.18   15.26
   5  -1  -6  172.46   13.16
   5  -1  -6  183.91   14.19
  -5   1   6  188.66   14.88
   5  -1  -6  208.77   16.86
  -5   1   7  431.97   20.67
  -5   1   7  399.36   15.54
   5  -1  -7  402.52   15.39
   5  -1  -7  417.28   16.71
  -5   1   7  362.06   14.65
   5  -1  -7  404.05   18.07
  -5   1   8  171.54   19.98
  -5   1   8  170.76   17.69
  -5   1   8  192.17   19.63
   5  -1  -8  196.50   20.46
   5  -1  -8  208.29   28.45
  -5   1   9   32.44   11.62
   5  -1  -9   28.60    7.75
   5  -1  -9   29.09    7.47
  -5   1  10   11.55    6.46
   5  -1 -10   18.01    4.92
   5  -1 -10   35.04    9.12
  -5   1  11   36.34   13.32
   5  -1 -11    9.21    3.27
   5  -1 -11   27.15    9.23
  -5   1  12    9.30    6.09
   5  -1 -12   16.04    7.28
  -5   2  -9   -0.47    2.54
   5  -2   9   10.73    7.01
   5  -2   9   12.99    6.20
  -5   2  -8   17.37    8.74
   5  -2   8   10.70    6.48
   5  -2   8   23.44    5.77
  -5   2  -7  193.10   10.45
   5  -2   7  184.86   12.18
   5  -2   7  188.87   10.72
  -5   2  -6  338.49   20.50
   5  -2   6  272.07   16.43
  -5   2  -5  181.71   20.08
   5  -2   5  270.87   13.47
   5  -2   5  248.09   47.82
  -5   2  -4  514.93   19.01
  -5   2  -4  535.71   19.86
  -5   2  -4  577.67   24.58
   5  -2   4  488.43   22.41
   5  -2   4  501.26   21.74
  -5   2  -3   69.96    8.08
  -5   2  -3   86.24    8.76
  -5   2  -3   83.16   11.08
   5  -2   3  147.03   15.04
   5  -2   3  122.04   13.19
  -5   2  -2   19.74    3.42
  -5   2  -2   28.79    4.28
  -5   2  -2   27.54    5.61
   5  -2   2    6.48    4.64
   5  -2   2   21.14    5.45
  -5   2  -1   30.39    3.60
  -5   2  -1   27.09    4.83
  -5   2  -1   21.77    4.48
   5  -2   1    6.61    4.87
   5  -2   1   22.30    4.84
  -5   2   0 1549.77   46.71
  -5   2   0 1751.84   53.14
  -5   2   0 1732.38   52.97
   5  -2   0 1689.46   51.26
   5  -2   0 1675.89   51.14
  -5   2   1  852.78   24.94
  -5   2   1  858.18   24.64
   5  -2  -1  770.14   22.07
  -5   2   1  822.64   22.82
   5  -2  -1  762.95   22.51
  -5   2   2 4724.09  140.00
  -5   2   2 4826.05  390.43
   5  -2  -2 4790.19  387.32
  -5   2   2 4432.90  130.34
   5  -2  -2 4935.64  399.48
  -5   2   3  846.13   28.16
  -5   2   3  807.42   25.79
   5  -2  -3  863.62   26.59
  -5   2   3  832.08   25.61
   5  -2  -3  844.12   27.50
  -5   2   4  753.93   28.99
  -5   2   4  738.71   26.78
   5  -2  -4  596.08   21.71
   5  -2  -4  652.31   23.13
  -5   2   4  684.99   24.14
   5  -2  -4  674.05   25.54
  -5   2   5  143.01   15.29
  -5   2   5  150.70   13.72
   5  -2  -5  191.98   16.22
   5  -2  -5  211.34   17.64
  -5   2   5  132.77   11.37
  -5   2   6   25.78    8.22
  -5   2   6   19.56    3.29
   5  -2  -6   13.31    2.35
   5  -2  -6   25.21    3.23
  -5   2   6   26.41    3.96
   5  -2  -6   22.74    3.56
  -5   2   7   71.55   18.43
  -5   2   7   82.77   17.96
   5  -2  -7   79.60   18.45
  -5   2   7   63.20   13.70
   5  -2  -7   77.33   22.06
  -5   2   8   86.38   11.22
  -5   2   8  102.56    9.23
   5  -2  -8  112.11   10.84
   5  -2  -8  119.05   17.08
  -5   2   9   94.83   16.57
   5  -2  -9  117.91   14.98
   5  -2  -9  144.69   27.13
  -5   2  10  191.44   15.68
   5  -2 -10  183.72   12.17
   5  -2 -10  260.60   19.64
  -5   2  11   67.93    8.92
   5  -2 -11   96.93   12.49
  -5   3  -9   12.49    5.68
   5  -3   9   13.09    7.10
   5  -3   9    6.58    4.57
  -5   3  -8   57.24   10.06
   5  -3   8   56.55   10.74
   5  -3   8   47.69    8.77
  -5   3  -7   37.00    8.01
   5  -3   7   47.57   11.42
   5  -3   7   51.54   11.24
  -5   3  -6  133.09   14.31
   5  -3   6  117.11   14.43
   5  -3   6  111.22   11.65
  -5   3  -5  177.48   25.22
   5  -3   5  130.46   19.93
   5  -3   5  120.86   18.26
  -5   3  -4  487.66   21.28
  -5   3  -4  559.70   21.13
  -5   3  -4  638.80   26.80
   5  -3   4  568.60   24.67
   5  -3   4  577.51   24.19
  -5   3  -3  740.39   29.71
  -5   3  -3  877.72   34.87
  -5   3  -3  863.46   35.71
   5  -3   3  882.04   36.79
   5  -3   3  850.26   35.28
  -5   3  -2 1026.21   35.65
  -5   3  -2 1127.41   40.61
   5  -3   2 1061.86   38.82
   5  -3   2 1091.85   39.60
  -5   3  -1   24.41    4.64
  -5   3  -1   32.70    5.10
  -5   3  -1   37.36    6.62
   5  -3   1   57.18    7.19
   5  -3   1   61.93    8.55
  -5   3   0  305.10   23.69
  -5   3   0  285.75   22.05
   5  -3   0  276.75   24.36
   5  -3   0  309.38   23.63
   5  -3   0  308.85   23.54
  -5   3   1   34.67    4.92
  -5   3   1   34.85    5.37
   5  -3  -1   33.34    5.49
   5  -3  -1   44.40    5.11
   5  -3  -1   49.22    6.31
  -5   3   2   14.16    8.74
  -5   3   2    9.13    4.46
   5  -3  -2   17.69    2.18
   5  -3  -2   16.44    3.05
   5  -3  -2    8.07    4.38
  -5   3   3  420.18   16.86
   5  -3  -3  301.48   11.11
  -5   3   3  378.16   13.70
   5  -3  -3  289.79   13.42
  -5   3   4  698.49   30.49
  -5   3   4  711.54   29.62
   5  -3  -4  733.24   28.51
  -5   3   4  669.02   26.17
   5  -3  -4  813.65   33.50
  -5   3   5  514.69   22.73
  -5   3   5  529.96   21.30
   5  -3  -5  522.82   19.33
  -5   3   5  500.33   18.75
   5  -3  -5  538.53   28.44
  -5   3   6  383.06   22.15
  -5   3   6  376.35   19.82
   5  -3  -6  327.50   16.20
  -5   3   6  345.83   17.18
   5  -3  -6  345.43   20.15
  -5   3   7  106.32   11.56
   5  -3  -7  117.97    9.94
   5  -3  -7  125.09   24.27
  -5   3   8   35.38    9.25
  -5   3   8   37.43    6.60
   5  -3  -8   18.47    4.56
   5  -3  -8   43.30   10.15
  -5   3   9   25.07    7.63
   5  -3  -9   22.88    6.33
  -5   3  10   31.29   12.34
   5  -3 -10   31.61    7.02
  -5   3  11   35.00    7.97
   5  -3 -11    6.25    4.45
  -5   4 -10   48.69    7.37
   5  -4  10   54.52   11.10
   5  -4  10   52.72    7.79
  -5   4  -9   80.50   10.75
   5  -4   9   51.51    9.73
   5  -4   9   64.45    9.40
  -5   4  -8   98.71   11.15
   5  -4   8  130.18   14.55
   5  -4   8   89.13   10.50
  -5   4  -7   82.50   13.39
   5  -4   7   59.70   12.15
   5  -4   7   59.75   11.17
  -5   4  -6    2.70    4.46
   5  -4   6   14.55    6.25
   5  -4   6   23.86    8.80
  -5   4  -5   41.47    6.22
  -5   4  -5   44.59    6.84
  -5   4  -5   41.75    8.81
   5  -4   5   45.52    8.96
   5  -4   5   54.00   10.59
  -5   4  -4  853.99   31.56
  -5   4  -4  980.51   36.49
   5  -4   4  904.38   35.99
   5  -4   4  987.78   39.16
  -5   4  -3  277.27   20.64
  -5   4  -3  306.16   23.06
  -5   4  -3  343.68   27.33
   5  -4   3  284.26   22.59
   5  -4   3  280.14   22.32
  -5   4  -2 1650.04   64.62
  -5   4  -2 1922.99  185.92
   5  -4   2 1777.38   69.72
   5  -4   2 1757.82   69.44
  -5   4  -1  748.82   27.66
  -5   4  -1  760.09   28.55
   5  -4   1  726.62   25.86
   5  -4   1  807.61   29.14
   5  -4   1  867.67   32.36
  -5   4   0 1014.52   36.68
  -5   4   0 1071.06   39.22
   5  -4   0  915.89   31.86
   5  -4   0  939.83   33.05
   5  -4   0 1017.62   36.96
  -5   4   1  291.69   13.95
  -5   4   1  328.24   15.11
   5  -4  -1  323.22   16.90
   5  -4  -1  356.52   13.44
   5  -4  -1  349.63   15.40
  -5   4   2  201.12   19.86
  -5   4   2  209.76   18.74
   5  -4  -2  188.98   16.60
   5  -4  -2  178.31   14.76
   5  -4  -2  204.88   18.95
  -5   4   3   67.33    8.87
   5  -4  -3   59.67    8.89
  -5   4   4  536.67   23.33
  -5   4   4  549.10   22.88
   5  -4  -4  679.15   27.64
  -5   4   5  875.37   45.10
  -5   4   5  807.71   40.47
   5  -4  -5  732.57   37.31
  -5   4   6  626.47   40.08
  -5   4   6  625.34   38.43
   5  -4  -6  686.75   42.76
  -5   4   7  166.37   15.97
  -5   4   7  156.59   11.07
   5  -4  -7  103.42   28.54
  -5   4   8   72.83   10.44
  -5   4   8   59.06   10.82
   5  -4  -8   55.51   12.30
  -5   4   9   10.30    6.29
   5  -4  -9   27.68    8.34
  -5   4  10   25.47   10.73
   5  -4 -10   18.51    6.65
  -5   5 -10    1.98    3.60
   5  -5  10    9.85    6.61
   5  -5  10   10.53    5.33
  -5   5  -9   48.71    7.83
   5  -5   9   56.71   12.49
   5  -5   9   34.10    9.45
  -5   5  -8  116.65   10.76
   5  -5   8  115.95   13.26
   5  -5   8  127.22   13.71
  -5   5  -7  154.31   12.74
   5  -5   7  127.97   10.69
   5  -5   7  138.38   12.82
  -5   5  -6  332.76   16.89
  -5   5  -6  332.62   19.84
   5  -5   6  326.34   20.37
   5  -5   6  326.90   19.61
  -5   5  -5  171.44   17.94
  -5   5  -5  166.59   18.90
   5  -5   5  161.82   19.17
   5  -5   5  178.22   20.28
  -5   5  -4  673.42   33.02
  -5   5  -4  845.36   41.71
   5  -5   4  749.64   38.40
   5  -5   4  802.20   40.98
  -5   5  -3  572.17   22.72
  -5   5  -3  594.07   25.13
   5  -5   3  586.70   23.73
   5  -5   3  645.75   27.82
  -5   5  -2  131.31   14.68
  -5   5  -2  125.91   14.09
   5  -5   2  166.23   13.70
   5  -5   2  130.81   14.20
  -5   5  -1  717.41   29.86
  -5   5  -1  739.60   31.74
   5  -5   1  570.40   22.92
   5  -5   1  627.89   25.51
   5  -5   1  637.05   27.57
  -5   5   0 1351.29   54.70
  -5   5   0 1400.49   56.63
   5  -5   0 1310.70   50.86
   5  -5   0 1386.21   54.00
  -5   5   1 1376.66   55.60
  -5   5   1 1406.47   56.30
   5  -5  -1 1368.10   52.78
   5  -5  -1 1361.39   52.60
   5  -5  -1 1374.35   54.77
  -5   5   2  204.96   12.04
  -5   5   2  199.82   11.12
   5  -5  -2  243.51   12.63
  -5   5   3   73.60   17.20
  -5   5   3  100.47   15.77
   5  -5  -3   35.87    9.81
  -5   5   4   22.58    7.14
  -5   5   4   17.90    6.57
   5  -5  -4   46.56    9.05
  -5   5   5   50.06   12.97
  -5   5   5   59.87   13.35
   5  -5  -5   36.85    9.24
  -5   5   6   21.36    6.13
  -5   5   6   16.94    5.61
   5  -5  -6   32.36    7.00
  -5   5   7  186.96   17.50
  -5   5   7  164.52   11.83
   5  -5  -7  139.21   21.18
  -5   5   8  154.93   14.91
  -5   5   8  162.57   13.02
   5  -5  -8  138.91   20.56
  -5   5   9   88.87   12.92
   5  -5  -9   53.53   13.89
  -5   6 -10    6.43    5.24
   5  -6  10   10.80    6.56
   5  -6  10   16.49    7.36
  -5   6  -9   34.63    7.88
   5  -6   9   27.58    8.79
  -5   6  -8   10.70    6.47
  -5   6  -8    4.45    4.68
   5  -6   8   19.20    6.18
  -5   6  -7  127.69    8.47
  -5   6  -7  121.27    7.99
   5  -6   7  160.36   12.65
  -5   6  -6  411.29   21.40
  -5   6  -6  448.42   25.82
  -5   6  -6  479.67   26.66
   5  -6   6  340.64   20.76
  -5   6  -5  464.36   28.82
  -5   6  -5  532.81   34.15
  -5   6  -5  521.61   32.70
   5  -6   5  680.91   42.73
  -5   6  -4  826.33   28.60
   5  -6   4  680.12   26.35
  -5   6  -3  134.41   19.55
  -5   6  -3  117.80   17.51
   5  -6   3  179.37   25.12
   5  -6   3  161.93   23.09
  -5   6  -2   10.37    5.46
   5  -6   2    8.00    4.91
   5  -6   2    6.72    4.46
  -5   6  -1   71.63    9.85
   5  -6   1   59.95    6.52
   5  -6   1   63.90    6.96
   5  -6   1   62.52    8.75
   5  -6   0  344.84   15.92
  -5   6   0  327.81   16.01
   5  -6   0  325.02   12.45
   5  -6   0  319.25   12.55
   5  -6   0  351.43   17.03
  -5   6   1   93.51   21.33
   5  -6  -1  108.93   16.69
  -5   6   2  875.52   31.87
  -5   6   2  877.45   31.76
   5  -6  -2  851.10   30.24
  -5   6   3  273.86   13.35
  -5   6   3  292.23   13.94
   5  -6  -3  346.64   14.74
  -5   6   4  552.48   32.21
  -5   6   4  562.05   30.31
   5  -6  -4  618.69   33.02
  -5   6   5   16.02    8.87
  -5   6   5   15.99    4.99
   5  -6  -5   25.73    6.49
  -5   6   6   37.83   10.48
  -5   6   6   40.40    8.95
   5  -6  -6   41.22   10.52
  -5   6   7   11.79    5.79
   5  -6  -7    4.40    2.08
  -5   6   8   14.27    6.82
  -5   6   8    8.11    4.77
   5  -6  -8    6.78    3.12
  -5   7  -9  182.87   19.54
  -5   7  -9  168.64   17.89
   5  -7   9  185.69   21.90
  -5   7  -8   30.53    7.72
  -5   7  -8   52.69    8.28
   5  -7   8   18.23    6.15
  -5   7  -7  150.89   13.00
  -5   7  -7  140.53   11.36
   5  -7   7  125.46   11.83
  -5   7  -6  123.92    8.71
  -5   7  -6  142.57   14.46
  -5   7  -6  135.07   11.30
   5  -7   6  137.89   11.45
  -5   7  -5  298.72   17.28
  -5   7  -5  310.33   18.79
  -5   7  -5  309.24   17.86
   5  -7   5  327.93   20.01
   5  -7   4  495.46   30.92
  -5   7  -4  560.47   34.55
   5  -7   4  497.05   31.83
   5  -7   3  489.51   30.52
  -5   7  -3  397.92   18.54
   5  -7   3  457.44   28.99
   5  -7   3  478.93   19.99
   5  -7   2  668.33   24.47
  -5   7  -2  695.72   26.34
   5  -7   2  609.25   21.14
   5  -7   2  653.54   25.25
   5  -7   1  284.72   13.67
  -5   7  -1  259.97   13.17
   5  -7   1  275.56   10.18
   5  -7   1  268.79   13.46
   5  -7   0   69.67   12.59
  -5   7   0   47.13    9.46
   5  -7   0   64.36    9.38
   5  -7   0   76.60   13.77
   5  -7  -1    8.42    4.93
  -5   7   1    3.65    5.02
   5  -7  -1   -2.15    3.67
   5  -7  -2  148.78   12.63
  -5   7   2  157.82   11.44
   5  -7  -2  158.77   10.65
  -5   7   3  488.62   29.86
  -5   7   3  482.55   29.79
   5  -7  -3  518.96   30.24
  -5   7   4  247.26   13.32
  -5   7   4  221.57   11.81
   5  -7  -4  265.48   13.06
  -5   7   5  131.46   13.63
  -5   7   5  124.97   11.88
   5  -7  -5  105.44   21.52
  -5   7   6   22.43    8.39
  -5   7   6   40.34    8.36
   5  -7  -6   12.38    4.61
  -5   7   7   23.87   12.46
  -5   7   7    0.68    3.98
   5  -7  -7    5.48    2.86
  -5   8  -9   14.70    5.21
  -5   8  -9   57.73    9.19
  -5   8  -8  170.46   14.93
  -5   8  -8  162.83   13.00
  -5   8  -7  304.25   20.99
  -5   8  -7  322.70   22.04
   5  -8   7  249.86   19.27
  -5   8  -6   83.26   10.66
  -5   8  -6   66.51   12.33
   5  -8   6   33.79    9.05
   5  -8   5  157.95    8.96
  -5   8  -5  147.38    9.77
  -5   8  -5  164.98    9.69
   5  -8   5  165.91   10.91
   5  -8   4   84.84   13.56
  -5   8  -4   70.53   12.86
  -5   8  -4   75.24   11.73
   5  -8   4   82.16   13.53
   5  -8   3  274.79   16.72
  -5   8  -3  232.09   15.58
   5  -8   3  293.04   18.74
   5  -8   2  776.00   40.68
  -5   8  -2  879.72   46.82
   5  -8   2  782.92   39.57
   5  -8   2  803.81   42.35
   5  -8   1  589.88   32.30
  -5   8  -1  480.73   28.28
   5  -8   1  541.76   29.72
   5  -8   0  511.84   30.28
  -5   8   0  529.19   31.40
   5  -8   0  461.87   27.43
   5  -8  -1  315.66   20.16
  -5   8   1  261.46   18.65
   5  -8  -1  294.08   18.28
   5  -8  -2    6.87    5.84
  -5   8   2   16.00    6.03
   5  -8  -2   34.80    8.14
   5  -8  -3   16.08    7.50
  -5   8   3   18.87    7.02
   5  -8  -3   10.01    5.29
  -5   8   4   50.55   10.74
  -5   8   4   28.51    9.01
   5  -8  -4   44.64   11.74
  -5   8   5   91.97   15.21
  -5   8   5  125.37   15.07
   5  -8  -5   72.28   15.34
  -5   9  -8  326.61   20.79
  -5   9  -8  336.05   20.48
   5  -9   8  347.33   77.65
  -5   9  -7  164.09   14.08
  -5   9  -7  123.95   10.77
   5  -9   6  400.55   26.61
  -5   9  -6  348.63   24.78
  -5   9  -6  376.91   25.89
   5  -9   6  351.98   26.00
   5  -9   5  358.19   23.58
  -5   9  -5  318.76   22.08
  -5   9  -5  364.71   23.77
   5  -9   5  320.88   22.98
   5  -9   4  101.64    9.43
  -5   9  -4  127.42   11.22
  -5   9  -4  131.27    9.79
   5  -9   4   85.08   11.29
   5  -9   3   50.69   10.99
  -5   9  -3   31.93    8.75
   5  -9   3   37.44    7.10
   5  -9   3   48.41   10.73
   5  -9   2   24.51    6.00
  -5   9  -2   27.97    7.02
   5  -9   2   22.30    7.20
   5  -9   1  168.17   13.30
  -5   9  -1  177.44   15.32
   5  -9   1  166.83   12.44
   5  -9   0  459.88   29.12
  -5   9   0  446.95   29.31
   5  -9   0  463.31   28.62
   5  -9  -1  375.68   25.62
  -5   9   1  336.91   23.57
   5  -9  -1  358.21   23.65
   5  -9  -2  268.47   20.58
  -5   9   2  311.40   23.16
   5  -9  -2  283.71   20.09
   5  -9  -3  140.05   17.43
  -5   9   3  154.59   16.92
   5  -9  -3  139.10   14.33
  -5   9   4    4.22    6.63
  -5   9   4   19.03    8.76
   5  -9  -4   13.71    5.49
  -5  10  -7   10.42    5.46
  -5  10  -7    5.89    4.99
   5 -10   7   21.66    7.36
   5 -10   6   83.14    9.38
  -5  10  -6   62.68    9.74
  -5  10  -6   83.08    9.27
   5 -10   6   70.09   10.69
   5 -10   5  306.36   21.49
  -5  10  -5  256.38   19.61
  -5  10  -5  259.15   17.49
   5 -10   5  269.93   20.65
   5 -10   4  258.35   18.84
  -5  10  -4  335.95   25.33
   5 -10   4  294.65   21.96
   5 -10   3  270.74   24.56
  -5  10  -3  288.91   22.29
   5 -10   3  321.98   22.45
   5 -10   2   80.91   10.81
  -5  10  -2   86.23   11.03
   5 -10   2   60.34    8.51
   5 -10   1   10.28    6.14
  -5  10  -1    1.35    6.03
   5 -10   1   22.45    9.03
   5 -10   0    9.20    5.77
  -5  10   0   20.44    7.84
   5 -10   0    5.19    3.55
   5 -10  -1    7.07    5.49
  -5  10   1   19.82    7.15
   5 -10  -1    4.04    3.46
   5 -10  -2   10.96    6.17
  -5  10   2   39.32    9.79
   5 -10  -2    6.87    3.48
   5 -11   5  154.07   24.14
  -5  11  -5   95.56   13.05
   5 -11   5  109.87   14.23
   5 -11   4   81.40   24.49
  -5  11  -4  162.41   20.01
   5 -11   4  138.45   16.42
   5 -11   3  192.17   30.72
  -5  11  -3  217.22   23.83
   5 -11   3  212.19   21.48
   5 -11   2  100.39   31.88
  -5  11  -2  172.30   21.01
   5 -11   2  161.89   17.87
  -6 -10   7    0.85    5.38
   6  10  -7    1.52    4.60
   6  10  -7    9.04    6.45
  -6 -10   8   12.64    6.54
   6  10  -8    5.25    5.60
   6  10  -8    1.09    5.99
  -6  -9   3   23.05    7.74
   6   9  -3   26.65    8.26
   6   9  -3   20.17    7.73
  -6  -9   4    0.63    4.66
   6   9  -4   22.94    8.69
   6   9  -4   25.73    9.26
  -6  -9   5   25.17    6.93
   6   9  -5   41.62   10.49
   6   9  -5   56.80   11.86
  -6  -9   6   41.50    8.11
   6   9  -6   36.94    8.48
   6   9  -6   41.98    9.75
  -6  -9   7   32.90    7.40
   6   9  -7   33.85    7.18
   6   9  -7   17.84    8.48
  -6  -9   8    1.25    5.86
   6   9  -8    7.83    4.07
   6   9  -8    6.88    5.91
  -6  -9   9   27.08    9.18
   6   9  -9   16.28    6.04
   6   9  -9   24.14    8.47
  -6  -9   9   24.90    5.20
  -6  -9  10    1.00    5.72
   6   9 -10   22.99    9.39
  -6  -9  10   10.55    4.79
  -6  -9  11   13.66    9.68
   6   9 -11   -1.17    6.13
  -6  -9  11   14.96    6.94
  -6  -8   1    5.57    3.69
   6   8  -1   17.30    8.47
   6   8  -1   11.18    7.60
  -6  -8   2   14.59    5.49
   6   8  -2    9.29    6.91
   6   8  -2   11.03    6.37
  -6  -8   3   15.50    7.33
   6   8  -3   42.98   14.12
   6   8  -3   16.16    7.54
  -6  -8   4    8.65    7.03
   6   8  -4   36.29   11.76
   6   8  -4   16.48    8.80
  -6  -8   5    5.03    4.88
   6   8  -5   27.19    6.99
   6   8  -5   10.33    8.94
  -6  -8   6   32.49    8.28
   6   8  -6   30.76    7.02
   6   8  -6   20.65    7.08
  -6  -8   7   20.08    8.06
   6   8  -7   20.92    6.93
   6   8  -7   25.29    9.15
  -6  -8   8   55.98   10.49
   6   8  -8   49.41    8.48
   6   8  -8   33.39    8.98
  -6  -8   8   52.95    9.04
  -6  -8   9   28.69    8.82
   6   8  -9   28.14    7.23
   6   8  -9   32.24   10.43
  -6  -8   9   39.85   10.11
  -6  -8  10    9.21    6.23
   6   8 -10   11.93    6.04
  -6  -8  10   11.60    7.93
  -6  -8  11   18.06    9.97
   6   8 -11   16.17    8.10
  -6  -8  11   14.03    8.51
  -6  -8  12    4.54    6.13
   6   8 -12   10.51    7.10
  -6  -8  12    2.91    6.09
  -6  -7  -1    2.97    2.88
  -6  -7  -1    6.13    5.40
   6   7   1   10.21    7.88
  -6  -7   0   40.16    9.43
  -6  -7   0   34.61    8.89
   6   7   0    7.37    6.68
  -6  -7   1    2.96    4.00
  -6  -7   1   17.64    7.59
   6   7  -1   18.66    9.93
  -6  -7   2   -2.44    4.49
  -6  -7   2    8.27    4.43
   6   7  -2   14.87    7.44
  -6  -7   3   72.03    8.45
  -6  -7   3   76.87    8.45
   6   7  -3   62.71   12.51
  -6  -7   4   22.50    6.53
   6   7  -4   14.81    5.96
   6   7  -4   15.70    9.91
  -6  -7   5   25.82    8.17
   6   7  -5   13.93    5.29
   6   7  -5   15.41    7.97
  -6  -7   5   11.23    2.85
   6   7  -6   24.43    7.11
   6   7  -6   30.15    8.76
  -6  -7   6   43.39    8.24
  -6  -7   7    6.88    6.32
   6   7  -7   11.82    7.23
   6   7  -7    3.43    5.53
  -6  -7   7   11.92    5.46
  -6  -7   8  155.29   11.33
   6   7  -8  115.10   20.54
   6   7  -8  123.45    9.90
  -6  -7   8  115.78   21.15
  -6  -7   9    7.50    6.26
   6   7  -9   16.13    4.28
   6   7  -9   25.74    8.90
  -6  -7   9   38.99   10.71
  -6  -7  10   30.49    9.53
   6   7 -10    8.78    6.86
  -6  -7  10   20.40    8.62
  -6  -7  11    9.28    5.81
   6   7 -11   10.39    5.26
  -6  -7  11    6.33    6.31
  -6  -7  12    7.55    5.95
   6   7 -12   12.86    6.79
  -6  -7  12    7.90    6.29
  -6  -7  13   13.75    7.12
   6   7 -13   10.94    5.38
  -6  -7  13   12.35    9.19
  -6  -6  -2   39.50    9.04
  -6  -6  -2   26.39    8.40
   6   6   2   22.99   10.06
  -6  -6  -1   -2.74    3.01
  -6  -6  -1    8.97    5.55
   6   6   1   35.80   10.38
  -6  -6   0    1.46    3.20
  -6  -6   0    3.69    4.52
   6   6   0   11.99    7.09
  -6  -6   1   48.16    7.99
  -6  -6   1   63.88   11.63
   6   6  -1   54.55   13.76
  -6  -6   2   69.37   11.88
  -6  -6   2   80.94   13.37
   6   6  -2   34.31   12.72
  -6  -6   3  116.83   13.85
  -6  -6   3  142.92   21.88
   6   6  -3  121.43   17.21
  -6  -6   3  104.09   10.90
  -6  -6   4   13.47    7.44
  -6  -6   4   11.97    4.89
   6   6  -4   41.61   10.85
  -6  -6   4   16.50    4.72
  -6  -6   5   71.36   11.20
  -6  -6   5   59.33   12.72
   6   6  -5   77.07   10.09
  -6  -6   5   53.63   11.35
  -6  -6   6   63.68   13.48
   6   6  -6   56.13   12.34
   6   6  -6   67.02    9.86
  -6  -6   6   81.80    9.10
  -6  -6   7   -2.57    6.41
   6   6  -7   -2.14    3.22
   6   6  -7   14.97    8.51
  -6  -6   7   26.20    8.04
  -6  -6   8   12.67    6.55
   6   6  -8    3.94    2.79
  -6  -6   8   34.07   10.92
  -6  -6   9   53.87   12.79
   6   6  -9   87.61   13.26
   6   6  -9   94.90   16.43
  -6  -6   9   45.61   10.38
  -6  -6  10  323.27   18.08
   6   6 -10  319.06   16.63
  -6  -6  10  329.10   16.46
  -6  -6  11   77.62   10.22
   6   6 -11  101.29   10.37
  -6  -6  11   62.69   12.02
  -6  -6  12  103.58   13.13
   6   6 -12   73.41    9.89
  -6  -6  12   76.77   15.62
  -6  -6  13   22.67    9.66
   6   6 -13   18.40    6.51
  -6  -6  13   32.33   11.08
  -6  -5  -3   31.14    6.04
  -6  -5  -3   56.19   12.89
   6   5   3   22.27    8.93
  -6  -5  -2    6.51    2.90
  -6  -5  -2   12.10    5.21
   6   5   2   15.69    7.10
  -6  -5  -1   31.23    6.78
  -6  -5  -1   61.97   13.03
   6   5   1   13.30    8.09
  -6  -5   0   18.34    4.63
  -6  -5   0   13.88    5.77
   6   5   0   26.22    7.40
  -6  -5   1   85.12   10.96
  -6  -5   1   89.67   12.47
   6   5  -1   66.36   12.93
  -6  -5   2   19.57    5.68
  -6  -5   2   38.95    9.46
   6   5  -2   29.61    9.53
  -6  -5   3   64.15   11.22
  -6  -5   3   61.70   11.67
   6   5  -3   86.12   16.52
   6   5  -3   70.73   10.72
  -6  -5   4   31.66    7.59
  -6  -5   4   16.19    4.08
   6   5  -4   34.40   10.77
   6   5  -4   29.60    5.43
  -6  -5   5  261.65   13.07
  -6  -5   5  260.02   11.24
   6   5  -5  290.91   15.53
   6   5  -5  264.10   10.88
  -6  -5   6   55.00   10.48
  -6  -5   6   47.42    8.01
   6   5  -6   54.32    9.48
  -6  -5   7   73.29   13.76
   6   5  -7   67.12   11.05
   6   5  -7   51.79   10.66
   6   5  -7   50.55    9.39
  -6  -5   8   16.45    7.67
   6   5  -8   13.00    4.12
   6   5  -8   15.56    5.81
  -6  -5   9   20.79   10.22
   6   5  -9   19.46    4.24
   6   5  -9   23.51    7.87
  -6  -5   9    7.16    6.22
  -6  -5  10    8.24    6.68
   6   5 -10    6.92    4.75
  -6  -5  10   13.85    7.30
  -6  -5  11    4.90    6.02
   6   5 -11   16.74    6.29
  -6  -5  11    1.22    6.12
  -6  -5  12   30.82   10.53
   6   5 -12   10.14    4.65
  -6  -5  12   20.59    9.71
  -6  -5  13    1.31    5.65
   6   5 -13    1.00    4.10
  -6  -5  13   18.31   10.46
  -6  -4  -4   19.06    8.39
   6   4   4   31.70   11.18
  -6  -4  -3   27.96    6.57
  -6  -4  -3   36.19   10.74
   6   4   3   41.98   12.81
  -6  -4  -2  167.02    9.01
  -6  -4  -2  173.33   24.34
   6   4   2  164.04   12.33
  -6  -4  -1   48.62    8.56
  -6  -4  -1   43.59   10.01
   6   4   1   54.50   12.44
  -6  -4   0  118.26   11.73
  -6  -4   0  147.97   21.25
   6   4   0  132.53   17.26
   6   4   0  117.81   11.16
  -6  -4   1  200.48   21.72
  -6  -4   1  183.05   23.65
   6   4  -1  203.90   24.45
   6   4  -1  140.96   17.02
  -6  -4   2   47.56   11.84
  -6  -4   2   48.07   12.15
   6   4  -2   42.93   13.66
   6   4  -2   28.25    8.07
  -6  -4   2   43.98    9.90
  -6  -4   3    6.68    5.56
  -6  -4   3   10.27    4.06
   6   4  -3   16.67    7.26
   6   4  -3    9.75    3.07
  -6  -4   3    0.90    2.06
  -6  -4   4  192.35   21.58
  -6  -4   4  205.30   16.39
   6   4  -4  208.40   13.30
   6   4  -4  180.29   19.13
  -6  -4   5 1157.60   45.85
  -6  -4   5 1098.08   41.64
   6   4  -5 1095.00   43.28
   6   4  -5 1025.96   41.87
  -6  -4   6  452.31   25.43
  -6  -4   6  424.69   21.86
   6   4  -6  475.87   25.95
   6   4  -6  421.41   26.55
  -6  -4   7  631.65   34.41
  -6  -4   7  585.33   29.20
   6   4  -7  459.88   22.96
   6   4  -7  545.07   28.93
   6   4  -7  572.07   30.23
  -6  -4   8   86.44   14.85
   6   4  -8  132.65   14.08
   6   4  -8  124.69   15.66
   6   4  -8  123.89   15.39
  -6  -4   9  186.25   16.42
   6   4  -9  159.32   15.15
   6   4  -9  166.08   15.72
  -6  -4  10   21.40   10.15
   6   4 -10   17.99    5.04
   6   4 -10   17.13    5.51
  -6  -4  11   23.53   10.36
   6   4 -11    7.39    6.29
  -6  -4  11   23.27    8.40
  -6  -4  12   25.33   10.71
   6   4 -12   42.10   10.83
  -6  -4  12   17.69    8.17
  -6  -4  13  121.18   14.42
   6   4 -13  128.58   14.67
  -6  -3  -5   31.07    9.80
   6   3   5   20.02    8.69
  -6  -3  -4  191.05   32.89
   6   3   4  257.89   21.96
  -6  -3  -3  207.06    9.15
  -6  -3  -3  201.74   31.00
   6   3   3  206.95   15.30
  -6  -3  -2   81.05    9.32
  -6  -3  -2   62.63   15.52
   6   3   2   72.04   12.18
   6   3   2   65.22    7.23
  -6  -3  -1    9.76    4.16
  -6  -3  -1   10.04    5.76
   6   3   1   32.40    9.87
  -6  -3   0  205.29   22.04
  -6  -3   0  201.59   34.48
   6   3   0  211.44   24.23
   6   3   0  189.57   19.95
  -6  -3   0  180.82   18.75
  -6  -3   1  250.34   13.08
  -6  -3   1  262.52   20.46
   6   3  -1  219.52   14.77
   6   3  -1  241.24   13.28
  -6  -3   1  200.22    8.65
  -6  -3   2   90.74   10.87
  -6  -3   2   78.92   15.06
   6   3  -2   82.79   11.07
   6   3  -2  107.42   13.35
  -6  -3   2   63.31    7.20
  -6  -3   3  568.93   24.64
  -6  -3   3  618.01   26.71
   6   3  -3  658.14   29.28
   6   3  -3  603.42   25.77
  -6  -3   4  207.89   17.60
  -6  -3   4  253.94   28.87
   6   3  -4  253.79   21.89
   6   3  -4  246.15   25.78
  -6  -3   5  704.51   31.26
  -6  -3   5  674.82   30.31
   6   3  -5  662.46   29.83
   6   3  -5  634.26   26.97
  -6  -3   6  225.86   12.60
  -6  -3   6  212.18   19.97
   6   3  -6  163.74   16.54
   6   3  -6  183.68   19.53
   6   3  -6  186.13   23.23
  -6  -3   7   10.07    9.92
  -6  -3   7    3.62    2.16
   6   3  -7    7.20    2.41
   6   3  -7   16.97    7.70
   6   3  -7   20.67    5.94
  -6  -3   8  270.11   15.94
   6   3  -8  248.51   46.94
   6   3  -8  251.71   47.56
   6   3  -8  311.20   14.49
   6   3  -8  277.65   14.37
  -6  -3   9  188.64   15.07
   6   3  -9  173.00   16.59
   6   3  -9  175.78   16.46
  -6  -3  10  154.69   15.62
   6   3 -10  161.91   11.69
   6   3 -10  165.26   13.89
  -6  -3  11   66.85   13.63
   6   3 -11   51.32   10.39
   6   3 -11   53.13   12.00
  -6  -3  12   28.65   10.85
   6   3 -12   25.23    8.18
  -6  -3  12   24.55    7.66
  -6  -3  13   16.30    6.93
   6   3 -13   10.78    4.62
  -6  -3  13    1.57    6.47
  -6  -2  -6   -1.57    4.25
   6   2   6    8.15    6.64
  -6  -2  -5   18.75    8.74
   6   2   5   18.75    8.00
  -6  -2  -4   43.50   11.17
   6   2   4   13.01   10.26
   6   2   4    7.93    2.15
  -6  -2  -3   59.80    9.30
  -6  -2  -3   79.38   17.02
   6   2   3  122.34   13.48
   6   2   3  117.21    8.03
  -6  -2  -2   31.60    6.94
  -6  -2  -2   41.89   10.10
   6   2   2   36.81   13.05
   6   2   2   19.66    4.92
  -6  -2  -1   46.71   10.92
  -6  -2  -1   50.51   14.69
   6   2   1   67.93   17.14
   6   2   1   51.51   11.35
  -6  -2  -1   33.27    7.55
  -6  -2   0   23.50    4.28
  -6  -2   0   17.06    2.91
   6   2   0   27.67    7.20
   6   2   0   18.80    3.75
  -6  -2   0   13.57    2.33
  -6  -2   1   30.86    5.41
  -6  -2   1   36.06    6.59
   6   2  -1   27.64    4.56
  -6  -2   2  313.51   24.82
  -6  -2   2  340.10   33.46
   6   2  -2  329.77   26.87
   6   2  -2  334.10   25.67
  -6  -2   3  577.65   25.40
  -6  -2   3  602.90   29.15
   6   2  -3  611.26   27.84
   6   2  -3  575.99   24.50
  -6  -2   4  108.97   14.26
  -6  -2   4   97.03   11.83
   6   2  -4   98.98   11.15
   6   2  -4  119.61   17.12
  -6  -2   5  513.91   22.57
   6   2  -5  448.92   18.50
   6   2  -5  518.34   22.85
   6   2  -5  519.09   22.21
  -6  -2   6  108.51   12.89
  -6  -2   6  107.88   12.80
   6   2  -6   91.75    9.34
   6   2  -6   94.58   10.54
   6   2  -6   96.78   16.16
  -6  -2   7   29.51    6.56
  -6  -2   7   24.38    5.18
   6   2  -7   39.34    4.42
   6   2  -7   38.51    5.94
   6   2  -7   41.13    7.97
  -6  -2   8   23.96    7.59
   6   2  -8   28.71    6.14
   6   2  -8   40.22    9.74
   6   2  -8   43.06   12.62
  -6  -2   9  115.36   12.97
   6   2  -9  119.73   11.82
   6   2  -9  124.87   27.66
  -6  -2  10  110.19   19.98
   6   2 -10   95.10   14.63
   6   2 -10  108.62   18.76
  -6  -2  11   50.90   13.39
   6   2 -11   34.64    7.27
   6   2 -11   30.97    8.07
  -6  -2  12   44.35   13.61
   6   2 -12   25.57    7.55
   6   2 -12   33.02    8.54
  -6  -2  13   43.38   11.90
   6   2 -13   32.77   11.78
  -6  -2  13   35.47   10.54
  -6  -1  -7    5.36    2.92
   6   1   7   20.69    9.27
  -6  -1  -6   30.83   12.22
   6   1   6   19.49    8.45
  -6  -1  -5   17.59    6.79
   6   1   5   13.13    6.86
   6   1   5   11.93    4.23
  -6  -1  -4    9.57    2.48
  -6  -1  -4    8.71    4.24
   6   1   4   20.75    8.18
   6   1   4   15.62    4.73
  -6  -1  -3  103.66    9.56
  -6  -1  -3  100.86   16.46
   6   1   3  139.28   17.03
   6   1   3  100.27    9.52
  -6  -1  -2  144.91   15.36
  -6  -1  -2  149.40   27.30
   6   1   2  146.36   17.81
   6   1   2  145.38   15.59
  -6  -1  -1  324.89   13.83
  -6  -1  -1  361.81   37.67
   6   1   1  313.66   13.42
  -6  -1   0  686.37   28.27
  -6  -1   0  700.20   30.46
   6   1   0  711.62   30.61
   6   1   0  693.59   28.33
  -6  -1   1  389.72   29.98
  -6  -1   1  400.76   30.79
   6   1  -1  318.93   25.41
   6   1  -1  339.54   25.76
  -6  -1   2  173.04   15.95
  -6  -1   2  166.27   15.35
   6   1  -2  179.98   18.23
   6   1  -2  164.81   15.08
  -6  -1   3   25.88    5.75
  -6  -1   3   34.38    5.51
   6   1  -3   54.66    8.35
   6   1  -3   60.88    7.64
  -6  -1   4  234.20   21.36
  -6  -1   4  219.76   19.04
   6   1  -4  251.70   22.70
   6   1  -4  268.92   19.63
  -6  -1   5  550.01   25.06
  -6  -1   5  571.70   23.61
   6   1  -5  504.14   20.60
   6   1  -5  579.07   24.64
   6   1  -5  608.07   25.74
  -6  -1   6   58.99    9.56
  -6  -1   6   38.48    5.92
   6   1  -6   18.04    2.75
   6   1  -6   23.25    5.03
   6   1  -6   26.49    7.81
  -6  -1   7  332.56   17.32
  -6  -1   7  326.57   12.81
   6   1  -7  318.20   12.37
   6   1  -7  382.03   16.39
   6   1  -7  360.64   19.42
  -6  -1   8  314.56   17.40
  -6  -1   8  282.75    9.21
   6   1  -8  257.80    8.41
   6   1  -8  323.00   13.34
   6   1  -8  291.15   13.46
  -6  -1   9    4.13    7.22
   6   1  -9    8.37    4.70
   6   1  -9   17.43    7.16
  -6  -1  10   98.38   18.05
   6   1 -10   28.33    5.99
   6   1 -10   59.71   12.36
  -6  -1  11   49.51   11.32
   6   1 -11   70.92   12.64
   6   1 -11   51.81   10.23
  -6  -1  12   25.00    9.82
   6   1 -12   29.96   10.08
   6   1 -12   35.95    7.90
  -6  -1  13   33.19    8.40
   6   1 -13   18.83    7.46
  -6  -1  13   46.13   11.20
  -6   0  -7    4.32    3.80
   6   0   7   13.61    7.82
  -6   0  -6   28.74    8.92
   6   0   6   27.92   10.70
   6   0   6   24.50    7.01
  -6   0  -5   33.00    7.21
   6   0   5   24.87    7.06
   6   0   5   32.92    7.27
  -6   0  -4    5.57    1.78
   6   0   4   18.47   10.32
   6   0   4   10.73    4.66
  -6   0  -3   32.99    5.46
   6   0   3   18.36    3.76
  -6   0  -3   40.89    9.32
   6   0   3   20.62    4.61
  -6   0  -2  148.49   20.59
   6   0   2  141.31   19.65
  -6   0  -2  147.69   21.50
   6   0   2  161.01   24.61
   6   0   2  165.83   23.30
  -6   0  -1   94.21   10.48
  -6   0  -1   95.72   11.76
   6   0   1   50.20    8.68
   6   0   1   63.78    7.81
  -6   0   0  432.75   18.67
  -6   0   0  443.03   20.59
   6   0   0  458.72   21.09
   6   0   0  464.88   19.78
  -6   0   1   76.27    9.45
  -6   0   1   71.54    8.01
   6   0  -1   67.53    7.87
   6   0  -1   48.16    5.78
  -6   0   2  610.63   24.30
  -6   0   2  642.48   24.59
   6   0  -2  657.78   25.89
   6   0  -2  615.06   23.39
  -6   0   3  180.79   17.47
  -6   0   3  173.64   15.82
   6   0  -3  138.65   12.82
   6   0  -3  158.35   14.51
  -6   0   4   71.92    9.71
  -6   0   4   72.61    8.41
   6   0  -4   54.69    6.97
   6   0  -4   66.71    8.01
  -6   0   5  252.59   20.92
  -6   0   5  247.75   19.17
   6   0  -5  145.78   11.32
   6   0  -5  164.67   13.51
   6   0  -5  196.26   24.74
  -6   0   6  323.15   26.90
  -6   0   6  319.66   23.85
   6   0  -6  338.94   25.16
   6   0  -6  387.68   29.07
   6   0  -6  395.68   26.24
  -6   0   7  553.58   31.58
  -6   0   7  498.38   24.69
   6   0  -7  420.11   20.86
   6   0  -7  516.29   26.39
   6   0  -7  467.69   24.94
  -6   0   8  102.40   15.69
  -6   0   8   71.64   10.48
   6   0  -8   72.02   10.50
   6   0  -8   92.23   10.67
   6   0  -8   98.53   18.62
  -6   0   9   97.41   13.28
   6   0  -9  118.72   13.45
   6   0  -9  111.74   20.77
  -6   0  10   57.36   12.15
   6   0 -10   52.62    7.31
   6   0 -10   56.55   13.40
  -6   0  11   13.99    9.05
   6   0 -11    8.48    3.10
   6   0 -11   24.85    8.45
  -6   0  12    6.20    6.70
   6   0 -12    3.31    2.41
   6   0 -12    4.02    4.89
  -6   1  -8   10.32    7.11
   6  -1   8   11.46    7.70
   6  -1   8    7.53    4.85
  -6   1  -7   25.70   11.67
   6  -1   7   21.33    9.94
   6  -1   7   11.48    4.48
  -6   1  -6   55.79   14.59
   6  -1   6   71.58   15.60
   6  -1   6   57.19   11.44
  -6   1  -5   11.84    4.99
   6  -1   5   20.30    7.06
  -6   1  -4  185.70   11.46
   6  -1   4  195.18   14.70
   6  -1   4  230.50   16.14
  -6   1  -3   35.14    5.52
  -6   1  -3   29.70    6.77
  -6   1  -3   57.71   10.51
   6  -1   3   28.58    7.61
   6  -1   3   59.58   10.45
  -6   1  -2   57.65    7.23
   6  -1   2   39.19    4.67
  -6   1  -2   71.40   10.15
   6  -1   2   78.14   10.84
   6  -1   2   69.29   10.22
  -6   1  -1   99.50   10.82
  -6   1  -1  124.87   14.00
   6  -1   1  109.54   13.05
   6  -1   1  118.71   12.35
  -6   1   0   69.99    8.92
  -6   1   0   61.88    8.06
   6  -1   0   67.07    8.81
   6  -1   0   91.46   10.31
  -6   1   1  754.43   28.40
  -6   1   1  811.55   30.13
   6  -1  -1  702.31   27.03
   6  -1  -1  717.31   26.79
  -6   1   2 1149.75   42.03
  -6   1   2 1193.54   42.67
   6  -1  -2 1228.84   43.92
   6  -1  -2 1237.49   44.17
  -6   1   3  119.53   12.58
  -6   1   3  141.08   13.30
   6  -1  -3   69.97    8.14
   6  -1  -3   69.11    8.59
  -6   1   4  830.31   35.11
  -6   1   4  800.37   32.47
   6  -1  -4  835.61   33.92
   6  -1  -4  922.99   37.77
  -6   1   5    5.33    7.09
  -6   1   5    9.07    3.57
   6  -1  -5    7.58    2.91
   6  -1  -5   -1.51    2.77
  -6   1   5   -0.74    2.23
   6  -1  -5    9.38    4.10
  -6   1   6   -0.98    8.22
  -6   1   6    6.69    3.46
   6  -1  -6    6.15    2.68
   6  -1  -6    6.85    3.61
  -6   1   6    5.76    3.00
   6  -1  -6    4.28    2.59
  -6   1   7  174.79   26.40
  -6   1   7  186.00   25.54
   6  -1  -7  118.38   16.33
   6  -1  -7  136.26   19.02
   6  -1  -7  159.94   31.71
  -6   1   8  163.24   17.62
  -6   1   8  140.79   11.91
   6  -1  -8  202.26   13.11
  -6   1   9  293.00   19.95
   6  -1  -9  255.71   15.19
   6  -1  -9  259.11   16.79
  -6   1  10  137.90   11.95
   6  -1 -10  156.62   32.44
  -6   1  11   47.93    9.68
   6  -1 -11   36.88    7.82
  -6   1  12   24.81   11.27
   6  -1 -12   27.67   10.03
  -6   2  -8    9.68    4.10
   6  -2   8   23.42    7.97
   6  -2   8   15.66    7.30
  -6   2  -7    5.41    4.38
   6  -2   7    6.99    6.22
   6  -2   7    4.32    4.20
  -6   2  -6   17.58    7.82
   6  -2   6   41.45   10.70
   6  -2   6   26.39    7.25
  -6   2  -5  154.79   12.24
   6  -2   5  125.84   16.33
   6  -2   5  120.43   14.61
  -6   2  -4  562.13   18.64
   6  -2   4  544.20   23.11
   6  -2   4  495.65   19.63
  -6   2  -3  140.85   19.57
  -6   2  -3  165.62   22.79
  -6   2  -3  183.21   26.15
   6  -2   3  226.63   32.99
   6  -2   3  213.74   29.87
  -6   2  -2  169.39   16.89
  -6   2  -2  224.32   10.47
  -6   2  -2  225.19   11.99
   6  -2   2  183.78   20.06
   6  -2   2  203.26   12.09
  -6   2  -1  118.76   12.88
  -6   2  -1  135.79   12.11
   6  -2   1  154.17   14.29
   6  -2   1  149.14   13.21
  -6   2   0   53.13    8.08
  -6   2   0   33.20    6.48
   6  -2   0   32.19    7.19
   6  -2   0   28.23    5.28
  -6   2   1   25.58    5.71
  -6   2   1   25.90    4.61
   6  -2  -1   15.71    5.98
   6  -2  -1   13.63    6.44
  -6   2   2    2.05    5.49
  -6   2   2   10.60    4.74
   6  -2  -2   17.34    4.95
  -6   2   2    2.21    2.28
   6  -2  -2   17.23    4.65
  -6   2   3  308.23   24.52
  -6   2   3  362.72   27.64
  -6   2   3  293.01   22.07
   6  -2  -3  368.02   28.68
  -6   2   4 1417.08   56.08
   6  -2  -4 1430.18   55.85
  -6   2   4 1236.00   48.34
   6  -2  -4 1422.68   56.98
  -6   2   5  144.45   16.42
  -6   2   5  151.56   15.88
   6  -2  -5  120.70   12.47
  -6   2   5  130.85   13.38
   6  -2  -5  114.34   12.83
  -6   2   6  430.60   24.66
  -6   2   6  408.06   21.04
   6  -2  -6  434.13   21.74
  -6   2   6  353.41   18.11
  -6   2   7   17.61   11.08
  -6   2   7   15.75    3.77
   6  -2  -7   17.44    3.55
   6  -2  -7   15.19    4.53
  -6   2   8    1.76    7.26
  -6   2   8    1.30    1.65
   6  -2  -8    3.63    1.61
   6  -2  -8    5.04    3.64
  -6   2   9  132.95   12.34
   6  -2  -9   71.16   11.14
   6  -2  -9   91.66   19.45
  -6   2  10   16.03    6.90
   6  -2 -10    8.34    3.98
  -6   2  11   53.29    8.51
   6  -2 -11   26.10    7.96
  -6   3  -8   16.10    6.04
   6  -3   8   38.90   10.58
   6  -3   8   36.09    9.13
  -6   3  -7   14.37    4.79
   6  -3   7   11.93    6.25
   6  -3   7   25.64    6.31
  -6   3  -6   35.13    8.92
   6  -3   6   38.70   11.22
   6  -3   6   46.58    9.18
  -6   3  -5   77.37   10.64
   6  -3   5   70.16   11.54
   6  -3   5   55.28   11.87
  -6   3  -4    1.01    1.46
  -6   3  -4    5.18    4.12
   6  -3   4    5.74    5.74
   6  -3   4    7.04    4.84
  -6   3  -3  172.03   23.53
  -6   3  -3  217.13   29.90
  -6   3  -3  215.41   30.56
   6  -3   3  249.16   37.29
   6  -3   3  275.82   16.78
  -6   3  -2  664.39   26.08
  -6   3  -2  767.45   31.38
   6  -3   2  700.73   28.92
   6  -3   2  632.44   26.45
  -6   3  -1  518.49   22.97
  -6   3  -1  495.01   22.42
   6  -3   1  552.23   25.55
   6  -3   1  538.95   23.58
  -6   3   0  622.36   26.73
  -6   3   0  638.41   27.41
   6  -3   0  603.85   25.95
   6  -3   0  567.97   24.52
  -6   3   1  112.34   13.02
  -6   3   1  122.16   13.81
   6  -3  -1   99.74   12.03
   6  -3  -1  137.92   11.88
   6  -3  -1  135.90   12.70
  -6   3   2   47.02    6.68
  -6   3   2   53.27    8.21
   6  -3  -2   35.98    4.05
   6  -3  -2   41.63    5.25
   6  -3  -2   41.98    6.39
  -6   3   3  578.62   26.54
  -6   3   3  609.08   25.90
   6  -3  -3  606.76   24.41
  -6   3   3  562.23   22.66
   6  -3  -3  618.52   26.44
  -6   3   4  105.21   11.95
   6  -3  -4  113.51   11.48
  -6   3   4  109.17   11.15
   6  -3  -4  111.90   12.57
  -6   3   5  685.81   36.52
  -6   3   5  708.70   35.56
   6  -3  -5  637.45   31.05
  -6   3   5  636.59   31.15
   6  -3  -5  695.15   35.88
  -6   3   6  456.33   20.08
  -6   3   6  426.67   15.81
   6  -3  -6  430.37   14.46
   6  -3  -6  476.11   19.84
  -6   3   7  111.43   15.13
  -6   3   7  108.34   12.12
   6  -3  -7   96.38   11.19
   6  -3  -7   97.43   18.34
  -6   3   8  198.27   14.82
  -6   3   8  206.47    9.29
   6  -3  -8  199.13   27.87
  -6   3   9    5.39    6.48
   6  -3  -9   14.02    5.50
  -6   3  10   16.13    7.59
   6  -3 -10   22.24    7.79
  -6   4  -8   26.27    7.56
   6  -4   8   54.29   13.13
   6  -4   8   26.35    7.17
  -6   4  -7   61.50   11.07
   6  -4   7   23.77    6.68
   6  -4   7   31.59    7.14
  -6   4  -6   24.29    8.80
   6  -4   6   57.90   10.98
   6  -4   6   52.51   10.25
  -6   4  -5  264.00   17.24
   6  -4   5  236.42   16.73
   6  -4   5  233.18   15.40
  -6   4  -4  304.47   19.18
  -6   4  -4  293.52   20.22
   6  -4   4  274.63   19.60
   6  -4   4  252.73   18.56
  -6   4  -3   45.39   11.80
  -6   4  -3   90.95   17.81
  -6   4  -3  114.57   14.11
   6  -4   3  132.74   16.78
   6  -4   3  102.80   12.59
  -6   4  -2  113.75   16.62
  -6   4  -2  116.03   17.77
   6  -4   2   92.89   20.49
   6  -4   2  104.04   16.69
  -6   4  -1  169.44   18.11
  -6   4  -1  166.38   18.27
   6  -4   1  184.29   19.50
   6  -4   1  191.59   20.78
  -6   4   0  687.41   28.21
  -6   4   0  714.47   29.43
   6  -4   0  684.33   26.52
   6  -4   0  724.35   29.18
  -6   4   1  206.67   12.45
  -6   4   1  188.26   19.81
   6  -4  -1  173.51   17.60
   6  -4  -1  202.54   10.15
   6  -4  -1  163.12   17.26
  -6   4   2   36.95    8.78
  -6   4   2   46.63    7.53
   6  -4  -2   52.49    6.91
   6  -4  -2   77.49    8.44
   6  -4  -2   62.26    8.32
  -6   4   3  265.19   18.04
  -6   4   3  281.40   16.52
   6  -4  -3  217.77   30.14
   6  -4  -3  237.67   32.16
  -6   4   4  200.33   28.15
   6  -4  -4  160.05   21.58
   6  -4  -4  192.31   27.47
  -6   4   5  267.33   14.15
  -6   4   5  283.35   12.73
   6  -4  -5  235.38   25.17
  -6   4   6    2.27    6.34
  -6   4   6    3.68    2.99
   6  -4  -6   21.17    5.07
  -6   4   7   55.06   10.89
  -6   4   7   49.07    7.47
   6  -4  -7   21.98    7.18
  -6   4   8  112.68   12.62
  -6   4   8  130.58    9.75
   6  -4  -8  107.68   20.85
  -6   4   9   13.78    9.39
   6  -4  -9   10.42    3.22
  -6   4  10   34.05   10.08
   6  -4 -10    9.09    3.97
  -6   5  -8   16.64    6.34
   6  -5   8   14.07    7.03
   6  -5   8   24.83    5.66
  -6   5  -7  122.90   11.01
   6  -5   7   90.25   11.46
   6  -5   7  111.93   10.47
  -6   5  -6  169.41   11.38
   6  -5   6  189.08   12.65
   6  -5   6  191.76   11.44
  -6   5  -5  152.28    9.48
  -6   5  -5  134.64   10.73
   6  -5   5  163.78   13.66
   6  -5   5  156.01   13.47
  -6   5  -4   15.69    5.01
  -6   5  -4    8.39    4.59
   6  -5   4   10.62    4.87
   6  -5   4   12.58    5.65
  -6   5  -3  115.71   13.00
  -6   5  -3  117.80   15.26
   6  -5   3  205.08   22.51
   6  -5   3  202.35   22.39
  -6   5  -2   59.15    9.97
  -6   5  -2   74.91   13.59
   6  -5   2   53.80    9.62
   6  -5   2   64.31   11.43
  -6   5  -1   43.96   11.01
  -6   5  -1   54.18   14.33
   6  -5   1   34.93    8.51
   6  -5   1   35.03    9.61
  -6   5   0  208.32   29.35
  -6   5   0  220.29   31.23
   6  -5   0  181.96   24.96
   6  -5   0  229.53   31.52
   6  -5   0  216.47   30.29
  -6   5   1  266.30   16.98
  -6   5   1  242.64   34.19
   6  -5  -1  182.02   25.72
   6  -5  -1  232.50   31.70
   6  -5  -1  244.85   36.31
  -6   5   2  759.34   39.53
  -6   5   2  785.70   40.08
   6  -5  -2  715.12   34.57
   6  -5  -2  746.20   36.09
   6  -5  -2  797.72   40.56
  -6   5   3  265.70   14.97
  -6   5   3  251.87   48.57
   6  -5  -3  229.12   24.63
  -6   5   4  104.29   14.25
  -6   5   4   96.87   10.74
   6  -5  -4  143.37   13.74
  -6   5   5   80.64   14.29
  -6   5   5   57.51   10.51
   6  -5  -5   54.59   12.10
  -6   5   6   52.12   10.28
  -6   5   6   44.70    8.03
   6  -5  -6   52.84   10.62
  -6   5   7   86.23   11.80
  -6   5   7   77.13    8.57
   6  -5  -7   76.26   17.57
  -6   5   8    6.08    6.49
  -6   5   8    6.98    3.04
   6  -5  -8    5.72    3.32
  -6   5   9   78.10   13.53
   6  -5  -9   38.04   11.58
  -6   6  -8    8.64    4.87
   6  -6   8   16.10    8.62
   6  -6   8   37.63   11.49
  -6   6  -7   46.52    7.84
   6  -6   7   31.12    9.05
   6  -6   7   25.87    8.45
  -6   6  -6  108.65   10.56
   6  -6   6   77.22    8.03
   6  -6   6   94.24    9.86
  -6   6  -5   42.86    5.90
  -6   6  -5   42.48    7.65
   6  -6   5   44.01    8.22
   6  -6   5   48.60   10.84
  -6   6  -4  483.47   25.66
  -6   6  -4  442.64   25.24
   6  -6   4  473.61   26.58
   6  -6   4  497.61   27.97
  -6   6  -3  203.61   14.39
  -6   6  -3  266.18   19.73
   6  -6   3  286.57   19.42
   6  -6   3  247.22   19.07
  -6   6  -2  532.97   33.69
  -6   6  -2  559.53   36.47
   6  -6   2  474.36   29.46
   6  -6   2  513.59   33.40
  -6   6  -1  168.54   19.59
  -6   6  -1  186.49   21.07
   6  -6   1  186.99   19.71
   6  -6   1  213.35   23.58
  -6   6   0   25.07    7.39
  -6   6   0   62.78   11.66
   6  -6   0   31.36    5.21
   6  -6   0   45.56    9.43
  -6   6   1   15.92    6.30
  -6   6   1    7.92    4.62
   6  -6  -1    9.98    2.36
   6  -6  -1    4.37    4.45
  -6   6   2  297.03   23.19
  -6   6   2  274.25   19.42
   6  -6  -2  286.22   20.28
  -6   6   3  154.67   11.93
  -6   6   3  152.22   11.54
   6  -6  -3  211.65   13.68
  -6   6   4  403.61   26.57
  -6   6   4  400.93   24.64
   6  -6  -4  361.56   22.56
  -6   6   5   30.02   10.58
  -6   6   5   34.13    8.60
   6  -6  -5   29.90    8.13
  -6   6   6   52.18    9.50
  -6   6   6   41.20   10.82
   6  -6  -6   50.19    8.98
  -6   6   7    0.89    7.11
  -6   6   7   17.17    7.40
   6  -6  -7    7.77    2.08
  -6   6   8   14.76   10.37
   6  -6  -8   10.08    3.36
  -6   7  -8   40.04    9.71
   6  -7   8   48.41   13.24
   6  -7   8   81.60    9.48
  -6   7  -7   18.02    8.01
   6  -7   7   15.68    7.99
   6  -7   7   29.06   10.76
  -6   7  -6    1.29    4.55
   6  -7   6    4.05    4.54
   6  -7   6   15.67    7.34
  -6   7  -5   25.54    5.88
  -6   7  -5   15.35    5.53
   6  -7   5   11.04    4.48
   6  -7   5   24.92    8.00
  -6   7  -4  162.50    8.71
  -6   7  -4  187.66   13.30
   6  -7   4  179.07    9.46
   6  -7   4  135.26    9.78
  -6   7  -3  360.85   21.80
  -6   7  -3  350.50   23.15
   6  -7   3  318.04   18.70
   6  -7   3  334.14   21.24
  -6   7  -2  488.74   26.88
  -6   7  -2  491.31   28.35
   6  -7   2  481.07   25.37
  -6   7  -1  136.29   15.75
  -6   7  -1  143.21   23.40
   6  -7   1  175.32    9.94
   6  -7   1  202.62   14.38
  -6   7   0  167.36   11.78
  -6   7   0  195.12   13.84
   6  -7   0  146.43   12.52
  -6   7   1   82.62   14.54
  -6   7   1   96.84   15.61
   6  -7  -1  132.04   10.26
  -6   7   2   66.32   12.78
  -6   7   2   71.37   12.28
   6  -7  -2   74.95   12.35
  -6   7   3  137.70   10.69
  -6   7   3  152.74   10.18
   6  -7  -3  160.14   10.12
  -6   7   4   57.78   11.16
  -6   7   4   61.19    9.95
   6  -7  -4   57.84   10.82
  -6   7   5  109.92   12.43
  -6   7   5  120.21   11.26
   6  -7  -5  124.69   20.26
  -6   7   6  113.20   16.29
  -6   7   6   85.42   10.88
   6  -7  -6   85.85   18.51
  -6   8  -8  216.11   22.64
   6  -8   8  189.99   19.81
   6  -8   8  168.50   18.65
   6  -8   7   70.82    9.59
   6  -8   7   95.86   13.78
  -6   8  -6  152.34   13.25
   6  -8   6  190.28   15.49
   6  -8   6  196.27   17.66
  -6   8  -5   50.07    8.09
  -6   8  -5   60.79   11.44
   6  -8   5   74.14    8.68
   6  -8   5   97.64   11.59
  -6   8  -4   13.52    5.77
  -6   8  -4   15.20    7.18
   6  -8   4   17.73    4.98
  -6   8  -3   45.48   10.50
  -6   8  -3   44.16   10.20
   6  -8   3   36.09    7.52
   6  -8   3   25.35    7.95
  -6   8  -2  172.34   10.79
  -6   8  -2  147.82   12.15
   6  -8   2  147.40    7.01
   6  -8   2  156.83   10.01
  -6   8  -1  354.18   17.04
  -6   8  -1  351.64   16.64
   6  -8   1  407.14   17.84
  -6   8   0  362.72   23.73
  -6   8   0  337.37   23.44
   6  -8   0  383.84   24.72
  -6   8   1  389.70   26.34
  -6   8   1  281.93   19.13
   6  -8  -1  345.26   23.25
  -6   8   2   37.60    8.96
  -6   8   2   36.21    9.19
   6  -8  -2   39.28    8.02
  -6   8   3   45.45   13.13
  -6   8   3   47.66    8.63
   6  -8  -3   44.18   12.02
  -6   8   4    5.04    6.05
  -6   8   4    4.21    4.43
   6  -8  -4    5.86    3.86
  -6   8   5   39.49   12.54
  -6   8   5   40.32    9.89
   6  -8  -5   31.10    9.55
  -6   9  -7  117.27   14.03
   6  -9   7   89.72   11.54
   6  -9   7   82.44   11.93
  -6   9  -6  310.84   31.08
   6  -9   6  306.14   29.05
   6  -9   6  289.26   28.34
  -6   9  -5  382.47   46.81
  -6   9  -5  382.31   48.17
   6  -9   5  360.94   23.64
   6  -9   5  378.64   47.38
  -6   9  -4  199.32   15.23
  -6   9  -4  200.40   16.14
   6  -9   4  190.84   13.59
   6  -9   4  193.62   15.63
  -6   9  -3  123.01   11.65
   6  -9   3  145.78   12.98
  -6   9  -2   -6.57    5.61
   6  -9   2    7.91    7.29
  -6   9  -1    3.67    5.69
   6  -9   1   14.41    5.73
  -6   9   0   90.36    9.82
   6  -9   0  113.97   11.66
  -6   9   1  102.47   11.00
  -6   9   1   96.90   11.30
   6  -9  -1   88.66    9.81
  -6   9   2  125.82   15.77
  -6   9   2  106.45   14.53
   6  -9  -2  186.03   19.13
  -6   9   3  191.98   14.48
  -6  10  -5   15.61    6.69
  -6  10  -5   56.71    9.97
   6 -10   5   25.85   10.87
  -6  10  -4  107.17   10.30
   6 -10   4  103.18    9.84
   6 -10   3  238.28   16.78
  -6  10  -3  206.15   17.19
   6 -10   3  217.82   16.18
   6 -10   2  198.89   15.01
  -6  10  -2  225.75   17.24
   6 -10   2  220.72   16.01
   6 -10   1   67.97    7.19
  -6  10  -1   65.59    8.88
   6 -10   1   89.81   12.04
   6 -10   0   19.34    7.34
  -6  10   0   17.26    8.92
   6 -10   0   23.18    7.26
  -6  10   1   98.81   14.96
   6 -10  -1  121.23   14.25
  -7  -9   6    9.86    5.76
   7   9  -6    9.18    5.34
   7   9  -6   -0.40    6.22
  -7  -9   7   41.83    8.42
   7   9  -7   56.88    9.95
   7   9  -7   60.34   12.59
  -7  -9   8    9.39    6.46
   7   9  -8    4.29    3.49
   7   9  -8   17.99    9.75
  -7  -8   3   13.81    7.00
   7   8  -3   17.53    9.18
   7   8  -3    8.92    7.10
  -7  -8   4   23.02    8.77
   7   8  -4   24.69    9.08
   7   8  -4   17.74   10.15
   7   8  -5    0.30    5.50
   7   8  -5   16.27   11.00
  -7  -8   6    6.74    5.45
   7   8  -6    8.66    7.45
   7   8  -6    1.61    5.92
  -7  -8   7    6.88    5.91
   7   8  -7    8.79    4.93
   7   8  -7   14.13    7.49
  -7  -8   8    9.63    6.17
   7   8  -8   22.46    7.47
   7   8  -8   27.11   11.26
  -7  -8   8   20.13    6.72
  -7  -8   9   67.02   13.17
   7   8  -9   29.54    6.11
   7   8  -9   46.14   11.33
  -7  -8   9   53.76   11.03
  -7  -8  10    5.50    6.00
   7   8 -10    6.22    5.56
  -7  -8  10   -0.91    4.57
  -7  -8  11   28.42   10.32
   7   8 -11   21.16    9.90
  -7  -8  11   14.25    6.29
  -7  -7   1   -3.93    3.17
  -7  -7   1   19.80    7.59
   7   7  -1   -2.75    7.07
  -7  -7   2    8.86    4.06
  -7  -7   2    0.98    5.06
   7   7  -2   10.71    7.16
  -7  -7   3    1.31    4.19
  -7  -7   3    0.37    4.65
   7   7  -3   13.18    7.89
  -7  -7   4   27.73    8.95
  -7  -7   4   10.26    4.67
   7   7  -4   42.30   13.02
  -7  -7   5   18.31    7.89
   7   7  -5   25.06    7.45
  -7  -7   6   18.56    6.49
   7   7  -6   27.25    6.80
   7   7  -6   34.45    8.63
  -7  -7   6   19.74    5.07
   7   7  -7   12.02    5.65
   7   7  -7   17.92    5.98
  -7  -7   7    2.92    3.38
  -7  -7   8   17.57    6.47
   7   7  -8   25.09    5.83
   7   7  -8   12.34    5.47
  -7  -7   8   20.93    6.08
  -7  -7   9   16.52    9.34
   7   7  -9   10.83    3.82
  -7  -7   9   34.81    9.68
  -7  -7  10    7.36    6.37
   7   7 -10   37.64    9.12
  -7  -7  10   27.25   12.19
  -7  -7  11   32.04   10.00
   7   7 -11   22.86    9.49
  -7  -7  11   21.52    8.09
  -7  -7  12    9.44    7.33
   7   7 -12    0.88    4.85
  -7  -7  12    0.20    5.85
  -7  -6  -1    4.40    2.93
  -7  -6  -1   13.34    7.73
   7   6   1   33.20    8.25
  -7  -6   0    9.56    3.50
  -7  -6   0   29.88    9.11
   7   6   0   24.12   11.90
  -7  -6   1    7.67    5.20
  -7  -6   1    8.09    4.66
   7   6  -1   19.86   10.94
  -7  -6   2   15.37    6.23
  -7  -6   2    2.38    4.40
   7   6  -2    3.20    9.16
  -7  -6   3   53.19   11.27
  -7  -6   3   62.03   12.57
   7   6  -3   58.48   13.48
  -7  -6   4   62.99    9.66
  -7  -6   4   68.89   10.61
   7   6  -4   53.50   10.23
  -7  -6   5  130.71   12.63
  -7  -6   5  160.26   10.08
   7   6  -5  118.65   12.75
  -7  -6   5  142.64    8.44
  -7  -6   6   61.56   10.99
  -7  -6   6   60.29    8.65
   7   6  -6   48.20   10.24
  -7  -6   6   57.18    8.35
  -7  -6   7   33.44   10.32
   7   6  -7   20.48    4.77
  -7  -6   7    9.74    4.55
  -7  -6   8   35.19    9.86
   7   6  -8   24.02    6.29
   7   6  -8   26.68    8.77
  -7  -6   8   36.99   10.43
  -7  -6   9    1.39    6.25
   7   6  -9    5.27    2.79
   7   6  -9    2.47    4.97
  -7  -6   9    8.10    5.49
  -7  -6  10   23.20    9.90
   7   6 -10    7.74    4.72
  -7  -6  10   23.40    8.19
  -7  -6  11   37.36    9.81
   7   6 -11    8.03    6.46
  -7  -6  11   22.16   10.24
  -7  -6  12   16.07    9.82
   7   6 -12   39.48   11.24
  -7  -6  12   48.03   13.32
  -7  -5  -2   21.07    5.17
  -7  -5  -2   25.37    9.27
   7   5   2   14.11   10.59
  -7  -5  -1    4.57    2.88
  -7  -5  -1   -2.07    5.16
   7   5   1   25.56    9.88
  -7  -5   0    8.53    4.56
  -7  -5   0   22.79    8.21
   7   5   0   33.49   11.66
  -7  -5   1   15.98    4.91
  -7  -5   1   13.26    5.38
   7   5  -1   12.02    7.80
  -7  -5   2   31.05    6.97
  -7  -5   2   53.97    9.50
   7   5  -2   65.04   11.52
  -7  -5   3   19.94    6.13
  -7  -5   3   17.68    6.96
   7   5  -3   49.40   13.09
   7   5  -3   19.69    4.14
  -7  -5   4   28.51    8.83
  -7  -5   4   25.08    7.26
   7   5  -4   25.99    8.69
   7   5  -4   27.62    6.51
  -7  -5   5  142.75   23.01
  -7  -5   5  116.18   13.78
   7   5  -5  124.64   15.19
   7   5  -5  108.86   12.52
  -7  -5   6   23.76    7.45
  -7  -5   6   22.02    5.40
   7   5  -6   21.41    7.32
   7   5  -6   29.30    6.99
  -7  -5   7  208.99   18.20
  -7  -5   7  189.33   12.33
   7   5  -7  215.57   16.05
   7   5  -7  228.27   15.68
  -7  -5   8   10.08    6.65
   7   5  -8    0.22    2.33
   7   5  -8    7.58    5.62
   7   5  -8    4.09    7.20
  -7  -5   9   59.10   11.87
   7   5  -9   66.04    9.92
   7   5  -9   55.55    8.75
  -7  -5  10   22.04   10.52
   7   5 -10   35.96    8.51
  -7  -5  11    9.67    6.09
   7   5 -11   14.47    5.03
  -7  -5  11   16.44    7.69
  -7  -5  12  100.82   13.11
   7   5 -12   84.88   10.95
  -7  -5  12   81.13   12.12
  -7  -5  13   40.02    8.75
   7   5 -13   30.77   10.27
  -7  -5  13   40.48   10.34
  -7  -4  -3   14.34    5.19
   7   4   3   10.36    7.70
  -7  -4  -2    1.17    2.33
  -7  -4  -2   16.50    7.61
   7   4   2   15.84    8.10
  -7  -4  -1  158.26   12.38
  -7  -4  -1  111.00   20.73
   7   4   1  123.63   13.05
  -7  -4   0   68.18    9.62
  -7  -4   0   74.29   14.77
   7   4   0   72.66   12.53
  -7  -4   1   51.34    9.43
  -7  -4   1   53.25   13.15
   7   4  -1   84.23   15.15
   7   4  -1   52.09   10.41
  -7  -4   2   22.32    6.37
  -7  -4   2   21.70    7.71
   7   4  -2   27.15   11.52
   7   4  -2   19.79    5.64
  -7  -4   3   86.15    9.35
  -7  -4   3   85.21   17.12
   7   4  -3   77.30   11.09
   7   4  -3   69.82   13.07
  -7  -4   4    0.73    5.43
  -7  -4   4   -0.91    3.72
   7   4  -4   15.71    6.63
   7   4  -4   17.31    4.95
  -7  -4   5  208.68   17.03
  -7  -4   5  225.86   23.98
   7   4  -5  227.10   16.93
   7   4  -5  204.90   28.31
  -7  -4   6   20.22    5.75
  -7  -4   6   26.32    6.68
   7   4  -6   48.63   11.91
   7   4  -6   30.38    8.48
  -7  -4   7  279.68   20.56
  -7  -4   7  287.95   18.41
   7   4  -7  249.91   17.79
   7   4  -7  255.18   18.00
  -7  -4   8   52.41   14.01
   7   4  -8   51.80   12.28
   7   4  -8   62.57    9.10
  -7  -4   9  152.41   14.44
   7   4  -9  165.74   13.67
   7   4  -9  133.51   12.26
  -7  -4  10   23.73   10.82
   7   4 -10    8.87    5.02
   7   4 -10   14.37    7.43
  -7  -4  11    8.15    6.45
   7   4 -11    5.18    5.89
   7   4 -11   18.40    5.82
  -7  -4  12   35.42   10.77
   7   4 -12   16.87    6.77
  -7  -4  12   13.65    7.44
  -7  -4  13   34.03    8.05
   7   4 -13   38.65    7.13
  -7  -4  13   44.01   10.79
  -7  -3  -4   32.29   12.37
   7   3   4   29.94    9.40
  -7  -3  -3   10.98    4.35
   7   3   3    8.27    7.37
  -7  -3  -2   39.23    6.42
  -7  -3  -2   44.93   11.04
   7   3   2   66.62   14.89
  -7  -3  -1   18.90    5.33
  -7  -3  -1   10.94    5.18
   7   3   1   21.45    7.97
   7   3   1    4.58    2.19
  -7  -3   0   48.08   10.81
  -7  -3   0   42.65   11.31
   7   3   0   54.40   13.45
   7   3   0   56.23   11.06
  -7  -3   1   21.88    6.39
  -7  -3   1   30.03    8.58
   7   3  -1   31.79    9.20
   7   3  -1   25.02    5.75
  -7  -3   2  177.89   19.62
  -7  -3   2  174.68   35.77
   7   3  -2  179.15   20.91
   7   3  -2  134.36   24.30
  -7  -3   3   29.49    6.52
  -7  -3   3   46.88    9.23
   7   3  -3   35.77    7.65
   7   3  -3   43.60   10.04
  -7  -3   4  155.51   17.85
  -7  -3   4  162.04   27.93
   7   3  -4  196.76   23.10
   7   3  -4  182.18   21.86
  -7  -3   5  137.39   16.82
  -7  -3   5  158.93   19.45
   7   3  -5  119.12   15.37
   7   3  -5  102.20   16.05
  -7  -3   6  264.87   13.20
  -7  -3   6  297.00   15.63
   7   3  -6  302.68   14.20
   7   3  -6  312.21   21.54
  -7  -3   7  106.80   14.19
  -7  -3   7   79.31   11.53
   7   3  -7   94.65   11.12
   7   3  -7   88.39   15.07
  -7  -3   8  113.62   16.66
  -7  -3   8  106.46   11.32
   7   3  -8   85.06   10.51
   7   3  -8  103.47   17.12
  -7  -3   9   46.19   13.56
   7   3  -9   36.34    7.69
   7   3  -9   44.80    8.97
  -7  -3  10   54.59   11.27
   7   3 -10   25.71    6.10
   7   3 -10   45.56    7.80
  -7  -3  11  143.42   15.64
   7   3 -11   91.36    8.36
   7   3 -11   94.92    9.83
  -7  -3  12   20.49   10.68
   7   3 -12    1.37    3.27
   7   3 -12    0.20    5.01
  -7  -3  13   18.70    8.62
   7   3 -13   31.80   10.76
  -7  -3  13   24.60   12.71
  -7  -2  -5   19.09    7.34
   7   2   5   20.82   11.30
   7   2   4   16.91   11.61
  -7  -2  -3   17.94    5.85
   7   2   3   32.57   10.17
  -7  -2  -2    4.27    2.74
  -7  -2  -2   14.21    4.82
   7   2   2   25.37    8.00
   7   2   2   10.66    3.32
  -7  -2  -1   68.67    8.41
  -7  -2  -1   68.38   16.13
   7   2   1   61.59   10.64
   7   2   1   61.65    7.72
  -7  -2   0   65.41    6.99
  -7  -2   0   74.31   16.53
   7   2   0   50.75   11.67
   7   2   0   64.02   12.87
  -7  -2   1   61.47   11.28
  -7  -2   1   57.10   11.65
   7   2  -1   57.55   11.42
   7   2  -1   46.50    7.93
  -7  -2   2    8.56    4.79
  -7  -2   2    2.28    4.05
   7   2  -2   19.48    7.30
   7   2  -2    3.51    2.75
  -7  -2   3   38.09   10.45
  -7  -2   3   45.33   13.32
   7   2  -3   72.15   17.76
   7   2  -3   43.09   11.20
  -7  -2   4  252.63   37.63
  -7  -2   4  268.35   21.18
   7   2  -4  238.75   34.05
   7   2  -4  189.63   28.74
  -7  -2   5   40.93   11.47
  -7  -2   5   40.81   11.58
   7   2  -5  106.07   15.78
   7   2  -5  109.06   20.25
  -7  -2   6  281.01   21.20
   7   2  -6  202.83   22.48
   7   2  -6  219.99   26.77
  -7  -2   7   88.30   19.05
  -7  -2   7   55.90    9.44
   7   2  -7   75.68   13.47
   7   2  -7   59.90   14.72
  -7  -2   8  117.73   14.91
  -7  -2   8   77.63   10.05
   7   2  -8   91.41    9.41
   7   2  -8   72.26   18.16
  -7  -2   9   64.27   14.26
   7   2  -9   25.94    5.60
   7   2  -9   48.07   11.49
  -7  -2  10    1.18    7.52
   7   2 -10   24.54    6.38
   7   2 -10    9.42    5.43
  -7  -2  11   58.47   10.92
   7   2 -11   32.75    7.20
   7   2 -11   32.27    6.66
  -7  -2  12    4.29    6.51
   7   2 -12    7.20    3.17
   7   2 -12   13.83    6.59
  -7  -1  -5   -0.18    2.10
   7   1   5    4.39    7.54
   7   1   4   12.45    7.99
   7   1   4    3.95    2.97
  -7  -1  -3   19.34    4.35
  -7  -1  -3   14.65    6.03
   7   1   3   23.00    7.21
   7   1   3   16.81    5.36
  -7  -1  -2   53.12    8.80
  -7  -1  -2   44.83   11.75
   7   1   2   45.63    8.00
  -7  -1  -1   19.31    5.19
  -7  -1  -1   34.51    8.27
   7   1   1   23.18    7.79
   7   1   1   30.84    7.23
  -7  -1   0   29.23    5.82
  -7  -1   0   28.22    7.27
   7   1   0   54.32   10.66
   7   1   0   59.91   10.47
  -7  -1   1   -1.99    4.09
  -7  -1   1    9.96    4.94
   7   1  -1    4.83    6.91
   7   1  -1   25.96    6.82
  -7  -1   2   41.72   10.39
  -7  -1   2   59.49   14.53
   7   1  -2   61.07   14.23
   7   1  -2   63.06   14.34
  -7  -1   3   86.71   11.22
  -7  -1   3   64.28    8.83
   7   1  -3   62.59    9.00
   7   1  -3   81.22   10.00
  -7  -1   4   16.24    7.84
  -7  -1   4   20.95    4.37
   7   1  -4   11.79    7.93
   7   1  -4   11.42    5.67
  -7  -1   5  373.92   22.37
  -7  -1   5  355.04   18.69
   7   1  -5  409.45   22.72
   7   1  -5  379.88   31.13
  -7  -1   6  113.06   17.51
  -7  -1   6  103.99   15.64
   7   1  -6   71.01   15.83
   7   1  -6   75.33   20.37
  -7  -1   7  107.28   15.85
  -7  -1   7  133.25   18.03
   7   1  -7  156.31   17.50
   7   1  -7  157.38   25.18
  -7  -1   8   47.19   15.18
  -7  -1   8   17.91    5.50
   7   1  -8   25.90    6.79
   7   1  -8   34.10    8.63
  -7  -1   9   -3.51    7.42
   7   1  -9    9.79    4.21
   7   1  -9    5.56    3.54
  -7  -1  10   28.51   11.18
   7   1 -10    3.02    2.69
   7   1 -10   11.70    5.25
  -7  -1  11   13.28    7.04
   7   1 -11    0.15    2.50
   7   1 -11    0.29    4.45
  -7  -1  12   30.47    8.90
   7   1 -12   10.91    4.23
   7   1 -12   18.33    6.35
  -7   0  -6   10.77    3.30
   7   0   6   37.50   12.50
  -7   0  -5   11.37    3.94
   7   0   5   10.59    9.23
   7   0   5   10.07    4.39
  -7   0  -4    8.95    3.44
   7   0   4    4.70    4.48
  -7   0  -3    8.95    3.17
  -7   0  -3    7.36    4.73
   7   0   3    4.16    8.25
   7   0   3    1.13    2.86
  -7   0  -2   54.16   10.92
  -7   0  -2   24.14    7.96
   7   0   2   41.45   10.89
   7   0   2   29.33    6.86
  -7   0  -1  103.56   12.17
  -7   0  -1   75.26   14.19
   7   0   1   92.12   12.27
   7   0   1  103.20   12.68
  -7   0   0  209.55   29.14
  -7   0   0  215.67   30.47
   7   0   0  185.34   27.58
   7   0   0  187.29   26.31
  -7   0   1  311.20   18.43
  -7   0   1  282.68   16.72
   7   0  -1  318.49   19.10
   7   0  -1  320.70   18.18
  -7   0   2   23.11    4.70
  -7   0   2   51.99    8.51
   7   0  -2   51.48    8.84
   7   0  -2   28.15    4.54
  -7   0   3  140.64   15.55
  -7   0   3  168.97   18.00
   7   0  -3  195.39   42.22
   7   0  -3  160.30   17.51
  -7   0   4   38.08    9.27
  -7   0   4   32.74    5.71
   7   0  -4   51.89    8.20
   7   0  -4   67.49    9.15
  -7   0   5   30.69    8.45
  -7   0   5   47.30   10.84
   7   0  -5   38.14    9.75
   7   0  -5   26.81    9.95
  -7   0   6  114.28   15.73
  -7   0   6   94.84   10.53
   7   0  -6  123.32   13.69
   7   0  -6  137.58   22.42
  -7   0   7  175.76   20.82
  -7   0   7  182.57   19.14
   7   0  -7  166.34   17.86
   7   0  -7  158.83   26.66
  -7   0   8   81.25   13.92
  -7   0   8   65.60    7.16
   7   0  -8   70.96    8.59
   7   0  -8   80.32   18.54
  -7   0   9   80.06   13.39
   7   0  -9   80.68   10.08
   7   0  -9   79.96   17.46
  -7   0  10   25.57    6.61
   7   0 -10   46.05    7.09
   7   0 -10   38.98   12.60
  -7   0  11   23.50   10.97
   7   0 -11    8.75    3.73
  -7   0  12   12.76    7.44
   7   0 -12    4.85    5.05
  -7   1  -6   24.78    6.60
   7  -1   6   26.37    7.67
   7  -1   6   11.50    5.53
  -7   1  -5  155.24   24.70
   7  -1   5  210.61   19.35
   7  -1   5  165.07   12.98
  -7   1  -4  103.71   14.55
   7  -1   4   82.12   12.66
   7  -1   4   85.42   11.03
  -7   1  -3   67.10   10.30
  -7   1  -3   60.67   11.15
   7  -1   3   62.69   12.42
   7  -1   3   69.39   11.57
  -7   1  -2   24.61    5.64
  -7   1  -2   27.54    8.44
   7  -1   2   28.16    8.86
   7  -1   2   25.88    6.44
  -7   1  -1    4.15    3.09
  -7   1  -1    5.67    4.95
   7  -1   1    0.63    5.25
   7  -1   1   10.89    5.89
  -7   1   0   19.38    5.09
  -7   1   0   24.90    8.34
   7  -1   0   26.02    7.97
   7  -1   0   12.91    4.82
  -7   1   1  239.22   12.82
  -7   1   1  232.15   12.07
   7  -1  -1  253.74   12.75
   7  -1  -1  243.60   13.22
  -7   1   2  440.79   19.58
  -7   1   2  475.14   20.12
   7  -1  -2  427.95   19.23
   7  -1  -2  435.89   18.94
  -7   1   3  814.41   32.83
  -7   1   3  895.21   34.90
   7  -1  -3  777.34   30.52
   7  -1  -3  808.98   32.07
  -7   1   4  798.20   41.50
  -7   1   4  825.33   41.32
   7  -1  -4  854.09   42.69
   7  -1  -4  911.99   46.58
  -7   1   5  367.98   21.57
  -7   1   5  357.54   18.87
   7  -1  -5  267.82   14.63
   7  -1  -5  331.62   33.48
  -7   1   6  120.22   16.36
  -7   1   6  114.98   12.79
   7  -1  -6  127.96   14.27
   7  -1  -6  145.36   27.49
  -7   1   7   -4.99    7.48
  -7   1   7    3.10    1.84
   7  -1  -7    6.97    3.21
   7  -1  -7    3.94    2.39
  -7   1   8   69.08   15.72
  -7   1   8   43.69    7.01
   7  -1  -8   53.21    8.96
   7  -1  -8   48.59   11.54
  -7   1   9   65.35   14.98
   7  -1  -9   60.61   10.80
   7  -1  -9   46.28   10.96
  -7   1  10   13.16    7.17
   7  -1 -10    8.00    2.39
   7  -1 -10   16.98    6.46
  -7   1  11   81.17   11.38
   7  -1 -11   71.07   19.37
  -7   2  -7    5.76    4.37
   7  -2   7   14.43    7.53
   7  -2   7   16.02    6.76
  -7   2  -6   12.62    5.08
   7  -2   6    7.07    6.26
   7  -2   6    6.11    4.40
  -7   2  -5   10.39    5.24
   7  -2   5   28.49    8.99
  -7   2  -4   18.47    5.98
   7  -2   4   35.84   10.75
   7  -2   4   72.22   11.95
  -7   2  -3  132.40   13.98
  -7   2  -3  148.65   11.96
   7  -2   3  153.51   13.46
   7  -2   3  133.36   15.33
  -7   2  -2  104.42    9.88
  -7   2  -2  125.27   14.69
   7  -2   2  115.39   11.88
   7  -2   2  128.68   13.43
  -7   2  -1  481.20   17.89
  -7   2  -1  554.45   22.75
   7  -2   1  504.10   21.09
   7  -2   1  544.87   20.95
  -7   2   0   23.05    7.36
  -7   2   0   27.07    7.97
   7  -2   0    5.91    5.76
   7  -2   0    5.31    4.17
  -7   2   1   63.02   15.34
  -7   2   1   58.84   13.81
   7  -2  -1   50.76   12.28
   7  -2  -1   46.73   11.22
  -7   2   2   72.41   16.96
  -7   2   2   58.57   13.67
   7  -2  -2   70.57   15.99
   7  -2  -2   71.86   16.49
  -7   2   3   91.69   20.81
  -7   2   3   95.74   14.82
   7  -2  -3  126.94   17.98
   7  -2  -3  141.89   20.62
  -7   2   4  211.57   30.95
  -7   2   4  207.13   28.90
   7  -2  -4  141.64   19.97
   7  -2  -4  115.47   17.27
  -7   2   5   20.83    9.68
  -7   2   5   21.91    5.15
   7  -2  -5   48.28    7.93
   7  -2  -5   87.88   19.61
  -7   2   6  354.56   26.56
  -7   2   6  334.20   21.12
   7  -2  -6  369.08   22.87
   7  -2  -6  366.95   26.65
  -7   2   7   62.32   11.02
  -7   2   7   51.09   10.42
   7  -2  -7   34.74    7.09
   7  -2  -7   35.30    9.00
  -7   2   8   34.29   10.54
  -7   2   8   24.28    4.87
   7  -2  -8   25.92    4.99
   7  -2  -8   35.24    7.93
  -7   2   9   39.77   11.34
   7  -2  -9   13.29    4.84
  -7   2  10   23.73   11.74
   7  -2 -10   39.59    7.34
  -7   2  11   19.76    9.01
   7  -2 -11   12.87    5.54
  -7   3  -7   41.99   10.42
   7  -3   7   19.61    7.51
   7  -3   7   39.55    9.85
  -7   3  -6   22.84    7.37
   7  -3   6   12.90    8.31
   7  -3   6   11.71    6.77
  -7   3  -5    9.77    5.04
   7  -3   5   17.75    7.73
   7  -3   5    4.57    4.05
  -7   3  -4   12.01    5.61
   7  -3   4   13.20    6.24
   7  -3   4   19.86    6.23
  -7   3  -3  158.33    9.15
  -7   3  -3  194.66   15.06
   7  -3   3  177.97   13.45
   7  -3   3  176.03   13.03
  -7   3  -2  670.99   41.01
  -7   3  -2  650.76   40.90
   7  -3   2  583.29   37.07
   7  -3   2  627.66   39.40
  -7   3  -1  669.61   24.28
  -7   3  -1  628.31   24.15
   7  -3   1  670.39   24.62
   7  -3   1  639.69   24.92
  -7   3   0  381.98   20.61
  -7   3   0  379.54   21.90
   7  -3   0  292.25   16.56
   7  -3   0  307.25   18.47
  -7   3   1  634.83   33.45
  -7   3   1  608.80   32.37
   7  -3  -1  656.36   33.49
   7  -3  -1  672.92   35.22
  -7   3   2   55.33   13.86
  -7   3   2   60.87   14.05
   7  -3  -2   22.84    6.31
   7  -3  -2   34.38    9.69
  -7   3   3   22.93    7.81
  -7   3   3   43.06    8.07
   7  -3  -3   33.64    5.51
   7  -3  -3   43.38    7.20
   7  -3  -3   45.90    9.98
  -7   3   4   61.34   12.04
  -7   3   4   52.44    8.96
   7  -3  -4   45.13    7.45
  -7   3   4   51.90    8.03
   7  -3  -4   50.07    9.82
  -7   3   5  368.86   24.03
   7  -3  -5  397.12   24.16
   7  -3  -5  409.48   27.21
  -7   3   6  305.18   21.48
  -7   3   6  326.79   18.05
   7  -3  -6  249.22   13.16
  -7   3   7  235.68   13.91
  -7   3   7  234.74   10.16
   7  -3  -7  262.12   17.66
  -7   3   8  204.53   16.10
   7  -3  -8  206.70   35.67
  -7   3   9   16.88   10.14
   7  -3  -9    6.04    4.87
  -7   3  10   25.16   11.14
   7  -3 -10   -0.83    4.31
  -7   4  -7   71.83    9.46
   7  -4   7   96.78   12.53
   7  -4   7   77.31   10.52
  -7   4  -6   53.99    8.68
   7  -4   6   37.02    9.95
   7  -4   6   56.41    9.05
  -7   4  -5  113.51   11.32
   7  -4   5  113.10   12.11
   7  -4   5  109.84   10.11
  -7   4  -4   13.87    3.39
  -7   4  -4   29.83    8.92
   7  -4   4   32.04    9.21
   7  -4   4   44.83    9.96
  -7   4  -3  100.06   11.31
  -7   4  -3   94.52   12.53
   7  -4   3   99.43   14.05
   7  -4   3   83.71   12.18
  -7   4  -2   15.71    5.27
  -7   4  -2    7.92    4.93
   7  -4   2   24.96    7.80
   7  -4   2   19.83    8.30
  -7   4  -1  178.10   16.96
  -7   4  -1  162.78   15.91
   7  -4   1  181.81   34.52
   7  -4   1  196.07   14.52
  -7   4   0  494.48   19.27
  -7   4   0  488.30   20.25
   7  -4   0  500.64   19.28
   7  -4   0  539.48   22.48
  -7   4   1  325.06   14.89
  -7   4   1  323.27   14.38
   7  -4  -1  313.15   12.83
   7  -4  -1  329.12   15.40
  -7   4   2  508.57   21.02
  -7   4   2  529.06   20.84
   7  -4  -2  505.40   18.16
   7  -4  -2  490.27   20.48
  -7   4   3  551.09   36.33
  -7   4   3  538.70   34.35
   7  -4  -3  603.41   36.36
   7  -4  -3  619.73   38.84
  -7   4   4   62.80   14.21
  -7   4   4   55.41   12.39
   7  -4  -4   42.89    8.48
  -7   4   5   28.56    6.88
   7  -4  -5   46.48   10.81
  -7   4   6   10.12    7.15
  -7   4   6   20.98    5.52
   7  -4  -6    9.10    4.22
  -7   4   7    2.21    6.31
  -7   4   7   17.76    5.65
   7  -4  -7   23.03    7.89
  -7   4   8   42.89   12.16
   7  -4  -8   33.16   11.00
  -7   4   9   34.32   10.12
   7  -4  -9   33.77   12.24
  -7   5  -7   10.95    6.97
   7  -5   7   28.62   10.65
   7  -5   7    6.23    5.23
  -7   5  -6   18.39    7.94
   7  -5   6   25.01    9.84
   7  -5   6   21.97    8.53
  -7   5  -5  268.91   20.45
   7  -5   5  243.91   18.47
   7  -5   5  229.04   17.00
  -7   5  -4  115.58   20.37
  -7   5  -4  121.12    9.35
   7  -5   4  139.08    9.78
   7  -5   4  122.68    9.75
  -7   5  -3  256.26   15.70
  -7   5  -3  315.63   21.80
   7  -5   3  217.06   14.23
   7  -5   3  219.85   16.58
  -7   5  -2   97.65   11.91
  -7   5  -2   91.40   12.41
   7  -5   2  114.11   13.58
   7  -5   2  119.35   14.72
  -7   5  -1   52.15   11.71
  -7   5  -1   17.06    7.08
   7  -5   1    9.56    4.74
   7  -5   1    6.02    5.19
  -7   5   0   73.73    9.63
  -7   5   0   65.84    9.07
   7  -5   0   68.45    7.44
   7  -5   0   65.90    8.90
  -7   5   1   34.79    9.04
  -7   5   1   37.28    8.25
   7  -5  -1   33.20    7.49
   7  -5  -1   35.39    9.29
  -7   5   2  333.36   19.96
  -7   5   2  365.92   21.56
   7  -5  -2  362.55   18.68
   7  -5  -2  374.12   21.37
  -7   5   3  238.09   17.81
  -7   5   3  228.71   15.48
   7  -5  -3  202.95   13.39
  -7   5   4  126.63   12.47
  -7   5   4  142.57   11.52
   7  -5  -4  131.57   12.27
  -7   5   5  203.17   12.33
  -7   5   5  202.58   10.46
   7  -5  -5  194.53   11.29
  -7   5   6   28.67    9.38
  -7   5   6   20.45    5.51
   7  -5  -6   21.01    6.10
  -7   5   7   33.13   11.34
  -7   5   7   26.03    7.79
   7  -5  -7   32.98    7.32
  -7   5   8    6.30    6.51
   7  -5  -8    0.85    2.09
  -7   6  -7   77.65    9.47
   7  -6   7   53.60    9.80
   7  -6   7   65.30    8.57
  -7   6  -6    4.05    4.63
   7  -6   6   33.35    8.02
   7  -6   6   12.23    5.80
   7  -6   5   15.26    5.28
   7  -6   5   41.96   11.33
  -7   6  -4  210.21   14.07
  -7   6  -4  213.71   15.41
   7  -6   4  207.82   14.99
   7  -6   4  241.37   17.01
  -7   6  -3  387.92   16.24
  -7   6  -3  425.33   18.52
   7  -6   3  417.03   16.77
   7  -6   3  419.04   19.87
  -7   6  -2  255.96   16.93
  -7   6  -2  268.57   18.03
   7  -6   2  228.55   14.25
   7  -6   2  257.18   18.39
  -7   6  -1  152.03   11.75
  -7   6  -1  150.69   12.90
   7  -6   1  185.40   12.28
   7  -6   1  138.80   11.07
  -7   6   0  137.21   12.30
  -7   6   0  113.45   19.99
   7  -6   0   93.16   13.84
   7  -6   0  126.48   11.37
  -7   6   1   12.41    5.29
  -7   6   1    1.86    4.80
   7  -6  -1    5.19    2.14
  -7   6   2   33.68    9.32
  -7   6   2   19.25    5.27
   7  -6  -2   35.24    8.74
  -7   6   3   65.16   11.66
  -7   6   3   84.94   11.89
   7  -6  -3   78.76   12.03
  -7   6   4  259.42   19.75
  -7   6   4  271.87   18.32
   7  -6  -4  288.84   19.30
  -7   6   5  256.02   19.67
  -7   6   5  249.29   18.20
   7  -6  -5  262.90   20.57
  -7   6   6  144.85   14.51
  -7   6   6   94.08    9.54
   7  -6  -6  134.01   20.19
  -7   6   7   15.43    7.00
  -7   6   7   15.83    5.34
   7  -6  -7   11.35    3.97
  -7   7  -7   53.97    9.38
   7  -7   7   14.96    5.41
   7  -7   7   16.31    7.02
  -7   7  -6  132.46   15.23
   7  -7   6  127.62   15.09
   7  -7   6  159.22   18.76
   7  -7   5    7.26    4.17
   7  -7   5   10.44    5.57
  -7   7  -4   13.51    4.25
  -7   7  -4    0.86    4.11
   7  -7   4    9.96    3.77
   7  -7   4    5.91    5.05
  -7   7  -3   83.48    8.85
  -7   7  -3   77.17    8.97
   7  -7   3   68.70   12.53
   7  -7   3   65.52   13.26
  -7   7  -2   85.81    8.48
  -7   7  -2   72.20    9.46
   7  -7   2   92.41    8.26
   7  -7   2   99.14    9.50
  -7   7  -1  693.67  109.56
  -7   7  -1  635.22   38.85
   7  -7   1  626.95   36.21
  -7   7   0  227.50   15.85
  -7   7   0  228.63   16.39
   7  -7   0  220.13   15.82
  -7   7   1  375.84   25.70
  -7   7   1  332.53   22.77
   7  -7  -1  334.36   22.15
  -7   7   2   66.07   13.44
  -7   7   2   81.99    9.31
   7  -7  -2   67.30   13.07
  -7   7   3   15.22    6.75
  -7   7   3   20.37    5.65
   7  -7  -3   25.06    7.72
  -7   7   4   23.82   10.72
  -7   7   4    3.75    4.57
   7  -7  -4    5.17    4.83
  -7   7   5   57.41   12.60
  -7   7   5   49.59    9.56
   7  -7  -5   38.91    8.49
  -7   7   6   42.61   11.61
  -7   7   6   67.48   10.32
   7  -7  -6   37.41   11.07
  -7   8  -6  173.26   18.98
   7  -8   6  179.07   18.91
   7  -8   6  150.44   17.43
   7  -8   5  152.08   16.10
   7  -8   5  163.12   19.06
  -7   8  -4  141.13   11.05
  -7   8  -4  170.49   15.74
   7  -8   4  150.19   11.66
   7  -8   4  169.33   15.66
  -7   8  -3   81.67    9.57
  -7   8  -3   90.97   11.30
   7  -8   3   88.89    8.45
   7  -8   3   72.32    9.03
  -7   8  -2   18.51    6.22
  -7   8  -2    6.68    7.17
   7  -8   2    5.58    5.38
  -7   8  -1   14.12    5.65
  -7   8  -1    0.13    5.41
   7  -8   1    8.70    5.26
  -7   8   0  136.95   11.34
  -7   8   0  177.25   14.58
   7  -8   0  180.35   16.13
  -7   8   1  278.59   22.16
  -7   8   1  260.12   20.25
   7  -8  -1  279.24   21.16
  -7   8   2  274.60   21.58
  -7   8   2  268.64   20.39
   7  -8  -2  269.38   21.10
  -7   8   3  257.27   26.17
  -7   8   3  266.94   26.79
   7  -8  -3  264.30   26.76
  -7   8   4   92.73   11.33
  -7   8   4   95.90   11.17
   7  -8  -4   92.22    9.17
   7  -9   5   12.56    4.02
   7  -9   5   11.31    6.14
  -7   9  -4  129.75    9.91
  -7   9  -4  118.21   11.20
   7  -9   4  159.88   15.03
  -7   9  -3  154.56   12.46
  -7   9  -3  215.71   17.08
   7  -9   3  145.69   13.40
  -7   9  -2  136.62   14.61
  -7   9  -2  194.45   22.11
   7  -9   2  161.26   18.62
  -7   9  -1   44.28   10.53
  -7   9  -1   51.99   11.31
   7  -9   1   45.99   10.18
  -7   9   0   35.42   11.31
  -7   9   0   35.50   10.03
   7  -9   0   34.78    8.98
  -7   9   1   13.64    6.06
  -7   9   1   18.56    6.25
   7  -9  -1   28.66    8.15
  -7   9   2   22.81    9.12
  -7   9   2   43.86    8.90
   7  -9  -2   38.46    7.71
  -8  -8   7    9.88    6.02
   8   8  -7   16.67    8.47
   8   8  -7   19.13   10.61
  -8  -7   3   39.86    8.10
  -8  -7   3   66.17   11.73
   8   7  -3    9.64    7.26
  -8  -7   4    9.54    6.72
  -8  -7   4    3.04    4.63
   8   7  -4   10.42    9.97
  -8  -7   5   33.14    9.22
  -8  -7   5   15.54    6.76
   8   7  -5    7.09    7.05
   8   7  -6   68.54   10.83
   8   7  -6   31.07    8.39
  -8  -7   7   18.25    7.22
   8   7  -7    4.65    4.02
   8   7  -7   10.15    5.99
   8   7  -8   13.07    5.71
  -8  -7   8   15.12    6.00
  -8  -7   9    5.95    6.17
   8   7  -9    8.33    5.80
  -8  -7   9    8.08    7.66
  -8  -7  10   24.99   11.85
   8   7 -10   30.05   11.49
  -8  -7  10   32.45   12.45
  -8  -6   1    9.51    5.20
  -8  -6   1    2.57    4.82
   8   6  -1   11.87    7.76
  -8  -6   2    1.79    3.78
  -8  -6   2    3.78    4.38
   8   6  -2   16.45    7.77
  -8  -6   3   -0.27    4.14
  -8  -6   3    7.32    4.94
  -8  -6   4   12.69    6.83
  -8  -6   4    5.15    4.36
   8   6  -4   36.12   12.52
  -8  -6   5   33.17   10.31
  -8  -6   5   24.93    7.61
   8   6  -5   32.68   10.32
  -8  -6   6    8.62    5.42
  -8  -6   6    2.00    3.25
   8   6  -6    7.61    5.63
  -8  -6   7   -0.18    6.13
  -8  -6   7   12.36    4.58
   8   6  -7   18.21    9.13
  -8  -6   8   -0.64    6.15
   8   6  -8   25.22    6.39
   8   6  -8   15.61    6.08
  -8  -6   8   24.16    8.20
  -8  -6   9   31.33   11.39
   8   6  -9    7.37    5.17
  -8  -6   9   27.61   10.04
  -8  -6  10   12.62    7.01
  -8  -6  10    2.85    5.57
  -8  -6  11    5.97    6.73
   8   6 -11    4.14    4.40
  -8  -6  11    0.76    5.79
  -8  -5   0   37.44    8.53
  -8  -5   0   33.84    8.34
   8   5   0   26.13    8.63
  -8  -5   1   19.08    6.96
  -8  -5   1   22.91    9.09
  -8  -5   2   13.42    5.70
  -8  -5   2   11.04    6.90
   8   5  -2   10.59    7.21
  -8  -5   3   17.56    6.78
  -8  -5   3   22.72    6.30
   8   5  -3   24.12    7.65
  -8  -5   4   15.83    5.96
  -8  -5   4    8.11    5.63
   8   5  -4   19.25    9.70
   8   5  -4    6.36    2.85
  -8  -5   5   21.97    6.75
  -8  -5   5   28.61    7.53
   8   5  -5   30.97    9.82
   8   5  -5   19.82    5.93
  -8  -5   6  154.84   14.70
  -8  -5   6  122.88   10.05
   8   5  -6  149.12   15.80
   8   5  -6  134.36   10.63
  -8  -5   7  284.15   21.19
  -8  -5   7  333.90   20.58
   8   5  -7  351.98   23.72
   8   5  -7  325.89   20.73
  -8  -5   8  127.63   12.29
   8   5  -8  115.82   11.07
   8   5  -8  118.43   10.40
  -8  -5   9   22.28    7.64
   8   5  -9   54.82    8.14
   8   5  -9   52.04    9.13
  -8  -5  10   45.68   11.05
   8   5 -10   10.76    5.42
   8   5 -10   45.42    8.15
  -8  -5  11    6.13    6.68
   8   5 -11    1.47    4.33
  -8  -5  12    6.01    7.08
   8   5 -12   11.82    4.78
  -8  -5  12    6.97    6.31
  -8  -4  -1    0.85    2.33
  -8  -4  -1   16.71    7.20
   8   4   1   12.77   10.51
  -8  -4   0   20.36    6.59
  -8  -4   0   33.46    9.67
   8   4   0   43.50   10.87
  -8  -4   1   40.65    8.11
  -8  -4   1   53.31   12.11
   8   4  -1   42.80    9.80
  -8  -4   2   64.72   12.34
  -8  -4   2   69.82   18.76
  -8  -4   3   21.44    7.04
  -8  -4   3    7.59    4.76
   8   4  -3   23.18   10.83
   8   4  -3   17.28    4.90
  -8  -4   4   19.95    7.08
  -8  -4   4   29.11    8.99
   8   4  -4   23.36    8.97
   8   4  -4   23.75    7.70
  -8  -4   5   24.35    6.06
  -8  -4   5   46.69    8.74
   8   4  -5   64.62   12.32
   8   4  -5   45.05   10.70
  -8  -4   6   34.66   10.84
  -8  -4   6   12.45    3.23
   8   4  -6    5.22    8.27
   8   4  -6    8.88    3.25
  -8  -4   7   43.52    8.82
  -8  -4   7   46.30    6.56
   8   4  -7   41.68    9.62
   8   4  -7   48.04    9.37
  -8  -4   8    8.95    6.05
  -8  -4   8    9.08    3.35
   8   4  -8   15.85    7.79
   8   4  -8    7.09    4.27
  -8  -4   9    8.95    6.13
   8   4  -9   13.26    5.45
   8   4  -9   10.70    4.67
  -8  -4  10   82.59   10.40
   8   4 -10  108.30   11.19
   8   4 -10   81.77    9.72
  -8  -4  11   -6.07    7.26
   8   4 -11   19.81    7.96
   8   4 -11    9.32    5.27
  -8  -4  12   47.85   11.83
   8   4 -12   27.90    9.84
   8   4 -12   15.99    7.00
  -8  -3  -2   14.92    5.38
   8   3   2   25.79    8.65
  -8  -3  -1    9.68    3.87
  -8  -3  -1    4.09    5.13
   8   3   1   13.94    7.30
  -8  -3   0   10.61    4.58
  -8  -3   0   10.19    3.03
   8   3   0   59.44   12.29
  -8  -3   1   13.23    4.44
  -8  -3   1   18.56    6.97
   8   3  -1   32.22   11.37
   8   3  -1   12.63    5.76
  -8  -3   2   42.11    7.47
  -8  -3   2   24.30    9.80
   8   3  -2   32.95    9.25
   8   3  -2   42.87    9.65
  -8  -3   3   44.66    9.72
  -8  -3   3   32.53    9.81
   8   3  -3   64.68   13.93
   8   3  -3   30.32    8.68
  -8  -3   4  197.68   14.75
  -8  -3   4  186.51   18.47
   8   3  -4  204.59   17.72
   8   3  -4  164.74   17.81
  -8  -3   5   24.48    8.38
  -8  -3   5   18.35    6.43
   8   3  -5   17.20    7.86
   8   3  -5   16.89    6.53
  -8  -3   6   90.31   15.34
  -8  -3   6   74.41   13.40
   8   3  -6   78.25   13.13
   8   3  -6   77.18   17.69
  -8  -3   7   51.54   10.52
  -8  -3   7   30.92    7.75
   8   3  -7   16.01    6.81
   8   3  -7   30.88   10.82
  -8  -3   8   11.40    6.94
  -8  -3   8    6.69    2.49
   8   3  -8   13.75    5.09
   8   3  -8    7.82    4.99
  -8  -3   9   41.01   10.75
   8   3  -9   33.37    8.66
   8   3  -9   56.73   13.38
  -8  -3  10   12.31    6.56
   8   3 -10   34.35    9.79
   8   3 -10   39.36   10.42
  -8  -3  11   41.68    9.71
   8   3 -11   17.76    5.53
   8   3 -11   24.58    7.99
  -8  -3  12   49.97   14.77
   8   3 -12   64.87    7.73
   8   3 -12   73.24   11.54
  -8  -2  -3   -1.30    4.73
   8   2   3   10.63    7.48
  -8  -2  -2   52.75   11.10
   8   2   2   46.21   11.23
  -8  -2  -1   11.21    3.78
  -8  -2  -1   11.72    4.25
   8   2   1    2.15    1.99
  -8  -2   0   41.82    8.56
  -8  -2   0   55.55   12.69
   8   2   0   37.98    8.32
  -8  -2   1   79.16   12.85
  -8  -2   1   63.45   17.02
   8   2  -1   82.01   14.54
   8   2  -1   75.71   11.93
  -8  -2   2  144.69   22.20
  -8  -2   2  132.05   31.52
   8   2  -2  121.15   16.01
   8   2  -2  133.79   14.97
  -8  -2   3   21.54    8.06
  -8  -2   3   10.28    5.55
   8   2  -3   21.42    7.21
   8   2  -3   15.08    6.27
  -8  -2   4   12.55    5.49
  -8  -2   4    9.56    3.21
   8   2  -4   13.40    6.16
   8   2  -4    7.68    3.59
  -8  -2   5   51.72   11.86
  -8  -2   5   39.31   11.71
   8   2  -5   83.88   11.78
   8   2  -5   81.98   15.12
  -8  -2   6  158.13   12.88
  -8  -2   6  126.22   21.53
   8   2  -6  155.70   12.14
   8   2  -6  123.39   24.09
  -8  -2   7   39.28    9.84
   8   2  -7   60.96   11.19
   8   2  -7   67.94   15.02
  -8  -2   8   20.21   10.32
  -8  -2   8    3.57    2.25
   8   2  -8   29.46    7.28
   8   2  -8   18.87    6.79
  -8  -2   9   57.07   14.01
   8   2  -9   30.15    7.01
   8   2  -9   29.82    8.37
  -8  -2  10    8.41    6.51
   8   2 -10    8.35    4.69
   8   2 -10   12.90    6.09
  -8  -2  11   16.60   10.46
   8   2 -11    4.57    2.95
   8   2 -11   10.75    5.58
  -8  -2  12   32.96   13.93
   8   2 -12   13.20    5.54
   8   2 -12   14.96    5.61
  -8  -1  -4   15.20    5.14
   8   1   4   13.76    7.61
  -8  -1  -3   11.29    5.81
  -8  -1  -2   12.62    3.78
  -8  -1  -2   11.29    4.76
   8   1   2   13.59    6.76
   8   1   2   20.14    5.86
  -8  -1  -1    8.81    3.69
  -8  -1  -1    8.58    3.84
   8   1   1   15.20    6.71
   8   1   1    0.00    2.99
  -8  -1   0   53.93    9.00
  -8  -1   0   49.35   15.22
   8   1   0   56.30   13.09
   8   1   0   59.78   10.42
  -8  -1   1   82.99   11.48
  -8  -1   1   69.89   16.78
   8   1  -1  101.11   14.51
   8   1  -1   85.09   10.65
  -8  -1   2   27.06    7.82
  -8  -1   2   13.15    3.96
   8   1  -2    8.95    5.61
   8   1  -2   27.55    7.03
  -8  -1   3  142.59   15.03
  -8  -1   3  136.57   26.06
   8   1  -3  131.73   13.03
   8   1  -3  157.78   15.06
  -8  -1   4   72.54   10.59
  -8  -1   4   51.33   12.85
   8   1  -4   37.26    9.53
   8   1  -4   53.31   15.16
  -8  -1   5   38.93   10.05
  -8  -1   5   23.19    6.59
   8   1  -5   27.63    7.49
   8   1  -5   38.36    9.03
  -8  -1   6   29.85    8.56
  -8  -1   6   38.18    9.33
   8   1  -6   48.31   10.51
   8   1  -6   29.62    8.30
  -8  -1   7   28.20    8.09
  -8  -1   7   15.94    3.51
   8   1  -7   27.81    6.12
   8   1  -7   39.25    9.11
  -8  -1   8  107.71   18.08
  -8  -1   8  125.31    9.97
   8   1  -8  119.97    7.32
   8   1  -8  117.95   25.64
  -8  -1   9   41.32   11.27
   8   1  -9   30.45    6.59
   8   1  -9   10.67    4.79
  -8  -1  10   18.76    7.92
   8   1 -10   32.71    7.85
   8   1 -10   41.78   14.35
  -8  -1  11    8.88    7.11
   8   1 -11    3.08    2.53
   8   1 -11   33.70    9.80
  -8   0  -4   20.02    6.97
   8   0   4    1.98    6.01
   8   0   4    5.83    2.66
  -8   0  -3   37.87   13.45
   8   0   3   67.73   10.18
   8   0   3   77.58    8.35
  -8   0  -2   10.15    3.20
  -8   0  -2    9.88    4.74
   8   0   2   18.88    7.04
   8   0   2   11.06    4.69
  -8   0  -1   22.83    5.13
  -8   0  -1   30.16    8.07
   8   0   1   15.74    6.69
   8   0   1   24.16    6.09
  -8   0   0  102.70   16.12
  -8   0   0   86.00   14.27
   8   0   0  108.35   17.68
   8   0   0  114.51   19.81
  -8   0   1   26.63    6.88
  -8   0   1   20.97    7.78
   8   0  -1   14.55    5.90
   8   0  -1    5.24    3.94
  -8   0   2  177.17   16.83
  -8   0   2  167.13   16.67
   8   0  -2  135.68   13.67
   8   0  -2  136.16   13.05
  -8   0   3  355.88   24.20
  -8   0   3  353.32   23.93
   8   0  -3  371.80   24.38
   8   0  -3  363.78   24.15
  -8   0   4   58.85   13.45
  -8   0   4   89.14   10.00
   8   0  -4   41.68   10.01
   8   0  -4   33.68    9.44
  -8   0   5  135.83   15.23
  -8   0   5  152.34   13.95
   8   0  -5  185.95   14.24
   8   0  -5  157.71   25.36
  -8   0   6    0.41    6.22
  -8   0   6    5.06    2.72
   8   0  -6   -1.38    3.55
   8   0  -6    8.94    4.44
  -8   0   7   22.07    8.08
  -8   0   7   29.34    5.48
   8   0  -7   21.38    5.64
   8   0  -7   36.33    8.98
  -8   0   8   65.86   11.42
   8   0  -8   71.29    9.33
   8   0  -8   58.44   11.19
  -8   0   9   22.60   10.39
   8   0  -9   20.15    4.85
   8   0  -9   18.11    5.99
  -8   0  10  147.62   16.46
   8   0 -10  110.41    8.99
   8   0 -10  108.48   20.56
  -8   0  11   54.63   11.45
   8   0 -11   64.83   19.63
  -8   1  -5    6.39    4.77
   8  -1   5    7.07    6.63
   8  -1   5    3.60    3.35
  -8   1  -4   17.28    7.72
   8  -1   4   38.89    8.69
   8  -1   4   16.12    6.16
  -8   1  -3  142.60   13.12
   8  -1   3   90.04   12.00
   8  -1   3  115.53    9.50
  -8   1  -2  118.62    8.57
  -8   1  -2  134.70   12.21
   8  -1   2   97.01   11.45
   8  -1   2  111.77    9.76
  -8   1  -1   77.95   12.03
  -8   1  -1   75.55   13.26
   8  -1   1   76.00   13.43
   8  -1   1   74.46   12.16
  -8   1   0   26.91    7.25
  -8   1   0   28.20    7.96
   8  -1   0   42.11   10.66
   8  -1   0   33.78    8.80
  -8   1   1   49.95   11.21
  -8   1   1   63.07   13.90
   8  -1  -1   68.95    9.13
   8  -1  -1   53.92   11.58
  -8   1   2  201.92   15.63
  -8   1   2  212.50   15.39
   8  -1  -2  213.75   15.79
   8  -1  -2  213.26   16.07
  -8   1   3   42.40   10.10
  -8   1   3   32.66    7.98
   8  -1  -3   63.54   13.21
   8  -1  -3   55.43   11.83
  -8   1   4   97.70   10.84
  -8   1   4  104.56   10.33
   8  -1  -4   91.54    9.82
   8  -1  -4   97.56   11.17
  -8   1   5  174.53   13.50
  -8   1   5  208.08   13.26
   8  -1  -5  202.07   12.39
   8  -1  -5  224.71   15.37
  -8   1   6  139.19   16.58
  -8   1   6  133.25   14.54
   8  -1  -6  123.29   13.55
   8  -1  -6  112.39   26.85
  -8   1   7   70.77   13.74
  -8   1   7   60.69    9.75
   8  -1  -7   58.73    9.48
   8  -1  -7   59.13   15.62
  -8   1   8    8.09    7.09
   8  -1  -8    6.32    3.12
   8  -1  -8   17.79    4.94
  -8   1   9   13.65    7.26
   8  -1  -9   16.64    4.60
   8  -1  -9   25.05    7.59
  -8   1  10   41.87   12.73
   8  -1 -10   15.14    4.88
  -8   1  11   10.13    8.08
   8  -1 -11   11.76    5.13
  -8   2  -5   12.40    4.98
   8  -2   5   20.48    9.90
   8  -2   5   12.53    4.89
  -8   2  -4   43.59   12.80
   8  -2   4   33.37   10.76
   8  -2   4   22.51    6.15
  -8   2  -3    7.77    4.63
   8  -2   3    4.35    5.25
   8  -2   3   10.30    5.60
  -8   2  -2  127.35    7.33
  -8   2  -2  164.75   12.92
   8  -2   2  130.41   11.90
   8  -2   2  139.71    9.93
  -8   2  -1   54.46    9.38
  -8   2  -1   68.61   12.44
   8  -2   1   92.64   16.10
   8  -2   1   66.50   11.84
  -8   2   0  216.26   13.80
  -8   2   0  214.52   14.38
   8  -2   0  224.44   17.19
   8  -2   0  182.58   13.40
  -8   2   1  257.90   16.20
  -8   2   1  266.85   17.34
   8  -2  -1  281.61   17.32
   8  -2  -1  263.64   17.05
  -8   2   2   18.18    8.42
  -8   2   2   20.46    6.67
   8  -2  -2   28.19    8.15
   8  -2  -2    4.11    4.34
  -8   2   3  120.93   12.60
  -8   2   3  128.81   13.56
   8  -2  -3   80.05    8.28
   8  -2  -3   86.24    9.56
  -8   2   4  215.97   14.60
  -8   2   4  253.93   15.52
   8  -2  -4  251.89   14.47
   8  -2  -4  264.75   16.72
  -8   2   5  128.19   20.27
  -8   2   5   78.79    9.75
   8  -2  -5  102.55   11.43
   8  -2  -5  112.42   13.71
  -8   2   6  361.61   24.21
  -8   2   6  340.22   20.16
   8  -2  -6  333.85   19.19
   8  -2  -6  352.83   22.49
  -8   2   7  231.75   18.54
  -8   2   7  234.11   14.95
   8  -2  -7  208.44   12.90
   8  -2  -7  196.42   36.48
  -8   2   8   93.80   10.54
   8  -2  -8   68.81   17.27
  -8   2   9   53.98   10.32
   8  -2  -9   73.70   17.63
  -8   2  10   24.24   10.88
   8  -2 -10    7.82    3.13
  -8   3  -5    3.15    4.53
   8  -3   5   13.42    6.75
   8  -3   5   12.82    6.32
  -8   3  -4   18.90    6.20
   8  -3   4   45.07   12.08
   8  -3   4   23.51    7.97
  -8   3  -3   43.23    9.96
   8  -3   3   54.05   11.83
   8  -3   3   50.90   10.25
  -8   3  -2   89.47   11.07
  -8   3  -2   84.79   13.02
   8  -3   2  100.80   14.56
   8  -3   2  109.69   15.62
  -8   3  -1    9.74    3.76
  -8   3  -1    2.49    6.41
   8  -3   1   42.42    9.48
   8  -3   1   34.27    8.29
  -8   3   0  108.39   12.81
  -8   3   0  127.15   15.33
   8  -3   0  130.15   15.58
   8  -3   0  110.18   14.14
  -8   3   1  104.74   12.44
  -8   3   1  115.10   14.43
   8  -3  -1  127.25   15.14
   8  -3  -1  140.53   17.14
  -8   3   2  173.58   14.27
  -8   3   2  123.47   15.09
   8  -3  -2  113.14   12.98
   8  -3  -2  121.17   14.33
  -8   3   3   56.22   12.33
  -8   3   3   77.45    9.93
   8  -3  -3  120.47   13.67
   8  -3  -3  129.48   16.40
  -8   3   4   18.26    6.73
  -8   3   4    5.67    4.72
   8  -3  -4    4.78    2.06
   8  -3  -4   12.09    5.26
  -8   3   5   42.18   10.02
  -8   3   5   52.12    9.50
   8  -3  -5   29.26    5.17
   8  -3  -5   53.93   11.59
  -8   3   6   51.33   12.23
  -8   3   6   57.17    8.00
   8  -3  -6   32.43    7.21
  -8   3   7   43.01   10.59
  -8   3   7   38.55    6.63
  -8   3   8   10.40    7.71
   8  -3  -8   -0.37    5.55
  -8   3   9   14.70    7.59
   8  -3  -9   16.55    7.95
  -8   4  -6   27.96   10.26
   8  -4   6    7.46    5.55
   8  -4   6    9.13    6.31
   8  -4   5  127.57   14.43
   8  -4   5  175.82   19.18
  -8   4  -4   55.05    7.00
   8  -4   4   16.73    6.46
   8  -4   4   27.78    9.23
  -8   4  -3   28.63    5.53
  -8   4  -3   13.16    5.11
   8  -4   3   39.00    7.79
   8  -4   3   48.60    9.23
  -8   4  -2   49.02    9.38
  -8   4  -2   51.21   11.28
   8  -4   2   58.43   11.96
   8  -4   2   68.18   13.44
  -8   4  -1   34.91    7.47
  -8   4  -1   62.49   10.64
   8  -4   1   38.88    8.58
   8  -4   1   75.95   11.95
  -8   4   0  192.39   14.70
  -8   4   0  198.61   15.10
   8  -4   0  177.85   12.40
   8  -4   0  189.52   15.48
  -8   4   1   17.01    7.30
  -8   4   1   11.30    5.19
   8  -4  -1   27.26    6.69
   8  -4  -1   14.59    5.00
  -8   4   2  244.06   17.86
  -8   4   2  245.03   17.14
   8  -4  -2  235.62   14.62
   8  -4  -2  265.58   19.31
  -8   4   3  192.95   14.35
  -8   4   3  170.18   12.88
   8  -4  -3  161.99   10.03
   8  -4  -3  229.41   16.30
  -8   4   4  118.44   11.20
  -8   4   4  126.25    8.85
   8  -4  -4  109.29   15.75
  -8   4   5   92.32   10.77
  -8   4   5  110.23    9.44
   8  -4  -5  133.06   12.24
  -8   4   6    8.29    6.53
  -8   4   6    8.74    4.05
   8  -4  -6    9.67    5.00
  -8   4   7   67.27   11.78
  -8   4   7   61.96    8.00
   8  -4  -7   58.73   11.01
  -8   4   8   33.08   10.33
   8  -4  -8   47.58   13.37
   8  -5   5   15.56    6.19
   8  -5   5   23.81    9.25
  -8   5  -4   25.39    9.08
   8  -5   4   11.74    5.27
   8  -5   4   26.46    9.27
  -8   5  -3  124.99    9.95
  -8   5  -3  124.51   11.54
   8  -5   3  155.52   12.82
   8  -5   3  129.51   11.31
  -8   5  -2   58.46   10.74
  -8   5  -2   72.38    8.72
   8  -5   2   51.83   10.39
   8  -5   2   64.52   15.21
  -8   5  -1   54.02   10.27
  -8   5  -1   56.52   12.92
   8  -5   1   42.62    8.81
   8  -5   1   57.46   11.66
  -8   5   0   51.69   10.70
  -8   5   0   55.78    9.83
   8  -5   0   72.80    9.57
   8  -5   0   48.96   10.31
  -8   5   1    9.33    4.97
  -8   5   1   15.20    6.55
   8  -5  -1    9.17    2.78
   8  -5  -1    0.42    6.71
  -8   5   2   41.22   10.97
  -8   5   2   35.74    9.53
   8  -5  -2   27.52    5.75
   8  -5  -2   33.58    8.54
  -8   5   3   58.52   13.93
  -8   5   3   25.73    6.05
   8  -5  -3   55.82   12.98
  -8   5   4   72.22    9.44
  -8   5   4  110.04   10.07
   8  -5  -4  113.88   11.97
  -8   5   5  135.72   15.16
  -8   5   5  139.53   11.87
   8  -5  -5  164.02   14.20
  -8   5   6   -1.06    6.51
  -8   5   6    9.87    4.02
   8  -5  -6   17.41    6.56
  -8   5   7   31.21   12.66
  -8   5   7   17.15    5.21
   8  -5  -7    6.44    2.83
  -8   6  -5    7.62    4.47
   8  -6   5   16.32    8.80
   8  -6   5    9.74    5.28
  -8   6  -4   52.78   11.22
   8  -6   4   60.13    9.17
   8  -6   4   63.18    9.65
  -8   6  -3   57.00    7.13
  -8   6  -3   39.19   11.90
   8  -6   3   39.28   10.04
   8  -6   3   66.95    8.93
  -8   6  -2  120.10   11.15
  -8   6  -2  120.12   11.94
   8  -6   2  142.58   11.89
   8  -6   2  117.32   11.20
  -8   6  -1  281.78   19.76
  -8   6  -1  264.99   18.99
   8  -6   1  311.83   20.16
   8  -6   1  302.11   22.40
  -8   6   0   81.35    9.52
  -8   6   0   79.75   10.48
   8  -6   0   68.53   11.85
   8  -6   0   85.40   10.12
  -8   6   1   32.54    8.00
  -8   6   1   32.85    7.42
   8  -6  -1   36.81    7.77
  -8   6   2   40.82   10.14
  -8   6   2   31.98    8.07
  -8   6   3   18.67    9.60
  -8   6   3    5.73    4.14
   8  -6  -3    4.31    5.53
  -8   6   4  105.47   11.74
  -8   6   4  109.78   10.07
   8  -6  -4  107.89   11.72
  -8   6   5   35.78    9.83
  -8   6   5   22.32    7.73
   8  -6  -5   14.22    5.90
  -8   6   6   43.35   11.81
  -8   6   6   41.39    9.26
   8  -6  -6   48.25   13.40
  -8   7  -5   21.46    7.88
   8  -7   5   47.24    8.86
   8  -7   5   36.95    8.91
  -8   7  -4   -9.99    4.56
   8  -7   4    9.21    4.78
   8  -7   4    8.05    5.01
  -8   7  -3   10.27    3.37
  -8   7  -3    6.13    5.70
   8  -7   3   15.92    6.23
   8  -7   3   11.33    5.92
  -8   7  -2   47.68    7.55
   8  -7   2   44.73    6.81
   8  -7   2   54.28   10.57
  -8   7  -1  122.15   11.66
  -8   7  -1  124.37   12.02
   8  -7   1  121.93   11.21
  -8   7   0  148.93   13.00
  -8   7   0  148.17   14.35
   8  -7   0  151.43   14.44
  -8   7   1  211.88   16.30
  -8   7   1  249.78   18.46
   8  -7  -1  210.68   17.85
  -8   7   2  116.12   11.35
  -8   7   2  127.44   12.01
   8  -7  -2  144.24   12.63
  -8   7   3   48.79   11.74
  -8   7   3   39.40    9.63
   8  -7  -3   28.73    7.52
  -8   7   4    4.08    6.76
  -8   7   4   21.34    6.86
   8  -7  -4   28.43    8.12
  -8   7   5   12.34    6.82
  -8   7   5    6.67    4.11
   8  -7  -5   35.19    8.84
  -8   8  -3   84.46    9.35
  -8   8  -3   93.46   11.12
   8  -8   3   78.22   10.70
  -8   8  -2   54.24    9.93
   8  -8   2   66.76    8.86
  -8   8  -1    7.62    4.69
  -8   8  -1   13.46    5.79
   8  -8   1   11.50    7.04
  -8   8   0   54.21    8.97
  -8   8   0   35.42   10.35
   8  -8   0   46.96   12.43
  -8   8   1   75.41   12.45
  -8   8   1   61.84    9.22
   8  -8  -1   74.48    9.08
  -8   8   2   95.83   12.29
  -8   8   2   81.59   10.89
   8  -8  -2   53.04    9.36
  -9  -6   5    7.26    5.28
  -9  -6   5    7.01    5.14
   9   6  -5    6.63    6.83
  -9  -6   6    5.14    4.61
  -9  -6   6   17.87    5.94
   9   6  -6   17.91    7.34
  -9  -6   7   13.84    6.52
  -9  -6   7    9.14    3.20
   9   6  -7   19.25    7.55
  -9  -6   8    8.18    5.99
   9   6  -8   -3.73    5.78
  -9  -6   9   23.94    9.48
   9   6  -9    6.75    5.33
  -9  -5   2   17.01    7.16
  -9  -5   2   20.37    7.75
   9   5  -2   21.58   12.38
  -9  -5   3   16.22    6.96
  -9  -5   3   14.69    6.83
   9   5  -3    5.49    5.91
  -9  -5   4   12.91    4.65
  -9  -5   4    6.91    7.10
   9   5  -4   10.48    6.42
  -9  -5   5    6.43    5.04
  -9  -5   5    2.41    3.55
   9   5  -5   -1.32    6.20
  -9  -5   6   33.32    9.67
  -9  -5   6   21.65    7.07
   9   5  -6   32.73    9.33
   9   5  -6   10.57    4.01
  -9  -5   7    4.83    5.36
  -9  -5   7    1.79    2.75
   9   5  -7   11.00    7.46
   9   5  -7    9.27    4.88
  -9  -5   8   13.66    6.62
   9   5  -8    6.39    5.36
   9   5  -8    8.82    3.66
  -9  -5   9   70.45    9.13
   9   5  -9  110.69   11.96
   9   5  -9   88.10    9.31
  -9  -5  10   36.49   12.31
   9   5 -10   14.00    8.73
   9   5 -10    9.36    4.95
  -9  -4   1    4.34    3.13
   9   4  -1    9.44    9.79
  -9  -4   2    4.47    3.49
  -9  -4   2   16.54    8.32
   9   4  -2   13.72    7.21
  -9  -4   3   17.57    7.77
  -9  -4   3   12.55    5.65
   9   4  -3    0.14    6.58
  -9  -4   4   28.73    8.50
  -9  -4   4   29.44    9.35
   9   4  -4   35.99    9.81
   9   4  -4   24.51    7.74
  -9  -4   5   10.28    5.62
  -9  -4   5    6.65    3.02
   9   4  -5   19.76    8.29
   9   4  -5   14.12    5.05
  -9  -4   6   10.21    6.29
  -9  -4   6   10.45    3.46
   9   4  -6   11.18    5.62
   9   4  -6   10.42    4.14
  -9  -4   7    8.25    5.99
  -9  -4   7   11.15    3.72
   9   4  -7   20.05    8.51
   9   4  -7   17.74    6.87
  -9  -4   8    9.24    6.42
   9   4  -8    1.45    4.64
   9   4  -8   19.95    7.14
  -9  -4   9   35.40    9.96
   9   4  -9   36.84    9.14
   9   4  -9   35.08    9.30
  -9  -4  10    8.75    6.66
   9   4 -10   10.77    6.66
   9   4 -10   10.49    5.42
  -9  -3   0   15.51    5.32
  -9  -3   0   28.37    7.50
  -9  -3   1   15.85    6.19
  -9  -3   1   25.47    7.31
   9   3  -1   21.69   10.60
  -9  -3   2   15.26    5.87
  -9  -3   2    5.89    4.76
   9   3  -2   10.74    6.49
   9   3  -2    2.28    1.62
  -9  -3   3   13.39    6.72
  -9  -3   3    5.51    3.38
   9   3  -3    7.98    8.25
   9   3  -3    3.26    2.29
  -9  -3   4    5.04    5.11
  -9  -3   4    9.50    3.58
   9   3  -4   -5.37    5.36
   9   3  -4    2.40    3.28
  -9  -3   5   29.09    8.14
  -9  -3   5   34.27    9.11
   9   3  -5   26.24    7.27
   9   3  -5   13.06    5.29
  -9  -3   6   17.92    8.46
  -9  -3   6   11.15    3.56
   9   3  -6   11.09    7.43
   9   3  -6   24.24    4.86
  -9  -3   7    7.83    5.88
  -9  -3   7   11.48    3.89
   9   3  -7   14.46    6.00
   9   3  -7   15.79    7.05
  -9  -3   8    3.35    6.75
   9   3  -8    8.50    4.87
   9   3  -8   10.05    3.39
  -9  -3   9   34.01   10.14
   9   3  -9   15.20    7.25
   9   3  -9   15.36    6.00
  -9  -3  10   20.13    8.57
   9   3 -10   14.79    5.65
   9   3 -10    4.22    6.66
  -9  -3  11    5.68    6.81
   9   3 -11   10.40    5.81
   9   3 -11    4.30    5.34
  -9  -2  -1   19.01    7.22
   9   2   1   12.53    7.07
  -9  -2   0    4.79    2.93
  -9  -2   0    4.69    6.38
   9   2   0   -1.94    6.22
  -9  -2   1    9.32    3.64
  -9  -2   1   12.27    5.58
   9   2  -1   -5.40    5.41
   9   2  -1    8.62    4.25
  -9  -2   2   16.48    5.92
  -9  -2   2   20.97    7.01
   9   2  -2   24.32    7.92
   9   2  -2   10.63    3.00
  -9  -2   3   10.98    4.69
  -9  -2   3    5.56    2.53
   9   2  -3   21.64    8.45
   9   2  -3    6.49    2.62
  -9  -2   4    8.60    5.83
  -9  -2   4    8.80    3.99
   9   2  -4    3.94    5.43
   9   2  -4    6.97    2.51
  -9  -2   5   13.84    7.84
  -9  -2   5   25.52    8.68
   9   2  -5   14.71    6.34
   9   2  -5   26.44    7.59
  -9  -2   6   36.15   10.54
  -9  -2   6   19.45    5.09
   9   2  -6   24.97    6.99
   9   2  -6   29.35    9.02
  -9  -2   7   41.53   10.76
  -9  -2   7   16.28    6.10
   9   2  -7   24.70    7.18
   9   2  -7   19.52    7.60
   9   2  -8   16.57    6.78
   9   2  -8   10.74    4.10
  -9  -2   9    5.32    6.78
   9   2  -9   10.66    5.84
   9   2  -9   10.70    3.90
  -9  -2  10    8.12    7.09
   9   2 -10   12.20    5.27
   9   2 -10    3.23    4.24
  -9  -2  11    6.86    7.24
   9   2 -11    6.52    3.20
   9   2 -11   14.70    7.62
  -9  -1  -2    7.14    5.10
   9   1   2   32.96   12.30
  -9  -1  -1    8.34    3.10
  -9  -1  -1    1.52    4.47
   9   1   1   16.99    7.51
   9   1   1   17.22    6.15
  -9  -1   0   36.45    8.71
  -9  -1   0   44.98   13.73
   9   1   0   59.03    9.95
  -9  -1   1   11.65    5.29
  -9  -1   1   21.75    7.36
   9   1  -1    2.04    5.21
   9   1  -1   10.58    4.11
  -9  -1   2   56.64   11.85
  -9  -1   2   42.45   12.55
   9   1  -2   79.99    9.63
   9   1  -2   60.77   11.91
  -9  -1   3   35.12    8.06
  -9  -1   3   29.59    9.47
   9   1  -3   17.03    6.54
   9   1  -3   35.96    8.44
  -9  -1   4   23.08    8.93
  -9  -1   4    7.74    3.23
   9   1  -4   38.67    9.93
   9   1  -4   49.87   11.08
  -9  -1   5   15.85    5.96
  -9  -1   5    4.21    3.25
   9   1  -5    5.12    4.96
   9   1  -5    6.43    2.49
  -9  -1   6   58.45   13.80
  -9  -1   6   37.91   12.04
   9   1  -6   31.29    6.58
   9   1  -6   29.62    8.42
  -9  -1   7   26.30    7.72
  -9  -1   7   12.37    3.65
   9   1  -7   15.37    6.98
  -9  -1   8   44.07   15.07
   9   1  -8   30.46    7.78
   9   1  -8   45.65   13.86
  -9  -1   9   61.32   12.09
   9   1  -9   58.21    7.99
   9   1  -9   49.73   12.28
  -9  -1  10   19.98    8.44
   9   1 -10    9.33    3.65
   9   1 -10   10.74    5.36
  -9   0  -3   42.82   10.49
   9   0   3   59.08   10.76
  -9   0  -2   34.87   10.64
   9   0   2   28.66    6.74
  -9   0  -1   20.50    6.23
  -9   0  -1   43.40    8.22
   9   0   1   18.75    7.85
   9   0   1   46.63    7.32
  -9   0   0    9.34    4.53
  -9   0   0    7.71    4.70
   9   0   0   -1.64    5.28
   9   0   0   -1.46    3.30
  -9   0   1    6.48    3.83
  -9   0   1   15.35    5.45
   9   0  -1    8.13    9.74
   9   0  -1    5.23    3.54
  -9   0   2  142.71   12.80
  -9   0   2  143.52   11.82
   9   0  -2  141.39   13.66
   9   0  -2  153.97   11.94
  -9   0   3   28.05    8.08
  -9   0   3    9.35    5.99
   9   0  -3   14.21    7.89
   9   0  -3    2.57    4.25
  -9   0   4  256.19   14.81
  -9   0   4  245.61   12.69
   9   0  -4  236.65   13.89
   9   0  -4  250.69   12.61
  -9   0   5  153.81   12.71
  -9   0   5  120.41    8.20
   9   0  -5  152.96   10.61
   9   0  -5  136.02   21.19
  -9   0   6  179.95   17.87
  -9   0   6  140.66   10.92
   9   0  -6  142.45   11.15
   9   0  -6  111.75   21.20
  -9   0   7   37.67   10.85
  -9   0   7   22.67    4.68
   9   0  -7   38.71    7.44
   9   0  -7   25.35    5.58
  -9   0   8   17.97    7.52
   9   0  -8   14.08    3.92
   9   0  -8   21.17    6.47
  -9   0   9   28.74   11.30
   9   0  -9   33.72    5.45
   9   0  -9   42.62   11.38
  -9   0  10   20.69   10.51
   9   0 -10   14.33    5.09
  -9   1  -3    8.74    3.81
   9  -1   3    9.51    5.66
   9  -1   3    4.87    5.19
  -9   1  -2   24.68    9.23
   9  -1   2   23.33    8.77
   9  -1   2   38.98    6.80
  -9   1  -1    8.62    3.75
  -9   1  -1   -0.92    4.74
   9  -1   1    4.11    5.47
   9  -1   1   17.22    6.38
  -9   1   0  102.40    9.10
  -9   1   0  135.09   11.75
   9  -1   0  119.26   12.25
   9  -1   0  112.10   10.15
  -9   1   1   12.72    4.65
  -9   1   1   11.71    6.89
   9  -1  -1   30.39    8.99
  -9   1   2   20.51    7.65
  -9   1   2   18.47    7.46
   9  -1  -2   33.11    9.48
   9  -1  -2   17.68    6.64
  -9   1   3   33.84    9.22
  -9   1   3   29.86    7.26
   9  -1  -3   47.59    8.79
   9  -1  -3   31.79    7.74
  -9   1   4   87.38   13.05
  -9   1   4   97.61   13.55
   9  -1  -4   75.82   10.18
   9  -1  -4   88.03   13.66
  -9   1   5   26.73    8.38
  -9   1   5   14.14    4.26
   9  -1  -5   18.35    4.92
   9  -1  -5   18.18    4.10
  -9   1   6   36.59   11.73
  -9   1   6   22.75    6.13
   9  -1  -6   19.65    5.20
   9  -1  -6   28.93    9.69
  -9   1   7   11.53    7.29
  -9   1   7    9.29    3.41
   9  -1  -7   19.20    5.39
   9  -1  -7   21.02    7.62
  -9   1   8   45.56   10.81
   9  -1  -8   19.79    6.28
   9  -1  -8   30.56    9.23
  -9   1   9   11.50    7.35
   9  -1  -9   24.38    7.95
  -9   1  10   35.34   10.76
   9  -1 -10    9.08    7.24
  -9   2  -3    0.62    5.07
   9  -2   3   21.83    6.94
   9  -2   3    3.66    3.87
  -9   2  -2   38.30    7.59
   9  -2   2   22.72    8.73
   9  -2   2   46.11    8.98
  -9   2  -1  211.20   15.49
  -9   2  -1  207.69   17.52
   9  -2   1  185.03   16.72
   9  -2   1  198.94   16.27
  -9   2   0  204.95   14.94
  -9   2   0  243.66   18.63
   9  -2   0  199.00   15.97
   9  -2   0  218.60   16.44
  -9   2   1  202.60   15.67
  -9   2   1  188.51   14.41
   9  -2  -1  158.08   12.22
   9  -2  -1  165.76   12.57
  -9   2   2   66.54   12.72
  -9   2   2   57.93   12.25
   9  -2  -2   40.40    8.64
   9  -2  -2   50.17   10.58
  -9   2   3   30.84    8.49
  -9   2   3   57.27   11.59
   9  -2  -3   40.53    8.05
   9  -2  -3   47.03   11.13
  -9   2   4   43.94   12.42
  -9   2   4   45.52   10.68
   9  -2  -4   56.78   10.99
   9  -2  -4   56.08   12.28
  -9   2   5   28.31   10.21
  -9   2   5   12.08    4.00
   9  -2  -5   10.73    5.02
  -9   2   6   24.71    7.77
  -9   2   6   36.85    7.31
   9  -2  -6   23.19    4.84
   9  -2  -6   22.87    5.35
  -9   2   7   73.13   13.22
  -9   2   7   25.18    6.51
   9  -2  -7   50.92   10.48
  -9   2   8  163.55   21.14
   9  -2  -8   86.56   18.44
  -9   2   9   10.59    8.10
   9  -2  -9   28.28    9.32
  -9   3  -4   53.98   10.12
   9  -3   4   36.84    7.90
   9  -3   4   50.49    9.89
  -9   3  -3   -0.05    5.02
   9  -3   3    9.95    7.94
   9  -3   3    6.34    4.08
  -9   3  -2   39.94    9.02
   9  -3   2   36.07    8.84
   9  -3   2   28.11    9.58
  -9   3  -1   25.80    7.39
  -9   3  -1    3.72    4.83
   9  -3   1    2.63    4.47
   9  -3   1   20.98    7.94
  -9   3   0   32.09    6.70
  -9   3   0   34.12    8.14
   9  -3   0   43.55    9.54
   9  -3   0   55.77   10.83
  -9   3   1   15.11    6.95
  -9   3   1    6.75    4.55
   9  -3  -1   16.43    6.00
   9  -3  -1   16.46    5.49
  -9   3   2   92.38   10.97
  -9   3   2   79.06    8.95
   9  -3  -2   86.04    7.44
   9  -3  -2   86.88    8.88
  -9   3   3  113.41   13.43
  -9   3   3  108.67   10.30
   9  -3  -3  118.90   10.11
   9  -3  -3  127.42   13.24
  -9   3   4   91.80   11.38
  -9   3   4   70.56    7.07
   9  -3  -4   72.63    6.66
   9  -3  -4   75.62    8.51
  -9   3   5   26.59    8.32
  -9   3   5   23.31    5.56
   9  -3  -5   44.10    9.48
  -9   3   6   44.44   13.36
  -9   3   6   72.54    7.56
   9  -3  -6   49.51   14.11
  -9   3   7   48.38   11.85
  -9   3   7   32.86    7.28
   9  -3  -7   53.22   13.61
  -9   3   8   25.10   11.13
   9  -3  -8   30.16    9.81
  -9   4  -4   16.31    9.18
   9  -4   4   11.24    7.92
   9  -4   4   15.70    8.05
  -9   4  -3  114.71   10.74
   9  -4   3  108.54   11.68
   9  -4   3  116.03   10.01
  -9   4  -2   22.58    7.79
   9  -4   2   16.97    6.19
   9  -4   2   17.42    6.70
  -9   4  -1   20.04    6.97
  -9   4  -1   19.63    7.58
   9  -4   1   14.69    5.97
   9  -4   1    9.25    5.07
  -9   4   0    4.62    3.92
  -9   4   0   -4.85    4.29
   9  -4   0    5.99    3.68
   9  -4   0   -2.54    4.37
  -9   4   1   52.11    9.97
  -9   4   1   41.95    7.87
   9  -4  -1   33.98    6.26
   9  -4  -1   61.60   10.30
  -9   4   2   65.89   14.01
  -9   4   2   67.69   12.90
   9  -4  -2   73.64    6.74
   9  -4  -2  104.90   11.44
  -9   4   3   61.76   12.46
  -9   4   3   57.43    9.25
   9  -4  -3   74.59    9.39
  -9   4   4  122.23   13.47
  -9   4   4  125.12   11.93
   9  -4  -4  116.68   11.54
  -9   4   5   40.52    8.61
  -9   4   5   37.63    7.24
   9  -4  -5   49.02    9.89
  -9   4   6   12.36    6.49
  -9   4   6    7.40    4.35
   9  -4  -6   -4.83    4.95
   9  -4  -7   21.91    6.48
  -9   5  -3   75.53    9.37
   9  -5   3   68.22    8.42
   9  -5   3   56.16    7.92
  -9   5  -2   83.37    9.82
  -9   5  -2  120.82   15.89
   9  -5   2   98.64   11.62
   9  -5   2   95.03   12.86
  -9   5  -1  139.01   10.96
  -9   5  -1  167.66   14.22
   9  -5   1  152.56   12.17
   9  -5   1  184.33   16.24
  -9   5   0   49.66    8.39
  -9   5   0   48.19    8.31
   9  -5   0   46.97    6.85
   9  -5   0   60.00   10.35
  -9   5   1    2.07    4.72
  -9   5   1    3.23    4.77
   9  -5  -1    0.80    2.52
   9  -5  -1   11.33    5.36
  -9   5   2    9.83    5.90
  -9   5   2   15.98    8.26
   9  -5  -2   16.68    9.45
  -9   5   3   61.50   12.26
  -9   5   3   43.28    7.67
   9  -5  -3   55.89    8.68
  -9   5   4   63.62   11.12
  -9   5   4   41.21    6.89
   9  -5  -4   51.38    8.89
  -9   5   5   82.97   14.17
  -9   5   5   64.78    8.73
  -9   5   6   93.22   13.09
  -9   5   6   76.18    9.12
   9  -5  -6   86.98   17.04
  -9   6  -3    7.24    4.95
   9  -6   3   15.18    6.88
   9  -6   3   20.26    8.66
  -9   6  -2   71.64    7.75
  -9   6  -2   59.65    7.55
   9  -6   2   60.11    7.14
   9  -6   2   75.26    8.76
  -9   6  -1   37.02    8.21
  -9   6  -1   46.27   10.09
   9  -6   1   26.92    6.21
   9  -6   1   29.07    9.63
  -9   6   0  133.76   15.27
  -9   6   0  136.85   15.48
   9  -6   0  132.97   15.18
  -9   6   1  158.40   17.86
  -9   6   1  150.35   17.32
   9  -6  -1  151.87   18.13
  -9   6   2   65.09   10.23
  -9   6   2  108.15   14.20
   9  -6  -2   77.80   10.66
  -9   6   3   17.79    6.72
  -9   6   3   19.13    6.90
   9  -6  -3   31.37    9.95
  -9   6   4   23.55    7.59
  -9   6   4   15.84    5.41
   9  -6  -4   11.89    5.44
  -9   7  -1   15.31    6.80
  -9   7  -1   24.60    9.90
   9  -7   1   16.49    7.65
  -9   7   0   24.86    9.98
  -9   7   0   33.05   10.06
   9  -7   0   28.72    9.95
  -9   7   1   45.73    9.51
  -9   7   1   48.62    8.53
   9  -7  -1   66.76   10.17
  -9   7   2  131.77   16.94
  -9   7   2  120.41   15.08
   9  -7  -2  125.95   16.86
 -10  -4   5   20.67    8.35
 -10  -4   5   18.46    8.20
  10   4  -5   14.34    8.43
 -10  -4   6   17.50    8.95
 -10  -4   6   13.82    5.50
  10   4  -6   24.95   11.38
  10   4  -6    5.04    3.14
 -10  -4   7   29.81   11.47
 -10  -4   7    7.43    3.76
  10   4  -7   -0.45    5.09
  10   4  -7    6.11    2.41
 -10  -3   3   25.99   10.24
 -10  -3   3    5.72    3.10
  10   3  -3   28.61   11.64
 -10  -3   4   -1.70    4.46
 -10  -3   4    6.39    2.67
  10   3  -4    6.53    4.99
  10   3  -4    7.88    2.74
[truncated: 6,789 more chars]
